# Supplementary material for: Vitamin C Supplementation Mitigates Diabetes-Associated Skeletal Muscle Atrophy
Source: Research Square preprint supplement (doi:10.21203/rs.3.rs-8342512/v1), 2026-02-12
Supplement: Supplementary file 1 [file 4e37351e01ba01160e7d6843.xlsx]

## Sheet: results_AA_vs_HSD_sig
	baseMean	log2FoldChange	lfcSE	stat	pvalue	padj	gene
TwdlY	980.57	-9.13496	0.498453	-18.3266	5.07256e-75	6.81803e-71	TwdlY
mthl4	1063.76	3.19647	0.186842	17.1078	1.297e-65	8.71646e-62	mthl4
TwdlM	2756.83	-12.1204	0.709888	-17.0736	2.33225e-65	1.04492e-61	TwdlM
CG12480	2713.39	-7.75652	0.455814	-17.0168	6.16013e-65	2.06996e-61	CG12480
CG4115	867.592	-3.40596	0.215946	-15.7723	4.82747e-56	1.29772e-52	CG4115
Lcp65Ag2	4596.24	-6.67626	0.42396	-15.7474	7.15756e-56	1.60341e-52	Lcp65Ag2
TwdlB	2389.25	-11.8931	0.791715	-15.0219	5.27565e-51	1.013e-47	TwdlB
TwdlL	770.597	-9.78919	0.662534	-14.7754	2.11135e-49	3.54733e-46	TwdlL
CG5326	827.123	-4.62125	0.316226	-14.6137	2.29626e-48	3.42933e-45	CG5326
sncRNA:419	409.023	-3.39383	0.243087	-13.9614	2.68166e-44	3.60442e-41	sncRNA:419
Lcp65Ag3	12128	-4.53263	0.337969	-13.4114	5.18679e-41	6.33779e-38	Lcp65Ag3
CG34227	1899.74	5.73199	0.429347	13.3505	1.17652e-40	1.3178e-37	CG34227
CG30457	5444.46	-4.33509	0.338636	-12.8017	1.60502e-37	1.65947e-34	CG30457
Mal-B2	435.725	2.0939	0.164316	12.7432	3.40362e-37	3.26772e-34	Mal-B2
CG8563	505.275	-3.67071	0.289172	-12.6939	6.39324e-37	5.72877e-34	CG8563
TwdlP	889.378	-6.36203	0.503168	-12.6439	1.20851e-36	1.01522e-33	TwdlP
alphaTub85E	1173.5	-3.28374	0.263407	-12.4664	1.13823e-35	8.99938e-33	alphaTub85E
CG34330	393.905	4.56485	0.36985	12.3424	5.35132e-35	3.99595e-32	CG34330
CG32694	2320.28	-3.49252	0.287203	-12.1605	5.04797e-34	3.57104e-31	CG32694
Ance-5	309.393	-5.022	0.416653	-12.0532	1.86569e-33	1.25384e-30	Ance-5
Lcp9	2200.68	4.41724	0.369863	11.9429	7.07051e-33	4.52546e-30	Lcp9
asRNA:CR46005	13964.6	-4.0019	0.335483	-11.9288	8.3791e-33	5.11925e-30	asRNA:CR46005
Gs1	5625.42	-2.78309	0.233543	-11.9168	9.6733e-33	5.65299e-30	Gs1
CG11345	746.558	-4.01844	0.338812	-11.8604	1.90108e-32	1.06468e-29	CG11345
CG10953	13842.5	-4.14587	0.351674	-11.789	4.44958e-32	2.39227e-29	CG10953
Obp56a	1703.74	-4.32572	0.373733	-11.5743	5.55917e-31	2.87388e-28	Obp56a
CG9521	573.663	-3.93942	0.340457	-11.571	5.78256e-31	2.87865e-28	CG9521
CG2765	3002.62	-2.29302	0.199728	-11.4807	1.64932e-30	7.91732e-28	CG2765
TwdlK	1287.82	-14.2055	1.2467	-11.3945	4.45497e-30	2.0648e-27	TwdlK
betaTub60D	1388.86	-2.00537	0.176816	-11.3416	8.1671e-30	3.65913e-27	betaTub60D
CG17104	940.691	-2.76628	0.244657	-11.3067	1.21517e-29	5.26876e-27	CG17104
CG2017	566.897	1.93762	0.171503	11.2979	1.34446e-29	5.64716e-27	CG2017
AMPdeam	2343.54	1.78221	0.158285	11.2595	2.08018e-29	8.47264e-27	AMPdeam
CG43386	459.063	-6.49138	0.57809	-11.229	2.93742e-29	1.16123e-26	CG43386
CG13324	245.395	4.2476	0.379087	11.2048	3.86162e-29	1.48297e-26	CG13324
CG15414	405.186	-3.71803	0.334965	-11.0998	1.25784e-28	4.69628e-26	CG15414
CG13323	683.644	3.7796	0.346437	10.9099	1.03366e-27	3.75498e-25	CG13323
CG10598	300.305	-6.00763	0.552238	-10.8787	1.45635e-27	5.15126e-25	CG10598
slf	21409.8	-2.50577	0.231198	-10.8382	2.26836e-27	7.81769e-25	slf
BomS2	75.6804	4.73391	0.437648	10.8167	2.86913e-27	9.64099e-25	BomS2
CG10026	142.505	3.83562	0.356858	10.7483	6.03476e-27	1.97837e-24	CG10026
CG9782	2866.65	-3.09655	0.288637	-10.7282	7.50572e-27	2.40201e-24	CG9782
CG17290	181.61	-6.93293	0.647974	-10.6994	1.02453e-26	3.2025e-24	CG17290
betaNACtes1	168.682	-5.43133	0.508782	-10.6752	1.3303e-26	4.06377e-24	betaNACtes1
Lcp65Ag1	10941	-4.16035	0.390201	-10.6621	1.53156e-26	4.57461e-24	Lcp65Ag1
CG11835	1755	2.96802	0.283318	10.4759	1.11469e-25	3.25708e-23	CG11835
TwdlO	5572.69	-5.61806	0.543603	-10.3349	4.90093e-25	1.40156e-22	TwdlO
CG18473	1070.58	2.57205	0.252487	10.1869	2.26974e-24	6.35574e-22	CG18473
CG13047	282.841	-6.67749	0.656013	-10.1789	2.46309e-24	6.7564e-22	CG13047
plx	1579.94	1.63407	0.161257	10.1333	3.9313e-24	1.05681e-21	plx
CG10175	307.142	-3.38779	0.335091	-10.1101	4.98504e-24	1.3138e-21	CG10175
CG1368	1573.15	-3.35014	0.33227	-10.0826	6.59583e-24	1.7049e-21	CG1368
Sobp	196.119	2.26173	0.22466	10.0673	7.70498e-24	1.95401e-21	Sobp
CG15023	304.008	-7.58876	0.757881	-10.0131	1.33464e-23	3.32203e-21	CG15023
uzip	1153.86	-1.45141	0.146244	-9.9246	3.2542e-23	7.95267e-21	uzip
rdgC	402.581	1.93962	0.19585	9.90358	4.01651e-23	9.64035e-21	rdgC
Cpr78Cc	1212.66	-4.54209	0.459865	-9.87701	5.23741e-23	1.23502e-20	Cpr78Cc
mthl3	2682.27	1.7882	0.181852	9.8333	8.09208e-23	1.87527e-20	mthl3
Cpr67Fb	267.118	-7.30532	0.745467	-9.79966	1.12964e-22	2.53165e-20	Cpr67Fb
CG40198	4965.39	-3.39266	0.346204	-9.79962	1.13012e-22	2.53165e-20	CG40198
BomS3	101.506	5.45241	0.557605	9.77827	1.39581e-22	3.07559e-20	BomS3
sit	1769.31	-3.2927	0.336814	-9.77599	1.42754e-22	3.09478e-20	sit
CAH2	2843.76	-1.94782	0.200099	-9.73426	2.15382e-22	4.59516e-20	CAH2
Tsp	535.649	-2.62444	0.270375	-9.70665	2.8247e-22	5.93231e-20	Tsp
obst-A	4200.79	-3.48061	0.359838	-9.67272	3.93754e-22	8.14224e-20	obst-A
CG13067	3332.23	-3.93283	0.406983	-9.66337	4.31435e-22	8.78624e-20	CG13067
CG40006	714.712	-2.33053	0.24266	-9.6041	7.68225e-22	1.54115e-19	CG40006
stw	2227.31	-1.70887	0.178121	-9.59388	8.48317e-22	1.6768e-19	stw
CG9192	257.592	-5.9729	0.626666	-9.53124	1.55416e-21	3.02746e-19	CG9192
CG7724	195.502	-4.19587	0.440662	-9.52176	1.70279e-21	3.26959e-19	CG7724
Syp	4527.6	3.00968	0.316925	9.49649	2.17076e-21	4.10946e-19	Syp
CG18609	440.831	-4.12815	0.434794	-9.49451	2.2124e-21	4.13013e-19	CG18609
MFS12	129.319	4.19444	0.441991	9.48987	2.31317e-21	4.25908e-19	MFS12
asRNA:CR45171	275.021	-5.47456	0.578001	-9.47155	2.75732e-21	5.00826e-19	asRNA:CR45171
CG9993	366.909	-4.72766	0.501158	-9.43346	3.96778e-21	7.11079e-19	CG9993
Cpr49Ah	81.1851	4.94635	0.525371	9.41497	4.73232e-21	8.36935e-19	Cpr49Ah
CG11905	310.361	-7.78713	0.830775	-9.37333	7.02814e-21	1.22682e-18	CG11905
CG30458	215.516	-7.22397	0.773848	-9.33512	1.00878e-20	1.73834e-18	CG30458
asRNA:CR46133	326.767	2.06127	0.221593	9.30207	1.37734e-20	2.3434e-18	asRNA:CR46133
CG12164	199.562	-9.05284	0.974288	-9.29175	1.51775e-20	2.55001e-18	CG12164
loh	328.739	-2.34448	0.253534	-9.24722	2.30402e-20	3.82325e-18	loh
Cpr67Fa2	1839.04	-2.44974	0.266763	-9.18321	4.18439e-20	6.70754e-18	Cpr67Fa2
CG30440	533.304	-1.95672	0.213109	-9.18181	4.23914e-20	6.70754e-18	CG30440
CG32486	1088.23	1.857	0.202277	9.18048	4.29171e-20	6.70754e-18	CG32486
CG31817	131.433	2.8801	0.31365	9.18253	4.21084e-20	6.70754e-18	CG31817
Lsp1alpha	1524.78	8.12465	0.884944	9.18098	4.27176e-20	6.70754e-18	Lsp1alpha
CG33110	473.192	-3.04092	0.331945	-9.16089	5.14706e-20	7.95191e-18	CG33110
Atg16	756.091	1.81913	0.199021	9.14038	6.22327e-20	9.50534e-18	Atg16
CG32266	1061.36	-5.75916	0.631656	-9.11756	7.6837e-20	1.16041e-17	CG32266
asRNA:CR45481	485.949	-3.01316	0.330852	-9.10727	8.4484e-20	1.26172e-17	asRNA:CR45481
CG6414	484.551	-3.01241	0.332547	-9.0586	1.32137e-19	1.95171e-17	CG6414
CG6432	223.555	-3.33854	0.368817	-9.05203	1.40339e-19	2.05032e-17	CG6432
CG14566	365.296	-4.2906	0.474924	-9.0343	1.65057e-19	2.38551e-17	CG14566
CG14326	236.248	-11.758	1.30351	-9.0202	1.87744e-19	2.68454e-17	CG14326
cal1	4199.52	1.64685	0.183414	8.97884	2.7363e-19	3.87144e-17	cal1
Lcp65Af	2971.56	-7.75454	0.865256	-8.96214	3.18442e-19	4.45852e-17	Lcp65Af
lncRNA:CR43626	88.7453	3.96663	0.444752	8.91874	4.71607e-19	6.53492e-17	lncRNA:CR43626
NimC1	232.923	-4.03514	0.453302	-8.90165	5.50204e-19	7.54622e-17	NimC1
CG8888	5773.26	1.4705	0.165727	8.87303	7.11802e-19	9.66397e-17	CG8888
CG15249	103.545	-4.53203	0.514824	-8.80306	1.3313e-18	1.7894e-16	CG15249
lncRNA:CR42862	55101.6	1.85764	0.211514	8.78256	1.59793e-18	2.12652e-16	lncRNA:CR42862
hoe2	559.962	2.23908	0.255134	8.77608	1.69278e-18	2.23065e-16	hoe2
CG14324	187.402	-11.4226	1.31738	-8.67066	4.29626e-18	5.6064e-16	CG14324
Cpr78Cb	152.791	-6.40045	0.741553	-8.63114	6.07421e-18	7.85034e-16	Cpr78Cb
CG14598	312.055	-3.74794	0.435527	-8.60554	7.59561e-18	9.60321e-16	CG14598
CG11370	9208.93	-2.23118	0.259252	-8.60622	7.55078e-18	9.60321e-16	CG11370
CG31211	770.021	1.56321	0.181667	8.6048	7.64484e-18	9.60321e-16	CG31211
Cubn2	119.522	-5.04385	0.591511	-8.52705	1.50124e-17	1.86834e-15	Cubn2
NtR	155.685	-2.87955	0.339581	-8.47972	2.25732e-17	2.78354e-15	NtR
Cpr47Eg	14503.4	-4.1122	0.485982	-8.46162	2.63682e-17	3.22196e-15	Cpr47Eg
nclb	263.821	-1.69661	0.200643	-8.45584	2.77085e-17	3.35522e-15	nclb
Caper	1017.67	1.18896	0.140777	8.44571	3.02192e-17	3.62657e-15	Caper
TwdlX	1553.04	-2.92819	0.347306	-8.43116	3.42246e-17	4.07091e-15	TwdlX
TwdlN	2474.33	-11.164	1.32831	-8.40468	4.29015e-17	5.05824e-15	TwdlN
drm	301.359	-1.86644	0.222811	-8.37679	5.43886e-17	6.35685e-15	drm
PNUTS	1766.28	1.61099	0.192958	8.34894	6.888e-17	7.98117e-15	PNUTS
Cpr67Fa1	1898.52	-2.39006	0.286866	-8.3316	7.97545e-17	9.16222e-15	Cpr67Fa1
CG13796	193.824	3.70701	0.445261	8.32548	8.39851e-17	9.56647e-15	CG13796
CG14752	135.713	-6.81217	0.820554	-8.30191	1.02448e-16	1.15715e-14	CG14752
Ythdc1	1136.1	1.68072	0.203909	8.2425	1.68652e-16	1.88904e-14	Ythdc1
CG11581	180.589	-7.95912	0.966468	-8.23527	1.7916e-16	1.99015e-14	CG11581
Hsp83	12811.1	-2.36542	0.290768	-8.13507	4.11691e-16	4.53569e-14	Hsp83
LpR1	1619.07	2.10881	0.260115	8.10723	5.17883e-16	5.65925e-14	LpR1
Ccp84Ag	631.308	-3.24998	0.401294	-8.09875	5.55288e-16	6.01905e-14	Ccp84Ag
CG15597	3564.11	-1.75271	0.216475	-8.09661	5.65138e-16	6.07682e-14	CG15597
Cht7	3360.78	-1.62631	0.201364	-8.07646	6.66716e-16	7.11217e-14	Cht7
CG7675	1066.78	-2.31807	0.287728	-8.05647	7.85324e-16	8.31145e-14	CG7675
CG12769	221.695	-5.13685	0.637735	-8.05484	7.95828e-16	8.35681e-14	CG12769
CG42807	604.735	3.19484	0.396974	8.04797	8.41768e-16	8.7707e-14	CG42807
CG17999	121.041	-4.35001	0.54158	-8.03208	9.58363e-16	9.90874e-14	CG17999
Argk1	76796.2	2.0003	0.249294	8.02385	1.02481e-15	1.05149e-13	Argk1
CG3777	2852.15	-2.38806	0.297758	-8.02012	1.05643e-15	1.07572e-13	CG3777
BomBc3	102.711	4.47246	0.559677	7.99115	1.33688e-15	1.35105e-13	BomBc3
CG31626	873.549	-5.55714	0.695617	-7.98879	1.36267e-15	1.36684e-13	CG31626
Xe7	1199.92	1.45043	0.182182	7.96142	1.70083e-15	1.69339e-13	Xe7
Sodh-2	2560.87	2.14769	0.270034	7.95342	1.81426e-15	1.79304e-13	Sodh-2
Ccp84Ae	251.929	-10.8892	1.37075	-7.94399	1.95787e-15	1.92086e-13	Ccp84Ae
Fatp2	215.553	-2.47018	0.311222	-7.93703	2.07088e-15	2.017e-13	Fatp2
CG15554	97.7609	-3.74863	0.47258	-7.93227	2.15184e-15	2.08078e-13	CG15554
CG41520	966.875	-2.24026	0.282509	-7.92987	2.19367e-15	2.10608e-13	CG41520
TwdlJ	1558.96	-10.7107	1.35592	-7.89924	2.80604e-15	2.67489e-13	TwdlJ
Gyc88E	139.841	2.6256	0.332752	7.89056	3.00836e-15	2.84756e-13	Gyc88E
Cyp18a1	808.346	-2.39503	0.30382	-7.88305	3.19488e-15	3.00296e-13	Cyp18a1
CG7255	369.47	1.82704	0.231872	7.87949	3.28725e-15	3.06833e-13	CG7255
CG15731	454.361	-10.2574	1.30325	-7.87065	3.52796e-15	3.2703e-13	CG15731
CG31712	799.617	1.73879	0.221486	7.85056	4.14186e-15	3.81306e-13	CG31712
Ugt37C1	317.471	-3.22598	0.411472	-7.84009	4.50217e-15	4.11657e-13	Ugt37C1
asRNA:CR45195	2207.66	2.09558	0.267514	7.83352	4.74405e-15	4.30843e-13	asRNA:CR45195
reb	1067.3	-1.45248	0.186343	-7.79468	6.45725e-15	5.82496e-13	reb
CG42808	1083.98	-2.50131	0.321126	-7.78919	6.74413e-15	6.04319e-13	CG42808
CG14568	128.645	-7.99977	1.02725	-7.7876	6.82944e-15	6.07911e-13	CG14568
Nop56	413.958	-1.72635	0.222536	-7.75761	8.65466e-15	7.65311e-13	Nop56
CG6398	659.357	-1.31848	0.170656	-7.72595	1.11022e-14	9.68993e-13	CG6398
Pitslre	1539.21	1.48157	0.191752	7.72647	1.10572e-14	9.68993e-13	Pitslre
CG17230	468.519	1.56695	0.203265	7.70894	1.2687e-14	1.10017e-12	CG17230
sano	372.834	-2.46641	0.320502	-7.69546	1.40991e-14	1.21478e-12	sano
CG8545	432.825	-1.32975	0.172871	-7.69214	1.44698e-14	1.23878e-12	CG8545
CG14422	5567.69	-10.4128	1.35661	-7.67561	1.64629e-14	1.39538e-12	CG14422
CG42246	70.5274	-4.19578	0.546663	-7.67527	1.65066e-14	1.39538e-12	CG42246
yellow-d2	534.027	4.20793	0.548576	7.67064	1.71142e-14	1.4377e-12	yellow-d2
Lcp2	5657.13	6.91825	0.902123	7.66885	1.73539e-14	1.44878e-12	Lcp2
Cda4	1782.8	-1.9175	0.250152	-7.66531	1.78404e-14	1.4802e-12	Cda4
bond	712.523	-2.93995	0.384838	-7.63943	2.18179e-14	1.79911e-12	bond
CDase	114.455	-2.17282	0.285433	-7.61238	2.69087e-14	2.20537e-12	CDase
CG11438	152.129	-2.44396	0.322464	-7.57902	3.48178e-14	2.83026e-12	CG11438
CG5191	444.868	-1.61846	0.213559	-7.57851	3.49545e-14	2.83026e-12	CG5191
CG3348	457.479	-2.50811	0.331409	-7.56802	3.78953e-14	3.05001e-12	CG3348
srl	409.75	-1.82978	0.242384	-7.5491	4.38272e-14	3.50644e-12	srl
CG1441	450.856	-2.96174	0.393026	-7.53574	4.85587e-14	3.86199e-12	CG1441
Hml	3239.17	-3.06171	0.408603	-7.49312	6.72545e-14	5.31746e-12	Hml
Lcp65Ab1	4013.27	2.44819	0.327391	7.47788	7.55299e-14	5.93683e-12	Lcp65Ab1
Nep1	487.689	-1.78382	0.238726	-7.47225	7.88355e-14	6.16063e-12	Nep1
Lcp65Ab2	4013.57	2.44938	0.327837	7.47134	7.93829e-14	6.16755e-12	Lcp65Ab2
CG10205	184.411	-5.12999	0.690197	-7.43265	1.06441e-13	8.22229e-12	CG10205
CG14445	866.217	-2.54615	0.342638	-7.43103	1.07753e-13	8.27607e-12	CG14445
CG13705	3701.64	-4.03007	0.542533	-7.42824	1.10052e-13	8.40463e-12	CG13705
CG31832	172.206	-4.53296	0.610874	-7.42046	1.16717e-13	8.8632e-12	CG31832
Gcat	162.951	2.49905	0.337527	7.40401	1.32128e-13	9.97714e-12	Gcat
CG7465	5176.04	-4.22768	0.572174	-7.38881	1.48147e-13	1.11243e-11	CG7465
snsl	163.811	-2.58157	0.349748	-7.38124	1.56826e-13	1.17105e-11	snsl
CG1124	649.03	-2.75459	0.37368	-7.37151	1.68703e-13	1.25278e-11	CG1124
CG2150	121.908	-8.4282	1.14346	-7.37076	1.69654e-13	1.25292e-11	CG2150
CG5715	45.9382	-9.3713	1.27265	-7.36362	1.78994e-13	1.31467e-11	CG5715
CG3823	74.2651	-3.6063	0.49026	-7.3559	1.89649e-13	1.38536e-11	CG3823
CG4716	217.102	4.31004	0.586	7.35501	1.90909e-13	1.38703e-11	CG4716
rgr	334.939	2.19094	0.298265	7.34561	2.0482e-13	1.4801e-11	rgr
pit	211.883	-1.58875	0.216608	-7.33467	2.22264e-13	1.59757e-11	pit
TwdlG	234.658	-4.01377	0.548056	-7.32364	2.4133e-13	1.72538e-11	TwdlG
CG14569	523.39	-9.50272	1.30137	-7.30207	2.8338e-13	2.0153e-11	CG14569
Iml1	596.878	1.49682	0.205476	7.28466	3.22484e-13	2.28132e-11	Iml1
CG17267	170.056	-6.16168	0.846025	-7.28309	3.26261e-13	2.29595e-11	CG17267
CG9799	178.342	-1.71336	0.235567	-7.27333	3.50723e-13	2.45524e-11	CG9799
CG34166	1863.05	4.47811	0.615755	7.27255	3.52759e-13	2.4567e-11	CG34166
TwdlT	278.363	-5.3148	0.73117	-7.26891	3.62406e-13	2.51088e-11	TwdlT
koi	904.219	-1.14681	0.157795	-7.26773	3.65572e-13	2.51982e-11	koi
Cont	2165.82	-1.13484	0.15664	-7.2449	4.32749e-13	2.96765e-11	Cont
lncRNA:CR44779	304.868	2.70994	0.374756	7.23122	4.78683e-13	3.24948e-11	lncRNA:CR44779
Desi	63.6112	3.5823	0.495386	7.23133	4.78281e-13	3.24948e-11	Desi
pdgy	3070.26	1.60633	0.222205	7.22904	4.86428e-13	3.28546e-11	pdgy
aru	938.177	-1.22847	0.17005	-7.22421	5.04039e-13	3.38739e-11	aru
Cpr65Ax1	853.217	-3.39027	0.470762	-7.20167	5.94814e-13	3.97756e-11	Cpr65Ax1
Smyd3	166.405	2.027	0.28165	7.19688	6.16076e-13	4.09934e-11	Smyd3
AttA	85.7206	3.74686	0.521792	7.18076	6.93235e-13	4.59004e-11	AttA
Cpr51A	819.89	-4.02884	0.561627	-7.17353	7.30897e-13	4.81568e-11	Cpr51A
CG4294	566.89	1.40293	0.196116	7.15359	8.45355e-13	5.54264e-11	CG4294
CG10623	656.078	1.94103	0.271728	7.1433	9.1117e-13	5.94516e-11	CG10623
CG33939	88.8939	-2.7163	0.381173	-7.12615	1.03218e-12	6.70219e-11	CG33939
Lcp65Ae	584.86	-4.16552	0.58483	-7.12262	1.05894e-12	6.8429e-11	Lcp65Ae
asRNA:CR44062	112.997	-3.58888	0.504052	-7.12006	1.07883e-12	6.93809e-11	asRNA:CR44062
CG7299	11271.8	-1.49933	0.211025	-7.10499	1.2033e-12	7.66518e-11	CG7299
CG43131	59.7437	6.53107	0.919169	7.10541	1.19966e-12	7.66518e-11	CG43131
Cpr65Ax2	857.81	-3.35683	0.472596	-7.10297	1.22102e-12	7.74138e-11	Cpr65Ax2
Ppn	4097.53	-2.62506	0.370148	-7.09192	1.32261e-12	8.34608e-11	Ppn
CG14132	1034.79	-2.12779	0.300309	-7.08533	1.38715e-12	8.71245e-11	CG14132
CG31345	94.5815	-3.20128	0.452573	-7.07351	1.51063e-12	9.40019e-11	CG31345
CG1698	490.953	-2.32281	0.328369	-7.07379	1.5076e-12	9.40019e-11	CG1698
rngo	1111.7	1.47903	0.209707	7.05283	1.75309e-12	1.08587e-10	rngo
Pde6	622.261	1.61898	0.229968	7.04001	1.92227e-12	1.18519e-10	Pde6
CG10576	2043.99	-1.04182	0.148272	-7.0264	2.11924e-12	1.30067e-10	CG10576
Ypel	577.57	1.7312	0.246746	7.01611	2.2813e-12	1.39377e-10	Ypel
Socs16D	775.594	1.08028	0.154095	7.01047	2.37521e-12	1.44458e-10	Socs16D
CG32793	1579.83	-9.31062	1.33047	-6.99799	2.59657e-12	1.57209e-10	CG32793
Cpr65Ec	110.281	-4.45345	0.639065	-6.9687	3.19881e-12	1.92803e-10	Cpr65Ec
CG5033	211.595	-1.71331	0.246095	-6.96199	3.35487e-12	2.01307e-10	CG5033
CG32249	12272.8	3.17143	0.455689	6.95964	3.41146e-12	2.03793e-10	CG32249
RhoGAP102A	3614.46	2.21263	0.318854	6.93931	3.9403e-12	2.34344e-10	RhoGAP102A
La	537.764	-1.28874	0.188346	-6.84242	7.78681e-12	4.61068e-10	La
CG13983	157.027	-23.6932	3.46366	-6.8405	7.89175e-12	4.65233e-10	CG13983
Ccdc85	193.541	-1.77921	0.260783	-6.82255	8.94369e-12	5.22662e-10	Ccdc85
CG42259	200.993	1.73825	0.254775	6.8227	8.93472e-12	5.22662e-10	CG42259
CG11852	2373.96	-2.69865	0.395587	-6.82187	8.98615e-12	5.2287e-10	CG11852
Sc2	562.575	-1.58654	0.232685	-6.81841	9.20516e-12	5.33304e-10	Sc2
CG4982	117.966	-5.12067	0.7526	-6.80397	1.01772e-11	5.87089e-10	CG4982
CG13230	4024.03	-1.96832	0.289433	-6.80061	1.04179e-11	5.98408e-10	CG13230
CG32214	97.4068	-9.51382	1.39996	-6.79579	1.07723e-11	6.1352e-10	CG32214
CG12607	3635.96	-2.40477	0.353833	-6.79634	1.07313e-11	6.1352e-10	CG12607
CG16786	330.612	-4.48247	0.661204	-6.77925	1.20803e-11	6.85113e-10	CG16786
Vajk1	1034.98	-7.90199	1.16751	-6.76821	1.30383e-11	7.36334e-10	Vajk1
serp	9774.63	-1.75095	0.260511	-6.7212	1.8023e-11	1.01359e-09	serp
Vajk4	347.479	-9.99593	1.48952	-6.71082	1.93528e-11	1.08384e-09	Vajk4
verm	11609.7	-1.51645	0.226172	-6.70486	2.01601e-11	1.12437e-09	verm
CG17107	136.747	2.9662	0.442448	6.70405	2.02722e-11	1.12595e-09	CG17107
Cyp4c3	730.875	-2.83725	0.42337	-6.70157	2.06186e-11	1.14047e-09	Cyp4c3
CG10948	537.789	1.51194	0.225796	6.69605	2.14132e-11	1.17957e-09	CG10948
TwdlW	417.159	-11.6124	1.73926	-6.67663	2.44493e-11	1.34132e-09	TwdlW
Cpr49Ae	231.447	-3.52689	0.531009	-6.64186	3.09739e-11	1.69236e-09	Cpr49Ae
Cpr49Ag	1376.69	-1.57047	0.23671	-6.63458	3.25417e-11	1.7691e-09	Cpr49Ag
Abca3	296.164	2.06909	0.311886	6.63413	3.26416e-11	1.7691e-09	Abca3
mod	1812.65	-1.22198	0.184238	-6.63259	3.29839e-11	1.78047e-09	mod
Hacd1	243.905	-1.87131	0.282237	-6.6303	3.35016e-11	1.80118e-09	Hacd1
Hand	96.4481	-2.41793	0.364837	-6.62743	3.41578e-11	1.82915e-09	Hand
hoe1	423.936	1.66182	0.251293	6.61307	3.7643e-11	2.00778e-09	hoe1
CG14564	551.83	-10.6764	1.6168	-6.60341	4.01806e-11	2.13466e-09	CG14564
CG16904	89.3033	-3.79239	0.574656	-6.59941	4.1281e-11	2.18448e-09	CG16904
nahoda	2788.94	-1.54516	0.234172	-6.5984	4.15626e-11	2.19076e-09	nahoda
CG6739	430.695	-1.60279	0.243154	-6.59168	4.34879e-11	2.2744e-09	CG6739
hfp	1130.13	1.48458	0.22522	6.59169	4.34857e-11	2.2744e-09	hfp
in	64.9306	-2.74974	0.417565	-6.58519	4.54309e-11	2.36681e-09	in
l(2)k09913	908.644	1.18432	0.180054	6.57759	4.78121e-11	2.48125e-09	l(2)k09913
CG11585	38.9161	-5.91795	0.89985	-6.57659	4.81352e-11	2.48841e-09	CG11585
CG10512	1361.2	1.61718	0.245971	6.57468	4.87567e-11	2.51088e-09	CG10512
5.8SrRNA-Psi:CR45854	734.746	1.75038	0.26632	6.57247	4.94861e-11	2.53871e-09	5.8SrRNA-Psi:CR45854
CG42500	1109.57	8.73353	1.3297	6.56803	5.09842e-11	2.60562e-09	CG42500
Dhit	851.655	1.1916	0.18148	6.56603	5.16729e-11	2.63082e-09	Dhit
CG11413	118.973	-3.92523	0.597995	-6.56399	5.23862e-11	2.65707e-09	CG11413
emp	1715.71	-1.26928	0.19452	-6.52517	6.79252e-11	3.43227e-09	emp
l(2)efl	8742.74	1.91265	0.29315	6.52448	6.82389e-11	3.4352e-09	l(2)efl
CG5810	1313.67	-2.73511	0.419342	-6.52238	6.92018e-11	3.47068e-09	CG5810
CG42329	405.703	-4.05658	0.623042	-6.51092	7.46933e-11	3.73216e-09	CG42329
Arc1	8475.13	1.48107	0.227518	6.50966	7.53199e-11	3.74954e-09	Arc1
Kcmf1	730.101	1.0371	0.159531	6.50092	7.98279e-11	3.95929e-09	Kcmf1
CG8630	2363.9	-2.62905	0.40551	-6.48332	8.97237e-11	4.43374e-09	CG8630
PGRP-SA	126.201	2.01312	0.310687	6.47956	9.19902e-11	4.52909e-09	PGRP-SA
CG32813	372.069	1.24585	0.192579	6.4693	9.84551e-11	4.82969e-09	CG32813
CG13227	72.37	-5.23376	0.81029	-6.45912	1.05317e-10	5.1475e-09	CG13227
CG12826	542.594	-2.68925	0.416488	-6.45698	1.06814e-10	5.20175e-09	CG12826
sals	3019.53	1.32183	0.20532	6.43791	1.21128e-10	5.87753e-09	sals
Nnp-1	260.065	-1.53733	0.239176	-6.4276	1.29631e-10	6.24686e-09	Nnp-1
CG6845	217.093	1.70236	0.264854	6.42756	1.29668e-10	6.24686e-09	CG6845
Cht6	10364.7	-2.05839	0.320533	-6.42176	1.34707e-10	6.46639e-09	Cht6
Cad96Ca	617.786	-1.35975	0.211859	-6.41819	1.37908e-10	6.59651e-09	Cad96Ca
CG13177	938.096	1.677	0.261525	6.41239	1.43256e-10	6.82801e-09	CG13177
f	100.665	-4.49008	0.701353	-6.40202	1.53333e-10	7.28251e-09	f
sqa	1523.23	1.19975	0.187592	6.39551	1.60011e-10	7.57293e-09	sqa
Adat1	2518.57	1.42016	0.222227	6.39058	1.65257e-10	7.79376e-09	Adat1
CG9698	60.9468	-6.95973	1.08921	-6.38973	1.66177e-10	7.80974e-09	CG9698
Cpr49Ad	26.8178	-8.47039	1.32575	-6.38911	1.66851e-10	7.81407e-09	Cpr49Ad
CG10077	6128.29	1.57584	0.246694	6.38785	1.68229e-10	7.85129e-09	CG10077
asRNA:CR45713	809.37	-5.75663	0.90152	-6.38548	1.70863e-10	7.94663e-09	asRNA:CR45713
CG14572	255.542	-3.19785	0.501403	-6.3778	1.79645e-10	8.32625e-09	CG14572
CG13051	629.247	-8.84706	1.38747	-6.37641	1.81291e-10	8.35265e-09	CG13051
CG1113	38.0497	3.63881	0.570681	6.37627	1.81458e-10	8.35265e-09	CG1113
CG31601	41.7882	4.03251	0.63336	6.36686	1.9294e-10	8.85088e-09	CG31601
NT1	85.4935	-4.92574	0.774871	-6.35685	2.05938e-10	9.41501e-09	NT1
CG11777	422.154	1.39432	0.219376	6.35583	2.07301e-10	9.44521e-09	CG11777
CG13024	226.913	-2.02953	0.320047	-6.34136	2.27745e-10	1.03416e-08	CG13024
CG7406	416.616	-7.99981	1.26585	-6.31971	2.62055e-10	1.18441e-08	CG7406
CG14570	49.9318	-4.70012	0.743761	-6.31939	2.62596e-10	1.18441e-08	CG14570
aos	199.307	-1.88958	0.299075	-6.31808	2.64833e-10	1.19051e-08	aos
CG5087	317.306	1.35949	0.215225	6.31659	2.67402e-10	1.19805e-08	CG5087
tfc	342.101	-2.8011	0.444048	-6.30811	2.82459e-10	1.26131e-08	tfc
Pen	239.629	2.94653	0.467526	6.30239	2.93084e-10	1.30442e-08	Pen
CG13847	54.94	-5.30453	0.842477	-6.29635	3.04731e-10	1.35178e-08	CG13847
EDTP	557.671	1.04018	0.165326	6.2917	3.14015e-10	1.38838e-08	EDTP
CG43667	43.6059	-9.29213	1.47834	-6.28552	3.26749e-10	1.43995e-08	CG43667
lncRNA:CR44407	25.6774	8.65441	1.37796	6.28059	3.37289e-10	1.48154e-08	lncRNA:CR44407
CG33229	2776.1	1.37375	0.219063	6.27101	3.58718e-10	1.57053e-08	CG33229
dsx-c73A	117.137	-5.96084	0.952297	-6.25943	3.86383e-10	1.68616e-08	dsx-c73A
CG30349	255.171	-1.29228	0.206565	-6.25604	3.94867e-10	1.71761e-08	CG30349
CG44666	200.243	-11.5028	1.8394	-6.25352	4.01301e-10	1.73996e-08	CG44666
CG9649	73.2344	-2.57676	0.412329	-6.2493	4.12302e-10	1.78191e-08	CG9649
norpA	824.232	1.59591	0.2558	6.2389	4.40652e-10	1.89834e-08	norpA
mod(mdg4)	1252.88	0.962804	0.154407	6.2355	4.50344e-10	1.93303e-08	mod(mdg4)
CG8736	253.08	2.54172	0.40765	6.23507	4.51581e-10	1.93303e-08	CG8736
CG34458	26.0565	-8.57432	1.37663	-6.22847	4.71004e-10	2.00362e-08	CG34458
BomS1	33.6392	4.58711	0.736477	6.22846	4.71054e-10	2.00362e-08	BomS1
l(2)09851	202.699	-1.31624	0.211383	-6.22682	4.7599e-10	2.01823e-08	l(2)09851
Mcr	1399.18	-1.02499	0.164791	-6.21992	4.97419e-10	2.10245e-08	Mcr
CG9593	64.2712	-2.57018	0.413687	-6.21287	5.20263e-10	2.19212e-08	CG9593
CG12964	269.558	-3.78475	0.610566	-6.19875	5.6914e-10	2.39056e-08	CG12964
lncRNA:CR45664	25.9523	-8.5389	1.37856	-6.19408	5.86259e-10	2.4548e-08	lncRNA:CR45664
CG4896	349.506	1.14681	0.185596	6.17907	6.44795e-10	2.69152e-08	CG4896
SPH93	191.665	2.56615	0.417244	6.15025	7.73596e-10	3.21917e-08	SPH93
CG44245	26538.1	1.57102	0.25573	6.14327	8.08397e-10	3.3536e-08	CG44245
ZnT35C	43.3474	3.35602	0.546345	6.14268	8.11401e-10	3.3557e-08	ZnT35C
CG9265	1928.63	-1.65905	0.270112	-6.14211	8.14329e-10	3.35749e-08	CG9265
CG11200	137.622	-2.38884	0.390178	-6.12243	9.21584e-10	3.78571e-08	CG11200
CG4020	322.451	-2.27632	0.371843	-6.12173	9.25642e-10	3.78571e-08	CG4020
CG4000	46.259	7.10286	1.1603	6.12156	9.2664e-10	3.78571e-08	CG4000
CG42324	238.445	2.30269	0.376257	6.11999	9.35787e-10	3.81149e-08	CG42324
CG31103	329.461	-2.73196	0.446459	-6.11918	9.40591e-10	3.81948e-08	CG31103
CG13731	68934.2	-2.89463	0.473363	-6.11502	9.65434e-10	3.89682e-08	CG13731
CAH1	2959.01	1.25056	0.204493	6.1154	9.63166e-10	3.89682e-08	CAH1
su(w[a])	1632.41	1.57197	0.257498	6.1048	1.02932e-09	4.14223e-08	su(w[a])
CG34165	294.324	-2.83055	0.464564	-6.09292	1.10869e-09	4.42194e-08	CG34165
CG8303	419.993	-1.5751	0.258493	-6.09339	1.10547e-09	4.42194e-08	CG8303
2SrRNA-Psi:CR40677	1114.39	1.76027	0.288873	6.09358	1.10412e-09	4.42194e-08	2SrRNA-Psi:CR40677
CG8854	144.556	-2.08784	0.343778	-6.07322	1.2537e-09	4.98551e-08	CG8854
MtnA	171.528	2.19881	0.362474	6.06612	1.31041e-09	5.18035e-08	MtnA
TotA	60.869	6.73216	1.10976	6.06632	1.30878e-09	5.18035e-08	TotA
dyl	253.25	-4.95691	0.817619	-6.06262	1.33925e-09	5.27885e-08	dyl
lncRNA:CR45372	31.7999	3.52833	0.582292	6.05938	1.36647e-09	5.37038e-08	lncRNA:CR45372
Rbp1-like	1146.96	1.63097	0.269451	6.05293	1.42238e-09	5.57384e-08	Rbp1-like
CG31371	77.0211	-4.86681	0.804967	-6.04597	1.48512e-09	5.80278e-08	CG31371
CG14696	278.112	-1.95448	0.323494	-6.04177	1.52435e-09	5.93877e-08	CG14696
dbr	576.692	1.02132	0.16912	6.03906	1.55011e-09	6.02169e-08	dbr
Ugt50B3	216.638	-2.29321	0.379769	-6.03842	1.55629e-09	6.02828e-08	Ugt50B3
NFAT	2906.6	1.64467	0.272434	6.03696	1.57045e-09	6.06563e-08	NFAT
CG31313	1599.16	1.4856	0.246421	6.02871	1.65278e-09	6.36532e-08	CG31313
Tsr1	504.404	-1.01874	0.168998	-6.02811	1.65892e-09	6.37072e-08	Tsr1
CG13041	29.0427	-6.32297	1.05024	-6.02052	1.73853e-09	6.65743e-08	CG13041
PyK	16977.4	1.16053	0.192879	6.01686	1.77835e-09	6.79056e-08	PyK
CG6959	461.531	-1.38445	0.230283	-6.01194	1.83321e-09	6.9712e-08	CG6959
wnd	608.891	-1.07843	0.179389	-6.01169	1.83603e-09	6.9712e-08	wnd
exp	1279.73	-0.986563	0.164276	-6.00551	1.90736e-09	7.22163e-08	exp
IleRS	1176.91	-0.985919	0.16426	-6.00218	1.94684e-09	7.35041e-08	IleRS
asRNA:CR45663	28.5547	-6.2978	1.04958	-6.0003	1.96955e-09	7.41532e-08	asRNA:CR45663
CG11437	57.0356	-3.45915	0.57665	-5.9987	1.98898e-09	7.46756e-08	CG11437
nop5	503.059	-1.17828	0.19692	-5.98355	2.18329e-09	8.17428e-08	nop5
CG8306	1388.05	-1.44669	0.241983	-5.9785	2.25206e-09	8.4083e-08	CG8306
CG32213	32.7027	-8.90733	1.49185	-5.97067	2.36283e-09	8.79744e-08	CG32213
sosie	261.377	-1.88441	0.315928	-5.96469	2.45097e-09	9.1004e-08	sosie
pirk	102.925	-2.49858	0.419596	-5.95474	2.60478e-09	9.64486e-08	pirk
pre-mod(mdg4)-N	161.095	1.70336	0.286173	5.95222	2.64533e-09	9.71473e-08	pre-mod(mdg4)-N
pre-mod(mdg4)-O	161.095	1.70336	0.286173	5.95222	2.64533e-09	9.71473e-08	pre-mod(mdg4)-O
pre-mod(mdg4)-AA	161.095	1.70336	0.286173	5.95222	2.64533e-09	9.71473e-08	pre-mod(mdg4)-AA
CG1213	247.549	-3.40857	0.573417	-5.9443	2.77634e-09	1.0168e-07	CG1213
CG15547	292.343	1.42699	0.240388	5.93618	2.9174e-09	1.06557e-07	CG15547
CG13640	314.121	-3.0057	0.506612	-5.93294	2.97561e-09	1.08388e-07	CG13640
CG11076	406.809	-1.07635	0.181576	-5.92779	3.07044e-09	1.1154e-07	CG11076
CG14439	999.819	-1.84205	0.311008	-5.92284	3.16435e-09	1.14641e-07	CG14439
CG14095	27.7922	-7.68392	1.29762	-5.92153	3.18968e-09	1.15249e-07	CG14095
CG13678	428.218	-3.0241	0.510948	-5.9186	3.24696e-09	1.17004e-07	CG13678
l(3)72Dr	34.9384	5.8037	0.981722	5.91175	3.38487e-09	1.21647e-07	l(3)72Dr
CG13784	989.031	-1.14464	0.193775	-5.90707	3.48237e-09	1.24817e-07	CG13784
CG9812	1179.54	-1.512	0.256348	-5.89824	3.67393e-09	1.30985e-07	CG9812
St3	2168.06	1.85841	0.31507	5.89839	3.67065e-09	1.30985e-07	St3
CG13699	85.412	-4.70414	0.797791	-5.89645	3.71397e-09	1.32062e-07	CG13699
PH4alphaNE1	118.028	-2.38416	0.40536	-5.88157	4.06384e-09	1.44121e-07	PH4alphaNE1
CG6660	147.823	-2.11032	0.358982	-5.87864	4.13647e-09	1.46311e-07	CG6660
nompA	71.2526	-3.67513	0.625247	-5.87788	4.15549e-09	1.46598e-07	nompA
CG13068	209.525	-9.77554	1.66903	-5.857	4.71295e-09	1.65829e-07	CG13068
CG13722	1904.06	-3.31904	0.567478	-5.84875	4.95274e-09	1.73811e-07	CG13722
CG5687	307.275	-1.12095	0.191859	-5.84258	5.13996e-09	1.79445e-07	CG5687
CG46523	307.275	-1.12095	0.191859	-5.84258	5.13996e-09	1.79445e-07	CG46523
CG13096	303.399	-1.38151	0.236588	-5.83931	5.2418e-09	1.82075e-07	CG13096
rudhira	3982.12	1.30656	0.223753	5.83929	5.24239e-09	1.82075e-07	rudhira
grh	2772.35	-1.09242	0.18712	-5.83806	5.28117e-09	1.82949e-07	grh
CG2972	195.794	-1.34312	0.230181	-5.83507	5.37679e-09	1.85783e-07	CG2972
CG9287	57.4943	-5.52566	0.947096	-5.83433	5.40082e-09	1.86134e-07	CG9287
CG7220	1211.59	0.955111	0.163822	5.83019	5.53656e-09	1.90325e-07	CG7220
Hsp70Ab	224.74	-4.74175	0.815542	-5.81424	6.09116e-09	2.08855e-07	Hsp70Ab
CG4213	1437.26	1.00058	0.172108	5.81364	6.11304e-09	2.09072e-07	CG4213
CG5535	322.938	-1.68109	0.28971	-5.80267	6.52672e-09	2.22654e-07	CG5535
CG5863	66.835	-4.12724	0.711989	-5.79677	6.76038e-09	2.30041e-07	CG5863
CanA1	937.991	1.33163	0.229787	5.79506	6.82971e-09	2.31813e-07	CanA1
CG11147	327.111	-1.73301	0.299118	-5.79372	6.88425e-09	2.33076e-07	CG11147
CG11409	164.052	-2.8606	0.494521	-5.78458	7.2694e-09	2.45498e-07	CG11409
lncRNA:CR44691	92.2296	-2.0184	0.349138	-5.7811	7.42155e-09	2.50008e-07	lncRNA:CR44691
Lip2	60.5247	3.85346	0.667175	5.77578	7.65974e-09	2.57386e-07	Lip2
Hsp68	3663.68	-2.46611	0.427066	-5.77453	7.71666e-09	2.58009e-07	Hsp68
CG15530	53.8202	2.56179	0.443622	5.77472	7.70825e-09	2.58009e-07	CG15530
TwdlS	71.7433	-9.07083	1.57095	-5.77411	7.73603e-09	2.58015e-07	TwdlS
vir-1	4574.19	-2.05867	0.356584	-5.77332	7.7724e-09	2.58586e-07	vir-1
CG43666	530.355	-11.9611	2.07418	-5.76666	8.08572e-09	2.68346e-07	CG43666
asRNA:CR45270	539.388	1.07181	0.18588	5.76612	8.11195e-09	2.68554e-07	asRNA:CR45270
CG13618	172.21	-3.15447	0.547268	-5.76403	8.21302e-09	2.71231e-07	CG13618
Lcp1	9244.93	5.55555	0.963948	5.76334	8.24673e-09	2.71677e-07	Lcp1
CG14257	80.0721	-6.05329	1.05042	-5.76274	8.27568e-09	2.71964e-07	CG14257
CG4911	963.642	1.45659	0.252789	5.76207	8.30884e-09	2.72388e-07	CG4911
CG42561	137.159	-2.2152	0.384657	-5.7589	8.46623e-09	2.76873e-07	CG42561
Tg	764.307	-1.33672	0.232493	-5.74952	8.94947e-09	2.91966e-07	Tg
CG3164	1787.88	-1.21509	0.211406	-5.74768	9.04776e-09	2.94457e-07	CG3164
yellow-e	479.971	1.65114	0.287441	5.74428	9.23109e-09	2.99698e-07	yellow-e
lncRNA:CR44999	776.044	-1.79373	0.312737	-5.7356	9.71696e-09	3.14712e-07	lncRNA:CR44999
CG14695	84.8452	2.3729	0.413843	5.7338	9.82028e-09	3.17294e-07	CG14695
CG15531	402.062	-1.87453	0.327033	-5.73191	9.93032e-09	3.2008e-07	CG15531
CG14418	478.334	-8.63265	1.50635	-5.73083	9.99398e-09	3.21362e-07	CG14418
CG6472	37.0528	-3.2365	0.565029	-5.72802	1.01612e-08	3.25957e-07	CG6472
Osi9	358.989	-6.46465	1.13022	-5.71984	1.06625e-08	3.4077e-07	Osi9
Act5C	16777.5	-1.03078	0.180217	-5.71966	1.06736e-08	3.4077e-07	Act5C
CG8939	296.018	-1.53807	0.269087	-5.7159	1.09123e-08	3.47566e-07	CG8939
CG31115	20.2869	3.50043	0.613029	5.71005	1.12943e-08	3.58881e-07	CG31115
Cyp4p2	122.528	-2.4248	0.425077	-5.70437	1.16774e-08	3.70179e-07	Cyp4p2
Nopp140	622.839	-1.58315	0.277972	-5.69536	1.23113e-08	3.89354e-07	Nopp140
CG14111	68.2099	-6.4583	1.13457	-5.6923	1.25337e-08	3.94788e-07	CG14111
CG11529	574.197	-2.56725	0.451013	-5.69219	1.25418e-08	3.94788e-07	CG11529
CG9717	576.314	-1.64862	0.290264	-5.67972	1.34914e-08	4.23688e-07	CG9717
CG3961	1262.7	1.36931	0.241438	5.67147	1.41575e-08	4.43569e-07	CG3961
CG10407	161.903	1.60173	0.282471	5.67043	1.42439e-08	4.45238e-07	CG10407
DnaJ-1	2058.24	-3.30705	0.583431	-5.66827	1.44245e-08	4.49837e-07	DnaJ-1
CG5070	1267.61	1.51652	0.267566	5.66783	1.44619e-08	4.49959e-07	CG5070
CG4622	271.211	-1.57485	0.277921	-5.66653	1.4572e-08	4.52338e-07	CG4622
CG3168	2793.68	1.17146	0.207024	5.65854	1.52666e-08	4.72806e-07	CG3168
asRNA:CR46128	380.729	1.42886	0.252646	5.65558	1.55323e-08	4.79931e-07	asRNA:CR46128
Amnionless	46.0856	-3.58547	0.634169	-5.65381	1.5693e-08	4.83784e-07	Amnionless
Polr1E	129.669	-1.38505	0.245257	-5.64733	1.6296e-08	5.01224e-07	Polr1E
CG8036	1679.78	-1.54802	0.27434	-5.64272	1.67385e-08	5.13659e-07	CG8036
capt	2136.29	0.915041	0.162417	5.6339	1.7618e-08	5.39417e-07	capt
CG1136	313.103	-1.73012	0.307213	-5.63166	1.78487e-08	5.45237e-07	CG1136
Cpr97Ea	186.244	1.59189	0.283374	5.61763	1.93596e-08	5.90052e-07	Cpr97Ea
Obp99d	97.1983	-3.67801	0.654838	-5.61667	1.9467e-08	5.91983e-07	Obp99d
CG15740	110.772	-5.93087	1.05735	-5.60919	2.03277e-08	6.16759e-07	CG15740
CG7900	323.84	-1.3479	0.240439	-5.60602	2.07038e-08	6.26755e-07	CG7900
asRNA:CR45891	45.2063	-2.59195	0.462396	-5.60548	2.07679e-08	6.27284e-07	asRNA:CR45891
Ns1	419.809	-1.25112	0.223273	-5.60355	2.10011e-08	6.32905e-07	Ns1
CG14245	158.248	2.3007	0.410775	5.60088	2.13263e-08	6.41267e-07	CG14245
pre-mod(mdg4)-B	359.053	1.20611	0.215414	5.59905	2.15532e-08	6.43769e-07	pre-mod(mdg4)-B
pre-mod(mdg4)-H	359.053	1.20611	0.215414	5.59905	2.15532e-08	6.43769e-07	pre-mod(mdg4)-H
pre-mod(mdg4)-G	359.053	1.20611	0.215414	5.59905	2.15532e-08	6.43769e-07	pre-mod(mdg4)-G
Atg18a	589.757	0.9173	0.16407	5.59089	2.25906e-08	6.73259e-07	Atg18a
CG14329	57.697	-8.73617	1.56615	-5.57813	2.43112e-08	7.22936e-07	CG14329
CG31871	48.8246	-4.56443	0.818569	-5.57611	2.4595e-08	7.28215e-07	CG31871
Cyp6v1	246.905	1.14144	0.204702	5.5761	2.45971e-08	7.28215e-07	Cyp6v1
CG1578	1216.24	1.11037	0.199156	5.57541	2.46953e-08	7.29516e-07	CG1578
AOX2	289.081	1.99414	0.35887	5.55672	2.74897e-08	8.10283e-07	AOX2
CG13226	106.643	-4.52156	0.81495	-5.54826	2.88522e-08	8.48584e-07	CG13226
Elovl7	1824.84	-1.60139	0.288715	-5.5466	2.91276e-08	8.54813e-07	Elovl7
CG12825	100.806	2.49331	0.450194	5.5383	3.05414e-08	8.94351e-07	CG12825
osy	301.758	-2.023	0.36544	-5.5358	3.0981e-08	9.03288e-07	osy
Sam-S	4336.75	-1.46075	0.263864	-5.53598	3.09489e-08	9.03288e-07	Sam-S
Ugt49B1	2697.07	1.73824	0.314027	5.53534	3.10634e-08	9.0373e-07	Ugt49B1
REG	761.003	-0.938939	0.169786	-5.53013	3.19987e-08	9.2893e-07	REG
CG15212	134.21	-3.71098	0.671401	-5.52721	3.25355e-08	9.42477e-07	CG15212
CG14573	101.712	-10.5354	1.90676	-5.52527	3.28988e-08	9.50952e-07	CG14573
QC	130.165	-1.67692	0.303589	-5.52365	3.32037e-08	9.57707e-07	QC
CG15080	123.295	-4.82726	0.877605	-5.50049	3.78733e-08	1.09005e-06	CG15080
CG5455	489.992	-1.42331	0.258902	-5.4975	3.85211e-08	1.10633e-06	CG5455
CG17549	3373.93	-1.26286	0.229854	-5.49419	3.925e-08	1.12247e-06	CG17549
LamC	2415.55	-0.993544	0.180823	-5.49456	3.91688e-08	1.12247e-06	LamC
Faa	898.7	-2.23245	0.406545	-5.49129	3.99009e-08	1.13866e-06	Faa
MED6	319.591	1.48655	0.270736	5.49078	4.00154e-08	1.13951e-06	MED6
Osi7	703.943	-6.52406	1.18939	-5.48523	4.12939e-08	1.17343e-06	Osi7
NimB4	76.5667	-2.27201	0.414595	-5.48007	4.25166e-08	1.20562e-06	NimB4
CG17032	2174.76	-1.75361	0.320056	-5.47906	4.27583e-08	1.20992e-06	CG17032
CG31321	911.557	-1.88245	0.343765	-5.47597	4.35126e-08	1.22868e-06	CG31321
CG14565	340.913	-9.59354	1.75489	-5.46673	4.58407e-08	1.29171e-06	CG14565
pbl	588.51	1.19831	0.219252	5.46543	4.61796e-08	1.29854e-06	pbl
CG14880	43.6941	-4.89938	0.89785	-5.45678	4.84836e-08	1.36027e-06	CG14880
CG14258	867.401	2.65094	0.485837	5.45644	4.85775e-08	1.36027e-06	CG14258
alpha-Est3	346.486	1.35421	0.248588	5.4476	5.10535e-08	1.42663e-06	alpha-Est3
CngA	71.9224	-3.11293	0.571775	-5.44432	5.20033e-08	1.45016e-06	CngA
dmGlut	510.883	-1.94903	0.358332	-5.43918	5.35261e-08	1.48953e-06	dmGlut
PIG-X	60.6585	2.54803	0.468864	5.43447	5.49599e-08	1.52627e-06	PIG-X
CG8100	68.1944	3.03384	0.558908	5.42815	5.69403e-08	1.57801e-06	CG8100
CG33120	69.5417	3.0004	0.55291	5.42656	5.74505e-08	1.58887e-06	CG33120
Ada2b	352.569	1.00551	0.185412	5.42312	5.85668e-08	1.61642e-06	Ada2b
teq	275.438	2.78592	0.513888	5.42127	5.91773e-08	1.62992e-06	teq
CG34296	64.3255	-7.66988	1.41526	-5.4194	5.98005e-08	1.64372e-06	CG34296
Cralbp	280.446	-1.95628	0.36108	-5.41785	6.03189e-08	1.65459e-06	Cralbp
flap	2523.74	-1.27626	0.235601	-5.41704	6.05945e-08	1.65876e-06	flap
Rbm13	131.968	-1.47423	0.272213	-5.41573	6.10407e-08	1.66758e-06	Rbm13
AttB	73.8654	2.41177	0.446362	5.40317	6.54734e-08	1.78505e-06	AttB
Art3	165.019	-1.41934	0.2629	-5.39876	6.71041e-08	1.82211e-06	Art3
CG7320	34.3911	7.11774	1.3184	5.39879	6.70923e-08	1.82211e-06	CG7320
obst-B	1158.69	-1.22821	0.227525	-5.39812	6.73431e-08	1.82492e-06	obst-B
CG4806	262.698	-1.44429	0.267706	-5.39506	6.85002e-08	1.85254e-06	CG4806
CG8399	1094.49	-1.03207	0.191588	-5.38694	7.1669e-08	1.93434e-06	CG8399
Obp99c	160.824	3.12408	0.579984	5.38649	7.18463e-08	1.93524e-06	Obp99c
Fst	4731.91	2.58588	0.480345	5.38337	7.31051e-08	1.96521e-06	Fst
CalpA	2463.57	-1.20051	0.223417	-5.37342	7.72586e-08	2.07272e-06	CalpA
CG13311	463.767	1.78085	0.33145	5.37292	7.74717e-08	2.0743e-06	CG13311
Spn42De	172.953	-1.99182	0.370839	-5.37111	7.82545e-08	2.09109e-06	Spn42De
CG2233	1456	2.57367	0.479491	5.36751	7.98312e-08	2.12899e-06	CG2233
CG42305	4513.23	-2.65016	0.494552	-5.35872	8.38157e-08	2.22642e-06	CG42305
CG17325	4513.23	-2.65016	0.494552	-5.35872	8.38157e-08	2.22642e-06	CG17325
CG42747	67.8466	-2.41662	0.451043	-5.35786	8.42146e-08	2.2326e-06	CG42747
CG30334	112.208	-2.96895	0.554212	-5.35707	8.45843e-08	2.23337e-06	CG30334
CG8012	67.4261	-1.82273	0.340268	-5.35676	8.47264e-08	2.23337e-06	CG8012
pio	2689.06	-0.739225	0.137999	-5.35673	8.47419e-08	2.23337e-06	pio
CG33521	6157.95	1.67729	0.313818	5.34478	9.05283e-08	2.3812e-06	CG33521
CBP	1517.74	-1.56433	0.292973	-5.33949	9.32062e-08	2.44685e-06	CBP
CG5731	216.203	-2.21435	0.415051	-5.33513	9.54753e-08	2.50153e-06	CG5731
Hsp70Bb	495.491	-5.65508	1.06025	-5.33372	9.62221e-08	2.51619e-06	Hsp70Bb
sas	3081.07	-1.33564	0.250508	-5.33171	9.72915e-08	2.53921e-06	sas
asRNA:CR45969	318.787	-1.11769	0.209832	-5.3266	1.00068e-07	2.6033e-06	asRNA:CR45969
CG46429	1270.16	0.955725	0.179429	5.32648	1.00134e-07	2.6033e-06	CG46429
CG13982	108.211	1.77112	0.332559	5.32572	1.00553e-07	2.60912e-06	CG13982
CG4914	128.548	-4.8337	0.908086	-5.32296	1.02092e-07	2.64397e-06	CG4914
CG12325	127.203	-1.58525	0.298032	-5.31904	1.04316e-07	2.69636e-06	CG12325
CG1640	3382.77	0.937305	0.176475	5.31128	1.08859e-07	2.8084e-06	CG1640
NHP2	159.365	-1.92685	0.362977	-5.30847	1.10548e-07	2.84564e-06	NHP2
Pgant1	1634.53	-1.21306	0.228526	-5.30818	1.10726e-07	2.84564e-06	Pgant1
CG13893	409.25	-1.1747	0.221424	-5.30519	1.12556e-07	2.88715e-06	CG13893
CG6426	949.064	-1.52105	0.286873	-5.30217	1.14433e-07	2.92969e-06	CG6426
asRNA:CR46129	66.3865	2.28324	0.43073	5.30085	1.15263e-07	2.94534e-06	asRNA:CR46129
Osi6	854.545	-6.56503	1.23891	-5.29902	1.16427e-07	2.96944e-06	Osi6
CG17224	203.679	1.55154	0.292836	5.29834	1.16861e-07	2.97485e-06	CG17224
RpLP0-like	238.795	-1.46167	0.276178	-5.29247	1.20678e-07	3.06621e-06	RpLP0-like
CG14096	20.2641	-8.18796	1.54801	-5.28933	1.22766e-07	3.1134e-06	CG14096
CG30008	194.971	-2.64725	0.500778	-5.28628	1.24831e-07	3.15981e-06	CG30008
su(r)	769.929	-1.14367	0.21651	-5.28231	1.27568e-07	3.22301e-06	su(r)
CG6763	138.261	-3.52579	0.667579	-5.28146	1.28157e-07	3.23182e-06	CG6763
Ipk1	178.842	1.28452	0.243237	5.28093	1.28532e-07	3.2352e-06	Ipk1
GstD2	75.7641	2.25942	0.428213	5.2764	1.31745e-07	3.30987e-06	GstD2
CG5114	124.848	-1.52446	0.288982	-5.27528	1.32554e-07	3.32398e-06	CG5114
CG3546	362.835	-12.3756	2.34626	-5.27464	1.33019e-07	3.32926e-06	CG3546
Elk	222.327	1.5319	0.290445	5.27431	1.3326e-07	3.32926e-06	Elk
Ate1	273.523	1.05917	0.200844	5.27361	1.3377e-07	3.3358e-06	Ate1
FER	1316.55	0.897539	0.170257	5.27166	1.35192e-07	3.35882e-06	FER
Lerp	288.743	1.72253	0.326737	5.27191	1.35012e-07	3.35882e-06	Lerp
Gs2	4820.09	-1.19677	0.227131	-5.2691	1.37097e-07	3.39985e-06	Gs2
CG6700	1422.84	1.24905	0.237335	5.2628	1.41878e-07	3.51194e-06	CG6700
CG4887	540.034	1.14017	0.216737	5.26064	1.43555e-07	3.54691e-06	CG4887
Zip71B	342.757	1.78039	0.338645	5.2574	1.46105e-07	3.60329e-06	Zip71B
Twdlbeta	174.123	-4.33904	0.826632	-5.24906	1.52881e-07	3.7635e-06	Twdlbeta
CG5177	15484.9	1.23556	0.235941	5.23671	1.63463e-07	4.01664e-06	CG5177
CG13674	313.227	-12.1504	2.32137	-5.23417	1.65731e-07	4.06494e-06	CG13674
asRNA:CR44910	72.3531	-2.0909	0.399627	-5.23212	1.67574e-07	4.10267e-06	asRNA:CR44910
CG5928	25.3034	-4.26913	0.817203	-5.22408	1.75024e-07	4.27726e-06	CG5928
ImpL1	461.33	-3.89044	0.744856	-5.22308	1.75973e-07	4.29266e-06	ImpL1
asRNA:CR44029	385.396	1.33402	0.25551	5.22101	1.7795e-07	4.33301e-06	asRNA:CR44029
CG5674	380.748	1.29235	0.247608	5.21935	1.79557e-07	4.36423e-06	CG5674
ich	116.447	-5.2218	1.00063	-5.21854	1.80343e-07	4.37542e-06	ich
CG32091	369.533	-1.02701	0.197023	-5.21265	1.86158e-07	4.50839e-06	CG32091
dsb	28.0416	-4.90778	0.942075	-5.20955	1.89304e-07	4.57632e-06	dsb
CG5973	1203.48	-0.75591	0.145283	-5.20302	1.96077e-07	4.73154e-06	CG5973
stg	144.51	1.86192	0.357897	5.20238	1.96757e-07	4.73945e-06	stg
CG9246	256.583	-1.23436	0.237329	-5.20104	1.98178e-07	4.76512e-06	CG9246
Cpr66D	79.2854	-4.29591	0.826189	-5.19966	1.9965e-07	4.79195e-06	Cpr66D
SelG	516.566	-1.62727	0.313017	-5.19865	2.00737e-07	4.80945e-06	SelG
Pfk	6571.08	1.14037	0.219388	5.19796	2.01487e-07	4.81885e-06	Pfk
CG15497	29.3233	-3.93166	0.756526	-5.197	2.02533e-07	4.83525e-06	CG15497
flz	180.377	-6.60268	1.27195	-5.191	2.09171e-07	4.98486e-06	flz
Sesn	1276.1	0.942528	0.181808	5.18418	2.16962e-07	5.1614e-06	Sesn
CG12268	321.11	-1.70629	0.329286	-5.18179	2.19769e-07	5.21893e-06	CG12268
CG14105	189.868	-2.60303	0.502784	-5.17722	2.25214e-07	5.33881e-06	CG14105
Peritrophin-A	939.941	-1.46832	0.283666	-5.17624	2.264e-07	5.35748e-06	Peritrophin-A
Cpr31A	33.5989	-5.27868	1.02031	-5.17362	2.29598e-07	5.42361e-06	Cpr31A
CG13048	48.7397	-8.50541	1.6443	-5.17266	2.30785e-07	5.44207e-06	CG13048
Mst77F	48.8382	4.18829	0.810076	5.17024	2.33788e-07	5.50323e-06	Mst77F
mat	1369.85	2.19324	0.424345	5.16854	2.35934e-07	5.54404e-06	mat
CG18294	21.703	-8.29844	1.60634	-5.16604	2.39102e-07	5.60868e-06	CG18294
qkr58E-1	367.856	1.21582	0.235669	5.159	2.48269e-07	5.81357e-06	qkr58E-1
CG2199	192.824	-1.25764	0.243834	-5.15776	2.49919e-07	5.84201e-06	CG2199
CG14089	110.08	-10.6437	2.06464	-5.15524	2.53302e-07	5.91081e-06	CG14089
CG15239	87.2924	-4.84119	0.939192	-5.15463	2.54138e-07	5.92006e-06	CG15239
CG8850	258.687	1.48508	0.288141	5.154	2.54993e-07	5.92088e-06	CG8850
br	2948.78	2.7619	0.53588	5.15395	2.55055e-07	5.92088e-06	br
CG13069	260.277	-8.04162	1.56209	-5.148	2.63274e-07	6.10115e-06	CG13069
CG30389	773.161	1.10217	0.214165	5.14636	2.65591e-07	6.14426e-06	CG30389
CG32137	1146.76	-0.779263	0.15145	-5.14536	2.67003e-07	6.16631e-06	CG32137
Mlp84B	24729.8	1.20687	0.234593	5.14452	2.6821e-07	6.18354e-06	Mlp84B
CG17108	109.359	1.85973	0.361871	5.13922	2.75885e-07	6.34961e-06	CG17108
Surf6	125.633	-1.39767	0.272519	-5.12871	2.91738e-07	6.69193e-06	Surf6
tau	540.798	-1.21335	0.236581	-5.1287	2.91755e-07	6.69193e-06	tau
CG17752	581.006	2.29113	0.446783	5.12807	2.92726e-07	6.70277e-06	CG17752
Cdk2	224.399	-3.4054	0.664142	-5.12752	2.93585e-07	6.71101e-06	Cdk2
CG31550	595.435	1.00096	0.195433	5.12174	3.02724e-07	6.90818e-06	CG31550
CG13066	377.33	-9.91164	1.93544	-5.12113	3.03707e-07	6.91885e-06	CG13066
scf	663.273	-1.07352	0.209668	-5.12011	3.05351e-07	6.94454e-06	scf
KCNQ	527.529	1.63026	0.318768	5.11426	3.1498e-07	7.15144e-06	KCNQ
Cyp318a1	29.9518	-3.06891	0.601273	-5.10402	3.32521e-07	7.53695e-06	Cyp318a1
p24-2	254.818	1.59718	0.313089	5.10135	3.37238e-07	7.631e-06	p24-2
CG13679	101.511	-9.57148	1.87832	-5.09578	3.47308e-07	7.83497e-06	CG13679
retm	297.298	1.14685	0.225061	5.09572	3.47418e-07	7.83497e-06	retm
h	2703.09	-1.25288	0.245929	-5.09446	3.49731e-07	7.87393e-06	h
Qsox2	434.482	-1.74127	0.341972	-5.09186	3.54561e-07	7.96932e-06	Qsox2
Mdh1	4509.08	1.34415	0.264095	5.08963	3.58769e-07	8.05045e-06	Mdh1
Spn47C	607.263	-1.31565	0.258662	-5.08639	3.64948e-07	8.17231e-06	Spn47C
Cyp9b2	214.373	1.87146	0.367976	5.08583	3.66024e-07	8.17231e-06	Cyp9b2
lncRNA:CR43836	326.195	2.27814	0.447937	5.08584	3.66011e-07	8.17231e-06	lncRNA:CR43836
CG5541	587.686	0.998893	0.196725	5.07761	3.82211e-07	8.51957e-06	CG5541
CG13748	208.702	-2.49884	0.49237	-5.07512	3.87244e-07	8.61746e-06	CG13748
Pop2	406.566	0.773051	0.152521	5.06848	4.01009e-07	8.90902e-06	Pop2
brwl	443.345	1.38921	0.274367	5.06331	4.12039e-07	9.13897e-06	brwl
CG5181	1055.42	1.35008	0.266692	5.06231	4.14214e-07	9.17209e-06	CG5181
CG34248	16.2145	-7.76051	1.53406	-5.05882	4.21869e-07	9.32623e-06	CG34248
Non1	6219.23	-1.17628	0.232553	-5.05813	4.23389e-07	9.34446e-06	Non1
asRNA:CR44981	444.198	1.58391	0.313716	5.04887	4.44432e-07	9.7928e-06	asRNA:CR44981
Fkbp39	484.037	-1.18094	0.234388	-5.0384	4.69441e-07	1.03269e-05	Fkbp39
out	236.991	-1.46068	0.289961	-5.03751	4.71631e-07	1.03413e-05	out
asRNA:CR45167	239.357	1.20307	0.238814	5.0377	4.71164e-07	1.03413e-05	asRNA:CR45167
asRNA:CR46047	21.9119	-8.30368	1.64966	-5.03358	4.81409e-07	1.05385e-05	asRNA:CR46047
CG42749	161.158	-3.47254	0.690167	-5.03145	4.86775e-07	1.06386e-05	CG42749
Cyp4d2	180.373	1.32517	0.263462	5.02985	4.90868e-07	1.06933e-05	Cyp4d2
GLS	1193.95	1.34524	0.267442	5.03001	4.90466e-07	1.06933e-05	GLS
CG10232	112.345	-1.79972	0.357855	-5.02919	4.9255e-07	1.07126e-05	CG10232
pre-lola-G	165.624	1.8489	0.367676	5.02861	4.94054e-07	1.07279e-05	pre-lola-G
Tsen15	257.074	1.14292	0.227491	5.02401	5.06026e-07	1.09701e-05	Tsen15
CG4842	90.4981	-2.74812	0.547223	-5.02193	5.11542e-07	1.10719e-05	CG4842
lncRNA:CR45361	117.468	1.98944	0.396206	5.02124	5.13402e-07	1.10943e-05	lncRNA:CR45361
CG4998	836.647	-5.1422	1.02475	-5.01802	5.22069e-07	1.12635e-05	CG4998
CG10562	21.49	-4.41936	0.880794	-5.01748	5.23542e-07	1.12771e-05	CG10562
CG45076	21804.1	1.04174	0.207636	5.01714	5.24465e-07	1.12789e-05	CG45076
CG9459	29.4201	-4.16745	0.831029	-5.01481	5.30859e-07	1.13982e-05	CG9459
Ald1	59224.3	1.32834	0.264962	5.01333	5.3496e-07	1.14679e-05	Ald1
Cyp4g15	84.8362	2.02244	0.403468	5.01264	5.36887e-07	1.14909e-05	Cyp4g15
Osi15	655.922	-7.91462	1.57988	-5.00963	5.4534e-07	1.16533e-05	Osi15
kumpel	1185.19	2.27043	0.453744	5.00378	5.62181e-07	1.19941e-05	kumpel
CG11836	110.644	-1.54963	0.309822	-5.00168	5.6834e-07	1.21063e-05	CG11836
DIP1	2448.36	1.24297	0.249009	4.99169	5.98543e-07	1.27295e-05	DIP1
Obp83g	524.934	-1.83449	0.367536	-4.99132	5.99682e-07	1.27335e-05	Obp83g
CG9689	147.856	-1.96269	0.39336	-4.98956	6.05161e-07	1.28296e-05	CG9689
asRNA:CR45807	266.334	-1.06057	0.212599	-4.98858	6.0825e-07	1.28748e-05	asRNA:CR45807
CG34202	526.19	-12.914	2.58944	-4.98716	6.12723e-07	1.29491e-05	CG34202
Cpr47Ed	48.5881	-7.12206	1.42818	-4.98681	6.13847e-07	1.29525e-05	Cpr47Ed
Osi19	271.03	-10.9943	2.21065	-4.97332	6.5815e-07	1.38438e-05	Osi19
CG4839	67.0995	2.37258	0.477045	4.97349	6.57596e-07	1.38438e-05	CG4839
CG14292	1145.2	1.82987	0.368047	4.97182	6.63258e-07	1.39294e-05	CG14292
CG12947	74.7011	-2.57246	0.517481	-4.97112	6.65656e-07	1.3958e-05	CG12947
CG14147	259.868	-6.86612	1.38166	-4.96946	6.71394e-07	1.40564e-05	CG14147
wrm2	470.121	-1.22521	0.246764	-4.9651	6.86659e-07	1.43313e-05	wrm2
wrm1	470.121	-1.22521	0.246764	-4.9651	6.86659e-07	1.43313e-05	wrm1
Mgat2	470.572	0.992444	0.200026	4.96158	6.99238e-07	1.45713e-05	Mgat2
peng	338.583	-0.975716	0.196863	-4.95631	7.18427e-07	1.4948e-05	peng
CG16762	702.943	1.5494	0.312902	4.95171	7.35626e-07	1.52821e-05	CG16762
CG5255	11.3611	-7.36505	1.48757	-4.95106	7.38093e-07	1.53097e-05	CG5255
CG13097	160.814	-1.1835	0.239079	-4.95025	7.41171e-07	1.53499e-05	CG13097
alpha-Est2	293.678	1.75854	0.355481	4.94693	7.53947e-07	1.55905e-05	alpha-Est2
CG14567	234.8	-1.88242	0.380699	-4.94464	7.62862e-07	1.57506e-05	CG14567
CG18563	127.872	2.87351	0.581276	4.94345	7.67513e-07	1.58223e-05	CG18563
CG12009	233.067	-6.35741	1.28872	-4.93313	8.09221e-07	1.66566e-05	CG12009
Cyp313a3	99.1124	-3.26719	0.662336	-4.93282	8.10511e-07	1.66576e-05	Cyp313a3
Tl	765.671	-0.959139	0.194645	-4.92763	8.32328e-07	1.70799e-05	Tl
Polr1B	148.146	-1.45159	0.294607	-4.9272	8.34184e-07	1.70919e-05	Polr1B
hh	61.0995	1.96414	0.398745	4.92581	8.40121e-07	1.71873e-05	hh
CG42598	65.6332	-2.23901	0.454945	-4.9215	8.5883e-07	1.75434e-05	CG42598
CG31999	2413.96	0.985541	0.200336	4.91945	8.67867e-07	1.77011e-05	CG31999
CG43333	140.236	-3.96078	0.805181	-4.91912	8.69363e-07	1.77047e-05	CG43333
asRNA:CR45525	121.831	-1.81411	0.368855	-4.91823	8.73298e-07	1.77579e-05	asRNA:CR45525
CG31268	208.743	-9.86063	2.00597	-4.91564	8.84939e-07	1.78864e-05	CG31268
CG12256	13.2523	-7.53299	1.53239	-4.91586	8.83934e-07	1.78864e-05	CG12256
asRNA:CR43477	13.2523	-7.53299	1.53239	-4.91586	8.83934e-07	1.78864e-05	asRNA:CR43477
CG14615	348.358	-1.49491	0.304113	-4.91564	8.84934e-07	1.78864e-05	CG14615
CG1806	142.822	-1.67421	0.340944	-4.91053	9.08298e-07	1.8331e-05	CG1806
Pgant4	105.401	2.45259	0.499496	4.91014	9.10118e-07	1.83402e-05	Pgant4
BomT3	93.096	2.63363	0.53643	4.90955	9.12867e-07	1.8368e-05	BomT3
Pdfr	100.7	2.31806	0.472705	4.90383	9.39865e-07	1.8883e-05	Pdfr
Fatp1	855.568	-1.00823	0.205628	-4.90316	9.43065e-07	1.8919e-05	Fatp1
CG42819	103.121	-3.48588	0.711032	-4.90256	9.45965e-07	1.89489e-05	CG42819
asRNA:CR44960	694.336	-2.12804	0.434348	-4.89938	9.61384e-07	1.92196e-05	asRNA:CR44960
asRNA:CR44690	210.613	1.29225	0.263768	4.89919	9.6234e-07	1.92196e-05	asRNA:CR44690
CG34038	121.844	-2.17736	0.444512	-4.89831	9.6664e-07	1.92483e-05	CG34038
Eip63F-1	1377.28	1.35915	0.277463	4.89848	9.65804e-07	1.92483e-05	Eip63F-1
CG17751	137.01	3.24682	0.663014	4.89706	9.7279e-07	1.93421e-05	CG17751
CG42390	5016.91	1.03745	0.21211	4.89109	1.0028e-06	1.98359e-05	CG42390
pre-mod(mdg4)-J	297.282	1.1586	0.236928	4.89008	1.00795e-06	1.98359e-05	pre-mod(mdg4)-J
pre-mod(mdg4)-K	297.282	1.1586	0.236928	4.89008	1.00795e-06	1.98359e-05	pre-mod(mdg4)-K
pre-mod(mdg4)-P	297.282	1.1586	0.236928	4.89008	1.00795e-06	1.98359e-05	pre-mod(mdg4)-P
pre-mod(mdg4)-L	297.282	1.1586	0.236928	4.89008	1.00795e-06	1.98359e-05	pre-mod(mdg4)-L
pre-mod(mdg4)-I	297.282	1.1586	0.236928	4.89008	1.00795e-06	1.98359e-05	pre-mod(mdg4)-I
Npc2g	57.5316	2.52254	0.515668	4.8918	9.99195e-07	1.98359e-05	Npc2g
CG33178	694.786	-2.1292	0.435453	-4.88963	1.01025e-06	1.9852e-05	CG33178
CG12519	29.269	-5.9782	1.22278	-4.88901	1.01345e-06	1.98857e-05	CG12519
CG34201	260.142	-10.1882	2.08439	-4.88786	1.01936e-06	1.99725e-05	CG34201
CG10341	148.046	-1.29783	0.265744	-4.88379	1.04068e-06	2.03606e-05	CG10341
Srxn	179.914	1.63232	0.334319	4.88252	1.04737e-06	2.04618e-05	Srxn
CR46406	25.9103	3.22086	0.660699	4.87492	1.08852e-06	2.12349e-05	CR46406
CG11380	148.864	-9.3579	1.92005	-4.87377	1.09488e-06	2.13151e-05	CG11380
CG10962	456.096	2.39063	0.490543	4.87344	1.09671e-06	2.13151e-05	CG10962
salto	87.8151	3.92172	0.804734	4.87332	1.09739e-06	2.13151e-05	salto
magu	419.985	1.12384	0.230643	4.87264	1.10117e-06	2.13576e-05	magu
Cpr11A	5403.61	-1.76098	0.361422	-4.87235	1.10276e-06	2.13576e-05	Cpr11A
CG1299	921.515	-0.96	0.197361	-4.8642	1.14923e-06	2.22256e-05	CG1299
Eno	26914	1.1021	0.226606	4.8635	1.15326e-06	2.22715e-05	Eno
CG13676	3597.91	-0.846814	0.174264	-4.85937	1.1776e-06	2.27088e-05	CG13676
CG18178	132.233	-1.62057	0.33388	-4.85374	1.21156e-06	2.33303e-05	CG18178
CG6805	618.409	-0.908652	0.187257	-4.85242	1.21964e-06	2.34524e-05	CG6805
tpr	75.7739	-4.66728	0.962857	-4.84733	1.25137e-06	2.40281e-05	tpr
Nepl9	231.38	1.92157	0.396474	4.84664	1.25571e-06	2.40771e-05	Nepl9
hbs	327.637	-1.37353	0.283458	-4.84564	1.26203e-06	2.41636e-05	hbs
lncRNA:CR43452	15.5607	7.32987	1.51343	4.84322	1.2775e-06	2.44252e-05	lncRNA:CR43452
l(3)80Fg	575.787	-1.15569	0.238723	-4.84113	1.29101e-06	2.46483e-05	l(3)80Fg
CG30203	57.8756	-2.04013	0.421487	-4.84031	1.29638e-06	2.46807e-05	CG30203
CG13607	140.746	2.87632	0.594217	4.84052	1.29497e-06	2.46807e-05	CG13607
CG10663	104.913	-1.6083	0.332347	-4.83921	1.30358e-06	2.47827e-05	CG10663
CG2260	82.3704	-1.33642	0.276211	-4.8384	1.30886e-06	2.48479e-05	CG2260
CG13186	10.8852	7.57338	1.5663	4.83519	1.33018e-06	2.52171e-05	CG13186
CG13157	44.9091	-5.65193	1.16903	-4.83474	1.33319e-06	2.52386e-05	CG13157
asRNA:CR44114	366.56	-1.06604	0.220742	-4.82934	1.36983e-06	2.58958e-05	asRNA:CR44114
CG33459	19.0979	5.69787	1.18316	4.81579	1.46616e-06	2.76779e-05	CG33459
CG8475	1667.14	0.86372	0.179389	4.81479	1.47355e-06	2.77783e-05	CG8475
PhKgamma	1287.27	0.989369	0.205513	4.81414	1.47839e-06	2.78305e-05	PhKgamma
Sfxn2	612.727	0.844243	0.175409	4.81299	1.48688e-06	2.79123e-05	Sfxn2
CG12237	234.728	0.906764	0.188391	4.81319	1.48541e-06	2.79123e-05	CG12237
CG30197	271.619	-1.69467	0.352196	-4.81172	1.49637e-06	2.80511e-05	CG30197
CG13627	44.3789	-6.59075	1.37018	-4.81014	1.50826e-06	2.81954e-05	CG13627
CG46316	44.3789	-6.59075	1.37018	-4.81014	1.50826e-06	2.81954e-05	CG46316
CG1416	639.005	-0.885241	0.184054	-4.80967	1.51178e-06	2.8222e-05	CG1416
CG8369	646.937	1.57236	0.326948	4.80921	1.51526e-06	2.82477e-05	CG8369
Hsp70Aa	198.36	-3.91463	0.814092	-4.80859	1.52001e-06	2.82971e-05	Hsp70Aa
asRNA:CR45886	41.737	-6.68268	1.38996	-4.80784	1.52573e-06	2.83641e-05	asRNA:CR45886
CngB	137.883	-1.86783	0.388657	-4.80586	1.54088e-06	2.86063e-05	CngB
CG5728	325.8	-1.25911	0.262145	-4.80311	1.5622e-06	2.89329e-05	CG5728
CR45033	59.0426	1.74479	0.363269	4.80304	1.56277e-06	2.89329e-05	CR45033
Rs1	283.586	-0.948799	0.197554	-4.80274	1.56507e-06	2.89354e-05	Rs1
CR33294	32.907	-2.00664	0.417874	-4.80203	1.57065e-06	2.89989e-05	CR33294
CG1092	123.714	-2.05481	0.428033	-4.80058	1.58205e-06	2.91692e-05	CG1092
CG3598	264.735	-11.9232	2.48557	-4.79696	1.61089e-06	2.96603e-05	CG3598
Nlg1	474.152	1.19317	0.248827	4.7952	1.62513e-06	2.98814e-05	Nlg1
CG31262	231.515	-1.96512	0.409998	-4.79301	1.64296e-06	3.0168e-05	CG31262
CG4455	327.198	-1.18716	0.248026	-4.78644	1.69766e-06	3.11299e-05	CG4455
CG7632	228.79	-1.12833	0.235986	-4.78134	1.74135e-06	3.18875e-05	CG7632
CG17283	16.724	-7.80633	1.63362	-4.77854	1.76575e-06	3.22904e-05	CG17283
tn	7474.95	1.15083	0.240848	4.77824	1.76833e-06	3.22936e-05	tn
TwdlF	212.008	-5.92144	1.23936	-4.7778	1.77221e-06	3.23205e-05	TwdlF
axed	291.537	1.07709	0.225496	4.77652	1.78353e-06	3.2483e-05	axed
CG2841	1183.46	-0.977504	0.204773	-4.7736	1.80959e-06	3.2913e-05	CG2841
Nap1	3293.43	-1.31074	0.274889	-4.76824	1.85846e-06	3.37562e-05	Nap1
asRNA:CR45926	3281.98	-1.31314	0.27559	-4.76483	1.8901e-06	3.42845e-05	asRNA:CR45926
CG31974	144.84	-1.9093	0.401015	-4.76117	1.92475e-06	3.4819e-05	CG31974
IM33	949.436	1.84348	0.387176	4.76135	1.92303e-06	3.4819e-05	IM33
mol	407.959	-1.45952	0.306957	-4.7548	1.98644e-06	3.58868e-05	mol
CG15515	1228.03	-2.04672	0.430714	-4.75191	2.01499e-06	3.63537e-05	CG15515
CG32816	143.476	-1.49849	0.315495	-4.74964	2.03778e-06	3.66279e-05	CG32816
CG3328	1747.91	-1.22177	0.257238	-4.74958	2.03837e-06	3.66279e-05	CG3328
Lrch	373.167	0.992041	0.208848	4.75006	2.03354e-06	3.66279e-05	Lrch
tnc	3431.07	-4.98805	1.05041	-4.74868	2.0475e-06	3.67428e-05	tnc
tal-AA	597.397	-2.6945	0.567623	-4.74698	2.06473e-06	3.68063e-05	tal-AA
tal-1A	597.397	-2.6945	0.567623	-4.74698	2.06473e-06	3.68063e-05	tal-1A
tal-3A	597.397	-2.6945	0.567623	-4.74698	2.06473e-06	3.68063e-05	tal-3A
tal-2A	597.397	-2.6945	0.567623	-4.74698	2.06473e-06	3.68063e-05	tal-2A
Vago	179.574	2.07239	0.43652	4.74753	2.05917e-06	3.68063e-05	Vago
CG14355	29.3647	4.65058	0.980614	4.74252	2.11073e-06	3.75766e-05	CG14355
Cpr78E	791.193	6.28672	1.32715	4.737	2.16906e-06	3.8564e-05	Cpr78E
CG43291	22.3205	3.89087	0.821756	4.73482	2.19244e-06	3.89282e-05	CG43291
CG4666	385.596	-2.05726	0.43469	-4.73271	2.2154e-06	3.92839e-05	CG4666
CG6937	117.009	-1.37774	0.291159	-4.73192	2.22411e-06	3.93864e-05	CG6937
CG12824	20.9701	3.70687	0.784512	4.72506	2.30048e-06	4.06853e-05	CG12824
Nop60B	806.551	-0.870725	0.184356	-4.72307	2.32316e-06	4.10323e-05	Nop60B
sncRNA:359	1927.8	1.52488	0.323274	4.71698	2.39376e-06	4.22237e-05	sncRNA:359
eater	153.279	-3.30604	0.701876	-4.7103	2.47357e-06	4.35173e-05	eater
CG8064	111.744	-1.47569	0.31329	-4.7103	2.47352e-06	4.35173e-05	CG8064
Myc	3104.32	-1.49813	0.318126	-4.70921	2.48673e-06	4.36347e-05	Myc
CG10483	469.457	1.01222	0.214941	4.70928	2.48591e-06	4.36347e-05	CG10483
Asator	2213.8	1.1683	0.248184	4.7074	2.50891e-06	4.39664e-05	Asator
CG32276	1375.27	-0.950658	0.201966	-4.70703	2.51358e-06	4.39909e-05	CG32276
nAChRbeta3	115.975	-1.75093	0.372318	-4.70279	2.56627e-06	4.46894e-05	nAChRbeta3
mt:ND5	8725.09	-0.971735	0.206631	-4.70275	2.56679e-06	4.46894e-05	mt:ND5
Ip6k	1206.1	1.07174	0.227871	4.70328	2.56009e-06	4.46894e-05	Ip6k
CG43085	139.244	2.20509	0.468867	4.70302	2.56345e-06	4.46894e-05	CG43085
CG32237	52.1238	-3.55638	0.756811	-4.69916	2.6123e-06	4.5423e-05	CG32237
CG4829	590.831	-1.05592	0.224866	-4.69578	2.65593e-06	4.60624e-05	CG4829
Pdp	476.602	0.883939	0.18824	4.69581	2.65548e-06	4.60624e-05	Pdp
lncRNA:CR44830	48.3757	-2.74375	0.584409	-4.69491	2.66727e-06	4.61995e-05	lncRNA:CR44830
CG4038	172.106	-1.67945	0.357907	-4.69242	2.6999e-06	4.67045e-05	CG4038
CG9281	2640.81	-0.823201	0.17569	-4.68554	2.79229e-06	4.82406e-05	CG9281
CG32409	151.619	-1.25317	0.267547	-4.68391	2.81449e-06	4.85617e-05	CG32409
CG3108	182.521	-5.44842	1.16347	-4.68291	2.82833e-06	4.8738e-05	CG3108
CG16758	901.693	-2.19223	0.468278	-4.68147	2.84828e-06	4.90188e-05	CG16758
Gfat1	6945.08	-0.883647	0.188788	-4.68062	2.86002e-06	4.91579e-05	Gfat1
CG42700	634.159	1.16235	0.248392	4.67949	2.87596e-06	4.93688e-05	CG42700
Ns3	152.395	-1.14055	0.243792	-4.67838	2.89144e-06	4.95713e-05	Ns3
bs	315.687	-1.27318	0.272221	-4.67701	2.91081e-06	4.98398e-05	bs
CG15546	657.741	-1.65174	0.353633	-4.67079	3.00049e-06	5.13099e-05	CG15546
CG8611	106.997	-1.80157	0.385881	-4.6687	3.0311e-06	5.17675e-05	CG8611
Zip89B	315.061	-1.18295	0.253785	-4.66124	3.14309e-06	5.3612e-05	Zip89B
CG14183	44.8765	2.1015	0.451039	4.65924	3.17378e-06	5.4067e-05	CG14183
Proc-R	399.864	1.14536	0.24601	4.65576	3.2278e-06	5.49175e-05	Proc-R
CG7896	927.5	-1.06713	0.229496	-4.64987	3.32144e-06	5.64393e-05	CG7896
form3	2118.03	-1.17029	0.25193	-4.64531	3.39569e-06	5.76282e-05	form3
CG15711	15.5595	5.6682	1.22058	4.64385	3.41969e-06	5.79623e-05	CG15711
CG30269	272.095	1.17087	0.252164	4.64328	3.42924e-06	5.79779e-05	CG30269
CG30273	272.095	1.17087	0.252164	4.64328	3.42924e-06	5.79779e-05	CG30273
CG14327	30.6342	-5.35064	1.15243	-4.64292	3.43522e-06	5.8006e-05	CG14327
CTPsyn	388.625	-1.0923	0.235287	-4.64239	3.44404e-06	5.80092e-05	CTPsyn
tna	2653.23	1.2185	0.262462	4.64257	3.44094e-06	5.80092e-05	tna
lncRNA:CR31781	2141.11	1.33969	0.288884	4.63747	3.52702e-06	5.93325e-05	lncRNA:CR31781
CG6712	134.693	-1.54753	0.333811	-4.63595	3.55305e-06	5.96958e-05	CG6712
Jupiter	932.483	-1.25244	0.270229	-4.63472	3.57418e-06	5.99757e-05	Jupiter
CG13297	25.4683	-5.21287	1.12525	-4.63264	3.61023e-06	6.05052e-05	CG13297
TwdlE	57.9957	-2.27138	0.49079	-4.628	3.69223e-06	6.18023e-05	TwdlE
Mvl	671.116	1.2969	0.280622	4.62151	3.8095e-06	6.36068e-05	Mvl
Agxt	83.5141	2.03037	0.43931	4.62174	3.80544e-06	6.36068e-05	Agxt
asRNA:CR44962	148.299	-2.28117	0.493995	-4.61779	3.87841e-06	6.4677e-05	asRNA:CR44962
ClC-a	496.028	1.05101	0.227785	4.61406	3.94877e-06	6.57687e-05	ClC-a
CG9411	271.282	-4.86655	1.0548	-4.61373	3.95509e-06	6.57925e-05	CG9411
CG14191	25.6023	-6.59281	1.42912	-4.61321	3.96503e-06	6.58763e-05	CG14191
CG14984	258.892	-1.88115	0.408193	-4.60847	4.05637e-06	6.68977e-05	CG14984
asRNA:CR45264	244.521	-1.06321	0.230685	-4.6089	4.04804e-06	6.68977e-05	asRNA:CR45264
Droj2	2709.94	-0.845432	0.183445	-4.60865	4.05299e-06	6.68977e-05	Droj2
bowl	950.943	-0.724067	0.157099	-4.60898	4.04645e-06	6.68977e-05	bowl
Cyp6a14	90.484	1.35259	0.293446	4.60935	4.03936e-06	6.68977e-05	Cyp6a14
Gr28b	145.781	2.08821	0.45308	4.60893	4.04756e-06	6.68977e-05	Gr28b
CG6209	26.2558	5.20484	1.12973	4.60716	4.08215e-06	6.72404e-05	CG6209
CG8539	88.5715	-2.00783	0.436318	-4.60175	4.18948e-06	6.88694e-05	CG8539
CG8929	540.747	1.08654	0.236119	4.60166	4.19129e-06	6.88694e-05	CG8929
asRNA:CR17025	32.9281	-2.59446	0.564099	-4.5993	4.23914e-06	6.94858e-05	asRNA:CR17025
Muc11A	4341.68	2.60936	0.56733	4.59937	4.23763e-06	6.94858e-05	Muc11A
CG34426	684.742	1.78978	0.389184	4.5988	4.24938e-06	6.95687e-05	CG34426
CG31650	442.594	-0.781084	0.170061	-4.59297	4.36972e-06	7.14519e-05	CG31650
Nepl19	53.6869	-3.46129	0.754056	-4.59022	4.42771e-06	7.2312e-05	Nepl19
pths	393.811	-0.887469	0.193426	-4.58815	4.47191e-06	7.29452e-05	pths
Alp1	405.862	3.44986	0.752127	4.5868	4.50086e-06	7.33285e-05	Alp1
CG33655	1093.06	1.099	0.239632	4.58619	4.51398e-06	7.34533e-05	CG33655
NimB2	314.194	1.18555	0.258522	4.58588	4.52074e-06	7.34742e-05	NimB2
Rpi	595.596	0.977624	0.213212	4.58522	4.53498e-06	7.36168e-05	Rpi
CG11837	62.7143	-2.01128	0.439011	-4.5814	4.61882e-06	7.48618e-05	CG11837
Su(var)3-9	280.278	-0.820044	0.179001	-4.58122	4.62282e-06	7.48618e-05	Su(var)3-9
mwh	191.075	-2.37049	0.518945	-4.56789	4.92656e-06	7.96846e-05	mwh
CG32248	38.4853	-2.67654	0.586257	-4.56547	4.98384e-06	8.04304e-05	CG32248
CG9095	553.581	-2.35127	0.515016	-4.56543	4.98464e-06	8.04304e-05	CG9095
CG17190	134.241	-2.26102	0.495332	-4.56465	5.00333e-06	8.06352e-05	CG17190
bmm	174.259	1.28131	0.280831	4.56257	5.05301e-06	8.13383e-05	bmm
lncRNA:CR45279	222.529	-1.36459	0.299307	-4.55916	5.13576e-06	8.25383e-05	lncRNA:CR45279
CG46306	325.87	1.49553	0.32804	4.559	5.13984e-06	8.25383e-05	CG46306
BomBc1	14.6114	6.13215	1.34575	4.55668	5.19678e-06	8.33531e-05	BomBc1
CG15247	1158.91	1.34857	0.296088	4.55462	5.24797e-06	8.40738e-05	CG15247
CG14107	179.041	-5.93946	1.30449	-4.55309	5.28648e-06	8.459e-05	CG14107
CG8568	18.5617	-6.92887	1.52215	-4.55203	5.31317e-06	8.49159e-05	CG8568
CG31921	33.0356	4.66044	1.02396	4.55138	5.32963e-06	8.50779e-05	CG31921
CG34268	224.959	-7.89307	1.73486	-4.54968	5.37283e-06	8.56657e-05	CG34268
CG6834	267.168	-1.71375	0.376944	-4.54642	5.4567e-06	8.68998e-05	CG6834
snoRNA:Me28S-U1688	20.9172	2.94145	0.647165	4.54513	5.49003e-06	8.73272e-05	snoRNA:Me28S-U1688
CG13004	328.497	1.49641	0.329331	4.54379	5.52512e-06	8.77815e-05	CG13004
asRNA:CR45485	619.998	1.15526	0.254408	4.54096	5.59976e-06	8.88623e-05	asRNA:CR45485
CG17636	55.2743	3.51652	0.774679	4.53933	5.64343e-06	8.94496e-05	CG17636
Cpr65Ea	518.616	-12.8923	2.84065	-4.5385	5.6655e-06	8.95882e-05	Cpr65Ea
CG8642	58.312	1.97539	0.435235	4.53867	5.66109e-06	8.95882e-05	CG8642
CG13337	50.2877	4.07434	0.897861	4.53783	5.68365e-06	8.97696e-05	CG13337
unc-13	1935.04	1.11446	0.245825	4.53355	5.80013e-06	9.15018e-05	unc-13
AdSL	212.547	-0.987978	0.218004	-4.53193	5.84472e-06	9.19893e-05	AdSL
Nep3	462.406	1.23803	0.273178	4.53194	5.84438e-06	9.19893e-05	Nep3
CG8860	245.435	-1.07487	0.237214	-4.53123	5.86402e-06	9.21851e-05	CG8860
Had1	619.976	1.14977	0.253795	4.53033	5.88918e-06	9.24725e-05	Had1
spz6	110.225	-4.42869	0.977624	-4.53006	5.89681e-06	9.24843e-05	spz6
Ilp6	91.7217	2.48291	0.548181	4.52936	5.91632e-06	9.26822e-05	Ilp6
hui	3077.85	-1.14617	0.253489	-4.5216	6.13738e-06	9.60332e-05	hui
Ir62a	54.5621	2.59579	0.574231	4.52046	6.17062e-06	9.64411e-05	Ir62a
CG1688	38.3971	-2.79753	0.619211	-4.5179	6.24548e-06	9.74977e-05	CG1688
825-Oak	12.2811	-7.49466	1.65932	-4.51671	6.28068e-06	9.79335e-05	825-Oak
CG4017	14.1779	-6.66947	1.47739	-4.51436	6.35092e-06	9.86057e-05	CG4017
CG15024	16.528	-5.15416	1.14158	-4.51495	6.33312e-06	9.86057e-05	CG15024
CG9458	98.5905	-2.78184	0.616264	-4.51404	6.36047e-06	9.86057e-05	CG9458
CG3632	733.898	0.834726	0.184893	4.51464	6.34251e-06	9.86057e-05	CG3632
CG7164	16.4287	6.49529	1.43887	4.51415	6.35725e-06	9.86057e-05	CG7164
pre-mod(mdg4)-C	127.155	1.15809	0.25678	4.51004	6.48147e-06	0.00010025	pre-mod(mdg4)-C
pre-mod(mdg4)-AB	127.155	1.15809	0.25678	4.51004	6.48147e-06	0.00010025	pre-mod(mdg4)-AB
CG33920	52.5848	2.9792	0.661038	4.50686	6.57954e-06	0.00010165	CG33920
Cht10	4515.02	-2.82728	0.628145	-4.50101	6.76321e-06	0.000104248	Cht10
Polr1A	440.034	-1.07249	0.238273	-4.5011	6.76036e-06	0.000104248	Polr1A
CG3335	179.431	-1.17623	0.261619	-4.49595	6.926e-06	0.000106358	CG3335
CG15412	207.576	1.8482	0.411052	4.49626	6.91597e-06	0.000106358	CG15412
CG33225	39.3123	2.94679	0.655356	4.49648	6.90878e-06	0.000106358	CG33225
Est-P	152.285	2.94996	0.656163	4.49577	6.93175e-06	0.000106358	Est-P
Cf2	967.218	1.07259	0.238711	4.49327	7.01388e-06	0.000107382	Cf2
ms(2)34Fe	7.00693	7.14832	1.5909	4.49325	7.01445e-06	0.000107382	ms(2)34Fe
CG32388	18.9403	7.63228	1.69891	4.49246	7.04054e-06	0.000107536	CG32388
CG43439	18.9403	7.63228	1.69891	4.49246	7.04054e-06	0.000107536	CG43439
CG31468	11.3907	7.89624	1.75811	4.49131	7.07848e-06	0.000107993	CG31468
pre-mod(mdg4)-E	127.664	1.15809	0.258007	4.48862	7.16873e-06	0.000109246	pre-mod(mdg4)-E
a	173.968	-1.56152	0.348055	-4.48641	7.24338e-06	0.000110258	a
DOR	9784.9	1.39242	0.310565	4.48351	7.34248e-06	0.000111641	DOR
BomBc2	16.581	4.36893	0.97455	4.48302	7.35938e-06	0.000111771	BomBc2
Swip-1	688.357	-1.03756	0.231646	-4.47907	7.49679e-06	0.000113472	Swip-1
CG12581	1838.84	-0.940559	0.210001	-4.47883	7.50517e-06	0.000113472	CG12581
CG1965	339.968	0.863017	0.19267	4.47925	7.49066e-06	0.000113472	CG1965
GlyP	44845.5	1.14211	0.254997	4.47891	7.50243e-06	0.000113472	GlyP
Drs	43.3824	2.6764	0.598153	4.47444	7.66127e-06	0.000115702	Drs
Prp39	756.917	0.824174	0.184254	4.47304	7.71158e-06	0.000116331	Prp39
CG42788	760.141	-1.06814	0.238827	-4.47244	7.73307e-06	0.000116525	CG42788
Hsp70Bbb	64.6554	-4.97212	1.11197	-4.47147	7.76854e-06	0.000116763	Hsp70Bbb
Dbp73D	93.6267	-1.42483	0.318663	-4.47129	7.77491e-06	0.000116763	Dbp73D
sip2	108.543	2.17197	0.485714	4.4717	7.75998e-06	0.000116763	sip2
CG5335	145.085	1.37109	0.306683	4.47071	7.79615e-06	0.000116951	CG5335
Tudor-SN	2819.09	-1.51726	0.339566	-4.46823	7.88688e-06	0.00011818	Tudor-SN
CG15022	98.2607	-8.75408	1.96051	-4.4652	7.99946e-06	0.0001196	CG15022
CG17105	104.837	4.28459	0.959523	4.46534	7.99419e-06	0.0001196	CG17105
caps	1029.49	-0.843957	0.18906	-4.46397	8.04537e-06	0.000120153	caps
AkhR	68.3992	2.40497	0.53912	4.46091	8.1611e-06	0.000121746	AkhR
Spn88Ea	816.228	-1.21283	0.272073	-4.45775	8.28258e-06	0.000123012	Spn88Ea
Nin	453.009	0.924287	0.207317	4.45834	8.25979e-06	0.000123012	Nin
SmydA-9	606.385	1.48618	0.33336	4.45819	8.26564e-06	0.000123012	SmydA-9
lncRNA:CR46073	34.876	2.30303	0.516622	4.45786	8.2781e-06	0.000123012	lncRNA:CR46073
Edg78E	34.3227	-2.45065	0.550086	-4.45503	8.38819e-06	0.000124443	Edg78E
Mys45A	276.162	-0.942537	0.211599	-4.45436	8.41456e-06	0.000124697	Mys45A
trh	348.686	-1.2668	0.284454	-4.45344	8.45069e-06	0.000125094	trh
CG30427	463.817	-3.11473	0.700223	-4.4482	8.65928e-06	0.000128041	CG30427
Saf-B	1018.55	1.14783	0.258256	4.44455	8.80744e-06	0.000129946	Saf-B
CG10514	263.513	2.27605	0.512082	4.4447	8.80147e-06	0.000129946	CG10514
lncRNA:CR44964	134.016	-1.7401	0.391551	-4.44411	8.82555e-06	0.00013007	lncRNA:CR44964
wcd	87.3149	-1.39218	0.313329	-4.44319	8.86332e-06	0.000130484	wcd
CG8249	133.388	-1.93523	0.436083	-4.43776	9.08998e-06	0.000133674	CG8249
ea	471.933	-1.29394	0.291899	-4.43282	9.30082e-06	0.000136625	ea
bys	147.372	-1.37101	0.309494	-4.42985	9.43004e-06	0.000138372	bys
CG7530	285.278	-1.13581	0.256595	-4.42648	9.5785e-06	0.000140398	CG7530
ab	1738.7	-1.38959	0.314045	-4.42482	9.65222e-06	0.000141324	ab
CG16926	308.579	2.20994	0.499869	4.42104	9.82266e-06	0.000143663	CG16926
CG10286	254.647	-0.913664	0.206771	-4.41872	9.92885e-06	0.000145058	CG10286
l(2)05287	228.948	-1.40468	0.318446	-4.41104	1.02877e-05	0.000150137	l(2)05287
CG6040	1477.73	-1.37607	0.312027	-4.41008	1.0333e-05	0.000150568	CG6040
Rchy1	446.589	-1.15222	0.261278	-4.40995	1.03396e-05	0.000150568	Rchy1
CG1494	31.6828	2.66046	0.603544	4.40806	1.04298e-05	0.000151718	CG1494
U3-55K	54.5538	-1.70694	0.387292	-4.40737	1.04633e-05	0.00015204	U3-55K
CG6118	117.897	-4.40972	1.00099	-4.40534	1.05617e-05	0.000153305	CG6118
CG34267	196.615	-7.04235	1.59896	-4.40433	1.06112e-05	0.000153707	CG34267
qua	63.535	-2.21224	0.50229	-4.40431	1.06123e-05	0.000153707	qua
Cbs	493.292	-0.811071	0.184309	-4.40061	1.07945e-05	0.000156178	Cbs
CG5254	1199.97	1.15096	0.261874	4.39509	1.10729e-05	0.000160032	CG5254
CG3198	738.155	0.949364	0.216032	4.39455	1.11001e-05	0.000160254	CG3198
CG9512	838.927	-1.22458	0.278926	-4.39036	1.13166e-05	0.000163204	CG9512
Poxn	33.1729	-2.03293	0.46386	-4.38263	1.17257e-05	0.000168923	Poxn
pigs	1349.92	-1.23372	0.281521	-4.38235	1.17407e-05	0.000168958	pigs
CG43366	245.725	-4.68703	1.0711	-4.37592	1.20922e-05	0.000173803	CG43366
CG34043	187.57	1.79836	0.410985	4.37572	1.21032e-05	0.000173803	CG34043
AstA-R2	166.655	1.13002	0.258446	4.37235	1.22917e-05	0.000176321	AstA-R2
Men-b	2623.33	1.25612	0.287547	4.36841	1.25154e-05	0.000179339	Men-b
CG31195	875.758	-0.902476	0.206687	-4.3664	1.2631e-05	0.000180802	CG31195
CG18179	17.0844	3.44515	0.789478	4.36383	1.27805e-05	0.000182748	CG18179
Cht5	594.79	-1.82014	0.417289	-4.36182	1.28984e-05	0.000184238	Cht5
Zasp66	30010.4	1.08004	0.247745	4.3595	1.30358e-05	0.000186002	Zasp66
CG13438	16.2097	-7.8946	1.81138	-4.35834	1.31052e-05	0.000186794	CG13438
pre-mod(mdg4)-Z	207.946	1.01907	0.234006	4.35489	1.33133e-05	0.000189359	pre-mod(mdg4)-Z
pre-mod(mdg4)-T	207.946	1.01907	0.234006	4.35489	1.33133e-05	0.000189359	pre-mod(mdg4)-T
asRNA:CR46092	137.102	-1.8515	0.42519	-4.35452	1.33361e-05	0.000189483	asRNA:CR46092
CG32645	165.056	-2.01432	0.463147	-4.3492	1.36637e-05	0.000193524	CG32645
Stip1	969.466	-0.849004	0.195209	-4.34921	1.36628e-05	0.000193524	Stip1
RIC-3	2878.59	1.01496	0.233358	4.34937	1.36527e-05	0.000193524	RIC-3
rdgA	1856.35	1.25573	0.288856	4.34724	1.37859e-05	0.000195049	rdgA
CG7432	125.056	-2.38742	0.549786	-4.34245	1.40905e-05	0.000199149	CG7432
CG3847	367.768	-0.883164	0.203488	-4.34012	1.42404e-05	0.000201056	CG3847
Mur18B	3195.98	2.05853	0.474432	4.33893	1.43176e-05	0.000201934	Mur18B
ewg	495.591	1.00871	0.232632	4.33607	1.45053e-05	0.000204367	ewg
Pka-C3	3199.2	0.942513	0.217389	4.33561	1.45355e-05	0.000204577	Pka-C3
Tpr2	1228.15	-0.775235	0.178843	-4.33471	1.45952e-05	0.000205203	Tpr2
CYLD	402.378	0.73883	0.170543	4.33221	1.47619e-05	0.00020733	CYLD
Pih1D1	770.597	0.7989	0.184426	4.33181	1.47888e-05	0.00020749	Pih1D1
CG4374	129.827	-2.11421	0.488267	-4.33002	1.49098e-05	0.000208962	CG4374
CG5390	796.851	-0.772121	0.178327	-4.3298	1.49248e-05	0.000208962	CG5390
cher	16084.7	1.06272	0.245727	4.3248	1.52671e-05	0.000213533	cher
msk	2648.78	-0.775049	0.179305	-4.32252	1.54256e-05	0.000215525	msk
St1	29.3566	-2.85877	0.661762	-4.31993	1.56076e-05	0.000217693	St1
CG7910	566.745	-1.5407	0.356671	-4.31967	1.56263e-05	0.000217693	CG7910
Aef1	429.602	-1.02252	0.236714	-4.31963	1.56293e-05	0.000217693	Aef1
Mur89F	607.852	-5.9411	1.37598	-4.31773	1.57642e-05	0.000219344	Mur89F
Dso2	13.8184	5.54191	1.28391	4.31645	1.58559e-05	0.000220393	Dso2
Tsf2	619.027	-0.736568	0.170678	-4.31553	1.59218e-05	0.000220945	Tsf2
Pli	574.877	0.826206	0.191454	4.31544	1.59286e-05	0.000220945	Pli
SmydA-4	202.746	1.19935	0.277979	4.31454	1.59938e-05	0.000221165	SmydA-4
GNBP-like3	22.6994	2.54584	0.590052	4.31461	1.59888e-05	0.000221165	GNBP-like3
Oatp58Da	38.8677	2.56319	0.594045	4.31481	1.59738e-05	0.000221165	Oatp58Da
CG14961	166.152	-2.76465	0.640968	-4.31325	1.60875e-05	0.000222027	CG14961
Ance-4	95.7603	2.58725	0.599841	4.31322	1.60891e-05	0.000222027	Ance-4
CG16743	103.919	1.75586	0.407346	4.3105	1.62886e-05	0.000224548	CG16743
CG7457	2880.12	1.08356	0.251438	4.30945	1.63659e-05	0.000225383	CG7457
CG5955	105.56	1.63726	0.38014	4.30701	1.65479e-05	0.000227657	CG5955
CG32603	10652.5	-2.16253	0.50255	-4.30312	1.68412e-05	0.000231455	CG32603
Tb	136.612	-10.9674	2.54945	-4.30186	1.69369e-05	0.000232532	Tb
S-Lap2	40.3817	4.42746	1.02926	4.30158	1.69587e-05	0.000232593	S-Lap2
m	40.4714	-4.75988	1.10683	-4.30046	1.70447e-05	0.000233535	m
CG8483	983.377	-1.59688	0.371375	-4.29991	1.70865e-05	0.000233869	CG8483
l(2)k09022	284.568	-1.54573	0.359502	-4.29965	1.71064e-05	0.000233904	l(2)k09022
Rhp	187.918	-1.10953	0.25828	-4.29586	1.74019e-05	0.000237702	Rhp
CG31102	118.611	1.59481	0.371375	4.29433	1.7522e-05	0.000239099	CG31102
whd	2304.92	0.855385	0.199213	4.29382	1.75627e-05	0.00023917	whd
CG17739	50.4887	1.62748	0.379022	4.29389	1.75568e-05	0.00023917	CG17739
CG13049	97.3912	-10.4752	2.44003	-4.29305	1.76235e-05	0.000239755	CG13049
Smyd5	114.845	-1.56727	0.365185	-4.29172	1.77298e-05	0.000240956	Smyd5
CG6724	88.0318	-1.25836	0.293516	-4.28718	1.80957e-05	0.000245433	CG6724
CG8028	97.9872	2.25153	0.525163	4.2873	1.80856e-05	0.000245433	CG8028
CG9083	56.7142	-3.66992	0.856308	-4.28575	1.82127e-05	0.000246771	CG9083
CG14424	1148.52	-9.53392	2.22485	-4.2852	1.82577e-05	0.000247023	CG14424
mbm	122.507	-1.1862	0.276821	-4.28507	1.82681e-05	0.000247023	mbm
lncRNA:CR45893	473.353	-4.61887	1.07799	-4.28472	1.82966e-05	0.000247161	lncRNA:CR45893
CG32572	171.827	-0.932412	0.217839	-4.28029	1.86651e-05	0.00025174	CG32572
Idgf3	2285.51	0.715844	0.167246	4.28019	1.86731e-05	0.00025174	Idgf3
CG8547	5282.32	0.661115	0.154531	4.27819	1.88416e-05	0.000253757	CG8547
CG12909	60.8016	-1.53361	0.358598	-4.27668	1.89701e-05	0.000254977	CG12909
lute	719.497	-1.08659	0.254072	-4.27671	1.89672e-05	0.000254977	lute
Rtc1	56.1941	-1.67203	0.391007	-4.27621	1.90105e-05	0.000255264	Rtc1
CG2691	428.087	-0.923499	0.21603	-4.27487	1.91248e-05	0.000256543	CG2691
Mkp3	452.032	-0.86263	0.201808	-4.27451	1.91562e-05	0.000256709	Mkp3
Ptr	257.714	-2.29168	0.536243	-4.27358	1.92355e-05	0.000257258	Ptr
betaggt-I	251.825	1.05452	0.246749	4.27367	1.92283e-05	0.000257258	betaggt-I
Cat	1856.65	0.952815	0.222986	4.27299	1.92871e-05	0.000257692	Cat
Srr	151.66	1.64249	0.384592	4.27074	1.94822e-05	0.00026004	Srr
mv	862.859	1.35119	0.316435	4.27006	1.95422e-05	0.000260582	mv
Cerk	579.673	0.706348	0.165464	4.26891	1.96433e-05	0.00026167	Cerk
Jafrac1	1879.02	-0.94606	0.22167	-4.26788	1.9734e-05	0.000262619	Jafrac1
CG5867	226.323	-2.33265	0.54663	-4.26733	1.97829e-05	0.00026275	CG5867
CG10602	1133.81	0.660882	0.154862	4.26754	1.97636e-05	0.00026275	CG10602
Cyp4g1	14679.6	-1.64863	0.386454	-4.26603	1.98982e-05	0.000264019	Cyp4g1
CG10339	49.1971	-1.94584	0.456517	-4.26235	2.02285e-05	0.000268137	CG10339
Cyp4d14	62.3251	2.2965	0.539054	4.26024	2.04209e-05	0.000270421	Cyp4d14
CG6923	324.419	1.44201	0.338783	4.25646	2.07689e-05	0.000274758	CG6923
CG9522	62.447	-4.38944	1.03189	-4.25377	2.10199e-05	0.000277806	CG9522
CG13443	26.1534	-7.61028	1.78977	-4.25211	2.11769e-05	0.000279606	CG13443
Cyp4aa1	757.422	1.39824	0.328907	4.25117	2.12658e-05	0.000280505	Cyp4aa1
SerT	73.1136	1.4394	0.338644	4.25048	2.13311e-05	0.000281089	SerT
CG15282	4378.54	-2.52969	0.595657	-4.24689	2.16763e-05	0.000285359	CG15282
Tsp42Ek	412.628	-1.44903	0.341233	-4.24646	2.1717e-05	0.000285615	Tsp42Ek
DCX-EMAP	39.7568	-1.99663	0.470374	-4.24477	2.18817e-05	0.000287331	DCX-EMAP
dlp	799.455	-0.818741	0.192886	-4.24468	2.18903e-05	0.000287331	dlp
Cpr67B	8843.43	-1.43964	0.339194	-4.24429	2.19282e-05	0.000287549	Cpr67B
CG7402	208.367	1.35623	0.319583	4.24374	2.19826e-05	0.00028788	CG7402
CG8952	94.6547	3.58813	0.84554	4.2436	2.19964e-05	0.00028788	CG8952
Papss	187.131	-2.23718	0.527476	-4.24128	2.22247e-05	0.000290585	Papss
Paip2	2867	1.28403	0.303448	4.23147	2.3217e-05	0.000303265	Paip2
Plp	938.928	1.14878	0.271588	4.22986	2.33837e-05	0.000305146	Plp
Nlp	1137.24	-0.761287	0.180004	-4.22928	2.34439e-05	0.000305635	Nlp
Srpk79D	2039.81	1.15476	0.273093	4.22843	2.35329e-05	0.000306498	Srpk79D
Pgi	7378.01	0.988023	0.233691	4.22791	2.35875e-05	0.000306911	Pgi
sisRNA:CR46358	53.1677	1.45444	0.344029	4.22767	2.36127e-05	0.000306942	sisRNA:CR46358
CG16798	40.8734	-3.93927	0.932052	-4.22645	2.37411e-05	0.000307819	CG16798
asRNA:CR44321	1593.35	1.12228	0.265542	4.22637	2.37488e-05	0.000307819	asRNA:CR44321
sowi	14.4362	8.09536	1.91534	4.2266	2.37251e-05	0.000307819	sowi
Karl	197.587	-2.06671	0.489621	-4.22104	2.43183e-05	0.000313124	Karl
Lcp65Aa	471.701	-1.9827	0.469721	-4.22101	2.43212e-05	0.000313124	Lcp65Aa
ppan	117.545	-1.24974	0.296074	-4.22104	2.43175e-05	0.000313124	ppan
Nph	481.586	-0.791227	0.187405	-4.22203	2.42115e-05	0.000313124	Nph
asRNA:CR46136	20.0536	2.64181	0.625723	4.22202	2.42127e-05	0.000313124	asRNA:CR46136
Nep6	34.9391	3.68164	0.872124	4.22147	2.42717e-05	0.000313124	Nep6
Lsp1beta	17480.4	4.46907	1.05876	4.22105	2.43162e-05	0.000313124	Lsp1beta
CaMKI	1926.08	0.95789	0.227047	4.2189	2.45493e-05	0.000315758	CaMKI
CG1785	302.68	-1.01555	0.240732	-4.21858	2.45842e-05	0.000315904	CG1785
CG12499	256.364	-1.35826	0.322009	-4.21809	2.46378e-05	0.000316291	CG12499
CG15219	18.6454	7.50573	1.78038	4.21581	2.48878e-05	0.000319196	CG15219
CG12911	58.7932	-1.77214	0.420683	-4.21253	2.52529e-05	0.000323569	CG12911
lncRNA:CR45750	12.8531	3.566	0.846927	4.21052	2.54786e-05	0.00032615	lncRNA:CR45750
CG43677	29.4237	-6.93705	1.64764	-4.2103	2.55035e-05	0.000326159	CG43677
CG13059	22.5481	-4.03035	0.957412	-4.20963	2.55784e-05	0.000326806	CG13059
CG11786	38.2418	-5.69824	1.35472	-4.2062	2.59696e-05	0.000331489	CG11786
Pi4KIIalpha	357.136	0.830955	0.197595	4.20535	2.60675e-05	0.000332222	Pi4KIIalpha
DZIP1	26.8712	2.17045	0.516125	4.20528	2.60765e-05	0.000332222	DZIP1
galectin	1237.72	1.06572	0.253489	4.20421	2.62e-05	0.000333479	galectin
Mst87F	19.2361	4.76661	1.1344	4.20189	2.6469e-05	0.000336585	Mst87F
Gbeta13F	5287.64	0.765462	0.18231	4.19868	2.68473e-05	0.000341072	Gbeta13F
eIF3e	1636.1	-0.956914	0.22797	-4.19754	2.69832e-05	0.000342475	eIF3e
fry	1759.95	1.77541	0.423011	4.19707	2.70385e-05	0.000342853	fry
Tsp47F	27.2701	-2.17928	0.519267	-4.19685	2.70659e-05	0.000342877	Tsp47F
eEF1delta	1117	-0.680113	0.162063	-4.19661	2.70945e-05	0.000342916	eEF1delta
CG7728	245.62	-1.16284	0.277129	-4.19604	2.71624e-05	0.000343452	CG7728
Hnf4	726.141	0.799895	0.190669	4.19521	2.72616e-05	0.000344382	Hnf4
CG5645	170.892	-1.19967	0.286131	-4.19272	2.75635e-05	0.000347848	CG5645
Cdc7	548.65	-0.705176	0.168199	-4.19252	2.75877e-05	0.000347848	Cdc7
CG17560	452.196	-1.65949	0.396057	-4.19002	2.78933e-05	0.000351372	CG17560
CG33281	212.494	1.93463	0.461873	4.18865	2.80616e-05	0.000353162	CG33281
Mcad	2700.01	1.16014	0.277056	4.1874	2.82162e-05	0.000354775	Mcad
Dso1	167.627	2.8328	0.67673	4.18601	2.83901e-05	0.000356627	Dso1
CG31121	478.362	-1.18457	0.283099	-4.18429	2.86053e-05	0.000358996	CG31121
CG30091	11.1445	4.78352	1.14381	4.18208	2.88858e-05	0.000362177	CG30091
CG5805	540.946	0.760865	0.181975	4.18115	2.90039e-05	0.000363319	CG5805
Tab2	642.291	0.761467	0.182284	4.17737	2.94906e-05	0.000369071	Tab2
nudC	236.785	-0.876637	0.209916	-4.17614	2.965e-05	0.000370378	nudC
CG5966	168.543	2.57903	0.617535	4.17634	2.96238e-05	0.000370378	CG5966
Sec61gamma	483.199	-0.874848	0.209515	-4.17559	2.97212e-05	0.000370922	Sec61gamma
ken	340.363	-1.07025	0.256338	-4.17516	2.97781e-05	0.000371287	ken
ppk26	198.47	-1.63796	0.392408	-4.17413	2.99133e-05	0.000372627	ppk26
ex	765.647	-1.33209	0.319184	-4.17343	3.00046e-05	0.000373418	ex
peg	576.71	-1.08549	0.260206	-4.17164	3.02409e-05	0.000376011	peg
PPO1	1106.83	-1.89713	0.454895	-4.17047	3.03967e-05	0.000377599	PPO1
Kah	202.676	1.05373	0.252765	4.1688	3.06208e-05	0.000380031	Kah
CG9008	207.424	-1.03529	0.248374	-4.16827	3.06921e-05	0.000380566	CG9008
Hsc70-4	41193.6	-0.796116	0.191375	-4.15997	3.18286e-05	0.000394293	Hsc70-4
CG1835	15.4528	3.55118	0.853802	4.15926	3.1928e-05	0.000395161	CG1835
CG6974	8.88451	-6.81628	1.63947	-4.1576	3.21607e-05	0.000397675	CG6974
CG32846	35.8523	2.88035	0.693002	4.15634	3.23383e-05	0.000399503	CG32846
Jra	511.589	-0.937491	0.225611	-4.15534	3.24807e-05	0.000400893	Jra
Nhe3	694.197	0.832221	0.200503	4.15066	3.31525e-05	0.00040881	Nhe3
Got1	2855.52	0.96048	0.231715	4.14509	3.39675e-05	0.000418476	Got1
ZC3H3	110.243	1.28436	0.310012	4.14292	3.42907e-05	0.000422071	ZC3H3
Mst36Fb	21.83	3.13484	0.756743	4.14255	3.43472e-05	0.00042238	Mst36Fb
CG42460	15.063	8.27103	1.99716	4.1414	3.45186e-05	0.000424099	CG42460
CG7611	713.986	0.676857	0.163451	4.14105	3.45725e-05	0.000424374	CG7611
CG14655	270.607	1.3185	0.318459	4.14025	3.46928e-05	0.000425461	CG14655
Aatf	116.827	-1.30429	0.315237	-4.1375	3.51113e-05	0.000430202	Aatf
conv	578.644	-0.921355	0.222726	-4.13671	3.52321e-05	0.000431289	conv
asRNA:CR45479	77.5259	2.21691	0.53612	4.1351	3.54804e-05	0.000433933	asRNA:CR45479
nsr	56.8929	2.14432	0.518663	4.13432	3.56006e-05	0.000435007	nsr
asRNA:CR45024	14.5237	6.08462	1.47188	4.1339	3.56657e-05	0.000435406	asRNA:CR45024
CG3534	304.528	-0.951761	0.230274	-4.13317	3.57793e-05	0.000435606	CG3534
lncRNA:CR43650	413.311	1.34461	0.325318	4.13323	3.57708e-05	0.000435606	lncRNA:CR43650
Unc-115b	332.585	1.42103	0.343779	4.13355	3.57203e-05	0.000435606	Unc-115b
slif	364.843	-2.28214	0.552224	-4.13264	3.58624e-05	0.000436223	slif
CG42566	41.0824	-2.14458	0.519167	-4.13081	3.61489e-05	0.000439311	CG42566
pyd	4006.16	1.43053	0.346343	4.13038	3.6217e-05	0.000439741	pyd
S-Lap3	42.4644	6.05041	1.46502	4.12992	3.62883e-05	0.000440208	S-Lap3
frm	28957.2	-1.19721	0.290229	-4.12507	3.70627e-05	0.000449198	frm
eIF3b	5729.03	-0.74197	0.179881	-4.12477	3.71104e-05	0.00044937	eIF3b
CG42237	130.737	-1.49611	0.362756	-4.12429	3.71884e-05	0.00044991	CG42237
Ugt36A1	123.781	-1.90068	0.461222	-4.12098	3.77266e-05	0.000456011	Ugt36A1
CG13643	19.7083	-2.75881	0.669507	-4.12066	3.77782e-05	0.000456224	CG13643
CG12206	886.074	-1.36991	0.33248	-4.12028	3.7842e-05	0.000456584	CG12206
CG42724	1097.33	1.21446	0.295038	4.11628	3.85044e-05	0.000464159	CG42724
Hn	1115.82	-1.83265	0.446771	-4.10198	4.09632e-05	0.000492915	Hn
orion	764.186	-0.784685	0.191292	-4.10202	4.0955e-05	0.000492915	orion
lncRNA:CR43126	51.2738	1.77213	0.432057	4.10161	4.10277e-05	0.00049325	lncRNA:CR43126
MstProx	9.81028	7.62215	1.86123	4.09522	4.21774e-05	0.00050631	MstProx
CG18662	12.4851	7.9561	1.94281	4.09515	4.21894e-05	0.00050631	CG18662
CG43149	75.284	-2.18168	0.533026	-4.09302	4.25793e-05	0.000510534	CG43149
Slc45-1	1256.57	0.979748	0.239439	4.09185	4.2794e-05	0.000512651	Slc45-1
asRNA:CR46263	48.5952	-2.45654	0.60054	-4.09055	4.30347e-05	0.000515075	asRNA:CR46263
asRNA:Eig63F-2	71.4579	1.78133	0.435513	4.09018	4.31038e-05	0.000515444	asRNA:Eig63F-2
anne	4215.54	0.838687	0.205064	4.08989	4.31581e-05	0.000515499	anne
IKKbeta	532.96	0.893803	0.218548	4.08974	4.31851e-05	0.000515499	IKKbeta
Pcf11	1465.17	0.934182	0.228514	4.08808	4.34961e-05	0.00051875	Pcf11
CG1889	12.3546	-5.41838	1.32661	-4.08437	4.41965e-05	0.000526636	CG1889
Cyp4p3	1047.8	1.01826	0.249466	4.08175	4.46979e-05	0.000532138	Cyp4p3
PPO2	1050.83	-2.11922	0.519707	-4.07772	4.54802e-05	0.000540494	PPO2
CG4962	4067.96	1.63695	0.401438	4.07772	4.54794e-05	0.000540494	CG4962
Ent2	375.937	-0.824291	0.202212	-4.07637	4.57448e-05	0.000543159	Ent2
alpha-Est9	1211.5	-0.613742	0.150636	-4.07433	4.61473e-05	0.000547455	alpha-Est9
eIF4E3	21.5119	4.14689	1.0181	4.07318	4.63758e-05	0.00054968	eIF4E3
mt:ATPase8	1339.73	-1.51051	0.370941	-4.0721	4.65902e-05	0.000551735	mt:ATPase8
CG9400	15.1699	-4.31618	1.0602	-4.0711	4.6791e-05	0.000553625	CG9400
Dredd	288.101	0.879338	0.216048	4.0701	4.69928e-05	0.000555524	Dredd
CG9143	124.707	-1.26221	0.310382	-4.06663	4.76982e-05	0.000562987	CG9143
CG3679	433.003	1.16084	0.285459	4.06658	4.7708e-05	0.000562987	CG3679
asRNA:CR45612	221.292	1.07208	0.263705	4.06545	4.79407e-05	0.000565238	asRNA:CR45612
RIOK2	215.153	-1.08179	0.266175	-4.06422	4.81935e-05	0.00056772	RIOK2
Mst84Da	9.70642	7.60608	1.8729	4.06113	4.88353e-05	0.000574776	Mst84Da
CG12723	61.8379	-8.83985	2.17898	-4.05688	4.97332e-05	0.000583811	CG12723
CG13245	13.4901	6.98436	1.72154	4.05705	4.96967e-05	0.000583811	CG13245
CG43816	13.4901	6.98436	1.72154	4.05705	4.96967e-05	0.000583811	CG43816
Eb1	2376.4	-0.563966	0.139131	-4.05349	5.04598e-05	0.000591824	Eb1
CG9289	107.047	-5.93717	1.46559	-4.05103	5.09917e-05	0.000597108	CG9289
Mthfs	79.326	1.51694	0.37446	4.051	5.09991e-05	0.000597108	Mthfs
CG12998	8.738	-7.00255	1.72882	-4.05048	5.11116e-05	0.000597384	CG12998
Pcp	412.289	1.48351	0.366248	4.05057	5.10937e-05	0.000597384	Pcp
CG9896	175.748	1.25893	0.310889	4.04947	5.13341e-05	0.000599463	CG9896
Pdk	4147.34	1.23483	0.304966	4.04908	5.14202e-05	0.000599947	Pdk
Mat89Ba	145.461	-1.15297	0.285055	-4.04471	5.23887e-05	0.000610717	Mat89Ba
Cyp6a18	31.3577	4.75273	1.17572	4.04239	5.29099e-05	0.000616258	Cyp6a18
Uhg1	189.914	-1.25336	0.310076	-4.04209	5.2978e-05	0.000616517	Uhg1
Art8	72.4904	-1.31879	0.326389	-4.04055	5.33269e-05	0.00062004	Art8
CG46317	2578.53	-1.45922	0.361403	-4.03766	5.39867e-05	0.000627085	CG46317
asRNA:CR44431	701.454	-1.03219	0.255651	-4.03749	5.40261e-05	0.000627085	asRNA:CR44431
CG8740	2566.59	-1.00882	0.249882	-4.03718	5.40967e-05	0.000627363	CG8740
Lsp1gamma	10099.5	5.41037	1.34102	4.03453	5.47113e-05	0.000633944	Lsp1gamma
CG4558	155.27	0.975556	0.24191	4.03273	5.51333e-05	0.000638283	CG4558
Recs1	6.04293	6.4029	1.5893	4.02875	5.6074e-05	0.000648615	Recs1
Pdcd4	6957.2	0.88275	0.2192	4.02714	5.64587e-05	0.000652503	Pdcd4
mas	236.252	-4.73198	1.17517	-4.02663	5.6582e-05	0.000653367	mas
SF1	628.263	0.857195	0.212905	4.0262	5.66864e-05	0.00065401	SF1
CG32373	577.23	-0.978233	0.242987	-4.02587	5.6765e-05	0.000654355	CG32373
Reg-5	933.904	-1.10636	0.274956	-4.02376	5.72772e-05	0.000659694	Reg-5
Mgstl	761.922	-1.03241	0.256757	-4.02097	5.79589e-05	0.000666579	Mgstl
CG30151	352.121	1.07614	0.267636	4.02091	5.79742e-05	0.000666579	CG30151
Fkbp14	1234.89	-1.44638	0.359871	-4.01917	5.84043e-05	0.00067095	Fkbp14
CG4691	13.5907	8.09536	2.01433	4.01888	5.84744e-05	0.000671183	CG4691
Osi2	134.311	-5.17677	1.28908	-4.01587	5.92267e-05	0.000679237	Osi2
Elp2	159.972	-1.13892	0.283625	-4.01559	5.92979e-05	0.000679474	Elp2
2SrRNA-Psi:CR45858	126.473	2.21671	0.552114	4.01496	5.94566e-05	0.000680712	2SrRNA-Psi:CR45858
asRNA:CR31514	124.958	-1.30883	0.326046	-4.01424	5.96386e-05	0.000682027	asRNA:CR31514
sala	127.799	1.53073	0.381357	4.0139	5.97236e-05	0.000682027	sala
CG43355	127.799	1.53073	0.381357	4.0139	5.97236e-05	0.000682027	CG43355
snoRNA:Me28S-C993	152.358	-2.82317	0.70344	-4.01338	5.9855e-05	0.000682946	snoRNA:Me28S-C993
CG6614	7.81376	7.33411	1.82828	4.01149	6.03376e-05	0.000687869	CG6614
CG11069	189.184	-1.14511	0.285534	-4.01042	6.06119e-05	0.000690411	CG11069
run	32.4749	1.83451	0.457515	4.00972	6.07898e-05	0.000691265	run
CG32444	43.5354	2.23116	0.556427	4.0098	6.07711e-05	0.000691265	CG32444
lncRNA:CR32658	33.4478	4.75823	1.18685	4.00912	6.09444e-05	0.000692437	lncRNA:CR32658
Lac	1239.8	-0.596575	0.148818	-4.00876	6.10391e-05	0.000692928	Lac
Btk	762.427	-0.882307	0.220146	-4.00783	6.12792e-05	0.000695067	Btk
sr	415.353	-1.3857	0.345768	-4.00761	6.13361e-05	0.000695126	sr
cbs	163.998	1.02677	0.256374	4.00496	6.20286e-05	0.000702381	cbs
salt	219.273	1.64045	0.409729	4.00374	6.23477e-05	0.0007054	salt
Tat	2652.23	-1.43828	0.359557	-4.00013	6.33077e-05	0.000715659	Tat
Muc91C	13.8791	-6.68326	1.67105	-3.99943	6.34957e-05	0.000717182	Muc91C
CG15406	221.292	1.82145	0.455948	3.99486	6.47322e-05	0.000730534	CG15406
ced-6	1527.65	-0.797576	0.199754	-3.9928	6.52982e-05	0.000736303	ced-6
Gnpnat	693.023	-1.17233	0.293762	-3.99075	6.58641e-05	0.000742062	Gnpnat
Ccp84Af	13.4773	-4.10446	1.0286	-3.99034	6.59786e-05	0.000742729	Ccp84Af
hiw	833.741	2.15647	0.540628	3.98883	6.63989e-05	0.000746835	hiw
Sr-CI	452.426	-2.33109	0.58504	-3.9845	6.76214e-05	0.000759949	Sr-CI
CG13862	25.454	-1.97822	0.49657	-3.98376	6.78324e-05	0.000761684	CG13862
Tom	18.1093	6.15015	1.54482	3.98114	6.85847e-05	0.000769488	Tom
CG31437	54.7692	-9.6482	2.42383	-3.98055	6.87548e-05	0.000770543	CG31437
Idgf2	1118.76	-1.00283	0.251942	-3.98042	6.87934e-05	0.000770543	Idgf2
sncRNA:204	92.2578	-1.31082	0.329352	-3.98001	6.89129e-05	0.000770702	sncRNA:204
CG2875	150.199	-1.27542	0.32046	-3.97998	6.89222e-05	0.000770702	CG2875
CG9300	126.222	-1.37623	0.345819	-3.97962	6.90252e-05	0.000771212	CG9300
CG30357	48.523	1.42417	0.358329	3.97449	7.05307e-05	0.000787378	CG30357
CG1542	140.506	-1.49221	0.375477	-3.97417	7.0625e-05	0.000787776	CG1542
CG33111	731.323	0.610073	0.153554	3.97303	7.09638e-05	0.000790899	CG33111
CG7884	61.2653	-3.09393	0.778999	-3.97167	7.13695e-05	0.000794762	CG7884
Oatp58Db	8.21384	5.33196	1.3428	3.97077	7.16417e-05	0.000797133	Oatp58Db
TwdlD	322.66	-12.2091	3.0754	-3.96991	7.18989e-05	0.000799333	TwdlD
CG7275	155.458	-1.17966	0.297373	-3.96692	7.2806e-05	0.000808748	CG7275
CG43165	24.7622	2.9541	0.744865	3.96596	7.31016e-05	0.000811362	CG43165
CG7497	130.526	-1.74059	0.438975	-3.96511	7.33611e-05	0.00081357	CG7497
scaf	4178.68	-1.21543	0.306583	-3.96443	7.35723e-05	0.00081524	scaf
Mst84Dd	6.90335	7.14502	1.80395	3.96076	7.47127e-05	0.000827193	Mst84Dd
CG32241	16284.3	-1.53695	0.3881	-3.96019	7.48917e-05	0.000828493	CG32241
l(2)k09848	142.241	-1.35132	0.341268	-3.95969	7.50482e-05	0.000829488	l(2)k09848
Prat	156.666	-1.0884	0.274883	-3.95951	7.51051e-05	0.000829488	Prat
Usp12-46	302.167	-1.08948	0.275215	-3.95866	7.53727e-05	0.000831761	Usp12-46
Osi17	38.4442	-4.00524	1.01186	-3.95831	7.5483e-05	0.000832295	Osi17
cnn	289.478	0.869541	0.219813	3.95582	7.62723e-05	0.000835514	cnn
pre-mod(mdg4)-W	282.601	0.892609	0.225591	3.95675	7.59749e-05	0.000835514	pre-mod(mdg4)-W
CG2701	168.06	1.02948	0.260234	3.95599	7.62176e-05	0.000835514	CG2701
inaE	353.122	1.1753	0.297106	3.95584	7.62659e-05	0.000835514	inaE
CG31373	90.5083	1.80614	0.456516	3.95635	7.61052e-05	0.000835514	CG31373
CG4757	251.981	1.92353	0.486223	3.95607	7.61934e-05	0.000835514	CG4757
CG17770	8.77017	7.4747	1.88907	3.95682	7.59555e-05	0.000835514	CG17770
Acam	8.77017	7.4747	1.88907	3.95682	7.59555e-05	0.000835514	Acam
lncRNA:CR44977	51.9392	-3.26034	0.824997	-3.95195	7.75175e-05	0.000848463	lncRNA:CR44977
alpha-Man-IIb	175.525	-1.13961	0.288768	-3.94644	7.93207e-05	0.000867493	alpha-Man-IIb
CG34284	104.528	1.69459	0.429475	3.94573	7.95567e-05	0.000868752	CG34284
fon	774.712	2.40654	0.609934	3.94557	7.96088e-05	0.000868752	fon
Obp99b	662.647	5.05451	1.28108	3.94551	7.96297e-05	0.000868752	Obp99b
Irc	745.191	-1.21561	0.308203	-3.94418	8.00737e-05	0.000872888	Irc
CG5800	150.542	-0.893269	0.226532	-3.94323	8.03919e-05	0.000875646	CG5800
CG32772	325.363	1.0678	0.270888	3.94184	8.08573e-05	0.000880002	CG32772
Zir	732.788	0.715297	0.181521	3.94057	8.1287e-05	0.000883963	Zir
unk	1320.89	1.17402	0.298108	3.93823	8.20849e-05	0.000891918	unk
Pka-R2	3325.18	1.13788	0.289249	3.93392	8.35732e-05	0.000907356	Pka-R2
pre-mod(mdg4)-V	281.428	0.887934	0.225852	3.93149	8.44215e-05	0.000914351	pre-mod(mdg4)-V
pre-mod(mdg4)-U	281.428	0.887934	0.225852	3.93149	8.44215e-05	0.000914351	pre-mod(mdg4)-U
asRNA:CR43981	118.856	1.58619	0.403444	3.93162	8.43752e-05	0.000914351	asRNA:CR43981
Listericin	105.947	2.84819	0.724607	3.93067	8.47104e-05	0.000916741	Listericin
Cyt-b5	1214.42	-0.921961	0.234655	-3.929	8.5301e-05	0.00092239	Cyt-b5
CG2962	193.337	-5.62962	1.43406	-3.92566	8.64909e-05	0.000934505	CG2962
slbo	30.2484	-3.92545	1.00066	-3.92285	8.75073e-05	0.000944728	slbo
CG10863	1268.85	-0.943458	0.240543	-3.92221	8.77407e-05	0.000946487	CG10863
CG15209	335.789	-1.0856	0.276964	-3.91965	8.86782e-05	0.000955207	CG15209
Tom40	867.599	-0.980365	0.250118	-3.91961	8.86912e-05	0.000955207	Tom40
CG5756	89.5705	-4.15264	1.05954	-3.91929	8.88098e-05	0.000955718	CG5756
MICU3	741.969	0.696188	0.177648	3.91891	8.89492e-05	0.000956453	MICU3
Achl	231.806	-6.4355	1.64358	-3.91554	9.02025e-05	0.000969154	Achl
lectin-24Db	37.1137	-3.2032	0.818192	-3.91497	9.04154e-05	0.000970666	lectin-24Db
GC1	640.366	0.652938	0.166934	3.91136	9.17774e-05	0.000984501	GC1
CG7330	44.1412	-2.93079	0.749445	-3.91061	9.20622e-05	0.000986769	CG7330
CG15747	142.508	0.898216	0.229704	3.91032	9.21745e-05	0.000987185	CG15747
Np	184.134	-5.51073	1.41062	-3.9066	9.36031e-05	0.00100169	Np
nompC	148.937	-1.54666	0.396141	-3.90431	9.44949e-05	0.00101043	nompC
CG34355	317.114	-2.07274	0.530976	-3.90364	9.4755e-05	0.0010124	CG34355
CG14926	13.5354	7.14639	1.83083	3.90335	9.4869e-05	0.00101281	CG14926
Cpr62Bb	88.1678	-5.93515	1.52094	-3.90228	9.52902e-05	0.0010165	Cpr62Bb
Fkbp59	751.309	-0.686833	0.176324	-3.89529	9.80794e-05	0.00104543	Fkbp59
Oatp58Dc	145.186	2.04114	0.524161	3.8941	9.85626e-05	0.00104975	Oatp58Dc
Glt	2037.1	-1.76138	0.45235	-3.89385	9.86646e-05	0.00105	Glt
CG8785	240.382	-1.87402	0.481577	-3.89142	9.96588e-05	0.00105974	CG8785
CG7744	140.614	-1.2452	0.32005	-3.89064	9.99783e-05	0.0010623	CG7744
CG15021	369.304	-1.48454	0.381654	-3.88975	0.000100347	0.00106538	CG15021
B52	1901.66	0.786593	0.202386	3.8866	0.00010166	0.00107846	B52
polo	121.539	1.98382	0.510485	3.88615	0.000101847	0.00107959	polo
CG13872	6.39212	6.91321	1.77955	3.88481	0.000102411	0.00108471	CG13872
CG11382	39.7553	-5.40382	1.39152	-3.88341	0.000103003	0.00109013	CG11382
CG11583	173.845	-1.13341	0.291934	-3.88241	0.000103424	0.00109373	CG11583
CG17754	245.521	1.19123	0.306955	3.88078	0.00010412	0.00110022	CG17754
Osi14	110.526	-5.25695	1.35504	-3.87955	0.000104648	0.00110493	Osi14
asRNA:CR44969	1061.88	-0.919278	0.237031	-3.87831	0.000105184	0.00110884	asRNA:CR44969
Prm	78572.3	1.00324	0.25868	3.87832	0.000105182	0.00110884	Prm
eIF4E1	2272.68	-0.619081	0.159652	-3.87769	0.000105451	0.00111079	eIF4E1
Ucp4A	197.952	0.942018	0.243128	3.87457	0.000106812	0.00112425	Ucp4A
Pxn	1736.37	-1.26626	0.327225	-3.86968	0.000108976	0.00114613	Pxn
Sptr	89.0502	-1.55544	0.401991	-3.86934	0.000109129	0.00114613	Sptr
Rgk3	330.194	1.02255	0.264272	3.8693	0.000109147	0.00114613	Rgk3
sha	68.4528	-6.78048	1.75371	-3.86638	0.000110464	0.00115906	sha
CG40486	358.705	-2.06431	0.534239	-3.86403	0.000111533	0.00116845	CG40486
Sardh	23.3444	2.98245	0.771828	3.86414	0.00011148	0.00116845	Sardh
Pgk	4088.57	0.935842	0.242371	3.86119	0.000112835	0.00118116	Pgk
puc	1170.93	-1.01412	0.262752	-3.85959	0.000113577	0.001188	puc
qless	771.117	-1.07943	0.279793	-3.85794	0.000114345	0.00119511	qless
CG31948	15.0816	6.41713	1.66376	3.85701	0.000114781	0.00119873	CG31948
CG34168	14.1046	8.06655	2.09159	3.85666	0.000114949	0.00119956	CG34168
CG42656	83.3575	1.8789	0.487442	3.85461	0.000115917	0.00120872	CG42656
mtg	241.504	-1.41105	0.366113	-3.85414	0.000116138	0.00121009	mtg
CG10132	620.927	1.01691	0.263892	3.85349	0.000116444	0.00121234	CG10132
CG10898	313.517	-0.922653	0.239587	-3.85101	0.00011763	0.00122337	CG10898
CG10660	70.2344	1.38147	0.35874	3.8509	0.000117686	0.00122337	CG10660
prd1	328.744	0.64466	0.167705	3.84402	0.000121038	0.00125582	prd1
Pkc98E	1611.46	0.831543	0.216321	3.84402	0.000121035	0.00125582	Pkc98E
tHMG1	14.1945	4.67774	1.21692	3.84391	0.000121088	0.00125582	tHMG1
CG15155	212.883	2.41485	0.628321	3.84334	0.00012137	0.00125777	CG15155
CG17672	71.6435	-4.26759	1.11116	-3.84066	0.000122705	0.00127063	CG17672
ADD1	361.582	0.655229	0.170632	3.84002	0.000123024	0.00127295	ADD1
Klp59C	9.57522	7.54461	1.96752	3.83458	0.000125779	0.00130046	Klp59C
CG30281	22.229	-3.32154	0.866818	-3.83187	0.000127171	0.00131082	CG30281
CG34331	119.529	-1.55256	0.405155	-3.83201	0.000127099	0.00131082	CG34331
Cyp12a5	464.934	0.709095	0.185044	3.83204	0.000127085	0.00131082	Cyp12a5
lncRNA:CR32652	31.3339	5.84375	1.525	3.83197	0.000127122	0.00131082	lncRNA:CR32652
CG9427	222.282	-1.01548	0.265077	-3.83091	0.000127673	0.00131498	CG9427
CG32365	40.7083	-2.40898	0.628993	-3.8299	0.000128193	0.00131933	CG32365
lncRNA:CR46431	23.8716	-3.65849	0.955903	-3.82726	0.000129578	0.00133256	lncRNA:CR46431
nyo	52.9509	-4.80167	1.25498	-3.8261	0.000130191	0.00133785	nyo
TwdlH	109.009	-10.6436	2.78263	-3.825	0.000130772	0.00134238	TwdlH
CG13046	157.195	-1.35421	0.354052	-3.82489	0.000130832	0.00134238	CG13046
pan	2069.45	1.13928	0.297937	3.82391	0.00013135	0.00134666	pan
vvl	2713.84	-1.00621	0.263191	-3.82312	0.000131774	0.00134999	vvl
CG42853	16.5211	5.90633	1.54596	3.82048	0.000133193	0.00136348	CG42853
CG7458	39.3392	-1.82442	0.477705	-3.81913	0.000133922	0.00136758	CG7458
Tep3	1694.7	-0.732379	0.191773	-3.81899	0.000134001	0.00136758	Tep3
CG4393	266.845	1.07782	0.282188	3.81953	0.000133709	0.00136758	CG4393
Act87E	38606.1	1.20755	0.316187	3.81911	0.000133934	0.00136758	Act87E
asRNA:CR43470	1087.11	-0.988717	0.25892	-3.81862	0.000134199	0.00136857	asRNA:CR43470
CG15213	401.676	-1.36866	0.359324	-3.80899	0.000139538	0.00141978	CG15213
CkIIalpha-i3	172.63	1.20782	0.317086	3.80913	0.000139459	0.00141978	CkIIalpha-i3
CG15293	184.124	2.14262	0.562509	3.80904	0.000139508	0.00141978	CG15293
CG11247	322.929	0.886713	0.233107	3.80389	0.000142441	0.00144822	CG11247
asRNA:CR45271	108.502	1.25838	0.331022	3.8015	0.000143821	0.00146005	asRNA:CR45271
CG10764	38.5528	1.851	0.486912	3.80151	0.000143818	0.00146005	CG10764
CG14995	924.347	-1.07447	0.282844	-3.79881	0.000145391	0.00147487	CG14995
cdm	704.368	0.703832	0.185332	3.79768	0.000146058	0.00148052	cdm
SrpRbeta	281.089	-1.10709	0.291771	-3.79436	0.000148024	0.00149932	SrpRbeta
Nna1	953.235	2.44393	0.644181	3.79386	0.000148325	0.00150123	Nna1
Lmpt	5068.25	0.791482	0.208708	3.79229	0.000149264	0.0015096	Lmpt
Cyp6g2	29.0617	2.36362	0.623587	3.79035	0.000150433	0.00152028	Cyp6g2
me31B	865.451	-0.69891	0.184506	-3.78801	0.000151861	0.00153355	me31B
SmD3	319.684	0.954549	0.252014	3.78769	0.000152056	0.00153437	SmD3
CG12129	106.906	-1.1238	0.296879	-3.78538	0.000153474	0.00154752	CG12129
cv	438.117	-1.13453	0.29975	-3.78493	0.00015375	0.00154915	cv
CG14830	1213.75	-0.977012	0.258164	-3.78446	0.00015404	0.0015509	CG14830
tx	357.256	-1.13701	0.300494	-3.78381	0.000154449	0.00155385	tx
CG31248	70.4862	-2.14538	0.567068	-3.78328	0.000154774	0.00155596	CG31248
Ugt35B1	22.3445	2.80358	0.741484	3.78104	0.000156175	0.00156887	Ugt35B1
dsx	48.589	1.61461	0.427603	3.77597	0.000159388	0.00159995	dsx
P5cr-2	47.1422	1.45453	0.385723	3.77093	0.000162643	0.00163141	P5cr-2
CG6454	758.738	0.741457	0.196769	3.76817	0.00016445	0.0016483	CG6454
CG9981	62.2512	3.50437	0.930133	3.76759	0.000164828	0.00165086	CG9981
CG32374	10.3415	-7.24637	1.9236	-3.76708	0.000165167	0.00165302	CG32374
CG43134	251.886	-2.32271	0.616655	-3.76663	0.000165463	0.00165352	CG43134
mt:srRNA	812.426	-1.08113	0.287015	-3.7668	0.000165355	0.00165352	mt:srRNA
CecB	6.39523	6.2399	1.65698	3.76582	0.000166001	0.00165766	CecB
Grip	166.741	-1.24103	0.329624	-3.76499	0.000166553	0.00166195	Grip
CG6026	141.049	-5.48426	1.45674	-3.76474	0.000166721	0.00166238	CG6026
Lcp65Ad	20.4844	-3.57589	0.950305	-3.76289	0.000167963	0.00167353	Lcp65Ad
Cpr97Eb	270.86	-1.4519	0.385894	-3.76244	0.000168266	0.0016753	Cpr97Eb
SPARC	591.356	-1.13029	0.300513	-3.76119	0.000169108	0.00168244	SPARC
CG10431	306.726	-0.653604	0.173802	-3.76062	0.000169492	0.00168501	CG10431
Gpdh3	150.806	1.14966	0.305845	3.75897	0.000170613	0.00169365	Gpdh3
CG30039	16.921	6.62547	1.76253	3.75906	0.000170553	0.00169365	CG30039
CG18641	100.423	-1.36611	0.363586	-3.75732	0.000171743	0.00170362	CG18641
Mipp1	549.002	-0.924165	0.24602	-3.75646	0.000172336	0.00170824	Mipp1
dnc	10197.4	1.15848	0.308419	3.7562	0.000172512	0.00170872	dnc
Dscam4	182.355	1.75751	0.46797	3.75559	0.000172933	0.00171163	Dscam4
CG14230	115.477	-1.12378	0.299394	-3.75351	0.000174374	0.00172462	CG14230
CG11920	101.559	-1.62642	0.433393	-3.75275	0.000174907	0.00172862	CG11920
CG31337	46.5062	-2.84733	0.759001	-3.75142	0.000175839	0.00173428	CG31337
Naus	272.891	0.939782	0.25051	3.75148	0.000175796	0.00173428	Naus
Cyp6d2	61.0962	1.6574	0.441812	3.75138	0.000175867	0.00173428	Cyp6d2
CG4866	68.941	-1.27838	0.340841	-3.75065	0.000176377	0.00173804	CG4866
grk	321.043	0.681753	0.181809	3.74982	0.00017696	0.0017425	grk
Osi20	365.46	-12.3888	3.30412	-3.74949	0.000177193	0.00174353	Osi20
Jheh3	382.986	0.918295	0.245017	3.74788	0.000178337	0.00175349	Jheh3
mge	440.693	-0.876017	0.23379	-3.74703	0.00017894	0.00175814	mge
AttD	17.522	5.10683	1.36313	3.7464	0.000179393	0.0017613	AttD
Osi18	104.863	-10.5826	2.82517	-3.74582	0.000179806	0.00176407	Osi18
CG46026	42.6187	-8.30134	2.21651	-3.74523	0.00018023	0.00176694	CG46026
pot	2677.09	-0.62557	0.16708	-3.74414	0.000181011	0.0017733	pot
TwdlV	9.04049	-7.05246	1.88393	-3.74348	0.000181486	0.00177666	TwdlV
CG34136	82.6871	1.8561	0.495857	3.74321	0.000181683	0.00177729	CG34136
Nmdmc	271.76	1.00404	0.268248	3.74295	0.000181872	0.00177784	Nmdmc
CG1234	186.695	-1.01265	0.27062	-3.74196	0.000182593	0.0017836	CG1234
CG31954	7.3172	-6.69286	1.78921	-3.74067	0.000183529	0.00179144	CG31954
wun	397.779	-0.662563	0.177172	-3.73965	0.000184275	0.00179742	wun
Fbp2	545.264	4.37391	1.16984	3.7389	0.00018483	0.00180152	Fbp2
CG6262	11.3083	5.84986	1.5672	3.73268	0.000189451	0.00184523	CG6262
rn	39.4986	3.79249	1.01635	3.73149	0.000190347	0.00185261	rn
CG14395	41.0045	-3.971	1.06436	-3.73088	0.000190812	0.00185579	CG14395
CalpC	226.901	-1.05671	0.283321	-3.72973	0.000191682	0.00186291	CalpC
mthl5	107.149	-1.67946	0.450402	-3.72879	0.000192399	0.00186852	mthl5
asRNA:CR45257	20.3136	-2.99833	0.804175	-3.72845	0.000192662	0.00186973	asRNA:CR45257
CG7110	135.211	-1.32612	0.355791	-3.72725	0.00019358	0.00187728	CG7110
Ciz1	1403.81	0.878194	0.235627	3.72705	0.000193735	0.00187743	Ciz1
Arf1	3976.5	-0.571573	0.153423	-3.72548	0.000194942	0.00188776	Arf1
CG30082	7.91013	4.09607	1.09965	3.72489	0.000195399	0.00189082	CG30082
geko	228.694	-1.00798	0.270629	-3.72456	0.000195657	0.00189196	geko
apn	28.6657	-5.35151	1.43726	-3.72342	0.000196544	0.00189918	apn
CG12535	635.443	-1.71944	0.462037	-3.72143	0.000198095	0.00191278	CG12535
CG10657	233.582	-1.50557	0.40472	-3.72002	0.000199211	0.00192218	CG10657
ArgRS	455.836	-0.799899	0.215056	-3.71948	0.000199631	0.00192485	ArgRS
Ugt301D1	71.2283	1.92059	0.516454	3.71881	0.000200165	0.00192861	Ugt301D1
sbr	836.817	0.604653	0.162615	3.71832	0.000200552	0.00193096	sbr
CG18598	28.9452	1.80983	0.486757	3.71814	0.000200698	0.00193098	CG18598
Drep4	619.001	0.840312	0.226034	3.71764	0.000201096	0.00193205	Drep4
CG18666	19.4647	2.35759	0.634157	3.71767	0.000201068	0.00193205	CG18666
CG1671	119.545	-1.51288	0.407124	-3.71601	0.000202393	0.00194035	CG1671
glec	321.044	-1.0675	0.287247	-3.7163	0.000202159	0.00194035	glec
NaPi-T	238.703	1.57752	0.424503	3.71615	0.00020228	0.00194035	NaPi-T
Cnot4	1615.82	0.445795	0.119974	3.71576	0.000202593	0.00194088	Cnot4
CG10877	248.41	-0.990729	0.266717	-3.71454	0.000203573	0.00194888	CG10877
CG42326	194.672	-1.54465	0.416122	-3.71201	0.000205618	0.00196706	CG42326
wtrw	421.01	1.0176	0.274362	3.70898	0.000208097	0.00198935	wtrw
mir-10404-4	173.296	-3.22399	0.869678	-3.70711	0.000209637	0.00200265	mir-10404-4
CG7409	85.5035	-1.77457	0.479019	-3.70458	0.000211737	0.00201985	CG7409
Bbd	1254.51	1.29668	0.350008	3.70472	0.000211626	0.00201985	Bbd
CG6340	423.455	0.828202	0.223667	3.70283	0.000213206	0.00203097	CG6340
Cyp6g1	42.3961	2.95929	0.799182	3.7029	0.000213145	0.00203097	Cyp6g1
mthl8	206.531	1.24221	0.335521	3.70234	0.000213623	0.0020335	mthl8
Ect3	45.206	2.09761	0.567477	3.69638	0.000218695	0.00208032	Ect3
CG13060	8.24133	-6.79977	1.83982	-3.69589	0.000219114	0.00208282	CG13060
CG7839	283.136	-1.06057	0.287115	-3.69388	0.000220858	0.00209791	CG7839
l(1)G0020	147.895	-1.18077	0.319833	-3.69183	0.000222648	0.00211342	l(1)G0020
Nak	1143.06	0.781692	0.211777	3.6911	0.000223286	0.00211799	Nak
BomS4	13.4608	3.77223	1.02211	3.69064	0.000223691	0.00212033	BomS4
yellow-b	506.501	-1.0125	0.274493	-3.68863	0.000225465	0.00213564	yellow-b
Swt1	301.237	1.04049	0.282191	3.6872	0.000226736	0.00214617	Swt1
Hmu	2423.48	-1.12804	0.305953	-3.68698	0.000226931	0.00214639	Hmu
CCT3	1127.74	-0.724982	0.196642	-3.68681	0.000227079	0.00214639	CCT3
CG31406	10.8641	5.89255	1.59858	3.68611	0.000227707	0.00215081	CG31406
CG11180	444.659	-1.0057	0.272849	-3.68592	0.000227879	0.00215093	CG11180
CG10211	2702.37	-1.59411	0.433158	-3.68021	0.000233045	0.00219814	CG10211
CG30355	13.13	3.65163	0.993386	3.67594	0.000236974	0.00223363	CG30355
Rcd1	520.841	0.686215	0.186799	3.67355	0.000239207	0.00225311	Rcd1
asRNA:CR43629	93.8338	-1.30192	0.354783	-3.66963	0.000242902	0.0022863	asRNA:CR43629
Naa80	653.409	1.31736	0.359076	3.66874	0.000243747	0.0022919	Naa80
CG14990	75.6743	1.48399	0.404505	3.66865	0.000243838	0.0022919	CG14990
tow	233.009	1.04802	0.285753	3.66759	0.000244849	0.0022998	tow
CG12877	160.603	0.875683	0.238775	3.6674	0.000245025	0.00229985	CG12877
Sulf1	417.092	0.877704	0.239395	3.66633	0.000246053	0.00230709	Sulf1
alpha-Est1	87.7901	1.66628	0.454493	3.66624	0.00024614	0.00230709	alpha-Est1
Optix	15.1191	4.76169	1.29888	3.66599	0.000246386	0.00230779	Optix
b6	22.2325	-3.9759	1.08479	-3.66513	0.000247218	0.00231396	b6
CG14957	72.8528	1.74084	0.475219	3.66324	0.000249041	0.0023291	CG14957
CG17376	22.3813	5.71856	1.56113	3.6631	0.000249182	0.0023291	CG17376
CG42494	231.821	1.13397	0.30971	3.6614	0.000250844	0.00234139	CG42494
Lcp4	57218.9	1.31654	0.359568	3.66144	0.000250802	0.00234139	Lcp4
CG15225	795.254	-9.63167	2.63077	-3.66116	0.000251076	0.00234192	CG15225
Tpi	10169.2	1.22339	0.334277	3.65981	0.000252402	0.00235266	Tpi
flr	2147.24	0.70165	0.191736	3.65947	0.000252742	0.00235419	flr
Col4a1	4481.93	-1.25902	0.344102	-3.65887	0.000253325	0.002358	Col4a1
GNBP2	79.8403	-1.8884	0.516606	-3.65539	0.000256787	0.00238856	GNBP2
Rgl	639.582	-0.667779	0.182778	-3.6535	0.000258694	0.00240463	Rgl
CG9498	207.225	-1.16879	0.31998	-3.65271	0.000259484	0.00241031	CG9498
Pglym78	5741.56	1.10737	0.303247	3.65171	0.0002605	0.00241808	Pglym78
pre-mod(mdg4)-X	253.767	0.889408	0.243648	3.65039	0.000261847	0.00242891	pre-mod(mdg4)-X
CG11044	253.318	1.70499	0.467507	3.64699	0.000265335	0.00245957	CG11044
GluRIIA	518.098	0.588284	0.161317	3.64676	0.000265564	0.00245999	GluRIIA
CG43133	15.8936	2.38142	0.65314	3.64612	0.000266231	0.00246447	CG43133
JYalpha	21.996	2.87148	0.787756	3.64514	0.000267246	0.00247216	JYalpha
CG15408	61.7328	2.19055	0.601326	3.64287	0.000269615	0.00249087	CG15408
CG42847	19.3537	2.9402	0.807117	3.64285	0.000269638	0.00249087	CG42847
sav	203.841	0.740382	0.20329	3.642	0.000270531	0.0024974	sav
Hf	63.9233	2.17088	0.596345	3.6403	0.000272315	0.00251214	Hf
Vps29	390.946	0.769551	0.211547	3.63774	0.000275046	0.00253559	Vps29
asRNA:CR45341	49.0212	-1.96349	0.540536	-3.63248	0.00028071	0.00258603	asRNA:CR45341
Pdss2	142.173	-1.00473	0.276636	-3.63195	0.000281288	0.00258958	Pdss2
CG8492	2007.29	-1.16119	0.319881	-3.63007	0.00028334	0.00260669	CG8492
CG10621	98.0794	2.25305	0.620823	3.62914	0.000284365	0.00261433	CG10621
CG15279	329.104	-1.44052	0.3971	-3.62761	0.000286055	0.00262807	CG15279
CG31036	39.0691	-1.80025	0.496484	-3.62599	0.00028786	0.00264284	CG31036
sbm	3710.23	1.23004	0.339249	3.62578	0.00028809	0.00264315	sbm
yellow-e3	10.5899	4.27517	1.17918	3.62556	0.000288334	0.00264359	yellow-e3
thw	1950.64	-1.27317	0.351408	-3.62307	0.000291126	0.00266399	thw
Strica	175.461	-0.979348	0.270297	-3.62323	0.000290942	0.00266399	Strica
dj	62.369	6.54932	1.80768	3.62305	0.000291154	0.00266399	dj
CAH13	17.6155	4.30152	1.18785	3.62126	0.000293172	0.00268063	CAH13
CG31522	1374.68	-1.10513	0.305201	-3.62098	0.000293488	0.00268169	CG31522
Tsp42Ee	3026.95	-1.0358	0.286104	-3.62037	0.000294187	0.00268625	Tsp42Ee
Ipp	219.763	1.22691	0.33898	3.61941	0.000295279	0.00269439	Ipp
CG12861	17.1172	5.64246	1.5596	3.61789	0.000297019	0.00270844	CG12861
Spn77Ba	739.605	-1.09618	0.303021	-3.61749	0.00029747	0.00271071	Spn77Ba
Tpc2	75.0265	-3.06505	0.848102	-3.61401	0.000301494	0.00274537	Tpc2
asRNA:CR44894	108.197	1.25639	0.347658	3.61385	0.000301682	0.00274537	asRNA:CR44894
asRNA:CR44987	429.814	1.01523	0.281038	3.61242	0.000303347	0.00275865	asRNA:CR44987
salm	317.297	-1.0061	0.278547	-3.61195	0.000303908	0.00276188	salm
CG6550	116.81	-1.07657	0.29838	-3.60806	0.000308492	0.00280165	CG6550
CG2663	100.307	-5.33008	1.47756	-3.60735	0.000309338	0.00280677	CG2663
Galk	199.268	1.09194	0.302709	3.60724	0.000309473	0.00280677	Galk
CCT5	1168.6	-0.666946	0.184931	-3.60645	0.000310411	0.00281338	CCT5
vkg	2688.2	-1.30239	0.361284	-3.60489	0.000312287	0.00282847	vkg
par-6	414.426	-0.583819	0.161964	-3.60462	0.000312606	0.00282945	par-6
lncRNA:CR44273	26.6147	-2.57108	0.71345	-3.60372	0.000313691	0.00283736	lncRNA:CR44273
Start1	189.654	0.788426	0.218841	3.60274	0.000314879	0.00284619	Start1
CG18324	140.967	0.862004	0.239278	3.60253	0.000315137	0.00284661	CG18324
sut2	76.23	-1.69069	0.469392	-3.60188	0.000315923	0.00285179	sut2
CG17780	10.2383	-7.16469	1.99058	-3.59929	0.000319086	0.00287738	CG17780
Hsp70Ba	23.9396	-4.1564	1.15486	-3.59904	0.000319399	0.00287738	Hsp70Ba
CG5174	1278.17	-0.461334	0.128179	-3.59914	0.000319268	0.00287738	CG5174
ogre	1003.4	-0.805349	0.223853	-3.59767	0.000321076	0.00288861	ogre
SmydA-7	82.0659	1.07806	0.299647	3.59776	0.000320966	0.00288861	SmydA-7
CG6652	19.578	4.86658	1.35354	3.59545	0.000323834	0.00291148	CG6652
asRNA:CR44137	179.015	-1.00393	0.279495	-3.59193	0.00032824	0.00294911	asRNA:CR44137
CG14322	714.695	0.777523	0.216561	3.59032	0.000330276	0.00296543	CG14322
und	1504.89	-0.688159	0.191775	-3.58837	0.000332749	0.00298563	und
E(spl)mbeta-HLH	147.216	-1.55468	0.433327	-3.58778	0.000333508	0.00298845	E(spl)mbeta-HLH
Gasp	10459.4	-1.26699	0.353139	-3.5878	0.000333485	0.00298845	Gasp
SP1029	757.95	-3.30526	0.921849	-3.58547	0.000336477	0.00300904	SP1029
Sgsh	281.276	-1.04831	0.292371	-3.58554	0.000336378	0.00300904	Sgsh
Doa	3547.63	1.05549	0.294381	3.58547	0.000336477	0.00300904	Doa
Shab	823.302	1.40557	0.392142	3.58434	0.000337925	0.00301998	Shab
Sf3b6	409.713	-0.917442	0.255997	-3.58379	0.000338639	0.00302307	Sf3b6
Bfc	17.1243	4.34204	1.2116	3.58373	0.00033872	0.00302307	Bfc
CG15019	479	-1.12428	0.313859	-3.58213	0.000340802	0.00303963	CG15019
CG14153	20.6327	-3.82155	1.06703	-3.58149	0.000341635	0.00304504	CG14153
vig2	1461.79	-0.466555	0.130303	-3.58053	0.000342898	0.00305427	vig2
CG43897	34949	0.952524	0.266044	3.58032	0.000343174	0.0030547	CG43897
Act57B	501285	0.888246	0.248122	3.57988	0.000343755	0.00305785	Act57B
Gapdh2	21849.1	0.897129	0.250734	3.57801	0.000346225	0.00307575	Gapdh2
Dh44-R2	527.39	0.968371	0.270637	3.57812	0.000346075	0.00307575	Dh44-R2
Nmd3	306.47	-1.0852	0.303314	-3.57781	0.000346479	0.00307598	Nmd3
CG3085	51.0253	1.55076	0.433637	3.57617	0.000348667	0.00309335	CG3085
CG10799	155.809	1.93372	0.540938	3.57476	0.000350553	0.00310803	CG10799
mir-9373	28.4564	-2.08712	0.58388	-3.57457	0.000350808	0.00310825	mir-9373
CG1273	137.988	-3.50498	0.980906	-3.57321	0.000352632	0.00312235	CG1273
Rh5	10.4045	4.38399	1.2277	3.57091	0.00035575	0.00314581	Rh5
lncRNA:CR43278	7.65904	7.18595	2.01234	3.57095	0.000355695	0.00314581	lncRNA:CR43278
Idh	2138.28	-0.656525	0.184001	-3.56804	0.000359656	0.00317777	Idh
Dab	1240.48	1.0554	0.295803	3.56791	0.000359837	0.00317777	Dab
CG3817	66.7053	-1.39859	0.392118	-3.56676	0.000361424	0.00318969	CG3817
CG10550	457.888	-1.07571	0.301622	-3.56642	0.000361885	0.00319166	CG10550
Tango9	674.624	0.65338	0.183257	3.56538	0.00036333	0.00319811	Tango9
Ppt2	239.879	1.11817	0.313598	3.56563	0.000362989	0.00319811	Ppt2
mud	150.396	1.56951	0.440205	3.56541	0.000363287	0.00319811	mud
PK2-R2	595.742	-0.914383	0.256515	-3.56464	0.000364356	0.00320505	PK2-R2
Muc4B	11.7638	-4.05627	1.138	-3.56438	0.000364718	0.00320613	Muc4B
r	524.346	-1.17856	0.330714	-3.56367	0.000365706	0.00321271	r
gfzf	727.53	-0.822973	0.231108	-3.56099	0.000369454	0.00324352	gfzf
CG17738	3093.67	-1.75142	0.492264	-3.5579	0.000373833	0.00327982	CG17738
CG8272	129.894	0.979743	0.275392	3.55763	0.000374215	0.00328103	CG8272
cbt	1773.89	-1.37445	0.386426	-3.55682	0.000375367	0.00328899	cbt
lncRNA:CR43461	14.5494	2.6534	0.746246	3.55566	0.000377029	0.0033014	lncRNA:CR43461
mt:tRNA:Tyr-GTA	71.473	-2.45529	0.690998	-3.55326	0.000380492	0.00332955	mt:tRNA:Tyr-GTA
CG13728	14.474	-4.55917	1.28328	-3.55276	0.000381206	0.00333363	CG13728
APC7	48.1525	1.64941	0.464356	3.55203	0.000382264	0.00334071	APC7
en	85.6389	1.49825	0.421997	3.55037	0.000384686	0.00335969	en
CG5768	6.88383	-5.84778	1.65037	-3.54331	0.000395134	0.0034487	CG5768
AnxB11	1130.33	-0.575141	0.162343	-3.54275	0.000395974	0.00345379	AnxB11
CG3588	6168.18	-0.934353	0.263801	-3.54188	0.000397281	0.00346294	CG3588
CG9920	32.0803	3.27675	0.925237	3.54152	0.000397824	0.00346542	CG9920
scaf6	475.983	0.799207	0.225825	3.53906	0.00040156	0.00349571	scaf6
Cyp313a4	43.2267	-1.70517	0.48269	-3.53263	0.000411444	0.00357943	Cyp313a4
CG43103	147.344	-1.16081	0.328714	-3.53137	0.000413408	0.00359419	CG43103
CG2321	366.056	0.873813	0.247509	3.53042	0.000414897	0.0036048	CG2321
Mpcp1	2372.51	1.14383	0.324073	3.52955	0.000416269	0.00361439	Mpcp1
CG7966	311.092	-0.923794	0.261919	-3.52702	0.000420265	0.00364673	CG7966
CG43394	546	-1.23064	0.348977	-3.52641	0.000421241	0.00365284	CG43394
CG7860	88.7527	1.59161	0.451813	3.52271	0.000427165	0.00370182	CG7860
Gdh	9668.64	1.18917	0.33789	3.51941	0.000432504	0.00374567	Gdh
asRNA:CR45804	135.761	-1.3841	0.393464	-3.51773	0.000435259	0.00376711	asRNA:CR45804
CG8389	126.936	0.870141	0.247582	3.51456	0.000440478	0.00380982	CG8389
asRNA:CR44416	59.7915	-1.46201	0.416184	-3.51288	0.000443275	0.00383155	asRNA:CR44416
ImpE2	388.425	-5.02271	1.43017	-3.51197	0.000444799	0.00383978	ImpE2
CG1544	74.0587	2.40577	0.685011	3.51202	0.000444722	0.00383978	CG1544
CG9616	18.6036	2.76753	0.788385	3.51038	0.000447465	0.00386032	CG9616
CG3097	142.642	-1.58607	0.452208	-3.5074	0.000452514	0.00390137	CG3097
Acsx1R	96.783	2.21551	0.63172	3.50711	0.000453005	0.0039031	Acsx1R
5.8SrRNA-Psi:CR45857	21.0148	2.7639	0.788257	3.50634	0.000454316	0.00391189	5.8SrRNA-Psi:CR45857
CG3808	120.724	-1.0669	0.304597	-3.50266	0.000460643	0.00396129	CG3808
mir-281-2	112.294	1.2779	0.364824	3.5028	0.000460403	0.00396129	mir-281-2
asRNA:CR45682	236.586	-1.4115	0.40301	-3.5024	0.000461093	0.00396263	asRNA:CR45682
sage	48.1738	2.9494	0.842207	3.50199	0.000461794	0.00396586	sage
COX4L	12.1664	3.67222	1.04865	3.50184	0.000462059	0.00396586	COX4L
GstD10	253.843	-1.21858	0.348144	-3.50021	0.000464894	0.00398256	GstD10
CG11555	158.37	-1.0495	0.299811	-3.50054	0.000464323	0.00398256	CG11555
Galphai	462.762	-0.69254	0.197851	-3.50031	0.000464716	0.00398256	Galphai
sut4	10.2749	5.89207	1.68399	3.49887	0.000467234	0.00400006	sut4
CG33267	158.214	-2.73691	0.782604	-3.49718	0.000470203	0.00402291	CG33267
Alp13	11.1801	3.17941	0.909271	3.49666	0.000471122	0.00402821	Alp13
Nsun2	174.238	-1.17714	0.336748	-3.49562	0.000472967	0.00404142	Nsun2
Ets21C	209.984	-1.52656	0.437086	-3.49259	0.000478366	0.00408495	Ets21C
Acer	598.9	0.642856	0.184139	3.49114	0.000480957	0.00410447	Acer
Hr3	497.745	-4.91832	1.40888	-3.49095	0.000481304	0.00410483	Hr3
SLC22A	57.7436	-1.88507	0.540982	-3.48454	0.000492977	0.00420171	SLC22A
GEFmeso	597.979	0.778832	0.223546	3.48399	0.000493995	0.00420772	GEFmeso
Cwc25	406.676	0.877701	0.251971	3.48334	0.000495204	0.00421535	Cwc25
Sac1	670.301	-0.535578	0.153778	-3.4828	0.000496205	0.0042212	Sac1
snoRNA:660	127159	0.968911	0.278287	3.4817	0.000498241	0.00423584	snoRNA:660
CG10939	1158.01	-0.763234	0.21942	-3.47841	0.000504393	0.00428205	CG10939
GstD9	259.968	-0.760267	0.218586	-3.47812	0.000504952	0.00428205	GstD9
bocks	291.491	-0.694068	0.19953	-3.47852	0.000504197	0.00428205	bocks
CG14053	9.69916	3.14654	0.904633	3.47825	0.000504697	0.00428205	CG14053
5.8SrRNA-Psi:CR45863	177.347	-2.9681	0.853411	-3.47792	0.000505313	0.00428242	5.8SrRNA-Psi:CR45863
mir-4954	61.5756	2.24903	0.64679	3.47721	0.000506663	0.00429115	mir-4954
Tsp42Eh	165.927	1.15212	0.331432	3.4762	0.000508575	0.00430463	Tsp42Eh
CG15706	227.737	0.980825	0.282222	3.47537	0.000510146	0.00431521	CG15706
CG14661	67.3215	-1.84801	0.531833	-3.47479	0.000511253	0.00432186	CG14661
5.8SrRNA:CR40454	44.7298	-3.72004	1.0709	-3.47376	0.00051322	0.00433576	5.8SrRNA:CR40454
CG6726	370.924	1.0337	0.297672	3.47262	0.000515406	0.00435149	CG6726
CG31997	2414.23	-0.815733	0.234923	-3.47234	0.000515937	0.00435163	CG31997
g	591.123	0.816169	0.235053	3.47227	0.00051607	0.00435163	g
CG8501	118.183	-1.64668	0.47454	-3.47005	0.000520353	0.00438499	CG8501
CG6073	68.8762	-1.33342	0.384355	-3.46923	0.000521962	0.00439405	CG6073
Prat2	39.6297	2.92243	0.842402	3.46916	0.000522081	0.00439405	Prat2
CG12689	6.31706	6.98028	2.01282	3.46792	0.000524508	0.00441171	CG12689
rdgB	651.771	1.08622	0.313327	3.46672	0.000526854	0.00442867	rdgB
Smyd4-4	220.106	-0.66091	0.1907	-3.46569	0.000528863	0.00444278	Smyd4-4
Cpr64Ab	42.1056	-9.2442	2.6677	-3.46523	0.00052978	0.00444492	Cpr64Ab
4E-T	986.845	0.495919	0.14311	3.4653	0.000529635	0.00444492	4E-T
Pgm2a	485.143	0.584497	0.168826	3.46213	0.000535912	0.00449357	Pgm2a
CG17110	372.512	1.03506	0.299041	3.46128	0.000537622	0.0045051	CG17110
CG13101	118.606	-1.11215	0.321409	-3.46021	0.000539747	0.00452009	CG13101
Pkn	1456.53	0.911312	0.263405	3.45973	0.000540714	0.00452537	Pkn
CG1324	15.9427	4.03394	1.16725	3.45594	0.000548386	0.00458672	CG1324
lbl	42.1401	-1.70089	0.492358	-3.45459	0.000551133	0.00460682	lbl
CG2865	1162.05	-0.750309	0.217286	-3.4531	0.000554189	0.00462662	CG2865
cas	76.9782	3.18191	0.921434	3.45321	0.000553952	0.00462662	cas
Ance	1023.98	-1.85767	0.538268	-3.45121	0.000558079	0.0046552	Ance
eIF2beta	1318.47	-0.516359	0.149624	-3.45105	0.000558401	0.0046552	eIF2beta
lncRNA:CR32660	22.518	3.11436	0.902468	3.45093	0.000558651	0.0046552	lncRNA:CR32660
CG1812	371.957	0.970711	0.281331	3.45042	0.000559715	0.00466117	CG1812
PIG-N	119.16	1.02369	0.29672	3.45	0.000560577	0.00466546	PIG-N
CG2218	238.323	0.712498	0.206553	3.44946	0.000561699	0.00466902	CG2218
asRNA:CR46473	158.241	1.50961	0.437623	3.44957	0.000561481	0.00466902	asRNA:CR46473
djl	12.1113	3.5861	1.0397	3.44916	0.000562343	0.00467148	djl
ebd1	89.8286	0.947121	0.274623	3.4488	0.000563074	0.00467466	ebd1
Tsf1	1325.51	1.36218	0.395331	3.44568	0.000569624	0.00472612	Tsf1
DAT	45.8694	-2.24561	0.651845	-3.445	0.00057105	0.00473503	DAT
CG2955	25.0473	6.15329	1.78687	3.44361	0.000574011	0.00475664	CG2955
Klp59D	11.4748	7.79911	2.26533	3.44281	0.0005757	0.00476771	Klp59D
asRNA:CR43908	139.557	5.16322	1.50057	3.44084	0.000579906	0.00479958	asRNA:CR43908
Hsc70Cb	2142.19	-0.732723	0.213065	-3.43896	0.00058396	0.00482844	Hsc70Cb
CG31380	20.8862	2.58981	0.753094	3.43889	0.000584111	0.00482844	CG31380
CG3631	150.343	1.12307	0.326646	3.43819	0.000585607	0.00483782	CG3631
His3.3B	6111.45	-0.929953	0.270499	-3.43791	0.00058622	0.00483992	His3.3B
Acsf2	398.971	-1.15202	0.335291	-3.43587	0.000590657	0.00486793	Acsf2
CG10444	397.505	-1.05942	0.308372	-3.43554	0.000591377	0.00486793	CG10444
CG32756	87.6124	1.05693	0.307647	3.43552	0.000591424	0.00486793	CG32756
Cdc6	173.227	1.19412	0.347561	3.43571	0.000590997	0.00486793	Cdc6
CG12868	74.9397	1.20465	0.350622	3.43576	0.00059089	0.00486793	CG12868
E(spl)mgamma-HLH	14.8014	3.0061	0.875151	3.43495	0.000592668	0.00487519	E(spl)mgamma-HLH
CG34273	20.3435	-3.69026	1.07441	-3.43467	0.000593277	0.00487721	CG34273
wat	908.494	-0.667119	0.194315	-3.43319	0.000596529	0.00490094	wat
emc	1198.03	-0.900607	0.262691	-3.42839	0.000607179	0.0049854	emc
Polr1F	68.1641	-1.21831	0.355429	-3.42771	0.000608703	0.00499486	Polr1F
Lpin	1312.31	0.938277	0.273958	3.42489	0.000615044	0.00504381	Lpin
Daao1	85.2503	1.22571	0.357923	3.42452	0.000615889	0.00504766	Daao1
CG46321	460.592	-5.51989	1.61217	-3.42389	0.000617308	0.00505313	CG46321
kirre	246.977	-0.926078	0.270474	-3.42391	0.000617268	0.00505313	kirre
PMCA	7781.81	-0.605268	0.176845	-3.4226	0.000620259	0.0050742	PMCA
hoip	115.267	-1.71943	0.502688	-3.42046	0.000625144	0.00511105	hoip
neo	464.973	-4.34237	1.26963	-3.4202	0.000625756	0.00511273	neo
CG15741	140.722	5.13886	1.50257	3.42004	0.00062611	0.00511273	CG15741
Ak6	73.0915	-1.19017	0.3482	-3.41807	0.000630664	0.00514366	Ak6
bbx	1074.53	0.663294	0.194049	3.41818	0.000630422	0.00514366	bbx
Neurochondrin	3664.07	0.712497	0.208472	3.41771	0.000631497	0.00514734	Neurochondrin
cass	1528.24	0.633256	0.185327	3.41696	0.000633254	0.00515852	cass
CG6310	106.077	-1.26484	0.37028	-3.41591	0.000635701	0.00517533	CG6310
Cpr66Cb	43.8609	-8.3498	2.4447	-3.41547	0.000636721	0.00518049	Cpr66Cb
CG4702	97.5836	-4.97271	1.45611	-3.41506	0.000637688	0.00518522	CG4702
Pax	11337	0.922708	0.270446	3.4118	0.000645343	0.00524429	Pax
CG43954	707.29	-0.815211	0.239087	-3.40969	0.000650373	0.00527878	CG43954
Lasp	707.29	-0.815211	0.239087	-3.40969	0.000650373	0.00527878	Lasp
CG7296	2553.34	0.779277	0.22873	3.40697	0.000656874	0.00532833	CG7296
lncRNA:CR44899	11.2518	2.61431	0.767571	3.40595	0.000659343	0.00534191	lncRNA:CR44899
CR33318	10.332	4.80092	1.40954	3.40603	0.000659153	0.00534191	CR33318
RhoGAP68F	595.487	0.642789	0.188751	3.40549	0.000660459	0.00534773	RhoGAP68F
udt	665.642	-0.863998	0.253811	-3.4041	0.000663815	0.00537167	udt
Hsp70Bc	275.883	-4.21978	1.2398	-3.4036	0.000665052	0.00537844	Hsp70Bc
l(3)72Dn	74.882	-1.78619	0.525424	-3.39953	0.000675026	0.00545582	l(3)72Dn
waw	1062.5	0.656953	0.193294	3.39873	0.000677006	0.00546854	waw
Rab6	700.75	-0.745861	0.219578	-3.39679	0.000681801	0.00550396	Rab6
CG10252	17.066	5.58001	1.64398	3.3942	0.000688298	0.00555307	CG10252
CG46491	236.69	0.822873	0.242533	3.39283	0.000691736	0.00557746	CG46491
CG5292	161.029	-1.14976	0.339015	-3.39147	0.000695193	0.00559526	CG5292
by	2132.97	-0.492447	0.145188	-3.39179	0.000694378	0.00559526	by
sing	275.863	0.709863	0.209303	3.39155	0.000694992	0.00559526	sing
lncRNA:CR43653	26.8506	-2.50362	0.738844	-3.38856	0.000702605	0.00565153	lncRNA:CR43653
Ir48a	7.84232	5.35696	1.58137	3.38754	0.00070522	0.00566918	Ir48a
Pepck2	270.06	1.38119	0.407889	3.3862	0.000708685	0.00569363	Pepck2
CG3788	47.861	1.51415	0.447242	3.38554	0.000710394	0.00570395	CG3788
Lst	1266.02	-0.979174	0.289373	-3.38377	0.000714966	0.00573723	Lst
CG43325	214.131	1.20212	0.355421	3.38224	0.000718974	0.00576251	CG43325
CG43326	214.131	1.20212	0.355421	3.38224	0.000718974	0.00576251	CG43326
CG13896	45.4087	1.3752	0.40678	3.38069	0.000723045	0.00579169	CG13896
Tsp42Ed	91.1371	1.79474	0.531165	3.37887	0.000727833	0.00582657	Tsp42Ed
CG4250	33.394	-2.10477	0.623092	-3.37794	0.000730313	0.00584294	CG4250
Cpr60D	3113.25	-1.50037	0.44421	-3.37761	0.000731181	0.00584641	Cpr60D
Usp2	2861.22	0.772918	0.228865	3.37719	0.000732314	0.00585198	Usp2
cysu	175.935	-2.59192	0.767792	-3.37581	0.000735974	0.00587076	cysu
Cyp6a13	75.385	1.02446	0.30347	3.37584	0.000735919	0.00587076	Cyp6a13
CG31183	79.2029	2.89244	0.85681	3.37582	0.00073595	0.00587076	CG31183
CG6231	1611.25	-0.677799	0.2008	-3.37549	0.000736851	0.00587427	CG6231
CG17219	48.1174	-1.57807	0.467692	-3.37416	0.00074042	0.00589922	CG17219
Tsp42El	1170.86	-1.08221	0.321055	-3.37079	0.000749531	0.00596827	Tsp42El
CG44303	75.7889	1.23856	0.367468	3.37053	0.000750224	0.00597026	CG44303
CG9297	34638.5	0.934565	0.277307	3.37015	0.000751276	0.00597509	CG9297
Ude	2171.42	-0.906346	0.268975	-3.36963	0.000752696	0.00598284	Ude
mt:tRNA:Cys-GCA	37.8328	-2.52086	0.749049	-3.36542	0.000764278	0.00607131	mt:tRNA:Cys-GCA
Sirt1	759.083	-0.502442	0.149313	-3.36502	0.00076537	0.0060764	Sirt1
CG8420	183.111	-4.05098	1.20423	-3.36397	0.000768312	0.00609615	CG8420
CG16727	324.828	1.8384	0.546816	3.36201	0.000773762	0.00613577	CG16727
Ak3	338.408	-0.712738	0.21208	-3.36071	0.000777424	0.00616118	Ak3
CG43179	17.6288	2.72948	0.812686	3.35859	0.000783414	0.00620499	CG43179
asRNA:CR45995	204.458	-7.48862	2.23079	-3.35694	0.000788116	0.00623856	asRNA:CR45995
Gapdh1	33903.5	1.02507	0.305386	3.35663	0.000788998	0.00624186	Gapdh1
CG7637	69.081	-1.50539	0.448669	-3.35524	0.000792975	0.00626963	CG7637
corn	625.199	0.766721	0.228612	3.35381	0.000797057	0.0062982	corn
Sox102F	217.208	0.855184	0.255064	3.35282	0.000799936	0.00631724	Sox102F
Cad74A	776.32	-0.987439	0.29454	-3.35248	0.000800914	0.00632125	Cad74A
RpL7-like	746.023	-1.20818	0.360532	-3.3511	0.000804905	0.00634529	RpL7-like
CG34164	746.023	-1.20818	0.360532	-3.3511	0.000804905	0.00634529	CG34164
Ns2	669.396	-0.923668	0.275859	-3.34833	0.000813005	0.00640412	Ns2
Hez	129.257	0.863226	0.257829	3.34806	0.000813796	0.00640412	Hez
CG6709	129.257	0.863226	0.257829	3.34806	0.000813796	0.00640412	CG6709
asRNA:CR44054	47.4829	1.33746	0.399618	3.34684	0.000817375	0.00642852	asRNA:CR44054
Cyp6d5	411.426	1.35195	0.404067	3.34584	0.000820323	0.00644793	Cyp6d5
CG14621	334.289	-0.918031	0.274471	-3.34472	0.000823645	0.00647026	CG14621
Dis3	209.221	-0.73087	0.218628	-3.34298	0.000828842	0.0065037	Dis3
fend	80.3886	1.44918	0.433502	3.34297	0.00082887	0.0065037	fend
lncRNA:CR32690	13.2181	3.21405	0.961536	3.34262	0.000829905	0.00650803	lncRNA:CR32690
CG6276	135.229	0.743439	0.222431	3.34233	0.000830773	0.00651103	CG6276
CG4511	577.426	-0.509541	0.152496	-3.34134	0.000833736	0.00653045	CG4511
CG12983	14.4903	4.92281	1.47354	3.3408	0.000835384	0.00653954	CG12983
rt	244.473	-1.30561	0.390888	-3.34012	0.000837422	0.00655168	rt
asRNA:CR45943	127.33	-1.48392	0.444352	-3.33951	0.000839254	0.0065622	asRNA:CR45943
CG1575	75.7917	-1.01226	0.303174	-3.33888	0.000841159	0.00657326	CG1575
CG45105	39.5557	-1.64264	0.492067	-3.33826	0.000843058	0.00658428	CG45105
pelo	363.42	-0.687845	0.206066	-3.33799	0.000843882	0.00658688	pelo
Cbp53E	352.638	-0.924012	0.276999	-3.3358	0.000850548	0.00663506	Cbp53E
CG34184	8.25632	-5.24708	1.57322	-3.33525	0.000852227	0.00664431	CG34184
UK114	124.052	1.38048	0.414026	3.33429	0.000855172	0.0066634	UK114
CG42748	2451.91	-0.637795	0.191327	-3.33353	0.000857503	0.00667769	CG42748
Adar	734.297	0.80091	0.240306	3.33288	0.000859535	0.00668964	Adar
Spn27A	1102.07	-0.845768	0.253838	-3.33191	0.000862514	0.00670894	Spn27A
CG12075	1470.17	-0.830556	0.249295	-3.33162	0.000863431	0.00671219	CG12075
Ir51b	31.8711	2.16465	0.650028	3.33009	0.000868185	0.00674524	Ir51b
CG15556	24.513	2.00028	0.600802	3.32936	0.000870465	0.00675905	CG15556
CG13133	39.2882	-1.97406	0.593051	-3.32865	0.000872684	0.00677237	CG13133
Ptpmeg2	1398.74	0.609978	0.183264	3.32842	0.000873403	0.00677404	Ptpmeg2
CG34281	5.62471	-6.33364	1.9031	-3.32807	0.000874513	0.00677483	CG34281
CG32371	11.5012	6.01684	1.80785	3.32818	0.000874155	0.00677483	CG32371
CG33169	59.6246	-1.15716	0.347957	-3.32559	0.00088233	0.00683145	CG33169
lncRNA:roX2	142.606	1.56705	0.471301	3.32495	0.000884338	0.00684306	lncRNA:roX2
eIF4A	16973.4	-0.57125	0.171832	-3.32446	0.000885911	0.00685128	eIF4A
lncRNA:CR43196	43.0169	1.64718	0.495766	3.32249	0.000892192	0.00689589	lncRNA:CR43196
Tmc	84.4795	-1.32846	0.399874	-3.3222	0.000893112	0.00689903	Tmc
ect	1315.24	-1.8186	0.547762	-3.32005	0.000900017	0.00694439	ect
msps	1601.67	-0.538537	0.1622	-3.3202	0.00089954	0.00694439	msps
CG15118	411.814	0.586267	0.1766	3.31976	0.000900963	0.0069477	CG15118
ImpE3	37.7568	-2.64158	0.795841	-3.31923	0.000902657	0.00695279	ImpE3
uif	4056.23	-1.59532	0.480625	-3.31927	0.00090254	0.00695279	uif
CG14340	11.6154	-4.45731	1.343	-3.3189	0.000903712	0.00695693	CG14340
CG14421	111.216	-7.02171	2.11614	-3.31817	0.000906092	0.00696907	CG14421
CG13116	45.2675	-2.67887	0.807352	-3.3181	0.000906326	0.00696907	CG13116
Ugt36D1	104.625	-1.34753	0.406176	-3.31761	0.000907924	0.00697736	Ugt36D1
Dup99B	10.2046	-4.21748	1.2713	-3.31745	0.000908447	0.00697739	Dup99B
CG13255	151.242	-1.48162	0.446851	-3.31569	0.000914181	0.00701742	CG13255
CG6041	30.2848	1.7017	0.513251	3.31553	0.000914702	0.00701742	CG6041
sv	43.7534	-1.70555	0.51481	-3.31297	0.000923122	0.00707702	sv
CG31793	266.154	-1.05958	0.31984	-3.31284	0.000923525	0.00707702	CG31793
CG43980	95.6598	-2.86992	0.866549	-3.3119	0.000926653	0.00709695	CG43980
HDAC4	1464.55	0.687392	0.207622	3.31078	0.000930353	0.00712123	HDAC4
CG34278	68.6911	3.32678	1.00503	3.31013	0.000932529	0.00713382	CG34278
lncRNA:CR46110	6.3726	-6.28233	1.89846	-3.30918	0.000935704	0.00714185	lncRNA:CR46110
ImpE1	263.983	-3.94954	1.19344	-3.30939	0.000935011	0.00714185	ImpE1
nrv2	1123.3	-0.725558	0.219229	-3.30959	0.000934315	0.00714185	nrv2
CG9795	484.841	0.565409	0.170859	3.30921	0.000935581	0.00714185	CG9795
Cyp12d1-p	9.52873	3.39128	1.02496	3.3087	0.000937311	0.00715006	Cyp12d1-p
hppy	518.571	0.818722	0.247627	3.30627	0.000945483	0.0072083	hppy
lncRNA:CR45954	6.09676	-6.23869	1.88741	-3.30543	0.00094832	0.00722583	lncRNA:CR45954
CG4836	103.422	5.02244	1.5196	3.3051	0.000949427	0.00723017	CG4836
CG33056	473.784	0.692771	0.209646	3.30448	0.000951523	0.00724202	CG33056
CG11584	260.895	-7.42592	2.25067	-3.29943	0.000968801	0.00735476	CG11584
mnd	313.431	-1.2091	0.366421	-3.29975	0.000967724	0.00735476	mnd
CG3594	66.4683	-1.19916	0.36344	-3.29947	0.00096866	0.00735476	CG3594
asRNA:CR45149	227.669	1.06292	0.322161	3.29936	0.00096907	0.00735476	asRNA:CR45149
ssp7	23.7359	2.1729	0.658487	3.29983	0.000967425	0.00735476	ssp7
asRNA:CR45268	210.517	1.1702	0.354749	3.29867	0.000971449	0.00736865	asRNA:CR45268
Mnr	2213.55	0.618195	0.18745	3.29791	0.000974075	0.0073844	Mnr
CG9119	330.247	-0.84189	0.255325	-3.29733	0.000976093	0.00739553	CG9119
mmy	1052.98	-0.764961	0.232071	-3.29624	0.000979867	0.00741994	mmy
CG17036	37.6006	-2.7387	0.831211	-3.29483	0.000984814	0.0074532	CG17036
Spn100A	297.891	-6.67946	2.02741	-3.29459	0.00098567	0.00745548	Spn100A
cGlr2	46.7782	1.9905	0.604303	3.29387	0.00098817	0.00747019	cGlr2
CG4596	52.8883	1.30391	0.395894	3.29357	0.000989225	0.00747396	CG4596
Mlp60A	22507.5	1.38672	0.421088	3.29318	0.000990627	0.00748035	Mlp60A
CG14073	1065.06	1.05121	0.31938	3.29139	0.000996923	0.00752367	CG14073
Mst98Ca	19.1927	5.68248	1.72718	3.29003	0.00100175	0.00755586	Mst98Ca
Epac	127.534	-1.09965	0.334333	-3.28909	0.00100512	0.00757701	Epac
CG5945	14.6178	-3.35613	1.02052	-3.28864	0.00100672	0.00758057	CG5945
Nplp2	2611.13	-1.25209	0.380725	-3.28869	0.00100655	0.00758057	Nplp2
Ran	2249.16	-0.500528	0.152242	-3.28772	0.00101003	0.00760126	Ran
Piezo	2228.62	-0.79868	0.24312	-3.28512	0.00101938	0.00766729	Piezo
lncRNA:CR45421	20.2039	-2.57215	0.783379	-3.28341	0.0010256	0.00770666	lncRNA:CR45421
CG2157	537.022	0.924864	0.281682	3.28336	0.00102576	0.00770666	CG2157
eIF4G2	1261.44	0.911065	0.277608	3.28184	0.00103131	0.00774405	eIF4G2
CG31676	520.822	1.00534	0.306362	3.28155	0.00103238	0.00774777	CG31676
CG6362	19.0934	2.34188	0.71395	3.28017	0.00103745	0.00778148	CG6362
gw	3676.23	0.663179	0.202195	3.27991	0.00103842	0.00778439	gw
CG11811	833.819	-0.774922	0.236285	-3.27961	0.00103952	0.00778513	CG11811
CG3760	649.48	-0.733803	0.22375	-3.27956	0.00103968	0.00778513	CG3760
CG7702	134.805	1.15696	0.352815	3.27922	0.00104094	0.00779022	CG7702
Hsc70-2	41.5834	2.58941	0.789905	3.27813	0.00104497	0.00781608	Hsc70-2
Octalpha2R	202.056	0.865463	0.264041	3.27776	0.00104636	0.0078221	Octalpha2R
18w	273.726	-1.13383	0.346005	-3.27691	0.0010495	0.00784117	18w
CG9737	40.7635	-2.32119	0.708612	-3.27569	0.00105406	0.0078709	CG9737
CG6293	285.876	0.980764	0.299705	3.27243	0.00106628	0.00795771	CG6293
CG34163	63.4536	-1.33778	0.408929	-3.27143	0.00107004	0.00797695	CG34163
blw	22217.4	0.6776	0.207122	3.2715	0.0010698	0.00797695	blw
CG2278	134.95	1.34446	0.41107	3.27064	0.00107304	0.00799485	CG2278
CG31777	27.9809	-2.83908	0.869208	-3.26628	0.00108969	0.0081124	CG31777
CG15695	46.8779	-2.16912	0.664113	-3.2662	0.00109002	0.0081124	CG15695
Prosalpha5	589.025	0.740294	0.2267	3.26553	0.00109261	0.00812712	Prosalpha5
Ogdh	8744.55	0.680126	0.208327	3.2647	0.00109578	0.00814626	Ogdh
Nt5c	485.39	0.818119	0.250682	3.26358	0.00110015	0.00817422	Nt5c
CG45085	1352.81	-0.762378	0.233705	-3.26214	0.00110574	0.00821119	CG45085
dbe	89.9325	-0.873392	0.267751	-3.26196	0.00110646	0.00821201	dbe
POSH	165.954	-0.742299	0.227692	-3.26011	0.0011137	0.0082573	POSH
exu	122.345	4.96835	1.52404	3.25999	0.00111416	0.0082573	exu
CG46298	10.3786	5.25329	1.61147	3.25993	0.00111441	0.0082573	CG46298
NUCB1	1217.04	-0.704449	0.216166	-3.25883	0.00111871	0.00828004	NUCB1
CG32192	21.2512	3.10716	0.953421	3.25896	0.0011182	0.00828004	CG32192
Src42A	976.943	-0.785417	0.241134	-3.25718	0.00112526	0.00832392	Src42A
rst	375.25	-0.79983	0.245612	-3.25648	0.00112803	0.00833985	rst
CG15629	241.214	-1.15679	0.35546	-3.25435	0.00113652	0.00839802	CG15629
lncRNA:CR44980	28.1116	1.7245	0.52996	3.25401	0.00113789	0.0084013	lncRNA:CR44980
CG17377	16.8823	5.31516	1.63346	3.25393	0.00113822	0.0084013	CG17377
CG32437	6.04575	6.94913	2.13586	3.25356	0.00113969	0.00840758	CG32437
CG8026	1356.53	-0.760558	0.233791	-3.25315	0.00114133	0.00841506	CG8026
CG14718	13.8156	6.30185	1.93759	3.25242	0.00114426	0.00843205	CG14718
CG34453	37.0948	-1.60441	0.493716	-3.24967	0.00115538	0.00850929	CG34453
Tapdelta	534.336	-0.667379	0.205545	-3.24688	0.00116676	0.00858843	Tapdelta
CG34291	301.905	1.93092	0.594749	3.24661	0.0011679	0.00859208	CG34291
Fim	761.178	-0.76547	0.235867	-3.24534	0.0011731	0.0086256	Fim
PK2-R1	29.3197	-1.65632	0.510495	-3.24453	0.00117646	0.0086456	PK2-R1
CG17600	374.871	-0.749891	0.231262	-3.2426	0.00118445	0.0086967	CG17600
asRNA:CR31144	6356.96	-0.726806	0.224147	-3.24254	0.00118471	0.0086967	asRNA:CR31144
CG33003	12.8805	-4.41515	1.36204	-3.24157	0.00118875	0.00871686	CG33003
RapGAP1	557.509	-0.760492	0.234599	-3.24166	0.00118834	0.00871686	RapGAP1
CG9044	715.374	0.693552	0.214002	3.24087	0.00119164	0.0087333	CG9044
Uhg2	81.4769	-1.41055	0.435284	-3.24053	0.00119309	0.00873913	Uhg2
asRNA:CR31084	298.861	1.93678	0.597707	3.24035	0.00119384	0.00873987	asRNA:CR31084
tHMG2	12.0621	4.69717	1.44977	3.23994	0.00119553	0.0087475	tHMG2
lncRNA:CR45606	26.0026	2.06092	0.636335	3.23873	0.00120065	0.00878016	lncRNA:CR45606
mir-4945	12.9794	2.6672	0.823644	3.23829	0.00120247	0.0087887	mir-4945
ringer	982.699	-1.04692	0.32339	-3.23733	0.00120655	0.00880417	ringer
Uhg5	217.462	-0.919731	0.284088	-3.23749	0.00120585	0.00880417	Uhg5
Mst84Dc	5.62366	6.84296	2.11375	3.23736	0.00120641	0.00880417	Mst84Dc
RpLP0	15370.7	-0.68766	0.212448	-3.23684	0.00120863	0.00880498	RpLP0
CG11594	272.833	0.781163	0.241334	3.23685	0.00120858	0.00880498	CG11594
SecCl	90.1078	1.63027	0.503639	3.23699	0.00120799	0.00880498	SecCl
betaTub85D	38.967	5.0187	1.55121	3.23536	0.00121491	0.00884592	betaTub85D
vari	1035.24	-0.490724	0.151709	-3.23464	0.00121796	0.00886332	vari
rod	82.9641	1.43826	0.444687	3.23431	0.00121937	0.00886878	rod
lncRNA:CR44993	21.5954	2.00917	0.621618	3.23216	0.00122858	0.00893097	lncRNA:CR44993
Rab11	2055.23	-0.550541	0.17037	-3.23145	0.00123163	0.00894829	Rab11
Rb97D	426.354	0.652161	0.201876	3.23051	0.00123571	0.00897308	Rb97D
CG32036	5.59967	-5.17183	1.60125	-3.22987	0.00123849	0.00897869	CG32036
Blimp-1	547.286	-3.07438	0.951829	-3.22997	0.00123802	0.00897869	Blimp-1
NADK	462.867	-0.589835	0.182608	-3.23006	0.00123766	0.00897869	NADK
Tmhs	396.321	-1.13447	0.351366	-3.22875	0.00124331	0.0090088	Tmhs
scra	97.5817	1.5293	0.4737	3.22841	0.00124481	0.0090148	scra
Hr4	432.897	-4.4126	1.36691	-3.22815	0.00124592	0.009018	Hr4
CG6142	110.786	-1.19596	0.370529	-3.22771	0.00124785	0.0090271	CG6142
Alp8	224.676	1.75686	0.544401	3.22714	0.00125032	0.00904014	Alp8
olf186-M	312.718	-1.23866	0.383848	-3.22697	0.00125109	0.00904081	olf186-M
asRNA:CR45714	106.451	0.841167	0.260896	3.22415	0.00126348	0.00912544	asRNA:CR45714
CG3285	112.942	1.90594	0.591385	3.22283	0.00126929	0.00916247	CG3285
Gadd45	570.288	-0.992377	0.307966	-3.22236	0.0012714	0.00917278	Gadd45
sNPF-R	180.369	1.03531	0.321525	3.22	0.00128188	0.00924346	sNPF-R
CG15186	172.291	0.979646	0.304325	3.21908	0.00128605	0.0092685	CG15186
AdamTS-A	742.517	-0.967895	0.300927	-3.21638	0.0012982	0.00934605	AdamTS-A
tut	11.0848	2.82978	0.879796	3.2164	0.00129809	0.00934605	tut
CG42673	751.545	0.750248	0.233279	3.21609	0.00129949	0.00935035	CG42673
AttC	46.8929	2.84223	0.883819	3.21586	0.00130056	0.00935305	AttC
CRAT	660.195	0.702062	0.218359	3.21517	0.00130366	0.00937034	CRAT
fws	204.042	0.607761	0.189122	3.2136	0.00131082	0.00941677	fws
Etf-QO	828.342	0.597479	0.185972	3.21274	0.00131475	0.00943993	Etf-QO
Fmo-2	347.282	-0.827526	0.257617	-3.21223	0.00131707	0.00945152	Fmo-2
CG32447	60.3781	-2.75381	0.857404	-3.2118	0.00131906	0.00946074	CG32447
Rtca	104.157	0.942642	0.293514	3.21157	0.0013201	0.00946315	Rtca
CG43153	117.766	2.09989	0.653882	3.21142	0.0013208	0.00946318	CG43153
CG8701	26.2149	5.34286	1.66386	3.21113	0.00132216	0.00946782	CG8701
l(1)G0320	2176.99	-1.13471	0.353519	-3.20975	0.00132851	0.00950825	l(1)G0320
CG13203	29.8671	-1.54018	0.479933	-3.20917	0.0013312	0.00952241	CG13203
grn	156.154	-1.10407	0.34426	-3.20709	0.00134086	0.00958137	grn
Strump	539.419	0.84847	0.26455	3.20722	0.00134026	0.00958137	Strump
p47	303.377	0.582433	0.181642	3.20649	0.00134363	0.00959604	p47
lqf	1916.28	0.685782	0.213915	3.20586	0.00134661	0.00960714	lqf
CG5646	95.923	1.19765	0.37357	3.20596	0.00134615	0.00960714	CG5646
CG32240	3.97658	6.25524	1.95179	3.20488	0.00135121	0.0096348	CG32240
Exn	861.773	-0.90974	0.284108	-3.2021	0.00136431	0.00972307	Exn
mthl2	33.8918	-2.23436	0.697817	-3.20192	0.00136514	0.00972382	mthl2
asRNA:CR42860	1103.29	1.03244	0.322836	3.19803	0.0013837	0.00985078	asRNA:CR42860
CG3527	40.0576	-1.38906	0.434413	-3.19756	0.00138595	0.0098567	CG3527
Cyp4d1	78.9282	2.39314	0.74843	3.19755	0.00138599	0.0098567	Cyp4d1
lncRNA:CR46003	38.8144	2.96583	0.927628	3.19721	0.00138762	0.00986301	lncRNA:CR46003
CG7560	56.5919	-2.32342	0.726957	-3.19609	0.00139305	0.00989638	CG7560
CG7512	33.0523	-1.44371	0.451755	-3.19578	0.00139451	0.00990155	CG7512
mAcon1	14551.2	0.692573	0.216818	3.19426	0.00140188	0.00994525	mAcon1
knon	14.0754	6.18403	1.93601	3.19421	0.00140215	0.00994525	knon
ste24a	273.887	-0.699358	0.218959	-3.19401	0.00140313	0.00994697	ste24a
Cubn	366.72	-1.61574	0.506307	-3.19123	0.00141667	0.0100377	Cubn
Ebp	4.69249	-5.8483	1.83332	-3.19	0.00142273	0.01007	Ebp
Tsp66E	1021.39	-0.996201	0.312278	-3.19011	0.00142217	0.01007	Tsp66E
ssp5	13.4991	7.06014	2.21403	3.18882	0.00142854	0.0101058	ssp5
su(sable)	608.148	0.800774	0.251198	3.18782	0.00143348	0.0101354	su(sable)
Zpr1	101.931	-1.1276	0.354159	-3.1839	0.00145308	0.0102632	Zpr1
Fs	95.5854	1.17988	0.370569	3.18397	0.00145272	0.0102632	Fs
Rat1	253.781	-0.769522	0.241872	-3.18152	0.00146503	0.0103421	Rat1
CG15892	28.4435	1.77312	0.557372	3.18122	0.00146658	0.0103477	CG15892
Nepl20	90.1796	-2.03606	0.640131	-3.18069	0.00146926	0.0103611	Nepl20
aop	654.848	-1.27884	0.402111	-3.18032	0.00147113	0.0103634	aop
CG32344	201.289	-0.994299	0.312636	-3.18037	0.00147087	0.0103634	CG32344
CG15128	11.6387	5.24484	1.64944	3.17976	0.00147397	0.010378	CG15128
Rpp25	141.571	-1.11827	0.351711	-3.17951	0.00147523	0.0103805	Rpp25
CG9776	863.823	0.737991	0.232118	3.17939	0.00147587	0.0103805	CG9776
wbl	89.8614	-2.16219	0.680128	-3.1791	0.00147735	0.0103855	wbl
lncRNA:CR33938	36.9324	4.4683	1.40608	3.17785	0.00148373	0.0104249	lncRNA:CR33938
Ccp84Ad	115.457	-1.30309	0.410322	-3.17579	0.0014943	0.0104937	Ccp84Ad
CG31826	37.7258	-2.26107	0.712221	-3.17468	0.00150004	0.010523	CG31826
CG33293	68.2755	1.97578	0.622336	3.17479	0.00149946	0.010523	CG33293
Cpr65Av	323.165	-1.55377	0.48963	-3.17335	0.00150693	0.0105658	Cpr65Av
Wnt2	50.4261	-1.52527	0.480712	-3.17293	0.0015091	0.0105755	Wnt2
tadr	122.099	1.36501	0.430361	3.17178	0.00151507	0.0106104	tadr
arg	34.2772	1.38004	0.435115	3.17167	0.00151566	0.0106104	arg
CG34454	550.814	-1.3004	0.410058	-3.17125	0.00151782	0.01062	CG34454
Phae1	30.1533	2.83559	0.894245	3.17093	0.00151951	0.0106263	Phae1
CG12470	13.0982	6.15826	1.94248	3.17031	0.00152278	0.0106436	CG12470
igl	334.97	-1.42217	0.448817	-3.16871	0.00153117	0.0106967	igl
Snx1	491.831	0.600396	0.189515	3.16807	0.00153454	0.0107147	Snx1
CG31021	11.1784	2.53131	0.799059	3.16786	0.00153565	0.0107169	CG31021
Mlc-c	1630.55	-0.632005	0.199523	-3.16758	0.00153716	0.0107218	Mlc-c
CG10280	11.7656	-4.60856	1.45505	-3.16729	0.00153869	0.0107269	CG10280
coro	6429.81	0.678462	0.21423	3.16698	0.00154033	0.0107328	coro
eIF6	174.643	-1.01624	0.321144	-3.16443	0.00155387	0.0108216	eIF6
CG13239	13.0548	-5.08348	1.60777	-3.16182	0.00156784	0.0109132	CG13239
Prosap	1646.69	0.830008	0.262585	3.16091	0.00157277	0.0109315	Prosap
Ube4B	851.139	0.909484	0.287723	3.16097	0.00157243	0.0109315	Ube4B
CG32198	812.595	8.35099	2.64198	3.16088	0.00157292	0.0109315	CG32198
CG6330	425.988	-0.857881	0.271454	-3.16032	0.00157597	0.0109471	CG6330
ASPP	393.336	-0.831768	0.263263	-3.15945	0.00158065	0.0109739	ASPP
FipoQ	728.617	0.835591	0.264591	3.15804	0.00158832	0.0110215	FipoQ
maf-S	302.86	-1.24411	0.394128	-3.1566	0.00159619	0.0110647	maf-S
Scp2	50.9656	1.61766	0.512452	3.1567	0.00159563	0.0110647	Scp2
asRNA:CR44984	68.586	-1.4675	0.464925	-3.15641	0.00159722	0.0110661	asRNA:CR44984
CG7430	3203.64	0.647732	0.205287	3.15526	0.00160356	0.0111043	CG7430
pk	203.182	-1.17166	0.371394	-3.15477	0.00160622	0.011117	pk
CG34375	52.7196	-2.01655	0.639327	-3.15417	0.00160954	0.0111285	CG34375
Spn42Db	19.9676	2.02574	0.642226	3.15425	0.00160911	0.0111285	Spn42Db
CG33483	9.39497	-3.27779	1.03926	-3.15398	0.00161062	0.0111303	CG33483
CAH3	553.964	-0.64754	0.205335	-3.15357	0.00161286	0.01114	CAH3
CG12017	102.76	-2.92018	0.926265	-3.15264	0.00161799	0.0111602	CG12017
CG9596	112.592	-1.0715	0.33985	-3.15285	0.00161687	0.0111602	CG9596
Zasp52	16875.9	0.801775	0.254323	3.15259	0.00161828	0.0111602	Zasp52
CG11563	83.9646	-1.3339	0.423141	-3.15238	0.00161948	0.0111628	CG11563
alpha-Est8	323.264	0.883317	0.280268	3.15169	0.00162329	0.0111833	alpha-Est8
TwdlR	70.5058	-10.0149	3.17868	-3.15064	0.00162912	0.0112177	TwdlR
sgl	381.643	-1.28865	0.409118	-3.14982	0.00163369	0.0112262	sgl
Bmcp	220.333	-0.740988	0.235235	-3.14999	0.00163278	0.0112262	Bmcp
Atg9	484.461	0.676278	0.214678	3.1502	0.00163159	0.0112262	Atg9
alpha-Est4	58.8925	2.40249	0.762703	3.14997	0.00163286	0.0112262	alpha-Est4
CG1233	321.478	0.54277	0.172336	3.14949	0.00163553	0.0112331	CG1233
CG45095	6.38827	-5.35154	1.69989	-3.14817	0.00164295	0.0112678	CG45095
CG7173	30.6753	-2.97546	0.945185	-3.14802	0.00164382	0.0112678	CG7173
CG15715	416.298	-0.797594	0.253346	-3.14823	0.0016426	0.0112678	CG15715
lncRNA:CR44307	16.3159	2.08522	0.662398	3.148	0.00164394	0.0112678	lncRNA:CR44307
CG15011	199.753	0.723641	0.229887	3.14781	0.00164498	0.0112692	CG15011
MAPk-Ak2	812.564	-0.483364	0.153655	-3.14577	0.00165653	0.0113425	MAPk-Ak2
obst-E	2745.73	-1.06035	0.337091	-3.1456	0.00165745	0.0113431	obst-E
CG7991	46.5016	-1.83156	0.582372	-3.14501	0.00166082	0.0113603	CG7991
asRNA:CR46067	394.774	0.469897	0.14942	3.14481	0.00166196	0.0113623	asRNA:CR46067
CG3294	85.4003	-1.36109	0.432848	-3.14449	0.00166376	0.0113689	CG3294
Rpn13R	22.1114	2.5656	0.815977	3.14421	0.00166536	0.0113741	Rpn13R
CG10463	70.2447	-0.992459	0.315784	-3.14284	0.00167315	0.0114214	CG10463
Myo10A	1134.88	-1.49487	0.476057	-3.14012	0.00168881	0.0115164	Myo10A
CG8079	169.372	0.753631	0.240023	3.13983	0.00169049	0.0115164	CG8079
snoRNA:Psi28S-3385b	12.1615	2.30881	0.735263	3.14012	0.0016888	0.0115164	snoRNA:Psi28S-3385b
Arp53D	10.3249	5.20194	1.6567	3.13994	0.00168984	0.0115164	Arp53D
C901	24.6309	-2.92665	0.932165	-3.13963	0.00169161	0.0115182	C901
Nuak	3061.81	1.02879	0.327734	3.13909	0.00169476	0.0115338	Nuak
CCT6	1089.6	-0.659352	0.21008	-3.13858	0.0016977	0.0115479	CCT6
CG6503	12.8698	2.6348	0.839552	3.13834	0.00169908	0.0115515	CG6503
asRNA:CR45466	59.0993	1.08805	0.346746	3.13787	0.00170178	0.011564	asRNA:CR45466
CecC	5.11921	4.85439	1.54737	3.13719	0.00170573	0.011585	CecC
CG2267	12.5952	6.00117	1.91327	3.1366	0.0017092	0.0116027	CG2267
Dsor1	147.065	0.844975	0.269405	3.13644	0.0017101	0.011603	Dsor1
KrT95D	725.595	1.02933	0.328328	3.13506	0.00171817	0.0116518	KrT95D
yellow-h	327.962	-0.802266	0.255914	-3.1349	0.00171913	0.0116525	yellow-h
CG6661	12.3155	2.68249	0.856458	3.13208	0.00173573	0.011759	CG6661
Pgant9	798.629	-0.939537	0.300025	-3.13153	0.00173899	0.0117752	Pgant9
NimB1	62.5929	1.27289	0.406531	3.13109	0.00174158	0.0117868	NimB1
CG18095	31.8901	1.93817	0.619062	3.13081	0.00174323	0.011792	CG18095
CG8046	21.9894	-2.1175	0.67668	-3.12926	0.0017525	0.0118488	CG8046
Drip	311.265	-0.945059	0.302063	-3.12868	0.00175591	0.0118606	Drip
CG42393	35.7656	2.85075	0.911172	3.12867	0.00175601	0.0118606	CG42393
CG13560	118.494	11.2562	3.59797	3.12848	0.00175711	0.011862	CG13560
Fib	217.298	-1.27674	0.408268	-3.12722	0.00176468	0.0119072	Fib
CG7006	44.7888	-1.46485	0.468603	-3.126	0.00177201	0.0119453	CG7006
atms	459.376	0.655016	0.209539	3.12598	0.00177211	0.0119453	atms
CG12853	5.85006	4.24954	1.35981	3.12509	0.00177752	0.0119758	CG12853
ben	1979.55	0.650035	0.208158	3.1228	0.00179138	0.0120631	ben
GstZ2	744.637	-1.18131	0.378323	-3.12249	0.00179327	0.0120698	GstZ2
Sox100B	51.8389	1.30378	0.417613	3.12199	0.00179631	0.0120767	Sox100B
Root	122.008	1.63639	0.52412	3.12216	0.00179531	0.0120767	Root
[truncated: 882 more rows]

## Sheet: AA high
Smox		ACtinMYo
Cnot4		Acam
asRNA:CR46067		Act57B
4E-T		Act87E
stac		Arp53D
TppII		Arp8
Tak1		Mhc
CG1233		Act42A
CG8671		Act5C
Ptp61F		Act79B
CG9795		Act88F
CG9705		Arp1
Trc8		Arp10
p47		Arp2
CG5003		Arp3
Pgm2a		Arp5
CG15118		Arp6
Mef2		Arpc1
GluRIIA		Arpc2
Etf-QO		Arpc3A
Pak		Arpc3B
Snx1		Arpc4
Npc1a		Arpc5
sbr		Bap55
fws		Cam
Opa1		ck
CG33111		dachs
ReepA		didum
Ptpmeg2		jar
CG5445		Mhcl
Mnr		Mlc-c
cass		Mlc1
Npl4		Mlc2
sut1		Myo10A
Acn		Myo28B1
RhoGAP68F		Myo31DF
Acer		Myo61F
prd1		Myo81F
MED24		Myo95E
ben		ninaC
CG7430		sqh
Rpn13		zip
Cbl
Tango9
asRNA:CR44119
Rb97D
GC1
ADD1
CG8852
atms
RhoBTB
CG8547
waw
CG10602
TfIIFalpha
bbx
gw
Fit2
RanBPM
Moca-cyp
Atg9
Ugt37D1
CG7611
coro
GluRIIC
blw
grk
Ogdh
Spg7
Rcd1
CG31638
lqf
CG3626
HDAC4
CG33056
mAcon1
MICU3
CG9044
CG15814
flr
cdm
Asph
CRAT
Cerk
Cyp12a5
sing
CG2218
Actn
CG4239
Neurochondrin
Idgf3
Atg4b
Zir
Usp30
kdn
CG15011
Ankle2
Atg10
Prosalpha5
CYLD
CG9485
sav
CR30409
CG9776
CG6276
CG6454
Dgk
CG42673
Pka-R1
CG8079
CG6791
CG5805
Tab2
BuGZ
lola
Gbeta13F
Vps29
Rbp9
CG13895
capu
corn
Pop2
Asx
Usp2
CG1677
Hayan
CG11594
CG1673
CG33181
CG7296
CG14322
GEFmeso
CG2200
Nak
shop
Poxm
Start1
B52
Lmpt
Or43b
Bem46
Dgp-1
CG2641
l(1)G0196
CG11537
Pih1D1
Adar
CG9588
Hnf4
Tomosyn
scaf6
Zasp52
su(sable)
CG6621
Octbeta2R
smg
Nt5c
g
CG46491
Nmnat
hppy
Nelf-E
Prp39
ap
CG6340
snk
Pli
Pi4KIIalpha
Nhe3
FipoQ
CG3632
Pkc98E
Prosap
anne
Drep4
CG3558
asRNA:CR45714
Arp8
VhaPPA1-1
Sfxn2
CG3603
PIG-Z
CG45069
Strump
Dsor1
CG4452
Ada2a
Sox102F
Reph
Nipsnap
whd
PDZ-GEF
CG44098
SF1
Hez
CG6709
CG3270
CG8475
CG18324
CG1965
Gyg
INE-1{}2439
Octalpha2R
CG8389
Frq2
cnn
Cwc25
CG2321
CG12877
Dredd
Sulf1
Pdcd4
Ciz1
Pdp
alpha-Est8
CG11247
kar
pre-mod(mdg4)-V
pre-mod(mdg4)-U
pre-mod(mdg4)-X
Act57B
pre-mod(mdg4)-W
IKKbeta
CG10710
CG43739
Gapdh2
FER
CG15747
CG17724
Mhc
CG12237
CG7766
Ube4B
Jheh3
Atg18a
eIF4G2
sky
capt
Pkn
tay
regucalcin
Pax
DEF8
CG32767
Nin
Adhr
Adh
CG2157
Pgk
CG1640
Pcf11
Ucp4A
CG9297
Pka-C3
Rtca
Naus
fz3
pre-mod(mdg4)-AE
pre-mod(mdg4)-Y
pre-mod(mdg4)-AD
Sesn
Lpin
ebd1
CG3764
CG5910
CG3198
Cat
seq
CG43897
CG7220
grsm
CaMKI
SmD3
CG46429
Got1
mod(mdg4)
Sh
snoRNA:660
Dh44-R2
CG4558
CG1812
Tsp42Ep
hdc
Rpi
CG8272
Slc45-1
Pgm1
CG15186
CG31999
CG15706
CG5664
Pgi
TrpRS-m
CG6293
PhKgamma
Mgat2
Lrch
CG5541
CG4213
CG9147
CG13937
CG31550
CG34112
Nmdmc
CG31676
Ada2b
Prm
ewg
CG10483
RIC-3
asRNA:CR44987
Cyp4p3
pre-mod(mdg4)-Z
pre-mod(mdg4)-T
PIG-N
Gapdh1
wtrw
CG8679
CG10132
dbr
Cyp6a13
cbs
Rgk3
CG2701
asRNA:CR42860
Swt1
Ptx1
Nuak
Aldh7A1
KrT95D
EDTP
CG6726
Kcmf1
CG45076
CG42390
CG17110
sNPF-R
tow
CR43212
betaggt-I
CG32756
CG42272
ClC-a
Ate1
Kah
CG14073
SmydA-3
galectin
CG32772
Dab
Doa
CG12320
asRNA:CR44968
transib3{}1538
EbpIII
CG18135
asRNA:CR45149
cher
asRNA:CR45270
asRNA:CR45612
copia{}RR48341
Cf2
Ip6k
CG6106
Zasp66
axed
CG30151
CG7457
CG4393
SmydA-7
Socs16D
mei-218
CG8929
asRNA:CR45466
rdgB
subdued
Galk
CG33655
Eno
Pglym78
INE-1{}4170
INE-1{}3973
CG30389
mthl14
CG1578
Ppt2
CG13012
unc-13
asRNA:CR44321
magu
Lgr1
Nhe2
CG3631
AstA-R2
Cyp4e3
Mpcp1
CG42494
Pka-R2
CG4887
Cyp6v1
Pfk
Proc-R
pan
Tsen15
GlyP
CG5254
CG4896
retm
Tsp42Eh
Gpdh3
Had1
CG4562
Saf-B
CG45071
Mcad
tn
pre-mod(mdg4)-J
pre-mod(mdg4)-K
pre-mod(mdg4)-P
pre-mod(mdg4)-L
pre-mod(mdg4)-I
Plp
asRNA:CR45485
CG7702
Srpk79D
pre-mod(mdg4)-C
pre-mod(mdg4)-AB
pre-mod(mdg4)-E
CG30403
mir-281-1
PyK
dnc
CG42700
CG3679
asRNA:CR45268
Asator
CG1271
CG30269
CG30273
unk
mei-217
MsR2
CG3168
lncRNA:CR44042
inaE
Fs
NimB2
l(2)k09913
asp
Caper
Dhit
CG5646
INE-1{}3480
pbl
Gdh
CG17754
CG43325
CG43326
Nlg1
Cdc6
sqa
SmydA-4
CG12868
asRNA:CR45167
Act87E
CG34138
CG14401
pre-mod(mdg4)-B
pre-mod(mdg4)-H
pre-mod(mdg4)-G
CkIIalpha-i3
Mlp84B
nAChRbeta2
qkr58E-1
dib
Tpi
FBtr0304286_df_nrg
CG42724
Ipp
Daao1
tna
Pdk
CG44249
CG5177
sbm
nod
CG44303
mthl8
Nep3
CG18171
DIP1
CG32813
CAH1
CG6700
CG9896
asRNA:CR45271
sls
asRNA:CR44894
rdgA
Men-b
CG42697
NimB1
FBtr0304376_df_nrg
Paip2
mir-281-2
CG14893
bmm
ZC3H3
FBtr0445454_df_nrg
slou
CG6163
FBtr0304377_df_nrg
Ipk1
Bbd
CG5674
Mvl
asRNA:CR44690
cer
CG4596
mt:lrRNA
Sox100B
Naa80
rudhira
Lcp4
CG14655
sals
SoYb
Ald1
Cyp4d2
Klp67A
CG9150
CanA1
asRNA:CR44029
lncRNA:CR31781
asRNA:CR44054
Mdh1
CG15247
CG5181
Cyp6d5
GLS
lncRNA:CR43650
alpha-Est3
CG7402
CG2278
Cyp6a14
Eip63F-1
mv
CG5087
INE-1{}3164
CG5335
tadr
CG3961
Tsf1
CG13896
Mst84B
Pepck2
Mlp60A
CG33229
CG1139
CR10102
GIIIspla2
arg
CG10660
UK114
brwl
DOR
CG11777
CG7084
HeT-A{}6278
Cyp4aa1
CG4294
lncRNA:CR45177
Shab
INE-1{}3239
Adat1
Unc-115b
CG30357
CG15547
asRNA:CR46128
pyd
rod
SerT
CG6923
Xe7
fend
P5cr-2
1360{}1504
CG4911
sisRNA:CR46358
gypsy10{}3098
CG8888
Pcp
rngo
Pitslre
flea{}876
Arc1
CG8850
MED6
CG31313
hfp
CG14990
SmydA-9
w
CG46306
Iml1
CG13004
asRNA:CR46139
copia{}837
gypsy12{}2629
en
Spc105R
pav
CG10948
asRNA:CR46473
Mthfs
CG5070
CG3788
sncRNA:359
sala
CG43355
Spn88Eb
Irk3
scra
Elk
INE-1{}2086
CARPB
CG17803
CG16762
CG17224
CG10650
CG3085
CG13314
CG4301
G5{}1484
lncRNA:roX2
CG14963
CG31211
thoc6
CG17230
INE-1{}4168
CG44245
CG8369
mud
su(w[a])
asRNA:CR43864
CG10077
asRNA:CR43981
CG13204
NaPi-T
asRNA:CR44981
Cpr97Ea
CG31102
CG7860
p24-2
norpA
CG31904
CG10407
INE-1{}3227
INE-1{}3383
pdgy
CG10513
PNUTS
accord2{}1996
org-1
CG10512
copia{}49
dsx
Scp2
Pde6
CG17739
Srxn
CG4962
SecCl
Rbp1-like
CG43402
Argl
CG8478
plx
KCNQ
diver2{}1632
otk
CG43322
CG5955
copia{}1684
Root
salt
cal1
NFAT
Srr
yellow-e
APC7
Rt1b{}161
lncRNA:CR43196
Cyp6d2
CG13510
CG42565
CG13511
Rh50
hoe1
alpha-Est1
Hao
Max{}RR48810
Max{}6605
hopper{}205
INE-1{}4371
CG33521
copia{}387
CG13177
lncRNA:CR45517
Ythdc1
gypsy{}615
CG11044
copia{}988
X{}1937
CG34284
DNaseII
pre-mod(mdg4)-N
pre-mod(mdg4)-O
pre-mod(mdg4)-AA
CG6041
CG6845
CG14022
Cyp6t3
lncRNA:CR44980
Lerp
sti
Ypel
Ugt49B1
CG42259
CG31712
janB
CR45033
copia{}631
drl
CG14957
5.8SrRNA-Psi:CR45854
alpha-Est2
CG16743
INE-1{}5321
Dscam4
2SrRNA-Psi:CR40677
mdg3{}1683
copia{}466
Alp8
CG13982
Tsp29Fb
lncRNA:CR43126
CG15892
Nepl6
AMPdeam
asRNA:Eig63F-2
Zip71B
Sr-CIV
CG13311
mthl3
fry
Tsp42Ed
CG31068
CG34426
Mst36Fa
CG34043
CG31373
flea{}423
CG18598
Atg16
Doc3{}Kif3C[1555]
flea{}470
CG13962
CG17258
copia{}920
Idgf5
CG7255
CG15406
Quasimodo{}3987
run
CG14292
flea{}877
CG15412
CG6415
CG10764
IM33
CG16727
St3
CG32486
pre-lola-G
CG16713
CG34136
CG32801
lncRNA:CR42862
lncRNA:CR42651
stg
CG17108
diver2{}2295
transib4{}1579
CG9444
Cyp9b2
Lkr
INE-1{}4196
CG3984
Gbp3
CG42656
CG42586
CG31775
snoRNA:Psi28S-3571
l(2)efl
CG4335
CG4757
Nepl9
CG3285
Ugt301D1
INE-1{}4865
Cr1a{}2297
CG34291
Cr1a{}1995
RR51475
copia{}539
CG2017
CG10799
rdgC
CG10623
asRNA:CR31084
CG18095
CG33281
tous
lncRNA:CR44353
copia{}298
copia{}302
Doc2{}4272
hh
CG8642
TTLL6B
polo
CG33293
lncRNA:CR45361
HB{}248
cGlr2
AOX2
Argk1
HB{}227
lncRNA:CR44993
CG15556
PGRP-SA
Smyd3
Cyp4g15
copia{}293
Spn42Db
Agxt
copia{}RR48399
FBtr0309650_df_nrg
Oatp58Dc
lncRNA:CR45606
asRNA:CR46133
copia{}840
Mur18B
Vago
Abca3
CG12003
asRNA:CR45195
lncRNA:CR44307
Mal-B2
Gr28b
CG14183
LpR1
Ect3
CG43153
flea{}152
Sodh-2
nsr
CG15293
CG34431
flea{}102
CG8665
INE-1{}3388
sip2
hiw
Ir51b
ssp7
DZIP1
Hf
rgr
mat
CG15408
MtnA
CG43085
RhoGAP102A
CG16926
INE-1{}4071
1360{}747
brv3
gypsy8{}2317
springer{}300
2SrRNA-Psi:CR45858
INE-1{}4069
Acsx1R
copia{}1016
asRNA:CR45479
CG32444
Lfg
hoe2
17.6{}1063
INE-1{}3385
GstD2
CG8028
mir-4954
Sobp
CG10621
FBtr0309649_df_nrg
kumpel
asRNA:CR46129
CG10514
lncRNA:CR43836
CG17752
CG14245
CG31104
Cyp4d14
CG42324
lncRNA:CR46073
snoRNA:Psi28S-3385b
Pdfr
CG6362
1360{}3655
snoRNA:Psi28S-3385a
CG42751
CG18666
INE-1{}5932
Cyp6g2
CG14695
CG4839
CG43133
CG14195
wam
v
CG10962
Cyp4d1
AkhR
AttB
copia{}67
alpha-Est4
fon
CG1544
CG15155
invader1{}2036
CG4793
SdhBL
Lcp65Ab1
Lcp65Ab2
Nna1
INE-1{}2903
Pgant4
Rh7
CG34235
CG30058
CG34312
INE-1{}3942
G4{}2264
Ilp6
CG12825
INE-1{}3943
Gcat
INE-1{}5916
NimB3
1360{}2787
Npc2g
CR43310
CG31021
CG8736
GNBP-like3
PIG-X
CG15530
Oatp58Da
SPH93
Rpn13R
CG18473
CG2233
Hsc70-2
CG5966
Ance-4
gypsy{}6157
Fst
CG31300
CG31380
Ir62a
lncRNA:CR44899
copia{}399
FBtr0309591_df_nrg
corolla
Gyc88E
Muc11A
INE-1{}6208
BomT3
CG6503
asRNA:CR46136
lncRNA:CR43461
F{}1516
CG14258
mir-4945
CG1494
Drs
CG6661
INE-1{}3409
INE-1{}6210
lncRNA:CR44779
CG43179
HB{}1552
lncRNA:CR44423
Dnah3
1360{}780
CG9777
5.8SrRNA-Psi:CR45857
CG30016
br
CG9616
Mst27D
teq
CG30090
INE-1{}4388
Ugt35B1
INE-1{}4315
Dso1
CG9314
tut
CG3982
Tc1{}1529
INE-1{}5339
Phae1
Listericin
CG42393
AttC
JYalpha
CG30393
Dnali1
CG13607
CG18563
CG31817
CG46492
CG32846
1360{}1546
CG18480
nerfin-1
CG31183
INE-1{}5915
Prat2
CG42847
2SrRNA:CR45864
sage
Pen
snoRNA:Me28S-U1688
Est-P
CG33225
CG4712
CG43165
INE-1{}3381
HB{}5410
CG17107
CG11835
Cyp6g1
lncRNA:CR46003
HeT-A{}6532
CG33920
copia{}1391
Sardh
E(spl)mgamma-HLH
CG33120
INE-1{}3966
Syp
INE-1{}5870
CG10177
CG11313
CG8100
CR43364
CG30398
INE-1{}4855
CG32192
lncRNA:CR32660
Mst36Fb
Obp99c
CG14053
lncRNA:TS16
CG32249
Alp13
cas
mthl4
CG7366
CG42807
lncRNA:CR32690
INE-1{}5341
CR46406
CG33235
CG17751
CG9920
copia{}1467
CG12708
CR15821
CG34278
Cr1a{}2834
lncRNA:CR43635
ZnT35C
CG5509
CG32436
Cyp12d1-p
1360{}1507
CG46439
Iyd
CG30278
CG4714
CG18568
CG18179
Alp1
Fw3{}5488
lncRNA:CR44149
CG31115
CG17636
CG32650
CG15728
CG9981
CG18605
lncRNA:CR45372
CG1835
lncRNA:CR40465
lncRNA:CR45750
Pex7
Desi
lncRNA:CR45388
CG8952
djl
INE-1{}4857
CG1113
CG43327
CG43328
CG30355
COX4L
Nep6
CG13796
hmw
CG12824
CG5681
AttA
FB{}4833
BomS4
lncRNA:cherub
CG13323
rn
asRNA:CR11538
Cr1a{}5681
Lsp2
CG31013
CG10026
Lip2
CG13733
rpk
CG43291
CG6481
salto
CG31178
lncRNA:CR43626
lncRNA:CR44344
topi
tbrd-1
CG1979
CG11815
F{}5373
CG1324
CG31601
CG13337
CG30082
CG14297
CG33340
CG9010
eIF4E3
CG5194
Mst77F
MFS12
yellow-d2
CG18131
CG8072
CG15631
CG13324
CG12853
yellow-e3
DptB
CG17105
CG4716
CAH13
asRNA:CR44155
Ald2
Bfc
flea{}1415
CG3513
BomBc2
Rh5
Fbp2
Lcp9
S-Lap2
CG3927
Dhc98D
lncRNA:CR33938
BomBc3
Lsp1beta
CG34166
INE-1{}3519
CG12902
CG43397
INE-1{}5163
CG42857
CG34330
insb
CG13991
BomS1
CG5111
CG15145
CG14355
CG31921
tHMG1
MtnB
tHMG2
BomS2
lncRNA:CR32658
Optix
Cyp6a18
bb8
Mst87F
CG13540
CG30091
CR33318
Best3
FBtr0445488_df_nrg
CecC
CG6652
CG12983
Q{}5726
Cpr49Ah
CG14488
CG7309
FBtr0445487_df_nrg
exu
CG11300
CG32071
FB{}2602
CG4836
CG46305
CG43200
CG43172
Obp99b
CG4744
CG9632
AttD
mir-9380
CG9106
CG15741
Erk7
RpL37b
asRNA:CR43908
lncRNA:CR45348
robl62A
CG30376
CG7202
CG32081
Arp53D
CG6209
CG15128
Mst33A
CG13978
CG46298
CG44434
CG44435
CG30099
CG17377
CG43750
Oatp58Db
Ir48a
CG31226
CG9173
loopin-1
Lsp1gamma
Crtp
BomS3
CG42523
Fbp1
CG33286
CAH14
wa-cup
Lcp1
Dso2
CG15262
Rpn12R
Actn3
CG10252
CG10845
CG4988
CG14691
CG12861
CG15711
Mst98Ca
CG33459
CG34227
CG17376
CG33287
ACXC
CG4701
E(spl)m4-BFM
CG7634
l(3)72Dr
E(spl)m8-HLH
CG33704
lncRNA:CR32652
CG6262
CG31639
CG31406
sut4
CG42853
CG13898
CG12147
CG31459
CG32651
CG31909
CG31797
Dic2
lncRNA:CR32835
CG2267
CG17279
CG4021
CG32371
glob2
CG31802
asRNA:CR45024
S-Lap3
lncRNA:CR31386
CG15475
BomBc1
CG3942
lncRNA:CR44455
Tom
CG12470
knon
CG30177
CG2955
CG12684
CecB
CG32240
Cpr78E
CG33308
CG14718
CG17349
CG12617
Recs1
Pglym87
CG31948
CG45765
COX6CL
S-Lap4
CG7164
CG5217
CG43131
CG31482
dj
CG33309
ProtB
Ran-like
Tektin-A
CG46304
CG30039
SkpD
CG34241
CG13243
CG7295
CG11106
CG10950
CG15395
TotA
CG1958
lncRNA:CR44103
ProtA
Mst84Dc
eIF3d2
CG12376
CG13872
Lcp2
CG32437
CG12689
CG13245
CG43816
ssp5
CG9014
CG4000
CG7320
Mst84Dd
CG14926
ms(2)34Fe
lncRNA:CR43278
lncRNA:CR43452
CG6614
CG17770
Acam
CG15219
Klp59C
CG13186
Mst84Da
MstProx
CG32388
CG43439
CG31468
CG18662
S-Lap7
CG34168
CG4691
sowi
Lsp1alpha
CG42460
CG32198
lncRNA:CR44407
CG42500
CG13560

## Sheet: HSD_high_Kegg
Category	Term	Count	%	PValue	Genes	List Total	Pop Hits	Pop Total	Fold Enrichment	Bonferroni	Benjamini	FDR
KEGG_PATHWAY	dme03008:Ribosome biogenesis in eukaryotes	43	2.87241	3.72551e-09	CG11920, CG33158, NON1, CG10214, NOP5, NMD3, AK6, NS2, NS1, CG8064, CG3071, HOIP, NS3, CG2972, L(1)G0020, BKA, CG30349, RIOK2, RIOK1, 5.8SRRNA:CR40454, CG7728, CG3527, FIB, NOP56, NOP60B, L(3)72DN, CG12325, MAT89BA, RAT1, L(2)05287, EIF6, CG9799, RTC1, CG1671, NHP2, WCD, CG4806, CG13097, CG12301, L(2)K09022, RPP25, CG4866, RAN	306	194	3613	2.61706	4.50787e-07	4.50787e-07	4.50787e-07
KEGG_PATHWAY	dme01040:Biosynthesis of unsaturated fatty acids	8	0.534402	0.0045978	DESAT1, CG18609, HACD1, MFE2, SC2, CG8630, CG31522, CG15531	306	26	3613	3.63298	0.427428	0.23056	0.23056
KEGG_PATHWAY	dme00520:Amino sugar and nucleotide sugar metabolism	11	0.734803	0.00571636	GNPNAT, GFAT1, CHT7, MMY, CHT6, HEXO2, CHT5, SGL, HEXO1, CG15771, CHT10	306	48	3613	2.70581	0.500258	0.23056	0.23056
KEGG_PATHWAY	dme04512:ECM-receptor interaction	5	0.334001	0.0101932	TSP, VKG, LANB2, COL4A1, HML	306	11	3613	5.3669	0.71053	0.308344	0.308344
KEGG_PATHWAY	dme04141:Protein processing in endoplasmic reticulum	20	1.33601	0.0171856	WBL, CG33303, SEC61BETA, UBC7, CG8860, TRAM, DROJ2, TAPDELTA, L(1)G0320, HSC70-4, HSP68, PRTP, HSP70BC, HSP70AB, HSP70AA, HSP70BB, HSP83, SEC61GAMMA, HSP70BA, HSP70BBB	306	135	3613	1.74921	0.877241	0.415891	0.415891
KEGG_PATHWAY	dme03020:RNA polymerase	7	0.467602	0.03618	POLR1A, POLR1B, POLR3G, POLR2F, POLR1E, POLR1F, POLR2H	306	30	3613	2.75501	0.988425	0.632266	0.632266
KEGG_PATHWAY	dme02010:ABC transporters	8	0.534402	0.0368657	CG31793, CG31121, CG3164, E23, CG32091, CG11069, MRP4, L(2)03659	306	38	3613	2.48572	0.98938	0.632266	0.632266
KEGG_PATHWAY	dme00600:Sphingolipid metabolism	7	0.467602	0.0418027	WUN, CDASE, CG11438, CG11437, HEXO2, HEXO1, SCHLANK	306	31	3613	2.66614	0.994298	0.632266	0.632266
KEGG_PATHWAY	dme04977:Vitamin digestion and absorption	4	0.267201	0.0590601	CUBN, CUBN2, AMNIONLESS, CG17036	306	11	3613	4.29352	0.999368	0.794031	0.794031
KEGG_PATHWAY	dme01212:Fatty acid metabolism	9	0.601202	0.0807341	DESAT1, ACC, CG18609, HACD1, MFE2, SC2, CG8630, CG31522, CG15531	306	54	3613	1.96786	0.999962	0.814808	0.814808
KEGG_PATHWAY	dme00603:Glycosphingolipid biosynthesis - globo and isoglobo series	3	0.200401	0.0848727	CG5731, HEXO2, HEXO1	306	6	3613	5.90359	0.999978	0.814808	0.814808
KEGG_PATHWAY	dme00250:Alanine, aspartate and glutamate metabolism	6	0.400802	0.0921413	PRAT, R, ADSL, GS1, GFAT1, GS2	306	29	3613	2.44287	0.999992	0.814808	0.814808
KEGG_PATHWAY	dme04981:Folate transport and metabolism	5	0.334001	0.0950101	CG31793, E23, CG7560, MRP4, L(2)03659	306	21	3613	2.81124	0.999994	0.814808	0.814808
KEGG_PATHWAY	dme04213:Longevity regulating pathway - multiple species	9	0.601202	0.0954528	HSC70-4, HSP68, HSP70BC, HSP70AB, SIRT1, HSP70AA, HSP70BB, HSP70BA, HSP70BBB	306	56	3613	1.89758	0.999995	0.814808	0.814808

## Sheet: AA_high_Kegg
Category	Term	Count	%	PValue	Genes	List Total	Pop Hits	Pop Total	Fold Enrichment	Bonferroni	Benjamini	FDR
KEGG_PATHWAY	dme01230:Biosynthesis of amino acids	24	1.88976	2.70639e-10	PYK, GOT1, ALD1, ENO, ALD2, ARGL, RPI, TPI, CG9010, CG1640, SRR, CG17110, KDN, PFK, PGK, CBS, GAPDH1, ARG, P5CR-2, GAPDH2, PGLYM78, PGLYM87, MACON1, CG6726	276	68	3613	4.6202	3.32886e-08	3.32886e-08	3.00409e-08
KEGG_PATHWAY	dme00010:Glycolysis / Gluconeogenesis	21	1.65354	9.60888e-10	PYK, ADH, ALD1, ENO, ALD2, CG7430, TPI, CG9010, PGM2A, PGI, PFK, PGK, GAPDH1, GAPDH2, PGLYM78, PEPCK2, PGLYM87, CG4988, ALDH7A1, PGM1, CG32444	276	55	3613	4.99822	1.18189e-07	5.90946e-08	5.33293e-08
KEGG_PATHWAY	dme01200:Carbon metabolism	30	2.3622	1.1159e-08	ALD1, ENO, ALD2, CG7430, RPI, GDH, TPI, CG9010, CG6415, SDHBL, CG1640, SRR, KDN, PFK, GAPDH1, GAPDH2, PGLYM78, PYK, MDH1, GOT1, PGI, PGK, MEN-B, CAT, HAO, BB8, OGDH, PGLYM87, MACON1, AGXT	276	121	3613	3.2456	1.37255e-06	4.57518e-07	4.12882e-07
KEGG_PATHWAY	dme01100:Metabolic pathways	127	10	4.35204e-07	CERK, HAD1, IPP, CG7430, GDH, GLS, SDHBL, NORPA, LOOPIN-1, KDN, PFK, MCAD, CG31013, CG17224, CG31021, PIG-N, UGT49B1, DGK, GCAT, PIG-X, PGI, CG6106, CG3632, PGK, ARG, P5CR-2, GYC88E, ALDH7A1, CG11594, CG12237, TPI, BLW, ALP8, PGANT4, CG3961, ALP1, CG7402, V, GAPDH1, GAPDH2, GSTD2, SMYD3, CG31115, CG1544, ECT3, CG32444, CG3603, PYK, GOT1, CG10602, S-LAP7, MTHFS, S-LAP4, S-LAP3, S-LAP2, AMPDEAM, CG…	276	1156	3613	1.43815	5.35287e-05	1.33825e-05	1.20769e-05
KEGG_PATHWAY	dme00250:Alanine, aspartate and glutamate metabolism	11	0.866142	3.02583e-05	PRAT2, CG1640, GOT1, ARGL, BB8, CG7860, CG6661, DAAO1, GDH, AGXT, GLS	276	29	3613	4.96539	0.00371491	0.000744355	0.000671735
KEGG_PATHWAY	dme00220:Arginine biosynthesis	9	0.708661	3.66997e-05	CG1640, CG17110, GOT1, ARG, ARGL, BB8, GDH, CG6726, GLS	276	19	3613	6.2008	0.00450397	0.000752344	0.000678944
KEGG_PATHWAY	dme00260:Glycine, serine and threonine metabolism	10	0.787402	0.000103766	CG6415, SRR, CBS, SARDH, CG7430, PGLYM78, PGLYM87, AGXT, ALDH7A1, GCAT	276	27	3613	4.84836	0.0126828	0.00182332	0.00164544
KEGG_PATHWAY	dme00670:One carbon pool by folate	9	0.708661	0.000350424	CG10621, CG6415, NMDMC, CBS, CG8665, SARDH, CG7430, MTHFS, ALDH7A1	276	25	3613	4.71261	0.0421937	0.00538778	0.00486214
KEGG_PATHWAY	dme04070:Phosphatidylinositol signaling system	14	1.10236	0.000510818	CG13898, IPP, DGK, RDGA, EIP63F-1, IPK1, ACAM, NORPA, CG3632, CG17770, L(1)G0196, PI4KIIALPHA, EDTP, IP6K	276	61	3613	3.0044	0.0609126	0.00698118	0.00630009
KEGG_PATHWAY	dme01210:2-Oxocarboxylic acid metabolism	10	0.787402	0.0011318	CG1640, CG17110, KDN, GOT1, OGDH, CG7430, MACON1, AGXT, CG1544, CG6726	276	36	3613	3.63627	0.130025	0.0139212	0.012563
KEGG_PATHWAY	dme04820:Cytoskeleton in muscle cells	12	0.944882	0.00202454	AMPDEAM, ACT87E, ENO, CG31999, MHC, JYALPHA, SLS, MLP84B, ACT57B, CAPU, ZASP52, MLP60A	276	54	3613	2.90902	0.220632	0.0218461	0.0197147
KEGG_PATHWAY	dme00500:Starch and sucrose metabolism	9	0.708661	0.00213132	PGI, GYG, CG5177, MAL-B2, CG6262, CG9485, PGM2A, GLYP, PGM1	276	32	3613	3.68173	0.230822	0.0218461	0.0197147
KEGG_PATHWAY	dme04745:Phototransduction - fly	9	0.708661	0.00390382	ACAM, NORPA, CG17770, CG13898, ACT87E, RDGC, INAE, ACT57B, EIP63F-1	276	35	3613	3.36615	0.381903	0.0369362	0.0333327
KEGG_PATHWAY	dme00330:Arginine and proline metabolism	11	0.866142	0.00573322	CG31021, LOOPIN-1, GOT1, ARGK1, ARG, P5CR-2, CG6661, S-LAP4, ALDH7A1, S-LAP2, CG31013	276	53	3613	2.71691	0.506985	0.0503704	0.0454562
KEGG_PATHWAY	dme00030:Pentose phosphate pathway	7	0.551181	0.00767787	PGI, PFK, ALD1, ALD2, RPI, PGM2A, PGM1	276	24	3613	3.81809	0.612493	0.0629586	0.0568163
KEGG_PATHWAY	dme00630:Glyoxylate and dicarboxylate metabolism	8	0.629921	0.0104804	CG6415, KDN, MDH1, CAT, HAO, CG7430, MACON1, AGXT	276	33	3613	3.17347	0.726345	0.0805679	0.0727076
KEGG_PATHWAY	dme04624:Toll and Imd signaling pathway	14	1.10236	0.0159169	DRS, PGRP-SA, BOMS3, BEN, DSO1, DREDD, TAK1, BOMS2, BOMS1, DPTB, TAB2, IKKBETA, CECC, CECB	276	89	3613	2.05919	0.861033	0.115163	0.103928
KEGG_PATHWAY	dme04142:Lysosome	16	1.25984	0.0444255	NPC1A, MVL, CG30273, TSP42ED, NPC2G, G, CG42565, VHAPPA1-1, LERP, CG7402, DNASEII, CG30269, CG13510, PPT2, CG13511, ECT3	276	123	3613	1.70284	0.996263	0.292122	0.263622
KEGG_PATHWAY	dme00052:Galactose metabolism	7	0.551181	0.0458835	PFK, MAL-B2, CG4988, ECT3, PGM2A, CG32444, PGM1	276	35	3613	2.61812	0.996903	0.292122	0.263622
KEGG_PATHWAY	dme00230:Purine metabolism	13	1.02362	0.0474995	PDE6, CG15547, CG31183, PGM2A, AMPDEAM, PRAT2, ACXC, CG6106, AOX2, DNC, GYC88E, CG30016, PGM1	276	93	3613	1.82987	0.997486	0.292122	0.263622
KEGG_PATHWAY	dme00380:Tryptophan metabolism	5	0.393701	0.0702541	V, CAT, CG7430, CG1544, ALDH7A1	276	21	3613	3.1168	0.999872	0.411489	0.371343
KEGG_PATHWAY	dme00620:Pyruvate metabolism	8	0.629921	0.0749633	PYK, MDH1, ADH, MEN-B, CG7430, PEPCK2, ALDH7A1, CG14022	276	49	3613	2.13724	0.999931	0.419113	0.378224
