# Supplementary material for: Vitamin C Supplementation Mitigates Diabetes-Associated Skeletal Muscle Atrophy
Source: Research Square preprint supplement (doi:10.21203/rs.3.rs-8342512/v1), 2026-02-12
Supplement: Supplementary file 2 [file 971fbf179242ec9f0b1b83de.xlsx]

## Sheet: results_HSD_vs_CT_sig
	baseMean	log2FoldChange	lfcSE	stat	pvalue	padj	gene_id
TwdlM	2756.83	9.72978	0.414161	23.4927	4.83885e-122	5.57871e-118	TwdlM
TwdlY	980.57	7.71254	0.396469	19.4531	2.74544e-84	1.58261e-80	TwdlY
TwdlB	2389.25	9.96904	0.574051	17.3661	1.48972e-67	5.725e-64	TwdlB
Lcp9	2200.68	-5.98714	0.369448	-16.2056	4.6019e-59	1.32638e-55	Lcp9
TwdlL	770.597	6.70541	0.422711	15.8629	1.14558e-56	2.35256e-53	TwdlL
CG34227	1899.74	-6.80491	0.429097	-15.8587	1.22433e-56	2.35256e-53	CG34227
Lcp65Ab1	4013.27	-5.13873	0.326758	-15.7264	9.97219e-56	1.64242e-52	Lcp65Ab1
Lcp65Ab2	4013.57	-5.14008	0.327205	-15.7091	1.31129e-55	1.88973e-52	Lcp65Ab2
CG12480	2713.39	6.33552	0.44156	14.348	1.0958e-46	1.40372e-43	CG12480
CG10026	142.505	-4.92801	0.352663	-13.9737	2.25541e-44	2.60026e-41	CG10026
TwdlK	1287.82	11.369	0.832532	13.6559	1.86179e-42	1.95132e-39	TwdlK
CG11835	1755	-3.24473	0.283234	-11.456	2.1938e-30	2.1077e-27	CG11835
betaNACtes1	168.682	6.04305	0.544776	11.0927	1.36077e-28	1.20679e-25	betaNACtes1
l(3)mbn	3996.85	-2.56101	0.232359	-11.0218	3.00042e-28	2.47085e-25	l(3)mbn
Cpr49Ah	81.1851	-5.74876	0.521959	-11.0138	3.27773e-28	2.51926e-25	Cpr49Ah
CG4115	867.592	2.30365	0.211007	10.9174	9.51703e-28	6.85762e-25	CG4115
Alp8	224.676	-5.70845	0.527614	-10.8194	2.78702e-27	1.89009e-24	Alp8
CG17290	181.61	6.46431	0.611402	10.5729	3.97879e-26	2.54841e-23	CG17290
CG32249	12272.8	-4.80039	0.455625	-10.5358	5.90622e-26	3.58383e-23	CG32249
CG12164	199.562	6.39123	0.610316	10.472	1.16156e-25	6.69581e-23	CG12164
yellow-d2	534.027	-5.66361	0.547535	-10.3438	4.46332e-25	2.45036e-22	yellow-d2
Lcp4	57218.9	-3.71628	0.359534	-10.3364	4.82465e-25	2.52833e-22	Lcp4
sncRNA:419	409.023	2.40743	0.234609	10.2615	1.05115e-24	5.26902e-22	sncRNA:419
CG31626	873.549	7.28169	0.72013	10.1116	4.90595e-24	2.3567e-21	CG31626
Cat	1856.65	-2.17868	0.222317	-9.79988	1.12719e-22	5.19817e-20	Cat
AOX2	289.081	-3.46257	0.355733	-9.73363	2.16709e-22	9.60937e-20	AOX2
yellow-e	479.971	-2.77625	0.285723	-9.7166	2.56188e-22	1.07213e-19	yellow-e
CG9192	257.592	6.1827	0.636411	9.71495	2.60383e-22	1.07213e-19	CG9192
Syp	4527.6	-3.03862	0.316929	-9.58767	9.00946e-22	3.58173e-19	Syp
CG34330	393.905	-3.55572	0.371352	-9.57509	1.0177e-21	3.91104e-19	CG34330
yellow-h	327.962	2.55452	0.267298	9.55681	1.21436e-21	4.51626e-19	yellow-h
asRNA:CR45171	275.021	5.48713	0.579598	9.46713	2.8763e-21	1.03628e-18	asRNA:CR45171
Lcp2	5657.13	-8.44688	0.902061	-9.36398	7.67908e-21	2.68279e-18	Lcp2
Pcp	412.289	-3.37346	0.363113	-9.29037	1.53757e-20	5.21373e-18	Pcp
CG30458	215.516	8.36081	0.904933	9.23915	2.48463e-20	8.18436e-18	CG30458
CG14326	236.248	9.40318	1.02398	9.18299	4.19271e-20	1.3249e-17	CG14326
Cpr67Fb	267.118	6.40287	0.697368	9.18148	4.25201e-20	1.3249e-17	Cpr67Fb
CAH1	2959.01	-1.84859	0.204298	-9.04849	1.4496e-19	4.39801e-17	CAH1
Lcp65Ag2	4596.24	3.71385	0.417518	8.89507	5.83832e-19	1.7259e-16	Lcp65Ag2
CG43386	459.063	4.85195	0.54681	8.87319	7.10785e-19	2.04866e-16	CG43386
CG8563	505.275	2.48475	0.281394	8.83017	1.0452e-18	2.93905e-16	CG8563
CG14324	187.402	9.0013	1.02605	8.77279	1.74294e-18	4.78436e-16	CG14324
CAH2	2843.76	1.72521	0.199954	8.62803	6.24152e-18	1.67345e-15	CAH2
CG5326	827.123	2.63152	0.305262	8.62054	6.66368e-18	1.74604e-15	CG5326
Had1	619.976	-2.1656	0.252407	-8.57981	9.50264e-18	2.43458e-15	Had1
asRNA:CR45485	619.998	-2.16841	0.253029	-8.56981	1.03655e-17	2.59791e-15	asRNA:CR45485
Obp56a	1703.74	3.13098	0.371141	8.43608	3.28161e-17	8.04972e-15	Obp56a
Phk-3	3640.76	1.89259	0.227055	8.33539	7.7244e-17	1.83009e-14	Phk-3
CG14752	135.713	7.10772	0.8528	8.33457	7.77815e-17	1.83009e-14	CG14752
Adat1	2518.57	-1.84995	0.222086	-8.3299	8.09091e-17	1.8656e-14	Adat1
Lsp1alpha	1524.78	-7.30017	0.885072	-8.2481	1.6093e-16	3.63797e-14	Lsp1alpha
CG11581	180.589	7.69816	0.938784	8.20014	2.40112e-16	5.32356e-14	CG11581
CG15023	304.008	5.41347	0.66743	8.11092	5.02382e-16	1.09282e-13	CG15023
Cpr78Cb	152.791	5.70791	0.704893	8.09756	5.60709e-16	1.19711e-13	Cpr78Cb
CG14258	867.401	-3.91985	0.485215	-8.0786	6.55149e-16	1.37331e-13	CG14258
TwdlJ	1558.96	11.563	1.44015	8.02906	9.82229e-16	2.02216e-13	TwdlJ
Ccp84Ae	251.929	10.8594	1.37075	7.92221	2.33333e-15	4.71946e-13	Ccp84Ae
asRNA:CR45713	809.37	7.22815	0.919822	7.85821	3.8967e-15	7.74569e-13	asRNA:CR45713
CG7724	195.502	3.35471	0.427166	7.85341	4.04872e-15	7.91148e-13	CG7724
CG15249	103.545	3.86255	0.492521	7.8424	4.42026e-15	8.49353e-13	CG15249
CG5715	45.9382	5.60666	0.71523	7.83896	4.54308e-15	8.58642e-13	CG5715
CG4757	251.981	-3.77579	0.482542	-7.82478	5.08528e-15	9.45616e-13	CG4757
Ccp84Ag	631.308	3.11145	0.400977	7.75967	8.51538e-15	1.55831e-12	Ccp84Ag
mt:ND5	8725.09	1.59887	0.20679	7.73183	1.06009e-14	1.90965e-12	mt:ND5
CG43131	59.7437	-7.09097	0.917444	-7.72905	1.08351e-14	1.92182e-12	CG43131
CG15731	454.361	8.50875	1.10389	7.70798	1.27823e-14	2.23283e-12	CG15731
CG32266	1061.36	4.79411	0.626498	7.65224	1.97513e-14	3.3987e-12	CG32266
BomS2	75.6804	-3.41149	0.446445	-7.64145	2.14788e-14	3.64161e-12	BomS2
CG14568	128.645	6.51759	0.853626	7.63519	2.25494e-14	3.7677e-12	CG14568
CG2150	121.908	7.19454	0.946198	7.60363	2.87937e-14	4.74233e-12	CG2150
CG14422	5567.69	10.2347	1.35475	7.55466	4.19953e-14	6.81922e-12	CG14422
regucalcin	1144.16	-2.43794	0.325039	-7.50046	6.35935e-14	1.01829e-11	regucalcin
CG7255	369.47	-1.69314	0.232345	-7.2872	3.16465e-13	4.99799e-11	CG7255
BomS3	101.506	-4.09858	0.562955	-7.28047	3.3265e-13	5.1826e-11	BomS3
loh	328.739	1.81928	0.25027	7.26929	3.6137e-13	5.55498e-11	loh
CG31313	1599.16	-1.78882	0.246289	-7.26307	3.78409e-13	5.74036e-11	CG31313
CG32694	2320.28	2.05961	0.285414	7.21622	5.34521e-13	8.00324e-11	CG32694
CG9717	576.314	2.10371	0.291867	7.20776	5.688e-13	8.4073e-11	CG9717
CG3679	433.003	-2.04016	0.283964	-7.18457	6.74183e-13	9.83881e-11	CG3679
Cpr65Aw	89.1948	-2.74153	0.382195	-7.1731	7.3316e-13	1.05657e-10	Cpr65Aw
CG17267	170.056	6.02467	0.841999	7.1552	8.35504e-13	1.1892e-10	CG17267
speck	598.356	2.24072	0.316737	7.0744	1.50096e-12	2.09408e-10	speck
Lcp1	9244.93	-6.81857	0.96392	-7.07379	1.50758e-12	2.09408e-10	Lcp1
CG11345	746.558	2.33272	0.331678	7.03308	2.02029e-12	2.76934e-10	CG11345
CG10598	300.305	3.55644	0.50578	7.0316	2.04175e-12	2.76934e-10	CG10598
CG13226	106.643	6.24631	0.896683	6.96602	3.26025e-12	4.37063e-10	CG13226
CG8888	5773.26	-1.1511	0.165816	-6.94206	3.8643e-12	5.12086e-10	CG8888
CG7406	416.616	9.80201	1.41777	6.91366	4.72292e-12	6.18756e-10	CG7406
Alp1	405.862	-5.1805	0.750843	-6.89958	5.21558e-12	6.75622e-10	Alp1
snsl	163.811	2.40075	0.348175	6.89523	5.37786e-12	6.88904e-10	snsl
Cyp4e3	1793	2.83579	0.41146	6.89201	5.50101e-12	6.96935e-10	Cyp4e3
TwdlG	234.658	3.75682	0.545652	6.88503	5.77771e-12	7.24034e-10	TwdlG
Osi6	854.545	8.75386	1.28184	6.82913	8.54287e-12	1.05904e-09	Osi6
CG32214	97.4068	8.59874	1.26368	6.80452	1.01388e-11	1.24351e-09	CG32214
CG12769	221.695	4.14756	0.620918	6.67973	2.39384e-11	2.90512e-09	CG12769
CG13227	72.37	5.5393	0.833007	6.64976	2.93563e-11	3.52551e-09	CG13227
Lcp65Ag3	12128	2.20893	0.337239	6.55006	5.75158e-11	6.83608e-09	Lcp65Ag3
Ccp84Ad	115.457	2.80096	0.429807	6.51678	7.18307e-11	8.45037e-09	Ccp84Ad
CG1136	313.103	2.00643	0.308997	6.49335	8.39468e-11	9.77598e-09	CG1136
CG4847	2573.18	-1.78711	0.276901	-6.45399	1.08946e-10	1.25604e-08	CG4847
CG11413	118.973	3.84202	0.597302	6.43229	1.25698e-10	1.43483e-08	CG11413
Vajk4	347.479	8.44125	1.3146	6.42117	1.35227e-10	1.52846e-08	Vajk4
CG18473	1070.58	-1.61226	0.253316	-6.36464	1.95755e-10	2.17005e-08	CG18473
br	2948.78	-3.41039	0.535806	-6.36497	1.95333e-10	2.17005e-08	br
TwdlT	278.363	4.58687	0.721079	6.36111	2.00297e-10	2.18232e-08	TwdlT
Osi9	358.989	7.3548	1.15626	6.36084	2.00647e-10	2.18232e-08	Osi9
alphaTub85E	1173.5	1.63268	0.259496	6.29171	3.13986e-10	3.38313e-08	alphaTub85E
PPO1	1106.83	-2.80969	0.447213	-6.28268	3.32791e-10	3.55254e-08	PPO1
teq	275.438	-3.22164	0.513365	-6.27553	3.48443e-10	3.68551e-08	teq
Pde6	622.261	-1.43868	0.23033	-6.24618	4.20606e-10	4.36862e-08	Pde6
CG14569	523.39	7.45579	1.1936	6.24647	4.19832e-10	4.36862e-08	CG14569
CG14095	27.7922	6.22368	0.999745	6.22527	4.80736e-10	4.94857e-08	CG14095
CG32793	1579.83	8.12933	1.30908	6.20998	5.29926e-10	5.40665e-08	CG32793
CG11905	310.361	4.45723	0.719737	6.19286	5.90825e-10	5.97511e-08	CG11905
CG42259	200.993	-1.57042	0.255701	-6.14164	8.16737e-10	8.18796e-08	CG42259
Ccp84Ab	135.855	2.08698	0.340277	6.13317	8.61435e-10	8.56163e-08	Ccp84Ab
CG14147	259.868	10.8923	1.78307	6.10873	1.00427e-09	9.89595e-08	CG14147
Vajk1	1034.98	7.04769	1.15649	6.09404	1.10096e-09	1.07568e-07	Vajk1
Cpr78Cc	1212.66	2.76394	0.455362	6.06977	1.28094e-09	1.241e-07	Cpr78Cc
TwdlW	417.159	8.20107	1.3517	6.06723	1.30134e-09	1.25026e-07	TwdlW
asRNA:CR45481	485.949	1.9795	0.32643	6.06409	1.32703e-09	1.25404e-07	asRNA:CR45481
Pen	239.629	-2.83722	0.467825	-6.06471	1.32188e-09	1.25404e-07	Pen
CG4000	46.259	-7.03027	1.16075	-6.05666	1.38973e-09	1.30262e-07	CG4000
CG10232	112.345	2.20045	0.363935	6.04627	1.48237e-09	1.37824e-07	CG10232
dsx-c73A	117.137	5.68983	0.941559	6.04299	1.51286e-09	1.39534e-07	dsx-c73A
CG30334	112.208	3.38962	0.56185	6.03296	1.60982e-09	1.46631e-07	CG30334
CG6414	484.551	1.97947	0.328139	6.03242	1.61525e-09	1.46631e-07	CG6414
CG13041	29.0427	6.32245	1.05249	6.0071	1.88868e-09	1.70114e-07	CG13041
asRNA:CR45663	28.5547	6.29729	1.05183	5.98696	2.13804e-09	1.91081e-07	asRNA:CR45663
TwdlN	2474.33	7.42593	1.24191	5.97943	2.23923e-09	1.9707e-07	TwdlN
CG4716	217.102	-3.51228	0.587348	-5.9799	2.23277e-09	1.9707e-07	CG4716
CG13047	282.841	3.47725	0.582703	5.96744	2.41011e-09	2.10501e-07	CG13047
CG13699	85.412	4.78096	0.802506	5.95754	2.56059e-09	2.21962e-07	CG13699
CG32213	32.7027	8.87751	1.49185	5.95066	2.67062e-09	2.29773e-07	CG32213
PGRP-SA	126.201	-1.85366	0.311819	-5.94468	2.76999e-09	2.36557e-07	PGRP-SA
CG9701	1205.93	-1.77322	0.299409	-5.92243	3.17228e-09	2.68921e-07	CG9701
CG31371	77.0211	4.71242	0.800248	5.8887	3.89257e-09	3.27572e-07	CG31371
CG33120	69.5417	-3.24404	0.551977	-5.87713	4.17438e-09	3.48743e-07	CG33120
CG11200	137.622	2.28414	0.389553	5.8635	4.53224e-09	3.75915e-07	CG11200
asRNA:CR31084	298.861	-3.48498	0.595751	-5.84972	4.92403e-09	3.99783e-07	asRNA:CR31084
CG42502	4098.43	-2.2426	0.383347	-5.85005	4.9143e-09	3.99783e-07	CG42502
CG10570	4098.43	-2.2426	0.383347	-5.85005	4.9143e-09	3.99783e-07	CG10570
CG7860	88.7527	-2.61099	0.446514	-5.84749	4.99035e-09	4.02334e-07	CG7860
Cpr78E	791.193	-7.75538	1.32686	-5.84489	5.06897e-09	4.05834e-07	Cpr78E
CG34291	301.905	-3.46246	0.592831	-5.84055	5.20274e-09	4.13671e-07	CG34291
CG14564	551.83	8.24469	1.41295	5.83508	5.3764e-09	4.24552e-07	CG14564
CG14111	68.2099	7.53	1.29152	5.83036	5.53087e-09	4.33779e-07	CG14111
Ccp84Aa	51.6406	3.17497	0.544959	5.82607	5.67491e-09	4.42068e-07	Ccp84Aa
CG10205	184.411	3.8809	0.667966	5.81002	6.24666e-09	4.83341e-07	CG10205
CG18641	100.423	2.17715	0.375278	5.80145	6.57456e-09	5.0532e-07	CG18641
CG42819	103.121	4.21322	0.726975	5.79555	6.80969e-09	5.19926e-07	CG42819
CG42656	83.3575	-2.79681	0.482908	-5.7916	6.97202e-09	5.28819e-07	CG42656
asRNA:CR44067	126.83	-1.81153	0.313894	-5.77116	7.87295e-09	5.9325e-07	asRNA:CR44067
CG42500	1109.57	-7.6731	1.32986	-5.76986	7.93351e-09	5.93932e-07	CG42500
CG11350	10734.3	-2.00445	0.347621	-5.76619	8.10845e-09	6.03112e-07	CG11350
CG7465	5176.04	3.2954	0.571745	5.76376	8.22622e-09	6.07949e-07	CG7465
ich	116.447	5.90978	1.02886	5.74402	9.24544e-09	6.78922e-07	ich
Est-P	152.285	-3.75472	0.654662	-5.73536	9.73082e-09	7.10042e-07	Est-P
CG13618	172.21	3.14056	0.547711	5.73397	9.81058e-09	7.1136e-07	CG13618
CG8303	419.993	1.47919	0.258333	5.7259	1.0289e-08	7.41384e-07	CG8303
CG14107	179.041	8.1646	1.42978	5.71039	1.12716e-08	8.07143e-07	CG14107
Pxn	1736.37	-1.84637	0.324798	-5.68467	1.31063e-08	9.32731e-07	Pxn
Cyp4p2	122.528	2.418	0.425662	5.68056	1.34257e-08	9.49598e-07	Cyp4p2
Osi7	703.943	6.75465	1.19261	5.66374	1.48106e-08	1.03486e-06	Osi7
CG34120	1389.65	-0.830977	0.146715	-5.6639	1.4797e-08	1.03486e-06	CG34120
Sgsf	189.731	22.0715	3.90798	5.6478	1.62517e-08	1.12871e-06	Sgsf
Lcp3	72661.8	-2.52029	0.446562	-5.64376	1.66377e-08	1.1486e-06	Lcp3
TwdlS	71.7433	8.22428	1.46536	5.61244	1.99488e-08	1.36898e-06	TwdlS
CG13067	3332.23	2.26724	0.405735	5.588	2.297e-08	1.56699e-06	CG13067
Npc2g	57.5316	-2.86647	0.513751	-5.57949	2.41226e-08	1.63594e-06	Npc2g
CG5191	444.868	1.17915	0.211832	5.56645	2.59979e-08	1.75281e-06	CG5191
mt:srRNA	812.426	1.60245	0.288064	5.56281	2.65471e-08	1.77943e-06	mt:srRNA
lncRNA:CR45664	25.9523	5.36042	0.966847	5.54422	2.95262e-08	1.96767e-06	lncRNA:CR45664
CG14418	478.334	8.26313	1.49223	5.53743	3.06949e-08	2.0338e-06	CG14418
CG7632	228.79	1.3155	0.237724	5.53371	3.1352e-08	2.06547e-06	CG7632
CG9698	60.9468	4.86143	0.87911	5.52994	3.2034e-08	2.09841e-06	CG9698
CG9521	573.663	1.82379	0.329905	5.52822	3.23492e-08	2.10709e-06	CG9521
QC	130.165	1.6794	0.304207	5.5206	3.37852e-08	2.18826e-06	QC
CG34458	26.0565	7.5827	1.37664	5.50814	3.62652e-08	2.33577e-06	CG34458
CG3961	1262.7	-1.32777	0.241513	-5.49772	3.84726e-08	2.46417e-06	CG3961
CG1441	450.856	2.14273	0.389861	5.49612	3.88228e-08	2.47286e-06	CG1441
Cyp6a20	305.599	1.6211	0.296686	5.46403	4.65453e-08	2.93235e-06	Cyp6a20
grk	321.043	-0.987899	0.180795	-5.46418	4.65048e-08	2.93235e-06	grk
stg	144.51	-1.95401	0.357762	-5.46175	4.71451e-08	2.954e-06	stg
Cpr97Ea	186.244	-1.54923	0.283778	-5.45932	4.77959e-08	2.97859e-06	Cpr97Ea
Edg78E	34.3227	3.17192	0.582129	5.44883	5.0701e-08	3.12584e-06	Edg78E
CG4998	836.647	5.59729	1.02715	5.44933	5.05591e-08	3.12584e-06	CG4998
CG17105	104.837	-5.20908	0.957813	-5.43852	5.37263e-08	3.29474e-06	CG17105
CG15554	97.7609	2.4118	0.443898	5.43323	5.53445e-08	3.37602e-06	CG15554
AttA	85.7206	-2.8475	0.52616	-5.41185	6.23762e-08	3.78492e-06	AttA
CG10602	1133.81	-0.834602	0.154708	-5.3947	6.86369e-08	4.14301e-06	CG10602
CG6472	37.0528	2.99306	0.555589	5.38719	7.15676e-08	4.29741e-06	CG6472
CG17026	123.787	-1.66245	0.308822	-5.3832	7.31722e-08	4.371e-06	CG17026
SmydA-9	606.385	-1.78717	0.333106	-5.36517	8.08752e-08	4.80624e-06	SmydA-9
Osi15	655.922	8.56788	1.59899	5.35831	8.40033e-08	4.96653e-06	Osi15
CG14245	158.248	2.54205	0.475389	5.34729	8.92798e-08	5.25157e-06	CG14245
Snmp2	336.826	1.35357	0.253484	5.33986	9.30189e-08	5.44373e-06	Snmp2
asRNA:CR46065	89.5918	2.38242	0.449014	5.3059	1.12118e-07	6.52832e-06	asRNA:CR46065
CG18609	440.831	2.24184	0.423911	5.28847	1.23343e-07	7.14586e-06	CG18609
CG43667	43.6059	5.45133	1.03363	5.27398	1.335e-07	7.69559e-06	CG43667
PPO2	1050.83	-2.69431	0.512007	-5.26226	1.42298e-07	8.16196e-06	PPO2
corn	625.199	-1.19861	0.228007	-5.25689	1.46512e-07	8.33737e-06	corn
CG43333	140.236	4.2616	0.810727	5.25653	1.46803e-07	8.33737e-06	CG43333
CG31221	772.296	1.99544	0.380419	5.24538	1.55964e-07	8.81425e-06	CG31221
CG10175	307.142	1.6903	0.32231	5.24432	1.56858e-07	8.82156e-06	CG10175
CG14570	49.9318	3.61171	0.690117	5.23348	1.66352e-07	9.31007e-06	CG14570
Cpr51A	819.89	2.92248	0.558796	5.22996	1.6955e-07	9.43182e-06	Cpr51A
CG15740	110.772	5.43084	1.03854	5.22929	1.70164e-07	9.43182e-06	CG15740
CG1139	87.1329	-2.45395	0.469605	-5.22557	1.73619e-07	9.5773e-06	CG1139
CG31019	218.273	1.73294	0.331802	5.2228	1.76236e-07	9.67535e-06	CG31019
Cpr47Ec	7958.76	-1.71714	0.330775	-5.19127	2.08868e-07	1.14125e-05	Cpr47Ec
lncRNA:CR45893	473.353	5.63113	1.08525	5.18877	2.1169e-07	1.15121e-05	lncRNA:CR45893
CG15497	29.3233	3.94038	0.75957	5.18765	2.12964e-07	1.15271e-05	CG15497
Cpr65Ec	110.281	3.17141	0.611977	5.18223	2.19248e-07	1.17679e-05	Cpr65Ec
CG12964	269.558	3.14175	0.606275	5.18205	2.19456e-07	1.17679e-05	CG12964
CG4622	271.211	1.4339	0.277421	5.16868	2.35754e-07	1.25834e-05	CG4622
CG9265	1928.63	1.39444	0.269937	5.1658	2.39416e-07	1.27199e-05	CG9265
CG6763	138.261	3.4339	0.667113	5.1474	2.64123e-07	1.39388e-05	CG6763
CG11585	38.9161	3.46896	0.673986	5.14694	2.64776e-07	1.39388e-05	CG11585
CG40198	4965.39	1.77676	0.345479	5.14289	2.70546e-07	1.41778e-05	CG40198
Cbs	493.292	0.949236	0.185053	5.12955	2.90441e-07	1.51516e-05	Cbs
CG11777	422.154	1.17553	0.23022	5.10613	3.28825e-07	1.70767e-05	CG11777
MtnA	171.528	-1.85704	0.363809	-5.10443	3.31799e-07	1.71539e-05	MtnA
Scp2	50.9656	-2.5755	0.504895	-5.10107	3.37741e-07	1.73831e-05	Scp2
CG34201	260.142	10.9052	2.13929	5.09757	3.44038e-07	1.75505e-05	CG34201
CG14615	348.358	1.55293	0.3046	5.09828	3.42754e-07	1.75505e-05	CG14615
alpha-Est2	293.678	-1.81174	0.355496	-5.09637	3.46232e-07	1.75846e-05	alpha-Est2
CG14329	57.697	5.91291	1.16079	5.09387	3.50827e-07	1.77398e-05	CG14329
lncRNA:CR44407	25.6774	-7.06709	1.38826	-5.09059	3.56942e-07	1.79702e-05	lncRNA:CR44407
CG14327	30.6342	7.77783	1.53703	5.06029	4.18629e-07	2.09843e-05	CG14327
sals	3019.53	-1.03699	0.205446	-5.04749	4.47655e-07	2.2255e-05	sals
Cpr65Au	79.0213	-2.89841	0.574237	-5.04741	4.47841e-07	2.2255e-05	Cpr65Au
CG8839	753.945	-0.705744	0.139935	-5.04338	4.57373e-07	2.25924e-05	CG8839
wun2	56.9904	-1.84824	0.366504	-5.04289	4.58551e-07	2.25924e-05	wun2
CG13157	44.9091	6.19513	1.22972	5.03785	4.70801e-07	2.30973e-05	CG13157
CG11550	41.1232	-2.57451	0.511789	-5.03042	4.8941e-07	2.38853e-05	CG11550
CG10467	255.416	-1.78959	0.355798	-5.02979	4.91006e-07	2.38853e-05	CG10467
CG43666	530.355	8.93666	1.77856	5.02465	5.04357e-07	2.44317e-05	CG43666
CG34355	317.114	2.67384	0.533589	5.01104	5.41361e-07	2.61144e-05	CG34355
CG43677	29.4237	8.71343	1.73929	5.00976	5.4498e-07	2.61795e-05	CG43677
CG1468	224.894	-2.32836	0.465226	-5.00481	5.59181e-07	2.67502e-05	CG1468
CG2233	1456	-2.3995	0.479559	-5.00355	5.62829e-07	2.68135e-05	CG2233
Lsp1beta	17480.4	-5.29193	1.05875	-4.99828	5.78438e-07	2.74436e-05	Lsp1beta
CG34038	121.844	2.22153	0.445601	4.98546	6.1814e-07	2.92071e-05	CG34038
Acer	598.9	-0.915525	0.183678	-4.98441	6.21506e-07	2.92463e-05	Acer
dsx	48.589	-2.10719	0.423137	-4.97992	6.36114e-07	2.9812e-05	dsx
Spn47C	607.263	1.28717	0.258742	4.97473	6.53373e-07	3.04969e-05	Spn47C
CG14572	255.542	2.46773	0.496941	4.96584	6.8403e-07	3.17991e-05	CG14572
CG14893	73.3429	-2.03313	0.40977	-4.96164	6.98988e-07	3.2364e-05	CG14893
ssp7	23.7359	-3.19525	0.645288	-4.95167	7.358e-07	3.39321e-05	ssp7
jus	441.64	1.5776	0.319536	4.93716	7.92693e-07	3.6346e-05	jus
GC1	640.366	-0.822874	0.166684	-4.93673	7.94448e-07	3.6346e-05	GC1
CG33459	19.0979	-5.82987	1.18253	-4.93002	8.22223e-07	3.7468e-05	CG33459
asRNA:CR44321	1593.35	-1.30749	0.265477	-4.92505	8.43376e-07	3.81536e-05	asRNA:CR44321
CG6055	124.695	1.77147	0.359695	4.92493	8.43885e-07	3.81536e-05	CG6055
CG30203	57.8756	2.0811	0.423438	4.91477	8.88865e-07	4.00302e-05	CG30203
CG11658	260.883	1.49792	0.305364	4.90537	9.32533e-07	4.16712e-05	CG11658
CG15021	369.304	1.87988	0.383201	4.90572	9.30835e-07	4.16712e-05	CG15021
gol	345.533	1.41753	0.289272	4.90034	9.56708e-07	4.25864e-05	gol
CG13048	48.7397	6.76717	1.38197	4.89675	9.74353e-07	4.32051e-05	CG13048
CG12519	29.269	6.98197	1.42609	4.8959	9.78588e-07	4.32266e-05	CG12519
lncRNA:CR43334	1100.8	1.52198	0.311207	4.89056	1.00548e-06	4.4245e-05	lncRNA:CR43334
Lcp65Af	2971.56	4.1736	0.854664	4.88332	1.04316e-06	4.57285e-05	Lcp65Af
Edg91	232.792	1.36205	0.279035	4.88129	1.05396e-06	4.58533e-05	Edg91
CG7059	60.7744	3.53094	0.723354	4.88135	1.05361e-06	4.58533e-05	CG7059
CG1124	649.03	1.81156	0.371311	4.87881	1.0673e-06	4.62588e-05	CG1124
lectin-24Db	37.1137	-2.47152	0.506818	-4.87655	1.07959e-06	4.66165e-05	lectin-24Db
lncRNA:CR43452	15.5607	-7.36419	1.51361	-4.8653	1.14285e-06	4.91639e-05	lncRNA:CR43452
CG17107	136.747	-2.16396	0.445411	-4.85835	1.18368e-06	5.07312e-05	CG17107
Uhg5	217.462	1.39422	0.28741	4.85098	1.22855e-06	5.24591e-05	Uhg5
Obp99d	97.1983	3.12369	0.645721	4.83753	1.31464e-06	5.59282e-05	Obp99d
CRAT	660.195	-1.05374	0.217884	-4.83626	1.32302e-06	5.60775e-05	CRAT
CG33110	473.192	1.57389	0.325733	4.83184	1.3528e-06	5.71298e-05	CG33110
Cyp6d2	61.0962	-2.11913	0.438645	-4.83108	1.35795e-06	5.7138e-05	Cyp6d2
CG14397	16.4929	5.11377	1.05902	4.82878	1.37369e-06	5.759e-05	CG14397
asRNA:CR45886	41.737	7.33721	1.52121	4.82326	1.4123e-06	5.89944e-05	asRNA:CR45886
CG4982	117.966	3.43677	0.713268	4.81834	1.44754e-06	6.0248e-05	CG4982
CG31262	231.515	1.96768	0.410341	4.79523	1.62492e-06	6.73873e-05	CG31262
Gs2	4820.09	-1.08475	0.226371	-4.7919	1.65207e-06	6.82676e-05	Gs2
CG5973	1203.48	0.696018	0.14528	4.79089	1.66045e-06	6.83692e-05	CG5973
CG13679	101.511	8.03058	1.68076	4.77793	1.77107e-06	7.24136e-05	CG13679
betaTub60D	1388.86	0.834936	0.174749	4.77791	1.77124e-06	7.24136e-05	betaTub60D
Osi19	271.03	10.3135	2.16008	4.7746	1.80062e-06	7.33546e-05	Osi19
CG10264	28.2681	4.03015	0.845002	4.7694	1.84779e-06	7.50112e-05	CG10264
CG9083	56.7142	4.15743	0.873385	4.76013	1.93467e-06	7.82625e-05	CG9083
28SrRNA-Psi:CR41609	13715.1	-2.26853	0.479184	-4.73416	2.19967e-06	8.86714e-05	28SrRNA-Psi:CR41609
CG32237	52.1238	3.58637	0.759314	4.72317	2.32201e-06	9.32767e-05	CG32237
CG9747	542.768	2.22541	0.472089	4.71396	2.42952e-06	9.72566e-05	CG9747
CG13311	463.767	1.61553	0.342841	4.71219	2.45072e-06	9.77659e-05	CG13311
28SrRNA-Psi:CR45860	7649.16	-2.20238	0.46807	-4.70524	2.53564e-06	0.000100805	28SrRNA-Psi:CR45860
ppk	229.589	1.79947	0.382671	4.7024	2.57119e-06	0.000101867	ppk
Hr38	431.194	-2.13822	0.455145	-4.69788	2.62882e-06	0.000103793	Hr38
l(3)72Dr	34.9384	-4.64432	0.989029	-4.69584	2.65514e-06	0.000104336	l(3)72Dr
CG12576	1941.06	1.21225	0.258178	4.69541	2.66066e-06	0.000104336	CG12576
CG1368	1573.15	1.54691	0.329709	4.69175	2.70877e-06	0.000105862	CG1368
Cpr47Ed	48.5881	6.01324	1.2831	4.68649	2.77934e-06	0.000108254	Cpr47Ed
Itgbn	507.574	1.87814	0.401413	4.67882	2.88528e-06	0.000112001	Itgbn
pip	656.704	2.71112	0.580529	4.67009	3.01072e-06	0.000116478	pip
Nna1	953.235	-3.00639	0.644016	-4.66818	3.03873e-06	0.000117169	Nna1
fon	774.712	-2.84328	0.609775	-4.66283	3.11889e-06	0.000119859	fon
CG13640	314.121	2.34107	0.503647	4.64824	3.34777e-06	0.000128228	CG13640
whd	2304.92	0.932079	0.200561	4.64737	3.36194e-06	0.000128344	whd
28SrRNA-Psi:CR45853	1152.83	-2.42286	0.521783	-4.64342	3.42689e-06	0.000130392	28SrRNA-Psi:CR45853
CR33294	32.907	1.93244	0.41633	4.64161	3.45712e-06	0.000131109	CR33294
Cpr31A	33.5989	4.40197	0.949725	4.635	3.56937e-06	0.000134922	Cpr31A
CG13230	4024.03	-1.33446	0.287958	-4.6342	3.58315e-06	0.000135	CG13230
asp	68.7607	-1.9219	0.414958	-4.63156	3.62927e-06	0.000136293	asp
CG13627	44.3789	6.04563	1.30701	4.62555	3.73598e-06	0.000139392	CG13627
CG46316	44.3789	6.04563	1.30701	4.62555	3.73598e-06	0.000139392	CG46316
Cpr49Ad	26.8178	3.15935	0.684119	4.61812	3.87228e-06	0.000143548	Cpr49Ad
Hexo2	228.359	-1.35668	0.293754	-4.61842	3.86666e-06	0.000143548	Hexo2
CG10962	456.096	-2.26096	0.490717	-4.60746	4.07616e-06	0.000150622	CG10962
Gs1	5625.42	1.07148	0.232792	4.60275	4.16953e-06	0.00015358	Gs1
CG14191	25.6023	6.63037	1.44221	4.59736	4.27882e-06	0.000157104	CG14191
polo	121.539	-2.3411	0.509502	-4.59488	4.32996e-06	0.000158476	polo
pcs	997.488	1.13476	0.247086	4.59257	4.37821e-06	0.000159736	pcs
CG9705	984.605	-0.898795	0.195943	-4.58701	4.49633e-06	0.000163528	CG9705
Cubn2	119.522	2.41729	0.527358	4.58378	4.56644e-06	0.000165555	Cubn2
CG14565	340.913	7.42594	1.6211	4.58081	4.63182e-06	0.000167076	CG14565
CG7179	133.777	2.36424	0.516146	4.58056	4.63738e-06	0.000167076	CG7179
CG6839	26.1311	-8.11621	1.77214	-4.57989	4.65215e-06	0.000167086	CG6839
CG31268	208.743	8.25787	1.80748	4.56872	4.90713e-06	0.000175697	CG31268
asRNA:CR45807	266.334	0.96923	0.212346	4.56438	5.00974e-06	0.000178815	asRNA:CR45807
Cpr49Ag	1376.69	1.0774	0.236156	4.56223	5.06128e-06	0.000180097	Cpr49Ag
AttB	73.8654	-2.04767	0.448957	-4.56095	5.09235e-06	0.000180645	AttB
CG42246	70.5274	2.21695	0.486184	4.5599	5.11773e-06	0.000180989	CG42246
Ance-4	95.7603	-2.73285	0.599548	-4.55819	5.1597e-06	0.000181915	Ance-4
CG13607	140.746	-2.70856	0.594757	-4.55407	5.26181e-06	0.00018495	CG13607
asRNA:CR44981	444.198	-1.42991	0.31405	-4.55313	5.28538e-06	0.000185213	asRNA:CR44981
Mec2	50.7871	-2.4139	0.530648	-4.54897	5.39102e-06	0.000188343	Mec2
Acbp2	192.804	-1.4297	0.314557	-4.54512	5.49036e-06	0.000191234	Acbp2
Gcat	162.951	-1.55177	0.341513	-4.54381	5.52463e-06	0.000191848	Gcat
LManII	561.679	-2.08816	0.460043	-4.53904	5.65096e-06	0.000195646	LManII
CG34166	1863.05	-2.79542	0.616116	-4.53717	5.70149e-06	0.000196804	CG34166
CG3823	74.2651	2.0493	0.452011	4.53373	5.79511e-06	0.000199438	CG3823
CG31871	48.8246	3.50758	0.774281	4.53011	5.89521e-06	0.00020228	CG31871
CG7320	34.3911	-5.99375	1.3237	-4.52804	5.95334e-06	0.000203668	CG7320
alpha-Est1	87.7901	-2.04931	0.452778	-4.52607	6.00904e-06	0.000204965	alpha-Est1
Pdfr	100.7	-2.14155	0.473711	-4.52078	6.16116e-06	0.000209534	Pdfr
Tom	18.1093	-6.95826	1.53967	-4.51931	6.20421e-06	0.000209761	Tom
Ugt301D1	71.2283	-2.32548	0.514515	-4.51975	6.19117e-06	0.000209761	Ugt301D1
flr	2147.24	-0.865758	0.191677	-4.51676	6.27925e-06	0.000211677	flr
asRNA:CR44509	53.8271	3.69157	0.818187	4.51188	6.4254e-06	0.000215972	asRNA:CR44509
CG31038	933.601	-0.632688	0.140283	-4.51009	6.47991e-06	0.000217171	CG31038
CG14421	111.216	10.6317	2.35818	4.50845	6.5303e-06	0.000218226	CG14421
ppk26	198.47	1.77246	0.393589	4.50332	6.69016e-06	0.000222921	ppk26
825-Oak	12.2811	7.46484	1.65932	4.49872	6.83622e-06	0.000227132	825-Oak
CG17104	940.691	1.08104	0.240434	4.49619	6.91825e-06	0.000229197	CG17104
asRNA:CR46005	13964.6	1.50574	0.334971	4.49515	6.95224e-06	0.000229663	asRNA:CR46005
CG10936	2954.76	-0.682144	0.151843	-4.49244	7.04129e-06	0.00023194	CG10936
Cadps	560.195	1.18402	0.263656	4.49078	7.09621e-06	0.000233083	Cadps
CG14573	101.712	7.34193	1.63566	4.48867	7.16678e-06	0.000234732	CG14573
sosie	261.377	1.40673	0.31351	4.48705	7.22169e-06	0.000235861	sosie
AnxB10	140.54	-1.71938	0.384009	-4.47745	7.55394e-06	0.000246015	AnxB10
CG43149	75.284	2.40369	0.53731	4.47356	7.6928e-06	0.000249832	CG43149
Obp56e	54.1819	3.6848	0.823974	4.47199	7.74968e-06	0.000250972	Obp56e
CG15212	134.21	2.95159	0.662626	4.45439	8.41324e-06	0.000271698	CG15212
plx	1579.94	-0.720815	0.162162	-4.44502	8.7882e-06	0.000282226	plx
Lcp65Ag1	10941	1.73195	0.389606	4.44539	8.77308e-06	0.000282226	Lcp65Ag1
Agxt	83.5141	-1.94975	0.440087	-4.43038	9.40668e-06	0.000301249	Agxt
CG34375	52.7196	2.91765	0.658852	4.42838	9.49437e-06	0.000303215	CG34375
cher	16084.7	-1.08671	0.24573	-4.42238	9.762e-06	0.000310901	cher
Mkp3	452.032	0.893567	0.202141	4.42051	9.84687e-06	0.00031274	Mkp3
osy	301.758	1.6057	0.363784	4.41388	1.01535e-05	0.000321592	osy
Tep1	38.7509	-2.46175	0.558721	-4.40605	1.05273e-05	0.000332518	Tep1
Cdk2	224.399	2.91058	0.661196	4.402	1.07259e-05	0.000337866	Cdk2
Argk1	76796.2	-1.09681	0.249305	-4.39947	1.08518e-05	0.0003409	Argk1
CG3598	264.735	10.9316	2.48559	4.398	1.09254e-05	0.00034228	CG3598
asRNA:CR45024	14.5237	-6.45381	1.46918	-4.39281	1.11894e-05	0.000349602	asRNA:CR45024
CG14621	334.289	1.2115	0.275904	4.39101	1.12827e-05	0.000350616	CG14621
CG10383	855.497	1.13472	0.258392	4.39145	1.12598e-05	0.000350616	CG10383
Gapdh2	21849.1	-1.10069	0.250728	-4.38997	1.13367e-05	0.000351345	Gapdh2
Spn42De	172.953	1.61666	0.368328	4.38918	1.13777e-05	0.00035167	Spn42De
l(3)80Fg	575.787	1.04665	0.238583	4.38692	1.14969e-05	0.000354407	l(3)80Fg
Spn88Eb	51.6507	-2.39453	0.545922	-4.38621	1.15343e-05	0.00035461	Spn88Eb
CG11786	38.2418	6.1844	1.41144	4.38162	1.17801e-05	0.000361204	CG11786
Taldo	574.025	-1.15793	0.264321	-4.38078	1.18254e-05	0.000361631	Taldo
Lsd-2	3960.97	0.97674	0.223069	4.37866	1.19413e-05	0.000364211	Lsd-2
Osi14	110.526	6.04965	1.3821	4.37713	1.2025e-05	0.000365794	Osi14
Fem-1	1345.4	0.806668	0.184363	4.37543	1.21192e-05	0.00036769	Fem-1
Cralbp	280.446	1.57224	0.359479	4.37367	1.22177e-05	0.000369086	Cralbp
CG13946	18.738	7.65359	1.75001	4.37346	1.22292e-05	0.000369086	CG13946
CG14153	20.6327	5.39337	1.23579	4.36431	1.27525e-05	0.000383873	CG14153
CG34202	526.19	10.9898	2.51935	4.36215	1.28788e-05	0.000386666	CG34202
Frq1	369.899	1.20103	0.275569	4.35835	1.31047e-05	0.000392427	Frq1
CG3984	125.713	-2.82181	0.647839	-4.35572	1.32629e-05	0.000396134	CG3984
eas	703.266	0.740598	0.170136	4.35297	1.34304e-05	0.0004001	eas
CG12990	212.516	1.2632	0.290473	4.34875	1.36917e-05	0.000406835	CG12990
CG3036	1319.08	-0.954643	0.21964	-4.3464	1.3839e-05	0.000410155	CG3036
CG13438	16.2097	7.86479	1.81139	4.34186	1.41281e-05	0.000417647	CG13438
Cad96Ca	617.786	0.913554	0.210708	4.33564	1.45339e-05	0.000428546	Cad96Ca
dyl	253.25	3.48477	0.803918	4.33474	1.45936e-05	0.000428867	dyl
CG14096	20.2641	5.47014	1.26205	4.33435	1.46192e-05	0.000428867	CG14096
CG44666	200.243	6.27365	1.44956	4.32796	1.50498e-05	0.000440378	CG44666
CG10650	128.478	-2.13444	0.493921	-4.32143	1.5502e-05	0.000452463	CG10650
l(2)efl	8742.74	-1.2655	0.293212	-4.316	1.58882e-05	0.000462563	l(2)efl
CG33465	61.4525	-2.42437	0.562252	-4.31188	1.61869e-05	0.000470073	CG33465
CG18294	21.703	6.40284	1.4892	4.29951	1.71175e-05	0.000495848	CG18294
CG32191	89.8881	-2.84278	0.662193	-4.29298	1.76292e-05	0.000509391	CG32191
Cpr66D	79.2854	3.46439	0.807592	4.28977	1.78855e-05	0.000515504	Cpr66D
Tsp39D	234.666	1.36267	0.317994	4.28521	1.82564e-05	0.000524884	Tsp39D
CG5255	11.3611	6.37344	1.48758	4.28445	1.83194e-05	0.000525383	CG5255
scra	97.5817	-2.01508	0.471733	-4.27166	1.94026e-05	0.000555069	scra
CG15711	15.5595	-5.23284	1.2254	-4.27031	1.95201e-05	0.000557046	CG15711
Ccp84Af	13.4773	5.00456	1.17259	4.26797	1.9726e-05	0.000561535	Ccp84Af
l(2)k09913	908.644	-0.771077	0.180725	-4.26658	1.98495e-05	0.000563658	l(2)k09913
PhKgamma	1287.27	-0.876029	0.205666	-4.25947	2.0491e-05	0.000580444	PhKgamma
TwdlO	5572.69	2.30442	0.541298	4.25722	2.06983e-05	0.00058488	TwdlO
Syt7	174.051	1.74079	0.409436	4.25167	2.12179e-05	0.000598097	Syt7
CG5273	2038.32	-0.844222	0.198675	-4.24926	2.14475e-05	0.000603093	CG5273
Fie	201.269	1.82121	0.428775	4.24748	2.16184e-05	0.00060642	Fie
CG3546	362.835	9.00548	2.12089	4.24608	2.17543e-05	0.00060875	CG3546
Uhg1	189.914	1.31773	0.310896	4.2385	2.25022e-05	0.000628155	Uhg1
Obp56d	4204.52	1.80553	0.426168	4.23665	2.26875e-05	0.000631799	Obp56d
CG13443	26.1534	7.58046	1.78978	4.23543	2.28118e-05	0.000633728	CG13443
Snap25	147.247	2.0193	0.47706	4.23279	2.30808e-05	0.00063966	Snap25
lncRNA:CR46488	104.96	1.3615	0.321805	4.23083	2.32828e-05	0.00064371	lncRNA:CR46488
Lsp1gamma	10099.5	-5.66578	1.34102	-4.22499	2.38949e-05	0.000659053	Lsp1gamma
Tsp47F	27.2701	2.20372	0.521842	4.22296	2.41116e-05	0.000663442	Tsp47F
aurB	15.8359	-3.36351	0.796785	-4.22135	2.42847e-05	0.000666616	aurB
CG15890	451.247	1.20794	0.286482	4.21646	2.48163e-05	0.000679589	CG15890
CG16786	330.612	2.73966	0.650235	4.21334	2.51617e-05	0.000686664	CG16786
sut2	76.23	1.99883	0.474496	4.21252	2.52533e-05	0.000686664	sut2
mt:ND4	18362.3	1.56525	0.371566	4.21257	2.52483e-05	0.000686664	mt:ND4
CG4702	97.5836	6.33635	1.50492	4.21043	2.54887e-05	0.000690778	CG4702
mat	1369.85	1.80528	0.428796	4.21011	2.55245e-05	0.000690778	mat
CG5391	681.341	-2.13006	0.507179	-4.19981	2.67135e-05	0.000721265	CG5391
Sobp	196.119	-0.973025	0.231786	-4.19794	2.69354e-05	0.000725557	Sobp
NtR	155.685	-1.16308	0.277323	-4.19396	2.74123e-05	0.000736681	NtR
thoc6	215.356	-2.23536	0.533186	-4.19247	2.7594e-05	0.000739839	thoc6
AttC	46.8929	-3.68299	0.879991	-4.18526	2.84844e-05	0.000761941	AttC
CG13962	69.6255	-2.57351	0.615705	-4.17978	2.9179e-05	0.000778716	CG13962
ect	1315.24	2.29081	0.548185	4.1789	2.92917e-05	0.000779916	ect
CG13893	409.25	0.921366	0.220614	4.17638	2.9619e-05	0.000786815	CG13893
lncRNA:CR43836	326.195	-1.86906	0.448607	-4.16637	3.09484e-05	0.00082024	lncRNA:CR43836
CG5292	161.029	1.42139	0.341435	4.16299	3.14103e-05	0.000830572	CG5292
bib	23.3225	-2.89402	0.695499	-4.16107	3.16759e-05	0.000835679	bib
CG30427	463.817	2.90728	0.699808	4.1544	3.26146e-05	0.000858479	CG30427
CG11668	41.5154	-1.82732	0.440207	-4.15103	3.30976e-05	0.000869209	CG11668
TwdlE	57.9957	2.01813	0.486592	4.14747	3.36176e-05	0.000880859	TwdlE
Tig	1389.46	-1.60743	0.387789	-4.14511	3.39651e-05	0.000887945	Tig
CG11380	148.864	6.86029	1.65946	4.13404	3.56438e-05	0.000929722	CG11380
NT1	85.4935	2.98179	0.723129	4.12345	3.73233e-05	0.000971333	NT1
CalpA	2463.57	0.919592	0.223267	4.11879	3.80861e-05	0.000988953	CalpA
CG14661	67.3215	2.21333	0.538277	4.11189	3.92434e-05	0.00101671	CG14661
CG13360	262.497	-2.31337	0.563245	-4.10721	4.00462e-05	0.00103519	CG13360
CG13737	93.8255	1.51265	0.368376	4.10626	4.0212e-05	0.00103714	CG13737
Atg1	470.739	0.777056	0.189679	4.09669	4.19096e-05	0.00107852	Atg1
CG13024	226.913	1.29154	0.315498	4.09367	4.246e-05	0.00109025	CG13024
asRNA:CR46047	21.9119	5.81043	1.42039	4.09072	4.30041e-05	0.00110177	asRNA:CR46047
Osi2	134.311	5.28509	1.29252	4.08897	4.33298e-05	0.00110765	Osi2
Lcp65Ad	20.4844	4.01481	0.984871	4.07649	4.57213e-05	0.0011606	Lcp65Ad
CG5687	307.275	0.774791	0.19006	4.07655	4.57084e-05	0.0011606	CG5687
CG46523	307.275	0.774791	0.19006	4.07655	4.57084e-05	0.0011606	CG46523
pav	56.9516	-2.27266	0.557562	-4.07607	4.58039e-05	0.0011606	pav
CG13003	349.174	-1.3335	0.327484	-4.07195	4.66219e-05	0.00117616	CG13003
CG4017	14.1779	4.5522	1.11793	4.07199	4.66136e-05	0.00117616	CG4017
CG3604	1403.51	1.91355	0.470272	4.06902	4.72107e-05	0.00118841	CG3604
lin-28	36.3759	3.94471	0.970388	4.06509	4.80138e-05	0.00120599	lin-28
CG10660	70.2344	-1.45578	0.358561	-4.06007	4.90587e-05	0.00122689	CG10660
CG15225	795.254	11.0163	2.7132	4.06027	4.90163e-05	0.00122689	CG15225
SPH93	191.665	-1.70053	0.419738	-4.05142	5.09075e-05	0.00127037	SPH93
CG1092	123.714	-1.56665	0.387121	-4.04691	5.18976e-05	0.00129228	CG1092
Apoltp	421.615	-2.60835	0.64474	-4.04558	5.21947e-05	0.00129688	Apoltp
aos	199.307	1.18852	0.294088	4.04136	5.31423e-05	0.00131759	aos
CG31102	118.611	-1.50127	0.372109	-4.03449	5.47204e-05	0.0013538	CG31102
CG12998	8.738	6.97274	1.72883	4.03322	5.50177e-05	0.00135534	CG12998
Cyp4d1	78.9282	-3.0109	0.746514	-4.03328	5.50038e-05	0.00135534	Cyp4d1
Obp99c	160.824	-2.33789	0.581861	-4.01795	5.87073e-05	0.00144315	Obp99c
TwdlP	889.378	1.89822	0.473329	4.01036	6.06271e-05	0.00148717	TwdlP
Gr28b	145.781	1.9738	0.492373	4.00874	6.10432e-05	0.0014942	Gr28b
18SrRNA-Psi:CR45861	10364.1	-1.77833	0.443873	-4.0064	6.16519e-05	0.00150272	18SrRNA-Psi:CR45861
CG16743	103.919	-1.63562	0.408235	-4.00657	6.16065e-05	0.00150272	CG16743
asRNA:CR31514	124.958	1.30791	0.326556	4.00517	6.19723e-05	0.00150457	asRNA:CR31514
qua	63.535	2.00012	0.499393	4.00511	6.19889e-05	0.00150457	qua
PyK	16977.4	-0.771444	0.192911	-3.99896	6.36212e-05	0.00154094	PyK
asRNA:CR44054	47.4829	-1.58716	0.397369	-3.99417	6.49223e-05	0.00156588	asRNA:CR44054
bun	10455	0.887615	0.222216	3.99437	6.4866e-05	0.00156588	bun
CG7227	19.2012	-2.95472	0.740395	-3.99074	6.5868e-05	0.00158537	CG7227
sti	86.5942	-2.30524	0.577973	-3.98848	6.64974e-05	0.00159718	sti
Muc91C	13.8791	6.65344	1.67106	3.98157	6.84628e-05	0.00164097	Muc91C
CG11241	161.131	-1.35673	0.340954	-3.97921	6.91451e-05	0.00165389	CG11241
lncRNA:CR44830	48.3757	2.28075	0.574058	3.97303	7.09633e-05	0.00169214	lncRNA:CR44830
CG43742	31.188	-1.75602	0.442067	-3.97229	7.11845e-05	0.00169214	CG43742
CG2865	1162.05	0.864135	0.217523	3.97261	7.1089e-05	0.00169214	CG2865
TwdlD	322.66	12.1793	3.07544	3.96019	7.48891e-05	0.00177519	TwdlD
Cpr47Eb	6383.55	1.31244	0.331442	3.95978	7.50178e-05	0.00177519	Cpr47Eb
Adhr	4768.23	-1.24228	0.313755	-3.95939	7.51405e-05	0.00177519	Adhr
Adh	4769.66	-1.24229	0.313819	-3.95863	7.53815e-05	0.00177725	Adh
sit	1769.31	1.32056	0.334457	3.94838	7.86813e-05	0.00185126	sit
qsm	1279.26	-0.610071	0.154588	-3.94642	7.93275e-05	0.00186266	qsm
mol	407.959	1.20537	0.30631	3.93512	8.3154e-05	0.00194854	mol
CG12009	233.067	4.97888	1.26645	3.93137	8.44646e-05	0.00197524	CG12009
CG15239	87.2924	3.57251	0.910049	3.92563	8.65035e-05	0.00201882	CG15239
f	100.665	2.60474	0.664769	3.91826	8.91894e-05	0.0020773	f
BomS1	33.6392	-2.945	0.752219	-3.91508	9.03753e-05	0.00210068	BomS1
CG6726	370.924	-1.16437	0.297527	-3.91349	9.09725e-05	0.00211031	CG6726
Tb	136.612	9.97582	2.54947	3.91289	9.11964e-05	0.00211125	Tb
Lcp65Ac	265.677	1.62162	0.414983	3.90767	9.31895e-05	0.00214876	Lcp65Ac
CG43134	251.886	2.41225	0.617288	3.90782	9.31312e-05	0.00214876	CG43134
CG14566	365.296	1.79226	0.458724	3.90705	9.34291e-05	0.00214999	CG14566
CG9518	47.3302	4.11483	1.05335	3.90642	9.36719e-05	0.00215128	CG9518
CG32091	369.533	0.765119	0.196016	3.90335	9.48703e-05	0.00217164	CG32091
Pfk	6571.08	-0.856527	0.219443	-3.90318	9.49351e-05	0.00217164	Pfk
CG17110	372.512	-1.16615	0.298897	-3.90151	9.55936e-05	0.00218237	CG17110
CG9411	271.282	4.08865	1.04913	3.89718	9.732e-05	0.0022174	CG9411
CG17124	719.734	0.701975	0.180227	3.89495	9.82185e-05	0.00223345	CG17124
lncRNA:CR43301	94.8915	2.44048	0.627822	3.88722	0.000101397	0.00230119	lncRNA:CR43301
CG16926	308.579	-1.9437	0.500308	-3.88501	0.000102326	0.00231771	CG16926
CG15080	123.295	3.3121	0.852791	3.88384	0.000102821	0.00232436	CG15080
CG15394	32.3117	2.03203	0.523623	3.88072	0.000104148	0.00234975	CG15394
lncRNA:Hsromega	1204.83	1.4481	0.373314	3.87903	0.000104873	0.00235689	lncRNA:Hsromega
Cndp2	986.798	-0.983968	0.253641	-3.87938	0.000104724	0.00235689	Cndp2
CG14626	31.4832	2.61967	0.676138	3.87446	0.000106863	0.00239694	CG14626
Ptr	257.714	2.07346	0.535555	3.87161	0.000108119	0.00242039	Ptr
cpo	1043.33	1.52842	0.395078	3.86865	0.00010944	0.0024405	cpo
asRNA:CR46129	66.3865	-1.68495	0.435526	-3.86876	0.00010939	0.0024405	asRNA:CR46129
Muc4B	11.7638	4.95899	1.28422	3.86149	0.000112697	0.00250828	Muc4B
sip2	108.543	-1.87888	0.487095	-3.85732	0.000114637	0.00254652	sip2
PK2-R2	595.742	0.989937	0.256833	3.8544	0.000116014	0.00257055	PK2-R2
CG8654	298.873	-1.33714	0.346941	-3.85408	0.000116164	0.00257055	CG8654
Cyt-b5-r	442.75	-2.0555	0.5334	-3.85357	0.000116408	0.00257101	Cyt-b5-r
CG6154	29.4037	2.31395	0.600771	3.85163	0.000117333	0.00258648	CG6154
Hml	3239.17	-1.55966	0.405406	-3.84716	0.000119494	0.00262909	Hml
CG46491	236.69	-0.931827	0.242321	-3.84543	0.000120342	0.0026427	CG46491
Sam-S	4336.75	1.01212	0.263728	3.83774	0.00012417	0.00272159	Sam-S
Elovl7	1824.84	1.10564	0.288367	3.83414	0.000126003	0.00275652	Elovl7
CG9289	107.047	5.57681	1.45561	3.83125	0.000127493	0.00278385	CG9289
Tpc2	75.0265	3.2633	0.852098	3.82972	0.000128288	0.0027959	Tpc2
CG12017	102.76	3.57663	0.934239	3.82839	0.000128983	0.00280575	CG12017
fat-spondin	178.964	-1.78234	0.465626	-3.82783	0.000129279	0.00280688	fat-spondin
CG33939	88.8939	1.36898	0.357722	3.82692	0.000129754	0.00281191	CG33939
CG43085	139.244	-1.79952	0.470353	-3.82588	0.000130304	0.00281325	CG43085
CG13218	76.6455	3.17838	0.830756	3.8259	0.000130297	0.00281325	CG13218
CDase	114.455	1.02801	0.268822	3.82412	0.000131239	0.00282572	CDase
CG10562	21.49	2.92632	0.765276	3.82387	0.000131372	0.00282572	CG10562
CG44245	26538.1	-0.977725	0.255752	-3.82294	0.000131869	0.00282946	CG44245
CG8545	432.825	0.648833	0.169735	3.82263	0.000132037	0.00282946	CG8545
InR	2940.79	1.08832	0.285017	3.81843	0.000134306	0.00287275	InR
Uhg8	28.3478	2.01718	0.528351	3.81787	0.000134606	0.00287384	Uhg8
lncRNA:SMRG	1252.98	0.996841	0.261266	3.81543	0.000135946	0.00289708	lncRNA:SMRG
TwdlH	109.009	10.6138	2.78265	3.81426	0.00013659	0.00290008	TwdlH
CG31650	442.594	0.647379	0.169708	3.81466	0.000136369	0.00290008	CG31650
CG12947	74.7011	1.93672	0.507969	3.81266	0.000137478	0.00290822	CG12947
AGBE	1637.48	-0.885535	0.232257	-3.81273	0.00013744	0.00290822	AGBE
CG7432	125.056	2.08597	0.5476	3.8093	0.000139361	0.00294267	CG7432
Echs1	2004.12	-0.82811	0.217526	-3.80694	0.000140695	0.00296539	Echs1
CG32548	128.866	6.92586	1.82199	3.80125	0.000143966	0.00302881	CG32548
Faa	898.7	1.5417	0.405627	3.80079	0.000144237	0.00302898	Faa
CG2765	3002.62	0.754149	0.198505	3.79914	0.0001452	0.00304366	CG2765
ltl	976.112	-0.775453	0.204184	-3.79781	0.00014598	0.00304892	ltl
igl	334.97	1.7086	0.449867	3.798	0.000145869	0.00304892	igl
nclb	263.821	0.733111	0.193465	3.78937	0.000151029	0.00314867	nclb
yellow-e2	309.586	-1.16834	0.308505	-3.78711	0.000152408	0.00317169	yellow-e2
TwdlF	212.008	4.62374	1.22106	3.78665	0.000152695	0.00317192	TwdlF
Cpr49Ac	4212.21	-5.33597	1.4109	-3.78195	0.000155602	0.0032265	Cpr49Ac
CG11852	2373.96	1.49133	0.394846	3.77701	0.000158725	0.00328535	CG11852
spirit	112.166	-1.53872	0.407575	-3.7753	0.000159812	0.00330193	spirit
Rpn13	601.321	-0.79656	0.211273	-3.77028	0.000163065	0.00336311	Rpn13
CG11437	57.0356	2.03657	0.540329	3.76913	0.000163819	0.00337263	CG11437
CG13101	118.606	1.21591	0.32298	3.76466	0.000166775	0.00342737	CG13101
CG14089	110.08	6.65112	1.76711	3.76384	0.000167326	0.00343257	CG14089
Idgf5	39.0831	-2.29674	0.610705	-3.7608	0.000169372	0.00346836	Idgf5
CG34461	42.2366	9.22443	2.45358	3.75958	0.000170201	0.00347915	CG34461
CG12256	13.2523	4.48781	1.19472	3.75638	0.00017239	0.00350526	CG12256
asRNA:CR43477	13.2523	4.48781	1.19472	3.75638	0.00017239	0.00350526	asRNA:CR43477
CG42326	194.672	1.56511	0.416559	3.75724	0.0001718	0.00350526	CG42326
CG11370	9208.93	0.972544	0.259005	3.75493	0.000173389	0.00351812	CG11370
Mocs1	166.347	-1.00233	0.266962	-3.75458	0.000173633	0.00351812	Mocs1
CG13066	377.33	6.66684	1.77591	3.75404	0.000174006	0.00351951	CG13066
CG32374	10.3415	7.21655	1.92361	3.75156	0.000175735	0.00353865	CG32374
nrv3	1579.58	1.60233	0.427131	3.75137	0.000175874	0.00353865	nrv3
Hf	63.9233	-2.23748	0.596307	-3.75222	0.000175275	0.00353865	Hf
apolpp	11124.4	-3.1815	0.848672	-3.74879	0.000177687	0.0035689	apolpp
asRNA:CR45600	139.529	-2.30748	0.616607	-3.74222	0.000182405	0.00365708	asRNA:CR45600
CG8736	253.08	-1.53392	0.409941	-3.74179	0.000182711	0.00365708	CG8736
Spn42Dd	234.41	1.32902	0.355243	3.74117	0.000183166	0.00365984	Spn42Dd
Osi20	365.46	12.359	3.30416	3.74044	0.000183696	0.00366408	Osi20
CG14445	866.217	1.27283	0.340334	3.73996	0.000184053	0.00366484	CG14445
Cpr65Ea	518.616	10.0544	2.68944	3.73849	0.000185128	0.00367991	Cpr65Ea
su(r)	769.929	0.805706	0.215899	3.73186	0.000190073	0.00377169	su(r)
Ptp52F	62.6565	-2.13	0.571035	-3.73006	0.000191433	0.00379214	Ptp52F
TwdlV	9.04049	7.02264	1.88394	3.72764	0.000193281	0.0038222	TwdlV
nop5	503.059	0.72796	0.195474	3.72408	0.00019603	0.0038699	nop5
CG32407	40.0299	-1.93295	0.519127	-3.72345	0.000196517	0.00387289	CG32407
CG32647	64.5395	1.65973	0.446288	3.71897	0.000200039	0.00393558	CG32647
CG13051	629.247	4.90485	1.32004	3.71567	0.000202665	0.00398046	CG13051
CG11076	406.809	0.668158	0.179883	3.7144	0.000203688	0.00399375	CG11076
CG44098	765.858	-1.06259	0.286424	-3.70985	0.000207386	0.00405934	CG44098
Tret1-1	1071.17	-1.34041	0.361458	-3.70835	0.000208616	0.00407649	Tret1-1
CG34426	684.742	1.46493	0.395196	3.70685	0.000209851	0.0040937	CG34426
out	236.991	1.06721	0.287968	3.706	0.000210561	0.00410061	out
SP2353	278.567	1.28232	0.346312	3.70278	0.000213253	0.00414602	SP2353
capt	2136.29	-0.600642	0.162676	-3.69227	0.000222264	0.00431395	capt
CG12535	635.443	1.70461	0.462114	3.68872	0.000225383	0.00436714	CG12535
Iris	111.073	-1.86353	0.505616	-3.68566	0.000228112	0.0044126	Iris
pug	439.335	-1.03012	0.279742	-3.6824	0.000231045	0.00446184	pug
Fatp2	215.553	1.10665	0.300611	3.68135	0.000232003	0.00447285	Fatp2
Ldh	9219.03	-1.08942	0.29619	-3.6781	0.000234977	0.00452263	Ldh
CG13069	260.277	5.47321	1.48961	3.67425	0.000238549	0.00458372	CG13069
beat-IIa	97.4411	1.55543	0.423494	3.67286	0.000239852	0.00460109	beat-IIa
qless	771.117	1.02479	0.279804	3.66252	0.000249746	0.00478293	qless
Mnn1	685.305	0.655612	0.179155	3.65947	0.000252739	0.00483223	Mnn1
NimB1	62.5929	-1.48255	0.405199	-3.65881	0.000253387	0.00483659	NimB1
CG11836	110.644	1.11632	0.305169	3.65805	0.000254146	0.00484305	CG11836
CG33333	12.5878	-7.99843	2.18812	-3.6554	0.000256783	0.00487032	CG33333
Kat60	631.137	0.560908	0.153449	3.65534	0.000256844	0.00487032	Kat60
asRNA:CR46034	12.5878	-7.99843	2.18812	-3.6554	0.000256783	0.00487032	asRNA:CR46034
CG15353	1966.86	-1.8408	0.504006	-3.65234	0.000259857	0.00491936	CG15353
CG15022	98.2607	6.2197	1.70387	3.65033	0.000261899	0.00494178	CG15022
asRNA:CR45712	1967.05	-1.84039	0.504124	-3.65067	0.000261558	0.00494178	asRNA:CR45712
dpr9	110.494	2.09916	0.575494	3.64757	0.000264727	0.004987	dpr9
CG42808	1083.98	1.16305	0.319111	3.64464	0.000267764	0.00503597	CG42808
CG13995	73.7746	1.27089	0.34894	3.64216	0.000270364	0.00507659	CG13995
mt:CoII	27337	1.23241	0.338858	3.63694	0.000275896	0.00517203	mt:CoII
Wdr62	4150.51	0.723609	0.199192	3.63272	0.000280453	0.00524894	Wdr62
p24-2	254.818	-1.14209	0.314519	-3.63124	0.000282064	0.00527054	p24-2
CG6329	429.758	1.71591	0.472773	3.62946	0.00028402	0.00529849	CG6329
AMPdeam	2343.54	-0.577145	0.159129	-3.6269	0.000286841	0.00534248	AMPdeam
Srxn	179.914	-1.21712	0.336043	-3.62191	0.000292432	0.00543783	Srxn
CG9759	218.859	2.85449	0.789351	3.61625	0.000298904	0.00554921	CG9759
CG10469	83.5086	-1.65573	0.458097	-3.61437	0.000301077	0.00558057	CG10469
CG13203	29.8671	1.76478	0.488476	3.61283	0.00030287	0.00559883	CG13203
CG7781	238.907	1.18219	0.327232	3.61269	0.000303033	0.00559883	CG7781
Corp	36.0635	-1.5171	0.42015	-3.61086	0.000305185	0.00562228	Corp
y	95.6314	5.41895	1.50077	3.61078	0.000305278	0.00562228	y
CG12506	19.502	5.8157	1.61141	3.60908	0.000307283	0.00565018	CG12506
CG10444	397.505	1.11308	0.308719	3.60549	0.000311561	0.00571972	CG10444
ringer	982.699	1.16579	0.323606	3.60251	0.000315163	0.00577665	ringer
CG5863	66.835	2.41336	0.6706	3.5988	0.000319683	0.00584781	CG5863
CG30269	272.095	-0.911107	0.25322	-3.59809	0.000320567	0.00584781	CG30269
CG30273	272.095	-0.911107	0.25322	-3.59809	0.000320567	0.00584781	CG30273
Drip	311.265	1.08931	0.302854	3.59682	0.000322126	0.00586697	Drip
chinmo	7978.51	1.09712	0.305167	3.59514	0.000324218	0.00589575	chinmo
CG11584	260.895	8.19535	2.27997	3.59449	0.000325024	0.0059011	CG11584
CG5810	1313.67	1.50211	0.418031	3.59331	0.000326508	0.00591873	CG5810
lncRNA:CR45660	44.7326	-1.9267	0.536486	-3.59133	0.000328994	0.00595444	lncRNA:CR45660
CG43291	22.3205	-2.98758	0.83234	-3.58937	0.000331474	0.00598991	CG43291
CG14636	222.187	1.06234	0.296087	3.58792	0.000333331	0.00601404	CG14636
CG14696	278.112	1.14639	0.319613	3.5868	0.000334756	0.00602121	CG14696
CG10663	104.913	1.17533	0.327682	3.58679	0.000334773	0.00602121	CG10663
spz4	165.234	1.3111	0.366273	3.57957	0.00034416	0.00618041	spz4
CG34268	224.959	5.99846	1.67612	3.57878	0.000345199	0.00618942	CG34268
CG42561	137.159	1.34771	0.376723	3.57745	0.000346958	0.0062113	CG42561
uzip	1153.86	0.515986	0.14426	3.57677	0.000347867	0.00621754	uzip
Haspin	219.034	0.918591	0.256849	3.57638	0.000348385	0.00621754	Haspin
CG1213	247.549	2.02121	0.565567	3.57378	0.00035186	0.00626025	CG1213
CG5177	15484.9	-0.843305	0.23597	-3.57378	0.000351864	0.00626025	CG5177
CG31437	54.7692	8.65661	2.42385	3.57143	0.000355036	0.00630696	CG31437
salt	219.273	-1.46472	0.410295	-3.56991	0.000357097	0.0063338	salt
St3	2168.06	-1.1241	0.315333	-3.5648	0.000364139	0.00644878	St3
m	40.4714	3.79749	1.06574	3.56324	0.000366305	0.00647719	m
CG13177	938.096	-0.933068	0.262277	-3.55757	0.000374308	0.00660858	CG13177
Prip	176.462	-1.75876	0.494447	-3.55703	0.000375068	0.00661187	Prip
mt:ND3	1539.86	1.46343	0.411808	3.55367	0.000379899	0.0066868	mt:ND3
mir-9371	64.4227	1.37787	0.387988	3.55133	0.00038329	0.00671043	mir-9371
BomBc3	102.711	-2.03231	0.572349	-3.55083	0.000384024	0.00671043	BomBc3
CG7888	149.615	1.6284	0.45844	3.55205	0.000382243	0.00671043	CG7888
CG6685	71.447	1.4679	0.413408	3.55074	0.000384152	0.00671043	CG6685
Nox	267.033	-1.377	0.3877	-3.55173	0.000382706	0.00671043	Nox
Jheh3	382.986	-0.870788	0.245281	-3.55017	0.000384977	0.00671468	Jheh3
Cpr62Bb	88.1678	5.32825	1.50135	3.54897	0.000386744	0.00673531	Cpr62Bb
CG31075	495.907	-1.58212	0.446658	-3.54213	0.000396907	0.00690187	CG31075
Nmdmc	271.76	-0.951121	0.268598	-3.54106	0.000398521	0.0069195	Nmdmc
CG8501	118.183	-1.5795	0.446132	-3.54044	0.000399458	0.00692534	CG8501
lncRNA:alphagamma-element:CR32865	31.831	4.32266	1.22132	3.53933	0.000401151	0.00693383	lncRNA:alphagamma-element:CR32865
CG8026	1356.53	0.828001	0.23393	3.53952	0.000400849	0.00693383	CG8026
Twdlbeta	174.123	2.87384	0.813093	3.53445	0.000408618	0.00704178	Twdlbeta
mud	150.396	-1.55685	0.44044	-3.53477	0.000408137	0.00704178	mud
mt:Cyt-b	67485	1.91959	0.543277	3.53335	0.000410328	0.00706071	mt:Cyt-b
CG7409	85.5035	1.68816	0.478639	3.527	0.000420303	0.00722157	CG7409
Sodh-2	2560.87	-0.953318	0.270467	-3.52472	0.000423935	0.00726232	Sodh-2
CG45085	1352.81	0.824242	0.233838	3.52484	0.000423734	0.00726232	CG45085
CG42269	149.072	-3.01113	0.855266	-3.52069	0.000430424	0.00736254	CG42269
Argl	71.6542	-1.93538	0.550171	-3.51777	0.000435191	0.00743306	Argl
dpr7	118.447	1.43415	0.407924	3.51573	0.000438543	0.00747923	dpr7
Ugt37A3	30.6041	-4.3032	1.2258	-3.51052	0.000447228	0.00761608	Ugt37A3
asRNA:CR45195	2207.66	-0.940344	0.268003	-3.5087	0.000450303	0.00765714	asRNA:CR45195
LManI	92.1784	-2.12811	0.608416	-3.49779	0.000469131	0.00796555	LManI
lncRNA:CR43196	43.0169	-1.73225	0.495469	-3.49619	0.000471959	0.0080008	lncRNA:CR43196
thetaTry	33.9829	-4.06166	1.16186	-3.49583	0.000472595	0.0080008	thetaTry
Eogt	458.409	-0.715535	0.204745	-3.49476	0.000474496	0.0080212	Eogt
Hand	96.4481	1.21114	0.34693	3.49103	0.000481166	0.00812206	Hand
CG13947	107.999	3.43638	0.984789	3.48946	0.000483996	0.00815788	CG13947
asRNA:CR45995	204.458	7.84165	2.24756	3.48896	0.000484909	0.00816134	asRNA:CR45995
Teh4	88.488	1.65099	0.473788	3.48467	0.00049275	0.00828122	Teh4
CG43707	126.907	1.39737	0.401341	3.48176	0.000498122	0.00835931	CG43707
Gfrl	87.392	1.42737	0.410487	3.47727	0.000506554	0.00848348	Gfrl
stol	106.373	1.83274	0.527097	3.47703	0.000506993	0.00848348	stol
CG6118	117.897	3.43643	0.988457	3.47656	0.000507896	0.00848628	CG6118
CG13049	97.3912	7.96394	2.29208	3.47455	0.000511703	0.00853751	CG13049
mt:ATPase6	24607.3	1.2877	0.370837	3.47242	0.000515784	0.00859317	mt:ATPase6
dsb	28.0416	2.77849	0.800728	3.46996	0.000520538	0.00863494	dsb
CG14207	6601.4	-0.79125	0.228029	-3.46996	0.000520533	0.00863494	CG14207
CG4839	67.0995	-1.67277	0.482044	-3.47016	0.000520146	0.00863494	CG4839
Klp67A	42.3359	-1.7312	0.499321	-3.46711	0.000526087	0.00871445	Klp67A
lncRNA:CR43653	26.8506	2.57046	0.742871	3.46018	0.000539823	0.00892916	lncRNA:CR43653
CG8500	185.2	1.31215	0.379259	3.45976	0.000540651	0.00893003	CG8500
rngo	1111.7	-0.727994	0.210525	-3.45799	0.000544216	0.00897606	rngo
CG34136	82.6871	-1.71739	0.496868	-3.45643	0.000547377	0.0090153	CG34136
GstD9	259.968	0.75562	0.218873	3.45233	0.000555773	0.0091275	GstD9
yip2	2069.31	0.7054	0.20431	3.4526	0.000555205	0.0091275	yip2
CG14990	75.6743	-1.39962	0.405497	-3.45161	0.000557242	0.00913862	CG14990
spz	305.358	-0.937323	0.27184	-3.44806	0.000564625	0.00924654	spz
Pxd	558.611	-4.08686	1.18598	-3.44598	0.000569	0.00929178	Pxd
CG30183	219.755	0.944839	0.274176	3.4461	0.00056874	0.00929178	CG30183
Jabba	662.699	-1.42535	0.413897	-3.44374	0.000573733	0.00935536	Jabba
CG14618	160.509	1.20945	0.351241	3.44337	0.000574516	0.00935536	CG14618
Gip	289.111	-0.839628	0.243922	-3.44219	0.000577019	0.00937171	Gip
Vajk2	9575.26	-0.951362	0.276387	-3.44213	0.000577146	0.00937171	Vajk2
CG5171	1547.36	-1.75218	0.509675	-3.43783	0.000586399	0.00950857	CG5171
Uhg2	81.4769	1.50228	0.43704	3.43738	0.000587362	0.00951081	Uhg2
CG34273	20.3435	3.70358	1.07796	3.43572	0.00059098	0.00954259	CG34273
AstA-R2	166.655	-0.893254	0.259989	-3.43574	0.000590942	0.00954259	AstA-R2
CG7675	1066.78	0.980953	0.285612	3.43457	0.000593495	0.0095698	CG7675
dao	34.9866	1.72758	0.503063	3.43413	0.000594456	0.0095719	dao
kkv	4094.11	-0.740311	0.215684	-3.43239	0.000598294	0.00962027	kkv
CG13068	209.525	4.45954	1.30072	3.4285	0.000606917	0.0097448	CG13068
CG5953	1674.74	1.03151	0.300894	3.42814	0.000607729	0.0097448	CG5953
CG5335	145.085	-1.05699	0.308536	-3.42582	0.000612949	0.00981484	CG5335
tok	204.647	-2.13384	0.623132	-3.42437	0.000616227	0.00985365	tok
firl	33.3067	-2.00107	0.584479	-3.42368	0.00061779	0.00986496	firl
CG9514	83.4591	2.26785	0.662728	3.42198	0.00062166	0.00991302	CG9514
Act42A	1124.67	-1.17691	0.344005	-3.42121	0.000623433	0.00992757	Act42A
ppk6	108.028	1.82036	0.53214	3.42083	0.000624298	0.00992762	ppk6
CG3071	152.822	0.794261	0.232294	3.4192	0.000628051	0.00997355	CG3071
CG9757	8378.11	-0.959274	0.280974	-3.4141	0.000639935	0.0101388	CG9757
Myc	3104.32	1.08558	0.317981	3.41398	0.000640213	0.0101388	Myc
yellow-d	349.008	0.862774	0.252791	3.413	0.000642518	0.0101613	yellow-d
Nepl6	60.4965	-1.9544	0.572902	-3.4114	0.000646298	0.0102071	Nepl6
Octbeta1R	117.399	1.31684	0.386305	3.40882	0.000652457	0.0102902	Octbeta1R
CG31997	2414.23	0.800804	0.234951	3.40838	0.000653491	0.0102925	CG31997
Pdk1	1941.95	0.698424	0.204992	3.40708	0.000656623	0.0103277	Pdk1
DNaseII	70.2282	-2.17376	0.638488	-3.40454	0.000662744	0.0104098	DNaseII
Ak1	2768.65	1.06997	0.314416	3.40304	0.000666407	0.0104531	Ak1
CG14424	1148.52	7.46912	2.19629	3.40079	0.000671904	0.010525	CG14424
Nop60B	806.551	0.625362	0.183931	3.39998	0.000673912	0.0105421	Nop60B
CG32241	16284.3	-1.31837	0.387904	-3.3987	0.000677063	0.0105771	CG32241
lncRNA:CR43626	88.7453	-1.5695	0.462655	-3.39237	0.000692921	0.0108101	lncRNA:CR43626
CG18563	127.872	-1.97973	0.584007	-3.38991	0.000699143	0.0108925	CG18563
TppII	1806.3	-0.586042	0.172984	-3.38784	0.000704459	0.0109605	TppII
asRNA:CR44996	15.8141	-2.74682	0.811262	-3.38586	0.000709544	0.0110247	asRNA:CR44996
CG43139	32.8486	6.67314	1.97301	3.3822	0.000719068	0.0111576	CG43139
Lime	34.9915	-1.71999	0.509261	-3.37742	0.000731704	0.0113385	Lime
Nepl10	49.7801	-2.38357	0.706729	-3.37268	0.0007444	0.0115197	Nepl10
kirre	246.977	0.912134	0.270696	3.36959	0.000752813	0.0116343	kirre
rst	375.25	0.828193	0.245931	3.36758	0.000758299	0.0116877	rst
CG6398	659.357	0.567007	0.168371	3.3676	0.000758242	0.0116877	CG6398
alpha-Est5	218.835	-1.21382	0.360754	-3.36468	0.000766322	0.0117874	alpha-Est5
CG11180	444.659	0.917711	0.272762	3.36451	0.000766808	0.0117874	CG11180
CG33267	158.214	2.63085	0.782317	3.3629	0.00077128	0.0118403	CG33267
betaTub56D	14646.3	-0.586502	0.174533	-3.36041	0.000778267	0.0119317	betaTub56D
CG11147	327.111	0.994635	0.296128	3.3588	0.000782824	0.0119856	CG11147
CG14441	363.875	1.15556	0.344142	3.3578	0.000785664	0.0120132	CG14441
Mdr65	239.885	0.943078	0.281012	3.35601	0.000790762	0.0120751	Mdr65
Shmt	363.605	-0.822309	0.24556	-3.34872	0.000811867	0.012381	Shmt
CG9281	2640.81	0.587628	0.175564	3.34708	0.000816669	0.0124377	CG9281
Spn43Aa	25.1847	-4.30659	1.2869	-3.34648	0.000818442	0.0124483	Spn43Aa
CG11349	412.562	-1.55185	0.46393	-3.34501	0.000822785	0.0124925	CG11349
asRNA:CR45912	129.793	5.51636	1.64925	3.34477	0.000823512	0.0124925	asRNA:CR45912
CG7778	2244.71	-1.35678	0.406406	-3.33848	0.000842392	0.0127621	CG7778
CAH7	501.33	-1.01922	0.305369	-3.33767	0.000844834	0.0127655	CAH7
CG10910	212.41	-4.48937	1.34498	-3.33788	0.000844215	0.0127655	CG10910
CG42237	130.737	1.20352	0.360657	3.33701	0.000846856	0.0127793	CG42237
pit	211.883	0.698094	0.209232	3.33647	0.000848505	0.0127875	pit
snoRNA:Me28S-C993	152.358	2.33608	0.700498	3.33489	0.000853345	0.0128436	snoRNA:Me28S-C993
asRNA:CR45182	139.672	1.19666	0.359041	3.33292	0.000859381	0.0129176	asRNA:CR45182
Ugt35B1	22.3445	-2.4856	0.745974	-3.33202	0.000862189	0.0129429	Ugt35B1
Mur89F	607.852	4.56299	1.36994	3.3308	0.000865957	0.0129826	Mur89F
apn	28.6657	4.60999	1.38448	3.32977	0.000869185	0.0130141	apn
CAH9	706.425	-0.767719	0.230651	-3.32849	0.000873195	0.0130572	CAH9
asRNA:CR46473	158.241	-1.45724	0.437973	-3.32724	0.000877106	0.0130987	asRNA:CR46473
VepD	21.5653	2.04829	0.615939	3.32548	0.000882651	0.0131644	VepD
CG6026	141.049	4.80485	1.44629	3.32218	0.000893166	0.013304	CG6026
CG32365	40.7083	2.06549	0.621966	3.3209	0.000897275	0.013348	CG32365
CG6908	41.3204	2.37596	0.715803	3.3193	0.000902449	0.0133927	CG6908
ImpL1	461.33	2.45811	0.740561	3.31925	0.000902605	0.0133927	ImpL1
NimB2	314.194	-0.861354	0.259603	-3.31797	0.00090675	0.0134369	NimB2
Rgl	639.582	0.605836	0.182765	3.31483	0.000916979	0.0135711	Rgl
CG15118	411.814	-0.585794	0.176788	-3.31355	0.000921192	0.0136159	CG15118
kar	87.7809	-1.05342	0.317951	-3.31317	0.000922461	0.0136172	kar
CG6912	49.2235	-2.57188	0.777564	-3.30762	0.000940926	0.0138695	CG6912
rod	82.9641	-1.4712	0.444832	-3.30731	0.000941955	0.0138695	rod
Glt	2037.1	-1.49004	0.450604	-3.30678	0.000943766	0.0138784	Glt
CG43902	109.377	1.42366	0.430755	3.30503	0.000949663	0.0139473	CG43902
CG14406	47.1977	1.89943	0.575017	3.30325	0.000955706	0.0140182	CG14406
Mdh1	4509.08	-0.872418	0.264198	-3.30213	0.00095952	0.0140563	Mdh1
Cys	1500.38	0.74591	0.225937	3.30141	0.000961992	0.0140746	Cys
AkhR	68.3992	-1.79211	0.542933	-3.30079	0.000964139	0.0140882	AkhR
CG17027	191.239	-1.04027	0.315374	-3.29852	0.000971957	0.0141844	CG17027
CG13857	13.6435	3.52254	1.06822	3.29756	0.000975283	0.0141869	CG13857
aspr	404.119	-0.754407	0.228788	-3.29741	0.000975817	0.0141869	aspr
Oscillin	97.1777	-1.77985	0.539668	-3.29805	0.000973589	0.0141869	Oscillin
CG13217	17.1281	3.52705	1.06999	3.29634	0.000979523	0.0142228	CG13217
CG31183	79.2029	-2.82259	0.85719	-3.29284	0.000991811	0.0143831	CG31183
asRNA:CR44062	112.997	1.56074	0.474294	3.29067	0.000999505	0.0144656	asRNA:CR44062
CG13186	10.8852	-5.27412	1.60299	-3.29017	0.00100126	0.0144656	CG13186
CG30091	11.1445	-3.81616	1.15982	-3.29032	0.00100075	0.0144656	CG30091
asRNA:CR44095	1501.77	0.744221	0.226313	3.28846	0.00100738	0.0145358	asRNA:CR44095
pre-lola-G	165.624	-1.21586	0.370181	-3.2845	0.00102164	0.0147231	pre-lola-G
Spc105R	86.122	-1.63328	0.497673	-3.28184	0.00103133	0.0148443	Spc105R
pHCl-1	111.01	1.29073	0.39348	3.2803	0.00103696	0.0149066	pHCl-1
CG9932	2542.55	-1.01926	0.310992	-3.27744	0.00104753	0.0150211	CG9932
ab	1738.7	1.02858	0.313827	3.27754	0.00104715	0.0150211	ab
CG4465	154.422	-1.18373	0.361373	-3.27564	0.00105422	0.0150982	CG4465
Uhg4	95.0313	1.41005	0.430836	3.27283	0.00106478	0.0152306	Uhg4
CG5541	587.686	-0.646242	0.197567	-3.27101	0.00107165	0.0153098	CG5541
CG9649	73.2344	1.26867	0.388316	3.26712	0.00108649	0.0155026	CG9649
Pop2	406.566	-0.502357	0.153778	-3.26676	0.00108786	0.015503	Pop2
fzy	123.941	-0.970452	0.297325	-3.26394	0.00109875	0.0156388	fzy
tn	7474.95	-0.785779	0.240904	-3.2618	0.00110709	0.0157381	tn
CG3106	42.9873	-4.12943	1.26665	-3.26011	0.00111367	0.0158123	CG3106
Met	490.154	0.84548	0.259414	3.25919	0.0011173	0.0158442	Met
CG12237	234.728	-0.618335	0.190203	-3.25091	0.00115035	0.0162928	CG12237
CG9630	120.918	0.849734	0.261627	3.24788	0.00116266	0.0164464	CG9630
lncRNA:CR33938	36.9324	-4.56589	1.40595	-3.24755	0.00116404	0.0164464	lncRNA:CR33938
Prosalpha1R	74.5312	-1.29344	0.398482	-3.24592	0.0011707	0.0165	Prosalpha1R
Prosalpha1	74.5312	-1.29344	0.398482	-3.24592	0.0011707	0.0165	Prosalpha1
CG8861	48.682	1.98423	0.611414	3.24531	0.00117323	0.0165144	CG8861
Cyp9b2	214.373	-1.20073	0.370026	-3.24498	0.00117459	0.0165144	Cyp9b2
aralar1	1253.68	-0.706206	0.217728	-3.24353	0.0011806	0.0165585	aralar1
tpr	75.7739	3.00734	0.927169	3.24358	0.0011804	0.0165585	tpr
RIOK2	215.153	0.858557	0.265108	3.23852	0.00120153	0.0168316	RIOK2
CG13272	48.8557	2.79966	0.865293	3.23551	0.00121427	0.0169895	CG13272
28SrRNA-Psi:CR45859	50521.5	-1.62165	0.501687	-3.2324	0.00122753	0.0171542	28SrRNA-Psi:CR45859
18SrRNA-Psi:CR41602	48878	-1.51483	0.469387	-3.22725	0.00124987	0.0174452	18SrRNA-Psi:CR41602
GLaz	181.446	1.07374	0.332959	3.22484	0.00126044	0.0175715	GLaz
CG1698	490.953	1.04576	0.324495	3.22273	0.00126977	0.0176801	CG1698
tau	540.798	0.758552	0.23544	3.22185	0.00127365	0.0177128	tau
lncRNA:CR45372	31.7999	4.22011	1.31063	3.21991	0.00128229	0.0178115	lncRNA:CR45372
Sap-r	5111.68	-0.657619	0.204301	-3.21888	0.00128692	0.0178542	Sap-r
CG13674	313.227	6.49673	2.01992	3.21634	0.00129839	0.0179917	CG13674
CG14629	183.554	-1.40304	0.436482	-3.21443	0.00130706	0.0180901	CG14629
CG4950	57.6438	-2.84632	0.88561	-3.21396	0.00130918	0.0180977	CG4950
Lsd-1	419.301	-1.64357	0.511783	-3.21146	0.00132063	0.0182342	Lsd-1
CG15414	405.186	1.02109	0.318067	3.21029	0.001326	0.0182864	CG15414
CG12920	99.4067	1.94897	0.607663	3.20732	0.00133979	0.0184545	CG12920
CG14355	29.3647	-3.18201	0.992386	-3.20642	0.00134397	0.0184901	CG14355
CG9416	452.908	-0.563328	0.175739	-3.20549	0.00134835	0.0185281	CG9416
He	142.861	-1.73076	0.540408	-3.20268	0.00136154	0.0186872	He
Act87E	38606.1	-1.01208	0.316192	-3.20085	0.00137021	0.0187837	Act87E
GNBP3	570.2	-0.626236	0.195681	-3.20028	0.00137292	0.0187986	GNBP3
2SrRNA-Psi:CR40677	1114.39	0.934657	0.292207	3.19861	0.00138092	0.0188857	2SrRNA-Psi:CR40677
cv-d	369.935	-0.922103	0.288343	-3.19794	0.00138414	0.0189073	cv-d
CG9259	237.375	-2.29742	0.7191	-3.19486	0.00139899	0.0190875	CG9259
CG15282	4378.54	1.90237	0.595523	3.19445	0.00140097	0.0190919	CG15282
Nplp2	2611.13	-1.21305	0.379782	-3.19405	0.00140291	0.0190958	Nplp2
Keap1	341.076	1.0091	0.316004	3.19331	0.00140651	0.0191222	Keap1
Obp99b	662.647	-4.09045	1.28133	-3.19236	0.00141117	0.019163	Obp99b
tadr	122.099	-1.3738	0.430571	-3.19065	0.00141952	0.0192311	tadr
pths	393.811	0.614078	0.192457	3.19073	0.00141915	0.0192311	pths
CG10280	11.7656	4.68736	1.47094	3.18665	0.00143931	0.0194763	CG10280
CG32066	270.802	0.632082	0.198375	3.1863	0.00144107	0.0194768	CG32066
mir-10404-5	73.1209	2.33522	0.73297	3.18596	0.00144273	0.0194768	mir-10404-5
Got2	3047.84	-0.653251	0.205112	-3.18485	0.00144828	0.0195289	Got2
TotA	60.869	-3.5869	1.12723	-3.18204	0.0014624	0.0196962	TotA
CG8854	144.556	1.06373	0.334383	3.18118	0.00146676	0.0197319	CG8854
DCX-EMAP	39.7568	1.45446	0.457312	3.18046	0.00147039	0.0197577	DCX-EMAP
Cyt-b5	1214.42	0.745487	0.234515	3.17885	0.0014786	0.0198449	Cyt-b5
dysc	236.164	1.49134	0.469339	3.17754	0.00148532	0.0199119	dysc
CG17109	56.4987	-2.02396	0.637486	-3.1749	0.00149886	0.0200702	CG17109
CG31345	94.5815	1.33833	0.421794	3.17296	0.00150896	0.0201819	CG31345
CG12520	8.62323	3.35896	1.05892	3.17206	0.00151361	0.0202206	CG12520
Eno	26914	-0.718656	0.226624	-3.17114	0.00151841	0.0202612	Eno
alphaTub84B	14095	-0.765969	0.241613	-3.17024	0.00152315	0.020301	alphaTub84B
CG32444	43.5354	-1.77714	0.560808	-3.16889	0.00153022	0.0203717	CG32444
Pc	125.434	0.997946	0.314958	3.16851	0.00153224	0.0203751	Pc
CG9522	62.447	3.18259	1.00485	3.16723	0.001539	0.0204414	CG9522
CG12723	61.8379	6.04242	1.91085	3.16216	0.00156604	0.0207766	CG12723
CG9498	207.225	1.0094	0.319395	3.16036	0.00157574	0.0208813	CG9498
rn	39.4986	-3.22006	1.01943	-3.15868	0.00158487	0.0209782	rn
CG40498	91.8096	1.68758	0.534671	3.15629	0.00159789	0.0211262	CG40498
Col4a1	4481.93	-1.08398	0.343536	-3.15536	0.001603	0.0211695	Col4a1
CG10657	233.582	1.2736	0.403944	3.15292	0.00161647	0.0212986	CG10657
chico	1042.95	0.451148	0.143086	3.15297	0.00161616	0.0212986	chico
sigmar	291.507	0.719127	0.228203	3.15126	0.00162568	0.0213956	sigmar
Cyp4c3	730.875	1.32301	0.420437	3.14676	0.00165093	0.021703	Cyp4c3
CG8738	131.992	-0.72564	0.230643	-3.14616	0.00165428	0.0217223	CG8738
Pgi	7378.01	-0.734926	0.233734	-3.14429	0.00166491	0.0218371	Pgi
mt:CoI	144857	1.08453	0.345143	3.14225	0.00167655	0.0219647	mt:CoI
CG1640	3382.77	-0.554979	0.176654	-3.14162	0.00168014	0.0219868	CG1640
TwdlR	70.5058	9.98511	3.17872	3.14124	0.00168234	0.0219905	TwdlR
CG13795	78.9689	-1.57279	0.500797	-3.14057	0.00168618	0.0220158	CG13795
CG15019	479	0.984866	0.313661	3.1399	0.00169003	0.0220412	CG15019
Mfe2	520.367	-0.610953	0.194611	-3.13935	0.00169323	0.0220579	Mfe2
bab2	548.782	-0.903669	0.287887	-3.13897	0.00169542	0.0220616	bab2
CG6503	12.8698	-2.63765	0.840459	-3.13835	0.00169901	0.0220833	CG6503
Zasp52	16875.9	-0.797207	0.254326	-3.13458	0.001721	0.0223439	Zasp52
CG13847	54.94	2.23716	0.713803	3.13414	0.00172357	0.0223522	CG13847
Pka-R1	3965.43	-0.78495	0.250502	-3.13351	0.00172728	0.0223751	Pka-R1
rl	802.42	0.660097	0.210858	3.13052	0.00174495	0.0225786	rl
CG42369	97.228	-1.4598	0.466439	-3.12967	0.00175003	0.0226189	CG42369
CG42458	38.9358	1.41972	0.454287	3.12516	0.00177711	0.0229208	CG42458
CG41520	966.875	0.875525	0.280158	3.12511	0.00177736	0.0229208	CG41520
CG2816	80.0741	1.35202	0.432686	3.12471	0.00177981	0.0229268	CG2816
osp	764.628	0.721557	0.231013	3.12344	0.00178749	0.023	osp
Got1	2855.52	-0.723521	0.231822	-3.12102	0.00180224	0.0231171	Got1
DptB	20.6374	-5.32633	1.70627	-3.12161	0.00179863	0.0231171	DptB
CG42749	161.158	2.12236	0.680034	3.12096	0.00180261	0.0231171	CG42749
CG11714	102.785	1.01148	0.324294	3.11901	0.00181461	0.0231937	CG11714
CG34248	16.2145	3.34294	1.07173	3.1192	0.00181345	0.0231937	CG34248
Fuca	102.785	1.01148	0.324294	3.11901	0.00181461	0.0231937	Fuca
para	1170.49	1.22952	0.394415	3.11732	0.00182504	0.0233011	para
CG13285	33.0787	2.16352	0.694533	3.11507	0.001839	0.0234274	CG13285
CG14194	210.858	-0.639645	0.205319	-3.11537	0.00183714	0.0234274	CG14194
nsr	56.8929	-1.6279	0.522758	-3.11407	0.00184527	0.0234814	nsr
CG43124	34.7575	-2.36392	0.759985	-3.11049	0.00186779	0.0237417	CG43124
asRNA:CR44108	80.5337	-1.07173	0.344709	-3.10908	0.00187672	0.0238289	asRNA:CR44108
CG43446	8.60321	-3.5059	1.12844	-3.10686	0.00189083	0.0239817	CG43446
CG16986	159.655	-1.16736	0.375788	-3.10643	0.00189359	0.0239904	CG16986
peg	576.71	0.806443	0.259678	3.10555	0.00189923	0.024009	peg
CG13046	157.195	1.09509	0.3526	3.10575	0.00189795	0.024009	CG13046
CG13297	25.4683	2.99772	0.965404	3.10515	0.00190185	0.0240158	CG13297
Rpt5	733.061	-0.798164	0.257455	-3.10021	0.00193386	0.0243933	Rpt5
CG7330	44.1412	2.27957	0.735827	3.09797	0.0019485	0.0245511	CG7330
CG13437	154.931	1.10992	0.358431	3.09661	0.00195746	0.024637	CG13437
CG1440	828.457	-0.586795	0.189524	-3.09616	0.00196048	0.0246481	CG1440
asRNA:CR45682	236.586	1.24465	0.402542	3.09197	0.00198836	0.0249714	asRNA:CR45682
sncRNA:359	1927.8	-0.998589	0.323488	-3.08694	0.00202229	0.02537	sncRNA:359
CG8420	183.111	3.70995	1.20227	3.08578	0.00203022	0.0254417	CG8420
lncRNA:CR44273	26.6147	2.16235	0.700929	3.08497	0.00203574	0.0254832	lncRNA:CR44273
Lgr1	320.044	-1.16885	0.379732	-3.07808	0.0020834	0.0260516	Lgr1
Pglym78	5741.56	-0.933278	0.303278	-3.0773	0.00208884	0.0260764	Pglym78
FarO	239.101	-1.31761	0.428215	-3.07697	0.00209116	0.0260764	FarO
CG2962	193.337	4.36923	1.42004	3.07683	0.00209217	0.0260764	CG2962
CG42751	25.8557	3.53354	1.14869	3.07615	0.00209689	0.026107	CG42751
CG32074	11.6203	4.86081	1.58081	3.07489	0.0021058	0.0261614	CG32074
Idgf2	1118.76	0.774062	0.251731	3.07496	0.00210534	0.0261614	Idgf2
CG43711	11.3648	5.65857	1.84075	3.07405	0.00211175	0.0262071	CG43711
Nufip	45.9233	1.24488	0.405554	3.06959	0.00214356	0.0265732	Nufip
CG6347	19.5256	3.81254	1.24241	3.06868	0.0021501	0.0266257	CG6347
GstS1	432.881	-0.881124	0.287186	-3.06813	0.002154	0.0266454	GstS1
Etf-QO	828.342	-0.570438	0.186109	-3.06507	0.00217616	0.0268906	Etf-QO
CG34155	39.9498	1.75872	0.574138	3.06324	0.00218958	0.0269275	CG34155
Argp	34.4113	-1.66876	0.544726	-3.06349	0.0021877	0.0269275	Argp
Tsp74F	646.402	0.530141	0.173085	3.0629	0.00219202	0.0269275	Tsp74F
bnb	4275	1.61023	0.525749	3.06275	0.00219316	0.0269275	bnb
mir-9382	35.5321	-1.72236	0.562112	-3.06409	0.00218334	0.0269275	mir-9382
AANATL2	36.4141	-2.16901	0.708131	-3.063	0.00219128	0.0269275	AANATL2
CG17751	137.01	-2.03888	0.666101	-3.06091	0.00220663	0.0270641	CG17751
CG46026	42.6187	6.08928	1.99011	3.05977	0.00221506	0.0271386	CG46026
CG31559	15.6034	2.34072	0.765637	3.05722	0.00223397	0.0273412	CG31559
CG8100	68.1944	-1.73269	0.566959	-3.05612	0.00224222	0.0273924	CG8100
C901	24.6309	2.84509	0.930977	3.05603	0.0022429	0.0273924	C901
Cyp4ac1	85.4726	-1.95035	0.639637	-3.04916	0.00229485	0.0279972	Cyp4ac1
Glut4EF	1835.78	0.879982	0.288644	3.04867	0.00229853	0.0280125	Glut4EF
Nep1	487.689	0.716487	0.235049	3.04824	0.00230183	0.028023	Nep1
MFS17	448.097	0.715272	0.235046	3.04311	0.00234146	0.0284755	MFS17
mod	1812.65	0.558608	0.183586	3.04275	0.00234424	0.0284791	mod
Listericin	105.947	-2.20834	0.726484	-3.03976	0.00236765	0.0287031	Listericin
fne	921.762	1.70661	0.561391	3.03997	0.00236603	0.0287031	fne
neo	464.973	3.85483	1.26836	3.03924	0.00237178	0.0287229	neo
Gss1	30.5389	-1.66944	0.550053	-3.03505	0.00240497	0.0290943	Gss1
Prosbeta2	756.176	-0.693461	0.228623	-3.0332	0.00241974	0.0292423	Prosbeta2
Hacd1	243.905	0.836528	0.275976	3.03117	0.00243611	0.0294094	Hacd1
CG17127	64.3555	9.85342	3.25114	3.03076	0.00243941	0.0294184	CG17127
RpL38	5040.66	1.04878	0.346225	3.02918	0.00245216	0.0295412	RpL38
et	67.9057	-1.53928	0.508215	-3.0288	0.00245526	0.0295476	et
Lcp65Ae	584.86	1.74751	0.577383	3.02661	0.00247311	0.0297314	Lcp65Ae
lncRNA:CR44779	304.868	-1.14436	0.378261	-3.02532	0.00248373	0.0298138	lncRNA:CR44779
Fbp2	545.264	-3.53979	1.17012	-3.02515	0.00248513	0.0298138	Fbp2
LKRSDH	106.75	-1.32706	0.438816	-3.02419	0.00249301	0.0298773	LKRSDH
ckd	1469.37	-0.683767	0.226221	-3.02255	0.00250652	0.0300079	ckd
CG43179	17.6288	-2.4686	0.817063	-3.02131	0.00251687	0.0301006	CG43179
Gss2	31.5301	-1.61963	0.536316	-3.01992	0.00252841	0.0301994	Gss2
CG42586	319.424	-2.1146	0.700344	-3.01937	0.00253298	0.0301994	CG42586
CG31775	319.424	-2.1146	0.700344	-3.01937	0.00253298	0.0301994	CG31775
Rpt4	658.547	-0.861734	0.285467	-3.01868	0.00253877	0.0302371	Rpt4
CG42747	67.8466	1.30223	0.432034	3.01417	0.00257681	0.0306584	CG42747
CG30349	255.171	0.608814	0.202143	3.0118	0.00259703	0.0308672	CG30349
grsm	659.52	-1.02397	0.340046	-3.01126	0.00260169	0.0308907	grsm
s-cup	14.8823	1.92252	0.638875	3.00923	0.00261912	0.0310657	s-cup
Adgf-C	158.643	1.05648	0.351677	3.00412	0.00266352	0.0315599	Adgf-C
Tango9	674.624	-0.550836	0.183574	-3.00062	0.0026943	0.0318918	Tango9
CG12355	23.0497	1.86995	0.623285	3.00014	0.00269851	0.0319089	CG12355
Osi18	104.863	8.09027	2.70057	2.99577	0.00273755	0.0323149	Osi18
CG6287	179.683	-1.91538	0.639384	-2.99567	0.00273845	0.0323149	CG6287
alphaTub84D	587.296	-0.670204	0.223919	-2.99306	0.00276194	0.0325255	alphaTub84D
ebd1	89.8286	-0.826713	0.276206	-2.9931	0.00276161	0.0325255	ebd1
Nep6	34.9391	-2.63269	0.879743	-2.99257	0.0027664	0.0325447	Nep6
CG9702	740.439	-0.867724	0.290246	-2.98961	0.00279331	0.0327453	CG9702
CG32944	64.0083	1.15763	0.387139	2.99022	0.00278778	0.0327453	CG32944
Reg-2	53.3629	-1.05921	0.354281	-2.98976	0.00279201	0.0327453	Reg-2
CG13216	34.7056	3.91929	1.31104	2.98945	0.00279481	0.0327453	CG13216
Myo28B1	106.131	-1.45281	0.486161	-2.98832	0.00280514	0.0328329	Myo28B1
CG34267	196.615	4.6389	1.55269	2.98765	0.00281134	0.0328722	CG34267
CG31904	64.7981	-1.6077	0.538239	-2.98696	0.00281762	0.0329122	CG31904
Plod	845.22	-0.833253	0.279099	-2.98551	0.0028311	0.0330362	Plod
CG13247	40.0663	1.68378	0.564049	2.98517	0.00283422	0.0330392	CG13247
CycB	80.7681	-1.51849	0.509227	-2.98195	0.00286415	0.0333206	CycB
CG16798	40.8734	2.66994	0.89532	2.98211	0.00286272	0.0333206	CG16798
CG4577	408.627	1.5043	0.504555	2.98144	0.00286895	0.0333428	CG4577
Gpb5	31.3995	1.60348	0.538265	2.97897	0.00289215	0.0335787	Gpb5
vvl	2713.84	0.7834	0.263111	2.97745	0.00290655	0.033678	vvl
mthl4	1063.76	-0.569568	0.191277	-2.97771	0.00290409	0.033678	mthl4
Nop56	413.958	0.648766	0.217931	2.97693	0.00291147	0.0337011	Nop56
CG42319	278.631	1.17758	0.395623	2.97652	0.00291538	0.0337125	CG42319
asRNA:CR44192	39.4511	-3.87302	1.30149	-2.97583	0.00292195	0.0337547	asRNA:CR44192
Non2	577.699	-0.478292	0.160796	-2.97452	0.00293451	0.0338658	Non2
spz5	127.967	1.14171	0.384089	2.97252	0.00295362	0.0340523	spz5
CanA1	937.991	-0.68503	0.23056	-2.97115	0.00296682	0.0341703	CanA1
pinta	33.8449	-1.53229	0.516262	-2.96804	0.00299705	0.0344693	pinta
Sfxn2	612.727	-0.523113	0.176259	-2.96787	0.00299876	0.0344693	Sfxn2
Marc	167.796	-0.621858	0.209638	-2.96635	0.00301359	0.0346053	Marc
Lip2	60.5247	-2.01058	0.678847	-2.96176	0.00305891	0.0350907	Lip2
asRNA:CR46097	22.9183	-1.67143	0.564415	-2.96136	0.00306285	0.035101	asRNA:CR46097
CG10877	248.41	0.787368	0.265931	2.9608	0.00306843	0.03513	CG10877
CG17600	374.871	-0.669787	0.226334	-2.95928	0.00308355	0.0352681	CG17600
5.8SrRNA-Psi:CR45854	734.746	0.80236	0.271231	2.95821	0.00309431	0.0353561	5.8SrRNA-Psi:CR45854
CG10514	263.513	-1.51833	0.5134	-2.95739	0.00310253	0.0354149	CG10514
Vago	179.574	-1.29764	0.438872	-2.95676	0.00310894	0.035453	Vago
Tsp	535.649	0.778716	0.263469	2.95562	0.0031204	0.0355485	Tsp
EbpIII	4327.78	1.04237	0.352911	2.95364	0.00314052	0.0357071	EbpIII
vkg	2688.2	-1.06448	0.360365	-2.9539	0.00313784	0.0357071	vkg
CG13202	41.8586	-3.97338	1.34582	-2.95239	0.00315324	0.0358164	CG13202
Sytbeta	50.4318	1.57239	0.532701	2.95172	0.00316006	0.0358586	Sytbeta
CG31675	227.074	1.15624	0.391869	2.95057	0.00317189	0.0359574	CG31675
GLS	1193.95	-0.790036	0.267891	-2.94909	0.0031871	0.0360943	GLS
Nlg3	53.5425	1.53472	0.520679	2.94753	0.00320319	0.036241	Nlg3
GM130	349.797	-0.53423	0.181297	-2.9467	0.00321181	0.0363029	GM130
Cyp313a5	16.5034	-3.75356	1.27401	-2.94626	0.00321645	0.0363197	Cyp313a5
Pgm2a	485.143	-0.49754	0.169254	-2.9396	0.00328631	0.0370723	Pgm2a
CG14082	14.0727	2.19745	0.74784	2.9384	0.00329912	0.0371441	CG14082
asRNA:CR43981	118.856	-1.19166	0.405514	-2.93865	0.00329644	0.0371441	asRNA:CR43981
PVRAP	28.7262	2.00494	0.682683	2.93685	0.0033156	0.0372932	PVRAP
Npl4	392.669	-0.666959	0.22714	-2.93634	0.00332114	0.0373191	Npl4
CG11892	380.494	-1.33837	0.45606	-2.93464	0.00333938	0.0374876	CG11892
CG7702	134.805	-1.03668	0.353658	-2.93132	0.00337523	0.0378531	CG7702
Nepl21	153.585	-1.31955	0.450833	-2.9269	0.00342357	0.0383579	Nepl21
Pax	11337	-0.791109	0.270461	-2.92504	0.00344408	0.0385503	Pax
beat-VII	86.5914	1.63194	0.558012	2.92457	0.00344938	0.0385721	beat-VII
CG5641	110.01	-0.730452	0.249982	-2.92202	0.00347773	0.0386693	CG5641
CG8908	52.2711	1.55869	0.533183	2.92337	0.00346264	0.0386693	CG8908
CG2961	19.0067	4.2984	1.47106	2.92198	0.00347819	0.0386693	CG2961
Sirup	5133.5	1.59201	0.54462	2.92316	0.00346499	0.0386693	Sirup
brwl	443.345	0.820549	0.280768	2.92251	0.00347222	0.0386693	brwl
mt:ND1	18455.6	1.15653	0.395756	2.92234	0.00347416	0.0386693	mt:ND1
Fili	99.9187	-1.10903	0.379687	-2.92091	0.0034901	0.0387643	Fili
Prestin	644.616	-0.806288	0.276499	-2.91607	0.00354475	0.0393334	Prestin
CG7294	1146.94	0.694074	0.238134	2.91464	0.00356096	0.0394753	CG7294
magu	419.985	-0.675365	0.231872	-2.91267	0.00358358	0.0396879	magu
CG17974	204.282	-1.0695	0.367343	-2.91145	0.00359759	0.0398048	CG17974
CBP	1517.74	0.851148	0.29238	2.9111	0.00360154	0.0398103	CBP
CG9119	330.247	-0.726016	0.24953	-2.90954	0.00361967	0.0399724	CG9119
kel	1371.89	0.694798	0.238846	2.90898	0.00362613	0.0400054	kel
Mlp84B	24729.8	-0.682226	0.234617	-2.90783	0.00363942	0.0400753	Mlp84B
CG13907	421.423	-1.31484	0.45217	-2.90784	0.00363937	0.0400753	CG13907
lncRNA:CR45750	12.8531	-2.52179	0.867721	-2.90622	0.00365826	0.0402444	lncRNA:CR45750
GlcAT-I	136.439	0.79571	0.273892	2.9052	0.00367019	0.0403371	GlcAT-I
CG34417	21356.4	-0.896361	0.308646	-2.90417	0.00368223	0.0404309	CG34417
lncRNA:CR46482	14.1111	3.80647	1.3109	2.9037	0.0036878	0.0404332	lncRNA:CR46482
Mur2B	502.405	1.75161	0.603261	2.90356	0.00368946	0.0404332	Mur2B
Aldh7A1	200.053	-1.12781	0.388701	-2.90149	0.00371387	0.0406621	Aldh7A1
CG17134	532.726	3.3658	1.16043	2.90049	0.00372586	0.0407546	CG17134
atilla	1479.4	1.21344	0.418437	2.89994	0.00373238	0.0407873	atilla
kuk	166.18	-1.68979	0.582836	-2.89926	0.00374046	0.0408369	kuk
CG42846	188.484	-0.673791	0.232488	-2.89818	0.00375335	0.0409389	CG42846
CG44251	26.9112	-4.07826	1.40747	-2.89758	0.0037605	0.0409781	CG44251
CG13045	12.2113	4.90212	1.69244	2.89648	0.00377379	0.041084	CG13045
UK114	124.052	-1.20112	0.415049	-2.89391	0.00380479	0.0413824	UK114
CG7342	19.4356	-3.76376	1.3011	-2.89276	0.00381876	0.0414752	CG7342
cib	2585.33	-0.857348	0.296392	-2.89261	0.00382051	0.0414752	cib
stw	2227.31	-0.508446	0.175848	-2.8914	0.00383533	0.0415969	stw
CG4911	963.642	-0.733009	0.253546	-2.89103	0.00383977	0.041606	CG4911
CG14984	258.892	1.17154	0.405377	2.89	0.00385242	0.0417038	CG14984
CG12963	47.6835	-1.98069	0.686043	-2.88712	0.0038878	0.0419554	CG12963
dpr21	38.3545	1.78724	0.619079	2.88693	0.00389022	0.0419554	dpr21
Mvk	592.637	-0.516611	0.178916	-2.88745	0.00388383	0.0419554	Mvk
CG33672	592.637	-0.516611	0.178916	-2.88745	0.00388383	0.0419554	CG33672
LanB1	3138.56	-0.636899	0.220776	-2.88482	0.00391633	0.0421976	LanB1
kek3	15.529	2.11368	0.732852	2.88419	0.00392425	0.0422434	kek3
Esp	787.367	0.762322	0.264942	2.87731	0.0040108	0.0431348	Esp
CG46396	69.6118	9.9667	3.46658	2.87508	0.0040393	0.043399	CG46396
Pdp	476.602	-0.544201	0.189301	-2.8748	0.00404289	0.043399	Pdp
CG3726	216.488	1.11461	0.387802	2.87417	0.00405096	0.0434048	CG3726
Drep4	619.001	0.659481	0.229446	2.87423	0.00405018	0.0434048	Drep4
Unc-115b	332.585	-0.989816	0.344752	-2.8711	0.00409045	0.0436826	Unc-115b
CycA	142.813	-1.01575	0.353834	-2.87069	0.00409583	0.0436826	CycA
CG7650	178.428	0.740506	0.257946	2.87079	0.00409452	0.0436826	CG7650
CG30109	51.5603	0.996303	0.346927	2.87179	0.00408149	0.0436826	CG30109
CG44325	1324.86	1.10409	0.384498	2.87152	0.00408502	0.0436826	CG44325
CG31673	427.437	0.617929	0.215452	2.86806	0.00413003	0.0440066	CG31673
NimB3	21.1239	-2.54556	0.887849	-2.86711	0.00414241	0.0440977	NimB3
nod	30.0154	-1.29653	0.452276	-2.86668	0.00414802	0.0441167	nod
CG6044	46.0141	1.44628	0.504653	2.8659	0.00415831	0.0441854	CG6044
CG12824	20.9701	-2.30421	0.804158	-2.86537	0.0041652	0.0442179	CG12824
RpLP0-like	238.795	0.78061	0.272464	2.865	0.00417008	0.044229	RpLP0-like
tnc	3431.07	3.0044	1.04944	2.86287	0.00419825	0.0443822	tnc
ftz-f1	959.913	0.898473	0.313851	2.86274	0.00419993	0.0443822	ftz-f1
CG12826	542.594	1.18161	0.412737	2.86287	0.00419827	0.0443822	CG12826
CG31999	2413.96	-0.574274	0.20057	-2.86321	0.00419378	0.0443822	CG31999
Cpr66Cb	43.8609	6.48861	2.26806	2.86086	0.00422496	0.0446058	Cpr66Cb
Usp5	257.789	-1.23727	0.432622	-2.85994	0.00423725	0.0446946	Usp5
CG2017	566.897	-0.501517	0.175386	-2.85951	0.00424296	0.044714	CG2017
CG14866	62.1501	1.42752	0.49929	2.85909	0.00424855	0.044732	CG14866
CG31370	109.517	0.847009	0.296285	2.85877	0.00425292	0.0447372	CG31370
dnr1	1210.66	0.747806	0.26185	2.85586	0.0042921	0.0451081	dnr1
PGRP-SB1	7.57819	-2.75558	0.964992	-2.85555	0.00429622	0.0451103	PGRP-SB1
Ac76E	1781.13	-0.943373	0.330483	-2.85453	0.0043101	0.0452149	Ac76E
CG3108	182.521	3.2537	1.14007	2.85395	0.00431796	0.0452151	CG3108
CG15293	184.124	-1.6089	0.563732	-2.85401	0.00431706	0.0452151	CG15293
Npc2e	33.8162	-3.98916	1.39806	-2.85335	0.00432614	0.0452596	Npc2e
asRNA:CR45214	162.076	0.801025	0.280827	2.85238	0.00433936	0.0453466	asRNA:CR45214
CR10102	485.857	-1.30105	0.456209	-2.85187	0.00434626	0.0453466	CR10102
Ugt37C1	317.471	1.14205	0.400438	2.85199	0.00434462	0.0453466	Ugt37C1
CG17145	33.7943	-4.33974	1.52262	-2.85018	0.00436947	0.0455065	CG17145
sano	372.834	0.894266	0.313758	2.85018	0.00436947	0.0455065	sano
CG30440	533.304	0.592769	0.207999	2.84986	0.00437382	0.0455106	CG30440
Rhp	187.918	0.729104	0.255871	2.8495	0.00437876	0.0455209	Rhp
Ppa	367.677	-0.951518	0.334141	-2.84766	0.00440423	0.0457445	Ppa
CG42524	191.988	0.914327	0.321473	2.84418	0.00445257	0.0462049	CG42524
conu	1119.91	0.568022	0.199772	2.84336	0.0044641	0.0462829	conu
CG13862	25.454	1.34705	0.473914	2.84239	0.00447764	0.0463816	CG13862
CG33111	731.323	-0.437721	0.154058	-2.84128	0.0044933	0.0464603	CG33111
Pu	663.007	-1.28947	0.453804	-2.84147	0.0044906	0.0464603	Pu
CG44250	57.5002	-3.52142	1.23953	-2.84092	0.00449837	0.046471	CG44250
wdp	2165.96	-0.908959	0.320159	-2.83909	0.00452427	0.0466967	wdp
CG31705	1887.54	-0.53758	0.1894	-2.83833	0.00453507	0.0467663	CG31705
maf-S	302.86	1.11752	0.39391	2.837	0.00455398	0.0469195	maf-S
Gat	135.884	1.25013	0.440723	2.83655	0.00456043	0.0469439	Gat
shop	217.553	-0.722384	0.254771	-2.83543	0.00457642	0.0470665	shop
lncRNA:CR44662	14.2855	2.05651	0.725402	2.835	0.0045826	0.047088	lncRNA:CR44662
ChT	136.262	1.43818	0.507349	2.83469	0.00458695	0.0470907	ChT
CG12224	18.216	-2.01606	0.711525	-2.83344	0.004605	0.0472089	CG12224
GstD2	75.7641	1.37241	0.484382	2.83333	0.00460664	0.0472089	GstD2
CG43125	17.3846	-2.35493	0.831409	-2.83245	0.00461925	0.047254	CG43125
nompA	71.2526	1.65934	0.585774	2.83273	0.00461517	0.047254	nompA
slf	21409.8	0.65405	0.231006	2.83131	0.00463576	0.047381	slf
CG45002	122.655	1.22153	0.431688	2.82965	0.00465982	0.0475847	CG45002
asRNA:CR46269	54.4643	-1.58241	0.559525	-2.82813	0.00468204	0.0477693	asRNA:CR46269
ApepP	451.143	-0.593004	0.209738	-2.82736	0.00469336	0.0478424	ApepP
Idh	2138.28	-0.517307	0.183144	-2.82459	0.00473412	0.0482153	Idh
PPP4R2r	467.15	-0.645696	0.228622	-2.82429	0.00473852	0.0482175	PPP4R2r
CG9095	553.581	1.44973	0.513415	2.82369	0.00474737	0.0482649	CG9095
CG15739	33.9718	-1.31529	0.466016	-2.82242	0.00476631	0.0484148	CG15739
csw	1154.93	0.626277	0.221945	2.82177	0.00477598	0.0484704	csw
asRNA:CR44116	391.157	-0.597879	0.211941	-2.82097	0.00478786	0.0485481	asRNA:CR44116
NimB4	76.5667	-0.998854	0.354192	-2.82009	0.00480095	0.0486381	NimB4
Cpr92F	1045.49	-0.961349	0.341455	-2.81545	0.0048709	0.0493034	Cpr92F
Scgalpha	89.9628	1.30151	0.462409	2.81464	0.00488322	0.0493848	Scgalpha
RpL24-like	1212.47	1.1852	0.421306	2.81315	0.00490592	0.0495708	RpL24-like
Stlk	324.825	0.734743	0.261428	2.8105	0.00494649	0.049937	Stlk
lncRNA:CR44417	96.7123	0.973893	0.346587	2.80995	0.00495492	0.0499784	lncRNA:CR44417
phu	22.8793	-2.78702	0.991942	-2.80966	0.0049594	0.0499799	phu
