# Supplementary material for: Vitamin C Supplementation Mitigates Diabetes-Associated Skeletal Muscle Atrophy
Source: Research Square preprint supplement (doi:10.21203/rs.3.rs-8342512/v1), 2026-02-12
Supplement: Supplementary file 3 [file e379e088cd23bcb197f5214f.xlsx]

## Sheet: results_AA_vs_CT_sig
	baseMean	log2FoldChange	lfcSE	stat	pvalue	padj	gene_id
mthl4	1063.76	2.6269	0.186875	14.057	6.97656e-45	9.15464e-41	mthl4
Ance-5	309.393	-5.79488	0.416419	-13.916	5.06643e-44	3.32408e-40	Ance-5
stw	2227.31	-2.21732	0.178155	-12.446	1.47051e-35	6.43201e-32	stw
CG10953	13842.5	-4.23836	0.35169	-12.0514	1.90649e-33	6.25423e-30	CG10953
NtR	155.685	-4.04264	0.337666	-11.9723	4.96393e-33	1.30273e-29	NtR
CG9993	366.909	-5.94806	0.500571	-11.8825	1.45855e-32	3.18984e-29	CG9993
CG13323	683.644	4.03687	0.351051	11.4994	1.32863e-30	2.4906e-27	CG13323
CG13230	4024.03	-3.30277	0.289315	-11.4159	3.48442e-30	5.71532e-27	CG13230
Hml	3239.17	-4.62138	0.408467	-11.3139	1.11943e-29	1.63213e-26	Hml
CG11777	422.154	2.56985	0.228504	11.2464	2.41182e-29	3.16479e-26	CG11777
CG30457	5444.46	-3.65261	0.338751	-10.7826	4.16076e-27	4.96341e-24	CG30457
Mal-B2	435.725	1.77998	0.165894	10.7296	7.39262e-27	8.08383e-24	Mal-B2
PPO1	1106.83	-4.70682	0.453728	-10.3737	3.26786e-25	3.29853e-22	PPO1
CG13324	245.395	3.96409	0.383534	10.3357	4.85774e-25	4.55309e-22	CG13324
CG14245	158.248	4.84275	0.47018	10.2998	7.06176e-25	6.17763e-22	CG14245
NimC1	232.923	-4.63009	0.453288	-10.2145	1.70821e-24	1.40094e-21	NimC1
Gs2	4820.09	-2.28152	0.227045	-10.0488	9.30313e-24	7.18092e-21	Gs2
CG13311	463.767	3.39638	0.341267	9.95227	2.46487e-23	1.79689e-20	CG13311
rdgC	402.581	1.96646	0.199242	9.86968	5.63463e-23	3.89145e-20	rdgC
Cyp4e3	1793	3.97218	0.411319	9.65716	4.58395e-22	3.00753e-19	Cyp4e3
Cht7	3360.78	-1.9414	0.201435	-9.63789	5.53155e-22	3.45643e-19	Cht7
CG31817	131.433	3.159	0.329048	9.60041	7.96232e-22	4.74916e-19	CG31817
Pxn	1736.37	-3.11263	0.326762	-9.52569	1.63954e-21	9.35395e-19	Pxn
CG9782	2866.65	-2.74643	0.288826	-9.50893	1.92627e-21	1.05319e-18	CG9782
reb	1067.3	-1.77252	0.186581	-9.49999	2.09909e-21	1.10177e-18	reb
5.8SrRNA-Psi:CR45854	734.746	2.55274	0.26995	9.45634	3.18898e-21	1.60945e-18	5.8SrRNA-Psi:CR45854
MFS12	129.319	4.36046	0.462236	9.4334	3.97015e-21	1.92949e-18	MFS12
mat	1369.85	3.99852	0.428179	9.33843	9.77692e-21	4.58188e-18	mat
LpR1	1619.07	2.42547	0.261248	9.28416	1.62988e-20	7.37494e-18	LpR1
PPO2	1050.83	-4.81353	0.51873	-9.27945	1.70352e-20	7.45119e-18	PPO2
2SrRNA-Psi:CR40677	1114.39	2.69493	0.291424	9.24745	2.29908e-20	9.73179e-18	2SrRNA-Psi:CR40677
l(3)mbn	3996.85	-2.10334	0.232397	-9.05066	1.42101e-19	5.82702e-17	l(3)mbn
pdgy	3070.26	2.00521	0.222825	8.99903	2.27724e-19	9.05514e-17	pdgy
whd	2304.92	1.78746	0.200427	8.91827	4.73629e-19	1.82793e-16	whd
CG32486	1088.23	1.81188	0.203318	8.91153	5.03316e-19	1.887e-16	CG32486
TwdlP	889.378	-4.46381	0.504352	-8.85058	8.70667e-19	3.17358e-16	TwdlP
Ppn	4097.53	-3.22324	0.370147	-8.70798	3.09328e-18	1.09703e-15	Ppn
TwdlX	1553.04	-3.018	0.347457	-8.68598	3.75479e-18	1.29659e-15	TwdlX
CG1092	123.714	-3.62145	0.424479	-8.53152	1.44432e-17	4.85959e-15	CG1092
CG17999	121.041	-4.62149	0.54233	-8.52154	1.5744e-17	5.16481e-15	CG17999
CG2017	566.897	1.43611	0.171811	8.35866	6.3435e-17	2.03023e-14	CG2017
Gr28b	145.781	4.06201	0.48778	8.32754	8.25399e-17	2.57878e-14	Gr28b
Lcp65Ab1	4013.27	-2.69054	0.324641	-8.28774	1.15422e-16	3.52224e-14	Lcp65Ab1
Lcp65Ab2	4013.57	-2.6907	0.325089	-8.27683	1.26501e-16	3.77262e-14	Lcp65Ab2
lncRNA:CR42862	55101.6	1.74745	0.211531	8.26093	1.44536e-16	4.21467e-14	lncRNA:CR42862
CG34426	684.742	3.25471	0.394257	8.25531	1.51515e-16	4.32212e-14	CG34426
CG7220	1211.59	1.36194	0.165462	8.23112	1.85474e-16	5.17827e-14	CG7220
Atg16	756.091	1.64488	0.200119	8.21951	2.04328e-16	5.47182e-14	Atg16
CG5070	1267.61	2.21381	0.269263	8.22173	2.00584e-16	5.47182e-14	CG5070
Cda4	1782.8	-2.04394	0.250331	-8.16495	3.21572e-16	8.43933e-14	Cda4
drm	301.359	-1.82744	0.224421	-8.1429	3.85918e-16	9.92944e-14	drm
obst-A	4200.79	-2.91395	0.359967	-8.09505	5.72387e-16	1.4444e-13	obst-A
CG31211	770.021	1.47843	0.182984	8.07958	6.49917e-16	1.6091e-13	CG31211
Ythdc1	1136.1	1.64638	0.204848	8.03708	9.20032e-16	2.23568e-13	Ythdc1
CG3777	2852.15	-2.38526	0.297875	-8.00759	1.16978e-15	2.74104e-13	CG3777
slf	21409.8	-1.85172	0.231243	-8.0077	1.16874e-15	2.74104e-13	slf
CG15414	405.186	-2.69694	0.337084	-8.00079	1.23621e-15	2.84588e-13	CG15414
NimB4	76.5667	-3.27086	0.412292	-7.93337	2.13273e-15	4.82512e-13	NimB4
Gyc88E	139.841	2.70742	0.341562	7.9266	2.2522e-15	5.00904e-13	Gyc88E
CG15597	3564.11	-1.71577	0.216618	-7.92072	2.36135e-15	5.16428e-13	CG15597
brwl	443.345	2.20975	0.279398	7.90899	2.59488e-15	5.58197e-13	brwl
Alp8	224.676	-3.95159	0.502268	-7.8675	3.61804e-15	7.65741e-13	Alp8
mthl3	2682.27	1.42968	0.182032	7.85401	4.02942e-15	8.3927e-13	mthl3
Dhit	851.655	1.43695	0.183328	7.83814	4.57261e-15	9.37528e-13	Dhit
asRNA:CR46133	326.767	1.74492	0.22315	7.81948	5.30434e-15	1.07082e-12	asRNA:CR46133
Cpr67Fa2	1839.04	-2.08377	0.2671	-7.80148	6.11833e-15	1.21644e-12	Cpr67Fa2
Phk-3	3640.76	1.7626	0.227192	7.75821	8.61396e-15	1.68705e-12	Phk-3
CG2765	3002.62	-1.53887	0.200142	-7.68891	1.48389e-14	2.86348e-12	CG2765
GstD2	75.7641	3.63184	0.47367	7.66744	1.75466e-14	3.33691e-12	GstD2
CG31712	799.617	1.70704	0.222748	7.66356	1.80851e-14	3.39017e-12	CG31712
AMPdeam	2343.54	1.20506	0.158293	7.61289	2.68044e-14	4.95391e-12	AMPdeam
Cht6	10364.7	-2.41912	0.320545	-7.54689	4.45767e-14	8.1241e-12	Cht6
asRNA:CR46005	13964.6	-2.49616	0.335572	-7.43852	1.01821e-13	1.83027e-11	asRNA:CR46005
CG10936	2954.76	-1.13369	0.152489	-7.43459	1.04891e-13	1.85998e-11	CG10936
CG13731	68934.2	-3.48868	0.473363	-7.36999	1.70643e-13	2.98557e-11	CG13731
asRNA:CR45270	539.388	1.39049	0.188874	7.36199	1.81195e-13	3.12847e-11	asRNA:CR45270
CG32241	16284.3	-2.85532	0.388078	-7.35759	1.87264e-13	3.19126e-11	CG32241
Gs1	5625.42	-1.71161	0.233783	-7.32136	2.45474e-13	4.12962e-11	Gs1
Hexo2	228.359	-2.1885	0.302231	-7.24114	4.44914e-13	7.39007e-11	Hexo2
Hsp68	3663.68	-3.08579	0.427063	-7.22561	4.98857e-13	8.1825e-11	Hsp68
Glt	2037.1	-3.25143	0.452163	-7.19083	6.43973e-13	1.04324e-10	Glt
CG4847	2573.18	-1.99283	0.277343	-7.18542	6.70016e-13	1.07219e-10	CG4847
Pitslre	1539.21	1.3808	0.192342	7.17888	7.02832e-13	1.09792e-10	Pitslre
nAChRbeta3	115.975	-2.6636	0.370954	-7.18041	6.95008e-13	1.09792e-10	nAChRbeta3
Peritrophin-A	939.941	-2.03522	0.283679	-7.17438	7.26344e-13	1.1213e-10	Peritrophin-A
Pgant4	105.401	3.7973	0.530787	7.15409	8.42302e-13	1.2852e-10	Pgant4
Cpr65Aw	89.1948	-2.7835	0.392902	-7.08447	1.39582e-12	2.10528e-10	Cpr65Aw
CG9701	1205.93	-2.1223	0.300487	-7.06287	1.63097e-12	2.432e-10	CG9701
lectin-24Db	37.1137	-5.67472	0.803684	-7.06089	1.65444e-12	2.43927e-10	lectin-24Db
CG40006	714.712	-1.72117	0.243897	-7.05694	1.70213e-12	2.4817e-10	CG40006
Caper	1017.67	0.998037	0.141633	7.04662	1.83319e-12	2.64341e-10	Caper
Hsp83	12811.1	-2.04261	0.290811	-7.02384	2.15854e-12	3.07873e-10	Hsp83
Cpr67Fa1	1898.52	-2.01585	0.287174	-7.01963	2.22459e-12	3.13882e-10	Cpr67Fa1
Ypel	577.57	1.74253	0.248443	7.0138	2.31934e-12	3.23771e-10	Ypel
verm	11609.7	-1.58044	0.226208	-6.98668	2.81476e-12	3.88793e-10	verm
Lcp65Ag2	4596.24	-2.96241	0.424898	-6.97204	3.12376e-12	4.26979e-10	Lcp65Ag2
CG15530	53.8202	3.39101	0.486712	6.96717	3.23385e-12	4.3747e-10	CG15530
qsm	1279.26	-1.0786	0.156045	-6.9121	4.77539e-12	6.39414e-10	qsm
Lcp65Ag3	12128	-2.3237	0.338134	-6.87213	6.32507e-12	8.38359e-10	Lcp65Ag3
CG6660	147.823	-2.46946	0.359694	-6.86545	6.62832e-12	8.69768e-10	CG6660
Cdc7	548.65	-1.15548	0.168474	-6.8585	6.95881e-12	8.9523e-10	Cdc7
rudhira	3982.12	1.53707	0.224086	6.85929	6.92029e-12	8.9523e-10	rudhira
Xe7	1199.92	1.25192	0.182795	6.84872	7.45119e-12	9.32963e-10	Xe7
CG8501	118.183	-3.22619	0.471083	-6.84845	7.46541e-12	9.32963e-10	CG8501
CG17104	940.691	-1.68524	0.246032	-6.84969	7.40104e-12	9.32963e-10	CG17104
frm	28957.2	-1.98527	0.290224	-6.84046	7.89375e-12	9.77186e-10	frm
serp	9774.63	-1.77713	0.26055	-6.82071	9.05898e-12	1.10851e-09	serp
CG11350	10734.3	-2.37148	0.34774	-6.81969	9.12355e-12	1.10851e-09	CG11350
Col4a1	4481.93	-2.343	0.344041	-6.81024	9.7436e-12	1.17299e-09	Col4a1
Tsp	535.649	-1.84572	0.272075	-6.78385	1.17014e-11	1.39587e-09	Tsp
CG6432	223.555	-2.51876	0.371796	-6.77458	1.24772e-11	1.47501e-09	CG6432
cal1	4199.52	1.22799	0.183493	6.69233	2.19645e-11	2.57338e-09	cal1
Lcp4	57218.9	-2.39974	0.359504	-6.67516	2.46962e-11	2.86782e-09	Lcp4
Cyp18a1	808.346	-2.02537	0.304497	-6.65155	2.9003e-11	3.33839e-09	Cyp18a1
Cont	2165.82	-1.04364	0.15702	-6.64653	3.00084e-11	3.42409e-09	Cont
asRNA:CR44029	385.396	1.72133	0.25922	6.64041	3.12811e-11	3.53854e-09	asRNA:CR44029
eater	153.279	-4.64482	0.700639	-6.62941	3.37027e-11	3.77988e-09	eater
CG8036	1679.78	-1.81174	0.274465	-6.60098	4.08445e-11	4.54205e-09	CG8036
CG6845	217.093	1.77306	0.269398	6.58157	4.65495e-11	5.13296e-09	CG6845
betaTub60D	1388.86	-1.17044	0.177925	-6.57828	4.75919e-11	5.20418e-09	betaTub60D
vkg	2688.2	-2.36687	0.361192	-6.55293	5.64182e-11	6.11835e-09	vkg
Drep4	619.001	1.49979	0.229018	6.5488	5.80006e-11	6.2384e-09	Drep4
in	64.9306	-2.74881	0.421051	-6.52844	6.64572e-11	7.08984e-09	in
CG9812	1179.54	-1.67341	0.2566	-6.52146	6.96255e-11	7.36795e-09	CG9812
Paip2	2867	1.97881	0.304048	6.50821	7.60503e-11	7.98346e-09	Paip2
Atg18a	589.757	1.08058	0.166411	6.4934	8.3918e-11	8.72632e-09	Atg18a
pio	2689.06	-0.897426	0.138226	-6.49244	8.44569e-11	8.72632e-09	pio
yellow-h	327.962	1.75225	0.269987	6.49012	8.57653e-11	8.79228e-09	yellow-h
Lrch	373.167	1.37961	0.212924	6.47937	9.2106e-11	9.36911e-09	Lrch
Nplp2	2611.13	-2.46513	0.380606	-6.47686	9.365e-11	9.45289e-09	Nplp2
retm	297.298	1.48735	0.229778	6.47298	9.60907e-11	9.62521e-09	retm
flap	2523.74	-1.52533	0.235705	-6.47136	9.71269e-11	9.6553e-09	flap
sas	3081.07	-1.62048	0.25058	-6.46695	1.00003e-10	9.86646e-09	sas
CG42807	604.735	2.5619	0.396827	6.45596	1.07538e-10	1.05307e-08	CG42807
Sgsf	189.731	25.1827	3.90695	6.44563	1.1512e-10	1.09613e-08	Sgsf
CG14598	312.055	-2.82012	0.437489	-6.44614	1.14731e-10	1.09613e-08	CG14598
exp	1279.73	-1.06182	0.16474	-6.44542	1.15277e-10	1.09613e-08	exp
Act5C	16777.5	-1.16233	0.180246	-6.44858	1.12905e-10	1.09613e-08	Act5C
28SrRNA-Psi:CR45853	1152.83	-3.36395	0.523597	-6.4247	1.3213e-10	1.24735e-08	28SrRNA-Psi:CR45853
CG7457	2880.12	1.61491	0.251992	6.40859	1.46876e-10	1.37665e-08	CG7457
Idh	2138.28	-1.17383	0.184036	-6.37829	1.79078e-10	1.66657e-08	Idh
CG13676	3597.91	-1.11039	0.174364	-6.36822	1.9123e-10	1.76712e-08	CG13676
CG30151	352.121	1.73447	0.272447	6.36627	1.93675e-10	1.7772e-08	CG30151
CG9896	175.748	2.04197	0.320933	6.36261	1.9836e-10	1.80755e-08	CG9896
CG11438	152.129	-2.07015	0.325814	-6.35378	2.10084e-10	1.90119e-08	CG11438
CG30440	533.304	-1.36395	0.215016	-6.34351	2.24587e-10	2.01852e-08	CG30440
uzip	1153.86	-0.935428	0.147496	-6.34204	2.26744e-10	2.02404e-08	uzip
Mcad	2700.01	1.75793	0.277652	6.33141	2.42934e-10	2.15391e-08	Mcad
EDTP	557.671	1.05799	0.167325	6.32296	2.56601e-10	2.25981e-08	EDTP
dbr	576.692	1.08159	0.171152	6.31945	2.62495e-10	2.2963e-08	dbr
CG34331	119.529	-2.54739	0.403609	-6.31151	2.76319e-10	2.40123e-08	CG34331
CG30357	48.523	2.53584	0.401878	6.30997	2.79098e-10	2.40942e-08	CG30357
CG3604	1403.51	2.96088	0.470134	6.29795	3.01601e-10	2.58667e-08	CG3604
CG4020	322.451	-2.34362	0.372574	-6.29036	3.1673e-10	2.69879e-08	CG4020
lncRNA:CR45660	44.7326	-3.85764	0.615157	-6.27099	3.58766e-10	3.03725e-08	lncRNA:CR45660
CG1113	38.0497	3.77959	0.605837	6.23863	4.41431e-10	3.71312e-08	CG1113
alphaTub85E	1173.5	-1.65106	0.26492	-6.23232	4.59587e-10	3.84121e-08	alphaTub85E
CG5326	827.123	-1.98972	0.319638	-6.22493	4.81776e-10	4.00118e-08	CG5326
Lcp65Ag1	10941	-2.42839	0.390315	-6.22162	4.92047e-10	4.06078e-08	Lcp65Ag1
hoe2	559.962	1.58035	0.254895	6.19999	5.64678e-10	4.63107e-08	hoe2
yip2	2069.31	1.26582	0.204293	6.1961	5.78793e-10	4.71734e-08	yip2
CG10407	161.903	1.78895	0.289074	6.18857	6.07119e-10	4.91766e-08	CG10407
Mfe2	520.367	-1.22247	0.197964	-6.17522	6.60719e-10	5.31899e-08	Mfe2
Fst	4731.91	2.96529	0.480639	6.16947	6.85205e-10	5.48248e-08	Fst
Tsen15	257.074	1.43411	0.232516	6.16779	6.92495e-10	5.50723e-08	Tsen15
CG9521	573.663	-2.11563	0.343125	-6.16579	7.01331e-10	5.54389e-08	CG9521
CG30008	194.971	-3.08559	0.501028	-6.15851	7.34305e-10	5.76979e-08	CG30008
unk	1320.89	1.84098	0.299335	6.15023	7.73698e-10	6.01176e-08	unk
28SrRNA-Psi:CR45860	7649.16	-2.87994	0.468274	-6.15012	7.74262e-10	6.01176e-08	28SrRNA-Psi:CR45860
CG9119	330.247	-1.56791	0.255001	-6.14863	7.81553e-10	6.03267e-08	CG9119
CG17600	374.871	-1.41968	0.231068	-6.14397	8.04849e-10	6.17616e-08	CG17600
PH4alphaNE1	118.028	-2.50006	0.406989	-6.14281	8.10766e-10	6.18539e-08	PH4alphaNE1
PNUTS	1766.28	1.17996	0.193118	6.11002	9.96171e-10	7.55593e-08	PNUTS
28SrRNA-Psi:CR41609	13715.1	-2.92332	0.479296	-6.09919	1.06604e-09	8.03941e-08	28SrRNA-Psi:CR41609
TwdlO	5572.69	-3.31364	0.543836	-6.09308	1.10761e-09	8.30517e-08	TwdlO
CG8369	646.937	1.98974	0.328957	6.04862	1.46089e-09	1.08919e-07	CG8369
hfp	1130.13	1.36384	0.225875	6.03806	1.55977e-09	1.15257e-07	hfp
lncRNA:CR43650	413.311	1.98662	0.329037	6.03768	1.56346e-09	1.15257e-07	lncRNA:CR43650
LamC	2415.55	-1.09286	0.181036	-6.03671	1.57291e-09	1.15306e-07	LamC
CG34043	187.57	2.53291	0.419688	6.03523	1.58737e-09	1.15719e-07	CG34043
CG7458	39.3392	-2.85381	0.473373	-6.02866	1.65321e-09	1.19853e-07	CG7458
asRNA:CR44690	210.613	1.62569	0.269716	6.02743	1.66592e-09	1.2007e-07	asRNA:CR44690
lncRNA:CR45361	117.468	2.45686	0.407669	6.0266	1.6745e-09	1.2007e-07	lncRNA:CR45361
lncRNA:CR45372	31.7999	7.74844	1.2866	6.0224	1.71854e-09	1.22558e-07	lncRNA:CR45372
Mcr	1399.18	-0.995333	0.165303	-6.02127	1.73059e-09	1.2275e-07	Mcr
Drs	43.3824	4.01407	0.667047	6.01767	1.76947e-09	1.24833e-07	Drs
ckd	1469.37	-1.36294	0.22736	-5.99463	2.03953e-09	1.43116e-07	ckd
CG16904	89.3033	-3.46008	0.57756	-5.99086	2.08736e-09	1.45693e-07	CG16904
CG9799	178.342	-1.43052	0.239236	-5.97954	2.23771e-09	1.54052e-07	CG9799
form3	2118.03	-1.5072	0.252017	-5.98057	2.22355e-09	1.54052e-07	form3
tow	233.009	1.75046	0.292759	5.9792	2.24233e-09	1.54052e-07	tow
pbl	588.51	1.32171	0.221095	5.97803	2.25848e-09	1.54353e-07	pbl
EbpIII	4327.78	2.10856	0.352845	5.97587	2.28868e-09	1.55606e-07	EbpIII
CG31019	218.273	1.98591	0.332441	5.97372	2.31898e-09	1.56854e-07	CG31019
Zip89B	315.061	-1.51826	0.254353	-5.96913	2.38518e-09	1.60505e-07	Zip89B
18SrRNA-Psi:CR45861	10364.1	-2.64183	0.44403	-5.94967	2.6868e-09	1.79879e-07	18SrRNA-Psi:CR45861
Cpr47Eg	14503.4	-2.89044	0.48603	-5.94705	2.73013e-09	1.81234e-07	Cpr47Eg
chico	1042.95	0.851877	0.14325	5.94678	2.73468e-09	1.81234e-07	chico
Gfat1	6945.08	-1.11756	0.18884	-5.91801	3.25851e-09	2.14865e-07	Gfat1
Ada2b	352.569	1.11143	0.188646	5.8916	3.8247e-09	2.50939e-07	Ada2b
Cyp4d2	180.373	1.58793	0.269821	5.88512	3.97765e-09	2.59676e-07	Cyp4d2
CG13796	193.824	2.58722	0.439936	5.8809	4.08031e-09	2.65058e-07	CG13796
CG10077	6128.29	1.44904	0.246808	5.87114	4.32797e-09	2.79762e-07	CG10077
Cyp4g1	14679.6	-2.26481	0.386453	-5.86049	4.6149e-09	2.96847e-07	Cyp4g1
sit	1769.31	-1.97213	0.337439	-5.84441	5.08362e-09	3.25401e-07	sit
Sobp	196.119	1.2887	0.220766	5.8374	5.30218e-09	3.37744e-07	Sobp
Tsp74F	646.402	1.00716	0.173166	5.81613	6.02247e-09	3.81772e-07	Tsp74F
Sr-CI	452.426	-3.3972	0.584723	-5.80993	6.2499e-09	3.94285e-07	Sr-CI
CG10948	537.789	1.31322	0.226918	5.78721	7.15653e-09	4.4932e-07	CG10948
CG17230	468.519	1.18019	0.203972	5.78603	7.20683e-09	4.50324e-07	CG17230
lncRNA:CR43334	1100.8	1.79915	0.311333	5.77886	7.52065e-09	4.67706e-07	lncRNA:CR43334
CG13983	157.027	-20.0271	3.46689	-5.77668	7.61888e-09	4.7158e-07	CG13983
CG31832	172.206	-3.54292	0.613494	-5.77499	7.69587e-09	4.74109e-07	CG31832
CG31321	911.557	-1.98078	0.344037	-5.75748	8.53776e-09	5.23516e-07	CG31321
asRNA:CR44962	148.299	-2.84375	0.494047	-5.75604	8.61125e-09	5.25566e-07	asRNA:CR44962
Smyd3	166.405	1.62725	0.283208	5.74578	9.14998e-09	5.55862e-07	Smyd3
asRNA:CR44509	53.8271	4.67148	0.816493	5.7214	1.05651e-08	6.3887e-07	asRNA:CR44509
Obp56e	54.1819	4.68898	0.822209	5.7029	1.17784e-08	7.08974e-07	Obp56e
Vajk2	9575.26	-1.57575	0.276536	-5.69817	1.21101e-08	7.25609e-07	Vajk2
lncRNA:CR43626	88.7453	2.39714	0.421832	5.68268	1.32601e-08	7.90903e-07	lncRNA:CR43626
plx	1579.94	0.913254	0.161073	5.66983	1.4294e-08	8.48712e-07	plx
CG5535	322.938	-1.64842	0.290882	-5.66696	1.4535e-08	8.59137e-07	CG5535
asRNA:CR46092	137.102	-2.40769	0.425272	-5.66153	1.5003e-08	8.82825e-07	asRNA:CR46092
mt:lrRNA	1.66334e+06	2.5381	0.448568	5.65823	1.5294e-08	8.95928e-07	mt:lrRNA
CG2321	366.056	1.42168	0.251608	5.65039	1.60085e-08	9.33613e-07	CG2321
CG12990	212.516	1.64227	0.290891	5.64564	1.64564e-08	9.55491e-07	CG12990
Ip6k	1206.1	1.28766	0.228832	5.62711	1.83254e-08	1.05932e-06	Ip6k
CG2157	537.022	1.60073	0.284588	5.62474	1.85786e-08	1.06925e-06	CG2157
Acbp2	192.804	-1.79819	0.32017	-5.61636	1.95021e-08	1.1175e-06	Acbp2
Dscam4	182.355	2.66865	0.477241	5.59184	2.24677e-08	1.28183e-06	Dscam4
CG8492	2007.29	-1.78809	0.31987	-5.59007	2.26976e-08	1.28934e-06	CG8492
cv-d	369.935	-1.6309	0.292312	-5.57932	2.41461e-08	1.36571e-06	cv-d
Iml1	596.878	1.14458	0.206117	5.55306	2.80707e-08	1.58088e-06	Iml1
Fem-1	1345.4	1.02458	0.184598	5.55035	2.85096e-08	1.59873e-06	Fem-1
asRNA:CR46128	380.729	1.41332	0.254745	5.54797	2.88999e-08	1.61372e-06	asRNA:CR46128
CG17560	452.196	-2.19409	0.396108	-5.53912	3.03997e-08	1.68314e-06	CG17560
CG8483	983.377	-2.0575	0.371436	-5.53931	3.03658e-08	1.68314e-06	CG8483
CG31103	329.461	-2.47716	0.447421	-5.53653	3.08523e-08	1.70103e-06	CG31103
axed	291.537	1.26784	0.229292	5.52936	3.21409e-08	1.76466e-06	axed
alpha-Est3	346.486	1.38806	0.251083	5.52827	3.23407e-08	1.76823e-06	alpha-Est3
Cat	1856.65	-1.22586	0.221897	-5.52445	3.30526e-08	1.79965e-06	Cat
CG6908	41.3204	3.91829	0.709455	5.52296	3.33329e-08	1.80741e-06	CG6908
Nep3	462.406	1.51994	0.27561	5.51483	3.49116e-08	1.88523e-06	Nep3
18SrRNA-Psi:CR41602	48878	-2.58701	0.469421	-5.51106	3.56669e-08	1.91812e-06	18SrRNA-Psi:CR41602
28SrRNA-Psi:CR45859	50521.5	-2.76306	0.501722	-5.50717	3.64656e-08	1.95307e-06	28SrRNA-Psi:CR45859
CG10623	656.078	1.49671	0.272045	5.5017	3.76142e-08	2.0064e-06	CG10623
Desi	63.6112	2.67058	0.486272	5.49194	3.97532e-08	2.11191e-06	Desi
srl	409.75	-1.33885	0.244372	-5.47874	4.28371e-08	2.26657e-06	srl
Pih1D1	770.597	1.0128	0.186096	5.44237	5.25777e-08	2.77078e-06	Pih1D1
Nepl19	53.6869	-4.09803	0.753846	-5.43616	5.44403e-08	2.85746e-06	Nepl19
Sc2	562.575	-1.27037	0.233955	-5.42997	5.63623e-08	2.94656e-06	Sc2
CG9372	567.099	-1.5871	0.292766	-5.42103	5.9256e-08	3.07507e-06	CG9372
CG4950	57.6438	-5.33351	0.983873	-5.42093	5.92892e-08	3.07507e-06	CG4950
norpA	824.232	1.38886	0.25646	5.41551	6.11139e-08	3.15723e-06	norpA
CG1368	1573.15	-1.80323	0.33311	-5.41332	6.18655e-08	3.18352e-06	CG1368
sqa	1523.23	1.01774	0.188041	5.41232	6.2215e-08	3.189e-06	sqa
dmGlut	510.883	-1.93763	0.358899	-5.39881	6.70838e-08	3.42519e-06	dmGlut
CG5953	1674.74	1.62227	0.30087	5.39193	6.97032e-08	3.54514e-06	CG5953
aru	938.177	-0.920061	0.171125	-5.37653	7.59362e-08	3.84724e-06	aru
CG16762	702.943	1.68743	0.314187	5.37077	7.83994e-08	3.95676e-06	CG16762
CG15515	1228.03	-2.31349	0.430818	-5.36999	7.87399e-08	3.95872e-06	CG15515
CG6739	430.695	-1.31306	0.244684	-5.36635	8.03451e-08	4.024e-06	CG6739
unc-13	1935.04	1.32097	0.246383	5.36145	8.25573e-08	4.11907e-06	unc-13
conu	1119.91	1.06945	0.199791	5.35285	8.65784e-08	4.30334e-06	conu
thw	1950.64	-1.8785	0.351403	-5.34573	9.00525e-08	4.42573e-06	thw
Hez	129.257	1.43778	0.268925	5.34637	8.97336e-08	4.42573e-06	Hez
CG6709	129.257	1.43778	0.268925	5.34637	8.97336e-08	4.42573e-06	CG6709
Tep3	1694.7	-1.0253	0.191949	-5.34151	9.21744e-08	4.51311e-06	Tep3
SPARC	591.356	-1.60534	0.300628	-5.33996	9.2968e-08	4.53504e-06	SPARC
CG32813	372.069	1.03553	0.19421	5.33202	9.7127e-08	4.72037e-06	CG32813
PIG-X	60.6585	2.56387	0.48104	5.32985	9.82957e-08	4.75954e-06	PIG-X
lncRNA:CR45279	222.529	-1.59822	0.300254	-5.3229	1.02126e-07	4.92681e-06	lncRNA:CR45279
Plod	845.22	-1.49407	0.280755	-5.32161	1.02855e-07	4.94383e-06	Plod
nahoda	2788.94	-1.24644	0.234424	-5.31702	1.0548e-07	5.0515e-06	nahoda
Pdcd4	6957.2	1.16571	0.219379	5.31367	1.07441e-07	5.12668e-06	Pdcd4
CG2841	1183.46	-1.08224	0.205152	-5.2753	1.32539e-07	6.30137e-06	CG2841
Pcp	412.289	-1.88995	0.358949	-5.26522	1.40019e-07	6.63297e-06	Pcp
Stip1	969.466	-1.0278	0.195624	-5.25397	1.48854e-07	7.02611e-06	Stip1
CG14957	72.8528	2.60303	0.496341	5.24443	1.56766e-07	7.37308e-06	CG14957
Lcp3	72661.8	-2.34094	0.446568	-5.24207	1.58784e-07	7.4413e-06	Lcp3
pre-mod(mdg4)-C	127.155	1.38711	0.264918	5.236	1.64093e-07	7.63556e-06	pre-mod(mdg4)-C
pre-mod(mdg4)-AB	127.155	1.38711	0.264918	5.236	1.64093e-07	7.63556e-06	pre-mod(mdg4)-AB
CG14566	365.296	-2.49834	0.477833	-5.22848	1.70906e-07	7.92446e-06	CG14566
Cpr65Ax1	853.217	-2.46327	0.471437	-5.22503	1.74127e-07	8.01718e-06	Cpr65Ax1
CG2493	405.512	-1.32575	0.253719	-5.22529	1.73887e-07	8.01718e-06	CG2493
sala	127.799	2.03815	0.390707	5.21657	1.82265e-07	8.33336e-06	sala
CG43355	127.799	2.03815	0.390707	5.21657	1.82265e-07	8.33336e-06	CG43355
CG14292	1145.2	1.92246	0.368752	5.21342	1.8539e-07	8.44683e-06	CG14292
CG14132	1034.79	-1.56869	0.300979	-5.21196	1.86858e-07	8.48424e-06	CG14132
CG13096	303.399	-1.24188	0.238441	-5.20833	1.90548e-07	8.62196e-06	CG13096
CG13705	3701.64	-2.82205	0.542699	-5.20003	1.99253e-07	8.98489e-06	CG13705
Rbp1-like	1146.96	1.40042	0.269879	5.18906	2.11364e-07	9.49834e-06	Rbp1-like
CG42566	41.0824	-2.69281	0.519402	-5.18443	2.16671e-07	9.70363e-06	CG42566
MED6	319.591	1.41185	0.272845	5.17456	2.28448e-07	1.01963e-05	MED6
CG42751	25.8557	5.87298	1.1353	5.17307	2.30278e-07	1.02431e-05	CG42751
Ugt49B1	2697.07	1.62395	0.31425	5.16771	2.36976e-07	1.05054e-05	Ugt49B1
pre-mod(mdg4)-N	161.095	1.4923	0.289174	5.16054	2.46234e-07	1.08063e-05	pre-mod(mdg4)-N
pre-mod(mdg4)-O	161.095	1.4923	0.289174	5.16054	2.46234e-07	1.08063e-05	pre-mod(mdg4)-O
pre-mod(mdg4)-AA	161.095	1.4923	0.289174	5.16054	2.46234e-07	1.08063e-05	pre-mod(mdg4)-AA
spi	589.846	1.37858	0.267322	5.15702	2.50915e-07	1.0975e-05	spi
CG17032	2174.76	-1.65046	0.320233	-5.15394	2.55072e-07	1.11198e-05	CG17032
CG14439	999.819	-1.60107	0.311484	-5.14013	2.74553e-07	1.19294e-05	CG14439
wgn	716	0.998184	0.194305	5.1372	2.78864e-07	1.20767e-05	wgn
knk	474.144	-1.19789	0.233256	-5.13553	2.81349e-07	1.21443e-05	knk
pre-mod(mdg4)-E	127.664	1.36182	0.265787	5.12374	2.99535e-07	1.28048e-05	pre-mod(mdg4)-E
CG15531	402.062	-1.68114	0.328084	-5.12411	2.98946e-07	1.28048e-05	CG15531
CG10576	2043.99	-0.762581	0.148834	-5.12371	2.9958e-07	1.28048e-05	CG10576
CG13722	1904.06	-2.90782	0.567632	-5.12271	3.0117e-07	1.2831e-05	CG13722
CG32603	10652.5	-2.57301	0.502555	-5.11985	3.05783e-07	1.29854e-05	CG32603
Cpr65Ax2	857.81	-2.42223	0.473269	-5.11809	3.08653e-07	1.3065e-05	Cpr65Ax2
CG4294	566.89	1.00574	0.196658	5.11414	3.15171e-07	1.3298e-05	CG4294
CG8306	1388.05	-1.2376	0.242423	-5.10513	3.30561e-07	1.39026e-05	CG8306
Karl	197.587	-2.49919	0.489891	-5.10152	3.3694e-07	1.41256e-05	Karl
CG4842	90.4981	-2.80012	0.548996	-5.10044	3.38861e-07	1.41609e-05	CG4842
MICU3	741.969	0.914158	0.179397	5.09573	3.47407e-07	1.4472e-05	MICU3
Pgd	351.12	-1.76696	0.346948	-5.09287	3.52684e-07	1.46083e-05	Pgd
28SrRNA-Psi:CR40741	39589.5	-2.56842	0.504329	-5.09275	3.52905e-07	1.46083e-05	28SrRNA-Psi:CR40741
CG3164	1787.88	-1.07811	0.211768	-5.09098	3.56214e-07	1.46989e-05	CG3164
pirk	102.925	-2.15446	0.423265	-5.0901	3.57883e-07	1.47214e-05	pirk
Syt7	174.051	2.08507	0.409866	5.08721	3.6337e-07	1.49004e-05	Syt7
CG12607	3635.96	-1.79998	0.353999	-5.08471	3.68198e-07	1.50514e-05	CG12607
conv	578.644	-1.13323	0.223278	-5.07544	3.86597e-07	1.57544e-05	conv
CG6959	461.531	-1.17518	0.231672	-5.07258	3.92451e-07	1.59435e-05	CG6959
FER	1316.55	0.867196	0.170985	5.07177	3.94124e-07	1.5962e-05	FER
NFAT	2906.6	1.38211	0.272587	5.07033	3.97122e-07	1.6034e-05	NFAT
CG4666	385.596	-2.20553	0.435138	-5.06858	4.00784e-07	1.61322e-05	CG4666
CG8630	2363.9	-2.05339	0.405724	-5.06105	4.16946e-07	1.67314e-05	CG8630
CYLD	402.378	0.87806	0.173514	5.06047	4.18228e-07	1.67317e-05	CYLD
asRNA:CR44995	304.269	1.08793	0.215345	5.05202	4.37163e-07	1.7436e-05	asRNA:CR44995
mthl2	33.8918	-3.49315	0.692649	-5.04318	4.57863e-07	1.82063e-05	mthl2
hui	3077.85	-1.27845	0.253598	-5.04126	4.62471e-07	1.8334e-05	hui
IKKbeta	532.96	1.1113	0.220661	5.03622	4.74809e-07	1.87178e-05	IKKbeta
CG6310	106.077	-1.86435	0.370194	-5.03614	4.75006e-07	1.87178e-05	CG6310
Tpr2	1228.15	-0.902628	0.179252	-5.03552	4.7656e-07	1.87228e-05	Tpr2
Ugt37C1	317.471	-2.08393	0.413948	-5.03428	4.79638e-07	1.87875e-05	Ugt37C1
CG5390	796.851	-0.900338	0.178956	-5.03107	4.87742e-07	1.90481e-05	CG5390
tna	2653.23	1.32106	0.262799	5.0269	4.98476e-07	1.94095e-05	tna
bond	712.523	-1.93701	0.385913	-5.01929	5.18626e-07	2.01344e-05	bond
pot	2677.09	-0.838925	0.167246	-5.01611	5.27283e-07	2.041e-05	pot
firl	33.3067	-3.20637	0.639429	-5.01443	5.31914e-07	2.05288e-05	firl
CG4115	867.592	-1.10232	0.219891	-5.01302	5.3581e-07	2.06185e-05	CG4115
Ccp84Ab	135.855	1.72069	0.343595	5.00788	5.50315e-07	2.11147e-05	Ccp84Ab
CG10175	307.142	-1.69749	0.339773	-4.99597	5.85411e-07	2.23958e-05	CG10175
Octalpha2R	202.056	1.35067	0.27042	4.99471	5.89235e-07	2.24766e-05	Octalpha2R
asRNA:CR45969	318.787	-1.05618	0.211645	-4.99034	6.02737e-07	2.2925e-05	asRNA:CR45969
CG13337	50.2877	4.71343	0.944637	4.98967	6.04821e-07	2.29377e-05	CG13337
tfc	342.101	-2.22063	0.445382	-4.9859	6.16733e-07	2.33221e-05	tfc
Nepl20	90.1796	-3.1771	0.638406	-4.97661	6.47074e-07	2.43992e-05	Nepl20
Cyp4p3	1047.8	1.24616	0.250475	4.97516	6.51926e-07	2.44416e-05	Cyp4p3
He	142.861	-2.74118	0.550953	-4.97535	6.51314e-07	2.44416e-05	He
CG34120	1389.65	-0.73267	0.147296	-4.97413	6.55428e-07	2.45029e-05	CG34120
CG32694	2320.28	-1.43291	0.288146	-4.97285	6.59771e-07	2.45952e-05	CG32694
pre-mod(mdg4)-B	359.053	1.07743	0.217276	4.95883	7.09202e-07	2.62145e-05	pre-mod(mdg4)-B
pre-mod(mdg4)-H	359.053	1.07743	0.217276	4.95883	7.09202e-07	2.62145e-05	pre-mod(mdg4)-H
pre-mod(mdg4)-G	359.053	1.07743	0.217276	4.95883	7.09202e-07	2.62145e-05	pre-mod(mdg4)-G
Cyp4p1	489.188	1.33608	0.269533	4.95703	7.15787e-07	2.63836e-05	Cyp4p1
pre-mod(mdg4)-Z	207.946	1.18336	0.238786	4.95571	7.20661e-07	2.64149e-05	pre-mod(mdg4)-Z
pre-mod(mdg4)-T	207.946	1.18336	0.238786	4.95571	7.20661e-07	2.64149e-05	pre-mod(mdg4)-T
prd1	328.744	0.849598	0.171643	4.94979	7.42936e-07	2.71554e-05	prd1
CG1578	1216.24	0.987855	0.199751	4.94544	7.59718e-07	2.76917e-05	CG1578
asRNA:CR45167	239.357	1.19536	0.242061	4.93828	7.88147e-07	2.86484e-05	asRNA:CR45167
CG17026	123.787	-1.54264	0.31276	-4.93234	8.12487e-07	2.93704e-05	CG17026
CG11345	746.558	-1.68572	0.341741	-4.93274	8.10861e-07	2.93704e-05	CG11345
Swip-1	688.357	-1.14484	0.232213	-4.93012	8.21774e-07	2.96245e-05	Swip-1
emp	1715.71	-0.960289	0.195035	-4.92368	8.49323e-07	3.05337e-05	emp
Irp-1B	1225.85	-1.2845	0.261249	-4.91676	8.79873e-07	3.15456e-05	Irp-1B
obst-E	2745.73	-1.65533	0.337089	-4.91064	9.07778e-07	3.24574e-05	obst-E
Cpr11A	5403.61	-1.77437	0.361474	-4.90869	9.16868e-07	3.26933e-05	Cpr11A
CG3348	457.479	-1.63489	0.333192	-4.90676	9.2591e-07	3.29263e-05	CG3348
Tep1	38.7509	-2.86948	0.585301	-4.90256	9.45937e-07	3.34662e-05	Tep1
RhoGAP102A	3614.46	1.56307	0.31883	4.90251	9.46195e-07	3.34662e-05	RhoGAP102A
Mst84B	157.15	2.42894	0.496099	4.89607	9.77735e-07	3.44888e-05	Mst84B
Socs16D	775.594	0.756107	0.15473	4.88662	1.02584e-06	3.60887e-05	Socs16D
speck	598.356	1.55216	0.317882	4.88282	1.04581e-06	3.6693e-05	speck
CG14655	270.607	1.57087	0.321975	4.87886	1.06701e-06	3.72375e-05	CG14655
Cyp4ac3	828.166	1.68434	0.345221	4.879	1.06623e-06	3.72375e-05	Cyp4ac3
vir-1	4574.19	-1.73935	0.356682	-4.87648	1.07995e-06	3.75891e-05	vir-1
sano	372.834	-1.57214	0.322807	-4.87022	1.11473e-06	3.86971e-05	sano
PAN3	5340.8	1.05992	0.217734	4.86794	1.12766e-06	3.90425e-05	PAN3
mmy	1052.98	-1.12924	0.232246	-4.86223	1.16071e-06	4.0081e-05	mmy
asRNA:CR44114	366.56	-1.07963	0.222071	-4.86162	1.16427e-06	4.00987e-05	asRNA:CR44114
rt	244.473	-1.89767	0.390874	-4.85495	1.20419e-06	4.13647e-05	rt
CG11370	9208.93	-1.25864	0.259379	-4.85251	1.21911e-06	4.1768e-05	CG11370
CAH9	706.425	-1.12565	0.232268	-4.84636	1.25746e-06	4.29697e-05	CAH9
CG14419	1780.71	-1.50051	0.309833	-4.84298	1.27907e-06	4.35948e-05	CG14419
Cyp318a1	29.9518	-2.94128	0.60761	-4.84074	1.29355e-06	4.39739e-05	Cyp318a1
Pdk	4147.34	1.47656	0.305198	4.83805	1.31116e-06	4.4343e-05	Pdk
fat-spondin	178.964	-2.28032	0.471317	-4.8382	1.31023e-06	4.4343e-05	fat-spondin
scaf	4178.68	-1.48247	0.306629	-4.83472	1.33335e-06	4.49774e-05	scaf
Cpr49Ae	231.447	-2.57454	0.533243	-4.82808	1.37859e-06	4.63842e-05	Cpr49Ae
Syn	709.388	1.42432	0.295577	4.81878	1.44439e-06	4.84737e-05	Syn
CG13047	282.841	-3.20025	0.664328	-4.81727	1.45536e-06	4.87175e-05	CG13047
CG13895	255.099	1.24874	0.25925	4.81674	1.4592e-06	4.87216e-05	CG13895
Pka-C3	3199.2	1.04814	0.217696	4.81472	1.47406e-06	4.90931e-05	Pka-C3
CG41520	966.875	-1.36474	0.283524	-4.81348	1.48322e-06	4.92729e-05	CG41520
Cyp6a14	90.484	1.45114	0.302191	4.80207	1.57034e-06	5.20352e-05	Cyp6a14
sbr	836.817	0.78787	0.164177	4.7989	1.59542e-06	5.27334e-05	sbr
asRNA:CR44179	465.583	-1.01369	0.211574	-4.79119	1.65796e-06	5.46626e-05	asRNA:CR44179
Nop56	413.958	-1.07758	0.225071	-4.78775	1.68662e-06	5.54684e-05	Nop56
Cyp6g2	29.0617	3.24039	0.677527	4.78267	1.7298e-06	5.67462e-05	Cyp6g2
koi	904.219	-0.760671	0.159128	-4.78026	1.75068e-06	5.72877e-05	koi
Achl	231.806	-7.85292	1.6432	-4.77904	1.76131e-06	5.74394e-05	Achl
obst-B	1158.69	-1.08976	0.228045	-4.77873	1.76407e-06	5.74394e-05	obst-B
asRNA:CR46067	394.774	0.731954	0.153202	4.7777	1.77308e-06	5.75901e-05	asRNA:CR46067
bab2	548.782	-1.38493	0.289939	-4.77663	1.7826e-06	5.77562e-05	bab2
CG5112	463.998	-1.01719	0.212988	-4.7758	1.7899e-06	5.785e-05	CG5112
CG9593	64.2712	-2.01056	0.4211	-4.77454	1.80119e-06	5.80719e-05	CG9593
CG17739	50.4887	1.89183	0.396453	4.77188	1.82512e-06	5.86992e-05	CG17739
rdgA	1856.35	1.37801	0.289315	4.76301	1.90725e-06	6.11904e-05	rdgA
2SrRNA-Psi:CR45858	126.473	2.66969	0.56065	4.76177	1.91898e-06	6.12672e-05	2SrRNA-Psi:CR45858
CG42238	178.656	1.39468	0.292861	4.76225	1.91447e-06	6.12672e-05	CG42238
pre-rRNA:CR45856	25944.3	-2.80522	0.589217	-4.76093	1.92705e-06	6.13756e-05	pre-rRNA:CR45856
CG14322	714.695	1.0375	0.218193	4.75494	1.98502e-06	6.30687e-05	CG14322
CG9459	29.4201	-3.96865	0.836102	-4.74661	2.06852e-06	6.5563e-05	CG9459
CG31115	20.2869	2.88701	0.608367	4.7455	2.07991e-06	6.57651e-05	CG31115
CG33465	61.4525	-2.7349	0.576653	-4.74271	2.10874e-06	6.65166e-05	CG33465
CG10467	255.416	-1.69562	0.357692	-4.74046	2.13239e-06	6.71011e-05	CG10467
Ipk1	178.842	1.16693	0.246666	4.73083	2.23608e-06	7.01957e-05	Ipk1
CG12206	886.074	-1.57336	0.332716	-4.72885	2.25791e-06	7.07119e-05	CG12206
Rat1	253.781	-1.14587	0.242514	-4.72495	2.30177e-06	7.19138e-05	Rat1
Ugt50B3	216.638	-1.80374	0.382077	-4.72088	2.34829e-06	7.31931e-05	Ugt50B3
CG8534	179.784	-2.79649	0.592897	-4.71665	2.39764e-06	7.43777e-05	CG8534
CG16758	901.693	-2.2098	0.468508	-4.71667	2.39738e-06	7.43777e-05	CG16758
Ptp52F	62.6565	-2.78027	0.589648	-4.71514	2.41546e-06	7.4754e-05	Ptp52F
CkIIalpha-i3	172.63	1.52128	0.322803	4.71271	2.44449e-06	7.54743e-05	CkIIalpha-i3
Ptpmeg2	1398.74	0.866445	0.184196	4.70394	2.55191e-06	7.86061e-05	Ptpmeg2
CG7781	238.907	1.53866	0.327617	4.69651	2.64639e-06	8.13253e-05	CG7781
DOR	9784.9	1.45736	0.310642	4.69144	2.71289e-06	8.30032e-05	DOR
nclb	263.821	-0.963497	0.205376	-4.69138	2.71364e-06	8.30032e-05	nclb
h	2703.09	-1.15424	0.246123	-4.68969	2.73614e-06	8.34969e-05	h
St1	29.3566	-3.11249	0.664488	-4.68403	2.81284e-06	8.56382e-05	St1
eIF4E1	2272.68	-0.748855	0.159905	-4.68313	2.82529e-06	8.5818e-05	eIF4E1
CG18179	17.0844	4.25337	0.909009	4.67912	2.88102e-06	8.73089e-05	CG18179
Rchy1	446.589	-1.22582	0.262097	-4.67698	2.91124e-06	8.80215e-05	Rchy1
regucalcin	1144.16	-1.51698	0.324554	-4.67403	2.95342e-06	8.90914e-05	regucalcin
slif	364.843	-2.57954	0.552466	-4.66914	3.02468e-06	9.10319e-05	slif
Cyp6v1	246.905	0.966888	0.207136	4.66789	3.04308e-06	9.1376e-05	Cyp6v1
CG40198	4965.39	-1.61591	0.346505	-4.66344	3.10968e-06	9.31626e-05	CG40198
mnd	313.431	-1.7064	0.366561	-4.65516	3.23732e-06	9.67658e-05	mnd
Hsp70Ab	224.74	-3.80033	0.816983	-4.65166	3.29267e-06	9.81963e-05	Hsp70Ab
CG33521	6157.95	1.45888	0.313891	4.64773	3.35612e-06	9.98617e-05	CG33521
Pkc98E	1611.46	1.0079	0.216979	4.64516	3.39816e-06	0.000100884	Pkc98E
CG7675	1066.78	-1.33712	0.28871	-4.63135	3.63286e-06	0.000107608	CG7675
Naa80	653.409	1.66863	0.360573	4.62772	3.69713e-06	0.000109254	Naa80
Cpr65Av	323.165	-2.265	0.48949	-4.62727	3.70509e-06	0.000109254	Cpr65Av
GstO3	769.217	-1.15919	0.250889	-4.62033	3.83133e-06	0.000112723	GstO3
Ddc	1085.93	-2.28254	0.494243	-4.61826	3.86969e-06	0.000113597	Ddc
26-29-p	956.462	-1.02238	0.221414	-4.61752	3.88358e-06	0.000113751	26-29-p
CG32121	166.478	1.46056	0.316741	4.61123	4.00292e-06	0.000116985	CG32121
asRNA:CR45612	221.292	1.23358	0.267792	4.6065	4.09511e-06	0.000119413	asRNA:CR45612
Gadd45	570.288	-1.41901	0.308136	-4.60514	4.12188e-06	0.000119927	Gadd45
CG42329	405.703	-2.8723	0.624332	-4.60059	4.21289e-06	0.000122304	CG42329
CG7299	11271.8	-0.971136	0.211116	-4.60001	4.22463e-06	0.000122374	CG7299
CG31221	772.296	1.7506	0.380871	4.5963	4.30065e-06	0.000124302	CG31221
Gnpnat	693.023	-1.35052	0.294133	-4.59152	4.40027e-06	0.000126347	Gnpnat
FASN1	4882.6	-2.56712	0.559063	-4.59183	4.39373e-06	0.000126347	FASN1
me31B	865.451	-0.849719	0.185043	-4.592	4.39017e-06	0.000126347	me31B
BomBc3	102.711	2.44015	0.531887	4.58773	4.48088e-06	0.00012838	BomBc3
CG5087	317.306	0.991084	0.216216	4.58376	4.56692e-06	0.00013056	CG5087
CG31601	41.7882	2.77995	0.607378	4.57698	4.71747e-06	0.000134571	CG31601
rgr	334.939	1.35922	0.297207	4.57329	4.80122e-06	0.000136663	rgr
CG7059	60.7744	3.31911	0.726007	4.57174	4.83697e-06	0.000137382	CG7059
CG5033	211.595	-1.14206	0.250219	-4.56422	5.01363e-06	0.000141793	CG5033
gol	345.533	1.32536	0.29038	4.56421	5.01386e-06	0.000141793	gol
galectin	1237.72	1.15838	0.254183	4.55728	5.18214e-06	0.000146237	galectin
CG10512	1361.2	1.12055	0.246064	4.55389	5.26628e-06	0.000147974	CG10512
Hsc70Cb	2142.19	-0.970989	0.213215	-4.55403	5.2627e-06	0.000147974	Hsc70Cb
lncRNA:roX2	142.606	2.17582	0.47914	4.54109	5.59632e-06	0.000156912	lncRNA:roX2
pan	2069.45	1.35476	0.298378	4.5404	5.61471e-06	0.000157092	pan
CG5867	226.323	-2.48344	0.547222	-4.53827	5.67168e-06	0.000158348	CG5867
Usp12-46	302.167	-1.25298	0.27616	-4.53715	5.70183e-06	0.000158516	Usp12-46
sncRNA:204	92.2578	-1.50472	0.331637	-4.53724	5.69945e-06	0.000158516	sncRNA:204
Setx	265.282	1.00096	0.220642	4.53657	5.71777e-06	0.000158623	Setx
JYalpha	21.996	4.00397	0.882945	4.53479	5.76618e-06	0.000159628	JYalpha
CG32846	35.8523	3.27242	0.723328	4.52411	6.06508e-06	0.000167549	CG32846
RhoGAP18B	745.024	0.819036	0.181117	4.52214	6.1217e-06	0.000168758	RhoGAP18B
CG1812	371.957	1.28425	0.2841	4.52042	6.17185e-06	0.000169784	CG1812
CG7900	323.84	-1.09482	0.242452	-4.51561	6.31334e-06	0.000173313	CG7900
CG33229	2776.1	0.989523	0.219172	4.51482	6.33711e-06	0.000173602	CG33229
CG3505	183.984	-1.49699	0.331732	-4.51267	6.40167e-06	0.000175006	CG3505
ZnT35C	43.3474	2.40557	0.534491	4.50068	6.77364e-06	0.000184789	ZnT35C
nudC	236.785	-0.953197	0.211854	-4.49931	6.81739e-06	0.000185597	nudC
CG31195	875.758	-0.932292	0.207282	-4.4977	6.8692e-06	0.00018662	CG31195
CG17562	130.718	-2.95197	0.65675	-4.49483	6.96271e-06	0.00018877	CG17562
Lsd-2	3960.97	1.0023	0.223175	4.49109	7.08592e-06	0.000191714	Lsd-2
CG34284	104.528	1.96363	0.437484	4.48847	7.17374e-06	0.000193691	CG34284
Gbeta13F	5287.64	0.818688	0.182501	4.48593	7.2595e-06	0.000195604	Gbeta13F
TwdlL	770.597	-3.08378	0.689212	-4.47436	7.66404e-06	0.000206081	TwdlL
Rh7	14.9005	5.08266	1.13669	4.47145	7.76896e-06	0.000208377	Rh7
CG42502	4098.43	-1.71382	0.383346	-4.47068	7.79708e-06	0.000208377	CG42502
CG10570	4098.43	-1.71382	0.383346	-4.47068	7.79708e-06	0.000208377	CG10570
Tsf2	619.027	-0.767476	0.171713	-4.46952	7.83944e-06	0.000209084	Tsf2
HDAC4	1464.55	0.930844	0.208415	4.4663	7.95823e-06	0.000211821	HDAC4
Ent2	375.937	-0.907993	0.203484	-4.46223	8.11108e-06	0.000215453	Ent2
CG15412	207.576	1.84536	0.413959	4.45784	8.27889e-06	0.000219466	CG15412
CG13982	108.211	1.49613	0.335756	4.45601	8.34982e-06	0.0002209	CG13982
sage	48.1738	3.91982	0.880329	4.45268	8.48053e-06	0.000223906	sage
CG15747	142.508	1.05046	0.236293	4.44558	8.76532e-06	0.000230961	CG15747
Tsp42Ek	412.628	-1.5183	0.341897	-4.4408	8.96269e-06	0.000235688	Tsp42Ek
Eogt	458.409	-0.918542	0.206936	-4.43878	9.04698e-06	0.000237429	Eogt
CG15186	172.291	1.37715	0.310418	4.43643	9.14641e-06	0.000239559	CG15186
Nep1	487.689	-1.06733	0.240861	-4.43133	9.36554e-06	0.00024481	Nep1
asRNA:CR44137	179.015	-1.24344	0.280775	-4.42862	9.4838e-06	0.000247408	asRNA:CR44137
Sodh-2	2560.87	1.19438	0.269818	4.4266	9.57322e-06	0.000249106	Sodh-2
l(2)09851	202.699	-0.953955	0.21552	-4.42629	9.58686e-06	0.000249106	l(2)09851
Swt1	301.237	1.26239	0.285253	4.42552	9.62104e-06	0.000249501	Swt1
pre-mod(mdg4)-J	297.282	1.0563	0.239066	4.41843	9.94183e-06	0.000254798	pre-mod(mdg4)-J
pre-mod(mdg4)-K	297.282	1.0563	0.239066	4.41843	9.94183e-06	0.000254798	pre-mod(mdg4)-K
pre-mod(mdg4)-P	297.282	1.0563	0.239066	4.41843	9.94183e-06	0.000254798	pre-mod(mdg4)-P
pre-mod(mdg4)-L	297.282	1.0563	0.239066	4.41843	9.94183e-06	0.000254798	pre-mod(mdg4)-L
pre-mod(mdg4)-I	297.282	1.0563	0.239066	4.41843	9.94183e-06	0.000254798	pre-mod(mdg4)-I
mthl8	206.531	1.50144	0.339788	4.41875	9.92712e-06	0.000254798	mthl8
Hr38	431.194	-2.01466	0.456098	-4.41717	1.00001e-05	0.000255792	Hr38
Poxm	118.076	1.21052	0.274718	4.4064	1.05102e-05	0.000268316	Poxm
lectin-22C	2149.75	-2.15966	0.491176	-4.39693	1.09794e-05	0.000279751	lectin-22C
Kcmf1	730.101	0.703881	0.16015	4.39513	1.10706e-05	0.000281527	Kcmf1
CG33110	473.192	-1.46703	0.334828	-4.38143	1.17903e-05	0.000298672	CG33110
Pex10	195.408	-0.959715	0.219037	-4.38151	1.17859e-05	0.000298672	Pex10
NADK	462.867	-0.803529	0.183476	-4.37947	1.18968e-05	0.000300791	NADK
eas	703.266	0.747547	0.170978	4.37217	1.23015e-05	0.000310424	eas
Bbd	1254.51	1.53223	0.350686	4.36925	1.24674e-05	0.000313471	Bbd
CG14626	31.4832	2.9602	0.677516	4.3692	1.247e-05	0.000313471	CG14626
CG3036	1319.08	-0.961798	0.220184	-4.36816	1.25298e-05	0.000314372	CG3036
asRNA:CR46038	359.095	-1.12616	0.257844	-4.36761	1.25614e-05	0.000314562	asRNA:CR46038
CG5114	124.848	-1.27971	0.293144	-4.36546	1.26858e-05	0.000317072	CG5114
CG17974	204.282	-1.62496	0.372353	-4.36402	1.27691e-05	0.000318549	CG17974
CG8611	106.997	-1.69619	0.388812	-4.36249	1.2859e-05	0.000320182	CG8611
Cubn2	119.522	-2.62656	0.602229	-4.36139	1.2924e-05	0.000321125	Cubn2
CG10598	300.305	-2.45119	0.562067	-4.36102	1.29458e-05	0.000321125	CG10598
Lcp9	2200.68	-1.5699	0.36047	-4.35513	1.32986e-05	0.000329253	Lcp9
CG33293	68.2755	2.78896	0.640895	4.35166	1.35112e-05	0.000332635	CG33293
qkr58E-1	367.856	1.03189	0.237126	4.35167	1.35104e-05	0.000332635	qkr58E-1
CG6398	659.357	-0.751475	0.172664	-4.35225	1.34745e-05	0.000332635	CG6398
dnr1	1210.66	1.13908	0.26193	4.34882	1.36874e-05	0.000336341	dnr1
asRNA:CR44035	150.794	-2.64679	0.608847	-4.34722	1.37875e-05	0.000338046	asRNA:CR44035
CG8399	1094.49	-0.835972	0.192315	-4.34689	1.38083e-05	0.000338046	CG8399
mir-967	98.7036	1.36113	0.313292	4.34459	1.39537e-05	0.000340969	mir-967
salto	87.8151	3.50241	0.80732	4.33831	1.43583e-05	0.000350203	salto
CG4914	128.548	-3.94673	0.910242	-4.33592	1.45154e-05	0.000353378	CG4914
CG14618	160.509	1.52352	0.351909	4.32932	1.49572e-05	0.00036346	CG14618
CG17928	201.611	-0.97649	0.225779	-4.32498	1.52545e-05	0.00037	CG17928
Arc1	8475.13	0.983941	0.227534	4.32437	1.52968e-05	0.000370339	Arc1
asRNA:CR45195	2207.66	1.15523	0.267275	4.32227	1.54435e-05	0.000372519	asRNA:CR45195
CG17883	690.656	1.08956	0.252071	4.32242	1.5433e-05	0.000372519	CG17883
lncRNA:CR45324	169.918	-1.52048	0.351918	-4.32054	1.55649e-05	0.000374757	lncRNA:CR45324
CG15547	292.343	1.04201	0.241301	4.31829	1.57243e-05	0.000377901	CG15547
Fatp2	215.553	-1.36352	0.316078	-4.31389	1.6041e-05	0.000384808	Fatp2
betaTub56D	14646.3	-0.752149	0.174606	-4.30769	1.6497e-05	0.000395026	betaTub56D
ZC3H3	110.243	1.36283	0.316513	4.30577	1.66403e-05	0.000397732	ZC3H3
CG18609	440.831	-1.88631	0.438413	-4.3026	1.68804e-05	0.000402736	CG18609
CG42524	191.988	1.38363	0.321636	4.30186	1.69367e-05	0.000403345	CG42524
pre-mod(mdg4)-W	282.601	0.983364	0.228717	4.29948	1.71199e-05	0.000406969	pre-mod(mdg4)-W
CG7497	130.526	-1.892	0.440296	-4.29711	1.73043e-05	0.000410609	CG7497
asRNA:CR45479	77.5259	2.3381	0.544866	4.29114	1.77756e-05	0.000421032	asRNA:CR45479
Act42A	1124.67	-1.4777	0.344736	-4.28646	1.81543e-05	0.000429227	Act42A
Slc45-1	1256.57	1.02857	0.240089	4.28412	1.8346e-05	0.00043298	Slc45-1
CG10383	855.497	1.10834	0.258854	4.28174	1.85437e-05	0.000436858	CG10383
CG40486	358.705	-2.28548	0.534565	-4.2754	1.90791e-05	0.000448666	CG40486
Nha2	652.202	-1.14942	0.269104	-4.2713	1.94336e-05	0.000456186	Nha2
CG31550	595.435	0.838991	0.196504	4.26959	1.95833e-05	0.000458879	CG31550
CG31337	46.5062	-3.23956	0.759888	-4.2632	2.01517e-05	0.000471355	CG31337
HDAC11	149.763	1.05259	0.247014	4.26125	2.03285e-05	0.000474645	HDAC11
CG1965	339.968	0.831138	0.195069	4.26073	2.03756e-05	0.0004749	CG1965
Tg	764.307	-0.994437	0.233489	-4.25903	2.05311e-05	0.000477677	Tg
ex	765.647	-1.36024	0.319604	-4.25602	2.08097e-05	0.000483301	ex
SecCl	90.1078	2.19003	0.514851	4.25372	2.10249e-05	0.000487436	SecCl
pre-mod(mdg4)-V	281.428	0.97372	0.228956	4.25287	2.11046e-05	0.00048756	pre-mod(mdg4)-V
pre-mod(mdg4)-U	281.428	0.97372	0.228956	4.25287	2.11046e-05	0.00048756	pre-mod(mdg4)-U
wtrw	421.01	1.17451	0.276397	4.24933	2.14407e-05	0.000494456	wtrw
Kah	202.676	1.08907	0.256478	4.24626	2.17366e-05	0.000499916	Kah
LanB1	3138.56	-0.938869	0.221114	-4.24609	2.17537e-05	0.000499916	LanB1
Iris	111.073	-2.17538	0.51241	-4.24539	2.18218e-05	0.000500604	Iris
ATPCL	1613.9	-1.61614	0.380885	-4.24311	2.20444e-05	0.000504829	ATPCL
cass	1528.24	0.788773	0.186061	4.23932	2.24201e-05	0.000512537	cass
CG10341	148.046	-1.14063	0.269214	-4.2369	2.26629e-05	0.000517186	CG10341
AOX2	289.081	-1.46843	0.346658	-4.23597	2.27565e-05	0.000518423	AOX2
Sgsh	281.276	-1.24093	0.293263	-4.23147	2.3217e-05	0.000527996	Sgsh
CG3198	738.155	0.918336	0.21707	4.23059	2.33077e-05	0.000529142	CG3198
Met	490.154	1.09624	0.259819	4.21925	2.45112e-05	0.000555503	Met
Ppt2	239.879	1.337	0.317143	4.21575	2.48948e-05	0.000563224	Ppt2
CG10211	2702.37	-1.82545	0.433212	-4.21376	2.51152e-05	0.000567231	CG10211
CaMKI	1926.08	0.958094	0.227454	4.21226	2.52833e-05	0.000570047	CaMKI
CG8679	73.8169	1.59806	0.379492	4.21106	2.54173e-05	0.000572085	CG8679
lawc	582.589	1.00036	0.237687	4.20872	2.56817e-05	0.000577048	lawc
CR46406	25.9103	2.80545	0.667082	4.20555	2.6045e-05	0.000583275	CR46406
lncRNA:CR44779	304.868	1.56558	0.372268	4.20552	2.60478e-05	0.000583275	lncRNA:CR44779
CG15155	212.883	2.65722	0.632045	4.20416	2.62057e-05	0.000585812	CG15155
CG9747	542.768	1.9843	0.472596	4.19872	2.68426e-05	0.000597419	CG9747
CG10483	469.457	0.90858	0.216364	4.1993	2.67738e-05	0.000597419	CG10483
Mocs1	166.347	-1.13986	0.271513	-4.19818	2.69071e-05	0.000597419	Mocs1
Mur18B	3195.98	1.99244	0.474593	4.19821	2.69033e-05	0.000597419	Mur18B
Prip	176.462	-2.09027	0.498746	-4.19105	2.77662e-05	0.000615454	Prip
CG46429	1270.16	0.753309	0.179917	4.18697	2.82698e-05	0.000625559	CG46429
CG31468	11.3907	7.35179	1.75811	4.18164	2.89418e-05	0.00063935	CG31468
Abca3	296.164	1.30033	0.311064	4.18025	2.91195e-05	0.000642195	Abca3
snoRNA:Psi28S-3571	17.9487	3.37884	0.808728	4.17797	2.94129e-05	0.000647576	snoRNA:Psi28S-3571
Dredd	288.101	0.913866	0.218932	4.17419	2.99046e-05	0.000657299	Dredd
CG12576	1941.06	1.07576	0.258422	4.1628	3.14366e-05	0.000687728	CG12576
La	537.764	-0.792677	0.190422	-4.16273	3.14462e-05	0.000687728	La
Ccdc85	193.541	-1.1052	0.265462	-4.1633	3.13679e-05	0.000687728	Ccdc85
asRNA:CR45909	38.739	-2.40438	0.577664	-4.16225	3.15124e-05	0.00068803	asRNA:CR45909
nAChRbeta2	60.893	1.79307	0.431313	4.15725	3.22102e-05	0.000700932	nAChRbeta2
Lectin-galC1	986.842	-2.03496	0.48947	-4.15748	3.21776e-05	0.000700932	Lectin-galC1
Ptp99A	848.018	1.07167	0.257961	4.15437	3.26186e-05	0.000706307	Ptp99A
CG42808	1083.98	-1.33826	0.322117	-4.15459	3.25868e-05	0.000706307	CG42808
asRNA:CR43866	97.0284	-2.38002	0.572795	-4.1551	3.25139e-05	0.000706307	asRNA:CR43866
CG8839	753.945	-0.585491	0.140952	-4.15385	3.26932e-05	0.000706755	CG8839
CG32772	325.363	1.13426	0.273218	4.15149	3.30313e-05	0.000712888	CG32772
jet	88.4139	1.71173	0.412772	4.14692	3.36982e-05	0.000726088	jet
CG31974	144.84	-1.67248	0.403516	-4.14476	3.40172e-05	0.000731761	CG31974
su(w[a])	1632.41	1.06711	0.257565	4.14307	3.4268e-05	0.000735949	su(w[a])
Sesn	1276.1	0.755168	0.182306	4.1423	3.43835e-05	0.000737222	Sesn
CG31121	478.362	-1.17467	0.283923	-4.13727	3.51455e-05	0.000752331	CG31121
CG6770	16857	1.51672	0.366694	4.13619	3.53127e-05	0.000754679	CG6770
Rbfox1	2136.97	1.04543	0.25279	4.13557	3.54069e-05	0.000755463	Rbfox1
mod(mdg4)	1252.88	0.639952	0.154792	4.13427	3.56082e-05	0.000758301	mod(mdg4)
Lcp65Af	2971.56	-3.58095	0.866226	-4.13397	3.56555e-05	0.000758301	Lcp65Af
CG7966	311.092	-1.08651	0.262905	-4.13273	3.58476e-05	0.000761153	CG7966
Cpr47Ec	7958.76	-1.36646	0.3308	-4.13078	3.61529e-05	0.000766395	Cpr47Ec
asRNA:CR42860	1103.29	1.33647	0.323667	4.12916	3.64095e-05	0.000770589	asRNA:CR42860
Lcp65Ae	584.86	-2.41801	0.58627	-4.1244	3.71707e-05	0.000785432	Lcp65Ae
myd	259.876	-0.954381	0.231466	-4.1232	3.73642e-05	0.000788253	myd
nAChRalpha7	147.03	1.84738	0.449646	4.10852	3.98204e-05	0.00083872	nAChRalpha7
CG4927	42.617	-2.15423	0.524616	-4.10629	4.02064e-05	0.000845493	CG4927
bnl	554.455	1.4515	0.35364	4.10446	4.05266e-05	0.000850863	bnl
CG8860	245.435	-0.982313	0.239417	-4.10293	4.07951e-05	0.000854427	CG8860
fzy	123.941	-1.24757	0.304082	-4.10275	4.08265e-05	0.000854427	fzy
Syt1	647.412	1.29786	0.316577	4.09968	4.13717e-05	0.000864459	Syt1
aralar1	1253.68	-0.894852	0.218467	-4.09606	4.20249e-05	0.00087198	aralar1
Nelf-E	788.887	1.17602	0.287109	4.09607	4.2022e-05	0.00087198	Nelf-E
asRNA:CR45264	244.521	-0.954452	0.233018	-4.09604	4.20276e-05	0.00087198	asRNA:CR45264
CG4250	33.394	-2.55637	0.624139	-4.09584	4.2064e-05	0.00087198	CG4250
CG4896	349.506	0.76409	0.186489	4.09725	4.18094e-05	0.00087198	CG4896
CG10939	1158.01	-0.89967	0.219768	-4.09373	4.24496e-05	0.000878585	CG10939
CG8939	296.018	-1.11039	0.271469	-4.09031	4.30799e-05	0.000890228	CG8939
Su(var)3-9	280.278	-0.742334	0.181558	-4.0887	4.33802e-05	0.000892343	Su(var)3-9
E(spl)m2-BFM	19.4441	-3.6035	0.881202	-4.0893	4.32674e-05	0.000892343	E(spl)m2-BFM
Hsp70Bb	495.491	-4.33775	1.06092	-4.08866	4.33863e-05	0.000892343	Hsp70Bb
CG13067	3332.23	-1.66558	0.40751	-4.08722	4.36568e-05	0.000896502	CG13067
Smyd4-4	220.106	-0.786814	0.192811	-4.08075	4.4891e-05	0.000920406	Smyd4-4
asRNA:CR45396	448.68	-1.65652	0.406221	-4.07787	4.54505e-05	0.000928949	asRNA:CR45396
CG34184	8.25632	-6.38611	1.5661	-4.07771	4.54812e-05	0.000928949	CG34184
Pu	663.007	-1.85607	0.455196	-4.07751	4.55201e-05	0.000928949	Pu
CG15695	46.8779	-2.70837	0.664352	-4.07672	4.56762e-05	0.000930689	CG15695
asRNA:CR45257	20.3136	-3.28952	0.807018	-4.07614	4.57886e-05	0.000931531	asRNA:CR45257
asRNA:CR45525	121.831	-1.51757	0.372355	-4.07559	4.58973e-05	0.000932298	asRNA:CR45525
CG2767	1964.03	-0.863055	0.211901	-4.07291	4.64286e-05	0.000941632	CG2767
rdgB	651.771	1.28025	0.314586	4.06962	4.70889e-05	0.00095355	rdgB
CG3842	147.492	0.930541	0.228932	4.06471	4.80926e-05	0.000972375	CG3842
sona	895.702	-1.37573	0.338494	-4.06429	4.81797e-05	0.000972638	sona
CG14629	183.554	-1.78977	0.440817	-4.06012	4.90474e-05	0.000988633	CG14629
CG10026	142.505	-1.09239	0.269111	-4.05926	4.92294e-05	0.000990779	CG10026
CG1299	921.515	-0.803707	0.19816	-4.05585	4.99516e-05	0.00100377	CG1299
Pur-alpha	1362.72	0.982822	0.242355	4.05529	5.00717e-05	0.00100465	Pur-alpha
ApepP	451.143	-0.859776	0.21204	-4.05479	5.01804e-05	0.00100529	ApepP
Jra	511.589	-0.918213	0.226624	-4.05171	5.08449e-05	0.00101705	Jra
CG13728	14.474	-5.19577	1.28278	-4.05039	5.11323e-05	0.00102125	CG13728
Had1	619.976	-1.01583	0.250839	-4.04972	5.1279e-05	0.00102262	Had1
CG4596	52.8883	1.66788	0.412042	4.04783	5.1694e-05	0.00102927	CG4596
CG9287	57.4943	-3.86665	0.955321	-4.04749	5.17695e-05	0.00102927	CG9287
CG3534	304.528	-0.938516	0.231909	-4.04692	5.18967e-05	0.00103024	CG3534
kat80	262.369	-0.83986	0.207576	-4.04604	5.20924e-05	0.00103256	kat80
ben	1979.55	0.843074	0.208696	4.03973	5.35126e-05	0.00105911	ben
CG31345	94.5815	-1.86295	0.461273	-4.03871	5.37451e-05	0.00106211	CG31345
CG43402	18.5262	2.65539	0.657619	4.03788	5.39372e-05	0.00106431	CG43402
Cyp6t3	32.1834	2.43503	0.603156	4.03715	5.41056e-05	0.00106603	Cyp6t3
Cyp6d4	140.222	-1.09232	0.270702	-4.03515	5.45679e-05	0.00107249	Cyp6d4
CG32137	1146.76	-0.61461	0.152319	-4.03502	5.45973e-05	0.00107249	CG32137
wrm2	470.121	-1.00002	0.248092	-4.03086	5.55733e-05	0.00108841	wrm2
wrm1	470.121	-1.00002	0.248092	-4.03086	5.55733e-05	0.00108841	wrm1
asRNA:CR45485	619.998	-1.01315	0.251451	-4.02921	5.59637e-05	0.00109442	asRNA:CR45485
CR45033	59.0426	1.48477	0.368699	4.02705	5.64822e-05	0.00110292	CR45033
pre-mod(mdg4)-X	253.767	0.993744	0.246946	4.02414	5.7185e-05	0.00111498	pre-mod(mdg4)-X
CG8563	505.275	-1.18596	0.294825	-4.02259	5.75615e-05	0.00112017	CG8563
DnaJ-1	2058.24	-2.3477	0.583664	-4.02234	5.76218e-05	0.00112017	DnaJ-1
hiw	833.741	2.17594	0.541299	4.01985	5.82344e-05	0.0011304	hiw
Echs1	2004.12	-0.875652	0.217902	-4.01856	5.85554e-05	0.00113495	Echs1
pit	211.883	-0.890653	0.221946	-4.01292	5.99723e-05	0.0011607	pit
asRNA:CR45891	45.2063	-1.89739	0.473078	-4.01073	6.05311e-05	0.00116979	asRNA:CR45891
AdSL	212.547	-0.885239	0.220824	-4.0088	6.10272e-05	0.00117765	AdSL
Cad99C	1236.68	-1.31694	0.328772	-4.00563	6.18513e-05	0.00119179	Cad99C
CG3631	150.343	1.32839	0.331933	4.00198	6.28148e-05	0.00120859	CG3631
Cyp4d14	62.3251	2.185	0.546072	4.00131	6.29938e-05	0.00121026	Cyp4d14
Idgf3	2285.51	0.670691	0.167638	4.00082	6.31236e-05	0.00121098	Idgf3
CG31675	227.074	1.56818	0.392096	3.99948	6.34819e-05	0.00121607	CG31675
CG3847	367.768	-0.819611	0.205173	-3.99473	6.47684e-05	0.00123891	CG3847
yellow-e	479.971	-1.12511	0.281782	-3.99285	6.5284e-05	0.00124582	yellow-e
Nnp-1	260.065	-0.969023	0.242698	-3.99272	6.53196e-05	0.00124582	Nnp-1
CG6426	949.064	-1.14689	0.287535	-3.98871	6.64334e-05	0.00126522	CG6426
CG42327	776.866	-1.07409	0.269474	-3.98589	6.72268e-05	0.00127848	CG42327
CG11349	412.562	-1.85403	0.465652	-3.98157	6.84605e-05	0.00130006	CG11349
mir-2a-2	17.1788	2.60761	0.656038	3.97478	7.04432e-05	0.00133577	mir-2a-2
CG2217	76.8815	2.09789	0.528108	3.97247	7.11315e-05	0.00134494	CG2217
CG42740	76.8815	2.09789	0.528108	3.97247	7.11315e-05	0.00134494	CG42740
asRNA:CR44416	59.7915	-1.66125	0.418896	-3.96579	7.31527e-05	0.00138117	asRNA:CR44416
RabX4	138.226	1.41664	0.357312	3.9647	7.34882e-05	0.00138551	RabX4
asRNA:CR44062	112.997	-2.02813	0.511676	-3.96371	7.37946e-05	0.00138929	asRNA:CR44062
Mipp2	334.624	0.725079	0.182962	3.963	7.40131e-05	0.0013914	Mipp2
SmydA-4	202.746	1.11207	0.280778	3.96069	7.47348e-05	0.00140296	SmydA-4
wun2	56.9904	-1.45972	0.368905	-3.95689	7.59327e-05	0.00142341	wun2
CG14183	44.8765	1.80707	0.456982	3.95435	7.67433e-05	0.00143566	CG14183
CG5171	1547.36	-2.01705	0.510108	-3.95416	7.68047e-05	0.00143566	CG5171
CG11905	310.361	-3.32989	0.842382	-3.95295	7.71926e-05	0.00144086	CG11905
betaggt-I	251.825	0.984888	0.249253	3.95136	7.77073e-05	0.0014484	betaggt-I
fuss	211.138	1.59531	0.403791	3.95084	7.78772e-05	0.00144951	fuss
Ace	487.721	1.36254	0.34507	3.94858	7.86173e-05	0.00146121	Ace
CG6839	26.1311	-6.25868	1.58644	-3.94511	7.9764e-05	0.00148043	CG6839
GNBP3	570.2	-0.778224	0.197332	-3.94372	8.02272e-05	0.00148692	GNBP3
pnr	32.1738	-2.11525	0.536646	-3.94161	8.09361e-05	0.00149795	pnr
CG12325	127.203	-1.19173	0.302757	-3.93627	8.27586e-05	0.00152952	CG12325
CG17109	56.4987	-2.56785	0.653014	-3.93231	8.41348e-05	0.00155277	CG17109
Tudor-SN	2819.09	-1.33561	0.339714	-3.93158	8.43881e-05	0.00155516	Tudor-SN
eEF1delta	1117	-0.639851	0.16276	-3.93126	8.45017e-05	0.00155516	eEF1delta
sncRNA:419	409.023	-0.9864	0.250988	-3.93007	8.4922e-05	0.00156065	sncRNA:419
Galphai	462.762	-0.781702	0.19892	-3.92974	8.50379e-05	0.00156065	Galphai
BomS2	75.6804	1.32242	0.336788	3.92657	8.61658e-05	0.00157914	BomS2
ste24a	273.887	-0.86501	0.220319	-3.92618	8.63068e-05	0.00157952	ste24a
Nlp	1137.24	-0.70904	0.180626	-3.92546	8.65654e-05	0.00158205	Nlp
TRAM	987.565	-1.33363	0.339898	-3.92361	8.72301e-05	0.00159198	TRAM
lncRNA:CR43461	14.5494	3.21075	0.818466	3.92288	8.74955e-05	0.00159461	lncRNA:CR43461
CG14830	1213.75	-1.01216	0.258503	-3.91546	9.02308e-05	0.00164218	CG14830
Cyp6a21	166.466	-1.44961	0.370644	-3.91104	9.1899e-05	0.00167022	Cyp6a21
CG4757	251.981	-1.85226	0.473951	-3.90812	9.30171e-05	0.0016882	CG4757
Cpr49Ad	26.8178	-5.31105	1.35946	-3.90674	9.35497e-05	0.00169552	Cpr49Ad
Ets21C	209.984	-1.71028	0.437867	-3.90593	9.3865e-05	0.00169889	Ets21C
Gp150	8691.87	-0.65647	0.168109	-3.90503	9.42148e-05	0.00170287	Gp150
CG30281	22.229	-3.39866	0.870978	-3.90212	9.53524e-05	0.00172106	CG30281
CG14695	84.8452	1.60312	0.411261	3.89806	9.69665e-05	0.0017454	CG14695
Art1	299.248	-0.992898	0.254711	-3.89814	9.69361e-05	0.0017454	Art1
Cyp4aa1	757.422	1.28401	0.329565	3.89608	9.77614e-05	0.00175729	Cyp4aa1
CG11247	322.929	0.917228	0.235499	3.89483	9.82668e-05	0.00176396	CG11247
CCT3	1127.74	-0.766835	0.19713	-3.88999	0.00010025	0.00179711	CCT3
CG14880	43.6941	-3.52718	0.907157	-3.88817	0.000101002	0.00180811	CG14880
CG42554	65.1612	1.71089	0.44047	3.88424	0.00010265	0.00183511	CG42554
mv	862.859	1.23116	0.317017	3.88358	0.000102931	0.00183764	mv
CDase	114.455	-1.14481	0.294825	-3.88303	0.000103164	0.0018393	CDase
hoe1	423.936	0.974032	0.250946	3.88144	0.00010384	0.00184883	hoe1
Hsp70Aa	198.36	-3.164	0.815505	-3.8798	0.000104542	0.0018588	Hsp70Aa
phu	22.8793	-4.189	1.07995	-3.87887	0.000104943	0.00186341	phu
CG31676	520.822	1.19375	0.307911	3.87692	0.000105786	0.00187585	CG31676
Pcyt1	1112.74	0.832794	0.215104	3.87159	0.000108128	0.00191479	Pcyt1
Gli	593.111	-0.931433	0.24085	-3.86727	0.00011006	0.00194638	Gli
CG1698	490.953	-1.27706	0.330335	-3.86594	0.000110662	0.00195176	CG1698
CG8545	432.825	-0.680912	0.176119	-3.8662	0.000110543	0.00195176	CG8545
ewg	495.591	0.903682	0.233879	3.86389	0.000111597	0.0019656	ewg
Argk2	20.86	2.50597	0.648631	3.86348	0.000111782	0.00196622	Argk2
Syt12	35.4726	2.31226	0.59881	3.86142	0.00011273	0.00198024	Syt12
grh	2772.35	-0.723894	0.187485	-3.86107	0.00011289	0.00198041	grh
Cpr78Cc	1212.66	-1.77814	0.461631	-3.85188	0.000117216	0.00205355	Cpr78Cc
chrb	3895.34	1.23609	0.321279	3.8474	0.000119377	0.00208862	chrb
lncRNA:CR43301	94.8915	2.41916	0.629329	3.84403	0.000121028	0.00211469	lncRNA:CR43301
CG13784	989.031	-0.748645	0.194784	-3.84347	0.000121307	0.00211675	CG13784
alpha-Est7	585.87	-0.724479	0.18876	-3.8381	0.000123989	0.00216067	alpha-Est7
lncRNA:CR44417	96.7123	1.33341	0.347484	3.83733	0.00012438	0.0021646	lncRNA:CR44417
CG34296	64.3255	-5.45081	1.42246	-3.83197	0.000127119	0.00220934	CG34296
CG18473	1070.58	0.959788	0.250783	3.82717	0.000129625	0.00224992	CG18473
Dhpr	442.594	-1.59742	0.417428	-3.82681	0.000129816	0.00225025	Dhpr
asRNA:CR44030	235.356	1.45822	0.381126	3.82608	0.000130199	0.00225392	asRNA:CR44030
CG5674	380.748	0.950232	0.248417	3.82515	0.000130691	0.00225945	CG5674
Mst77F	48.8382	3.03469	0.793723	3.82336	0.000131645	0.00227295	Mst77F
CG8012	67.4261	-1.33278	0.348648	-3.8227	0.000131998	0.00227606	CG8012
CG12075	1470.17	-0.952348	0.249542	-3.81637	0.000135427	0.00233211	CG12075
Lkr	147.809	2.34127	0.613777	3.81452	0.000136448	0.00234662	Lkr
Fkbp39	484.037	-0.899179	0.235859	-3.81236	0.000137645	0.00236325	Fkbp39
asRNA:CR44911	74.1923	-1.28353	0.336695	-3.81213	0.000137775	0.00236325	asRNA:CR44911
CG17224	203.679	1.11916	0.29368	3.81081	0.000138511	0.00237277	CG17224
lncRNA:CR32690	13.2181	4.15625	1.09104	3.80942	0.000139291	0.00238303	lncRNA:CR32690
Hsc70-4	41193.6	-0.729017	0.191392	-3.80903	0.000139513	0.00238371	Hsc70-4
CG6142	110.786	-1.41702	0.372141	-3.80775	0.000140237	0.00239295	CG6142
CG11155	2251.94	0.791511	0.207886	3.80743	0.000140418	0.00239295	CG11155
Prp39	756.917	0.704557	0.185192	3.80447	0.000142106	0.00241857	Prp39
CG34222	224.975	-1.05313	0.27684	-3.80413	0.000142304	0.00241881	CG34222
Tsr1	504.404	-0.651092	0.171204	-3.80302	0.000142943	0.00242652	Tsr1
LManI	92.1784	-2.33785	0.615009	-3.80133	0.000143924	0.00244001	LManI
esg	99.1095	-1.41791	0.373109	-3.80025	0.00014455	0.00244747	esg
VepD	21.5653	2.3509	0.618677	3.79989	0.000144761	0.00244788	VepD
CG13678	428.218	-1.94632	0.512372	-3.79865	0.000145489	0.00245702	CG13678
CG1416	639.005	-0.702136	0.185346	-3.78824	0.000151717	0.00255892	CG1416
IleRS	1176.91	-0.62517	0.165241	-3.78339	0.000154704	0.00260594	IleRS
CG7910	566.745	-1.35165	0.357374	-3.78216	0.000155474	0.00261555	CG7910
RIC-3	2878.59	0.883259	0.233562	3.78168	0.000155771	0.00261719	RIC-3
Vrp1	703.757	-0.970246	0.256616	-3.78093	0.000156241	0.00262173	Vrp1
asRNA:CR46136	20.0536	2.42408	0.641361	3.77959	0.000157087	0.00262589	asRNA:CR46136
CG32388	18.9403	5.58367	1.47732	3.77959	0.000157089	0.00262589	CG32388
CG43439	18.9403	5.58367	1.47732	3.77959	0.000157089	0.00262589	CG43439
asRNA:CR45341	49.0212	-2.05345	0.543725	-3.77662	0.000158968	0.00265392	asRNA:CR45341
asRNA:CR43470	1087.11	-0.97832	0.259329	-3.77251	0.000161615	0.00269437	asRNA:CR43470
asRNA:CR44987	429.814	1.06631	0.282674	3.77222	0.000161802	0.00269437	asRNA:CR44987
Rab11	2055.23	-0.640968	0.170659	-3.75584	0.00017276	0.00287292	Rab11
Cyp313a3	99.1124	-2.50071	0.665927	-3.75523	0.000173181	0.00287292	Cyp313a3
Lst	1266.02	-1.08767	0.289623	-3.75546	0.000173021	0.00287292	Lst
NUCB1	1217.04	-0.812569	0.216527	-3.75273	0.000174917	0.00289806	NUCB1
Gabat	253.33	1.0538	0.281089	3.74898	0.000177557	0.00293809	Gabat
CG9512	838.927	-1.04664	0.279546	-3.74407	0.000181061	0.0029923	CG9512
CG31028	294.527	-0.871695	0.232883	-3.74307	0.000181789	0.00300055	CG31028
nAChRalpha6	431.205	2.2264	0.595008	3.7418	0.000182709	0.00301195	nAChRalpha6
alpha-Est8	323.264	1.05812	0.28281	3.74147	0.000182944	0.00301203	alpha-Est8
PMCA	7781.81	-0.661897	0.176923	-3.74116	0.000183174	0.00301204	PMCA
Vajk3	11602.2	-1.28372	0.343177	-3.74068	0.00018352	0.00301396	Vajk3
CG6700	1422.84	0.886627	0.237543	3.73249	0.000189596	0.00310985	CG6700
alphaTub84D	587.296	-0.840348	0.225386	-3.72849	0.000192632	0.00315571	alphaTub84D
CG6834	267.168	-1.41084	0.378548	-3.72697	0.000193797	0.00316687	CG6834
lncRNA:CR45517	80.5005	2.10173	0.563917	3.72702	0.000193754	0.00316687	lncRNA:CR45517
pigs	1349.92	-1.04914	0.281907	-3.7216	0.000197964	0.00322828	pigs
CG10462	544.782	0.846442	0.227447	3.7215	0.000198046	0.00322828	CG10462
Pi4KIIalpha	357.136	0.742404	0.199558	3.72025	0.000199029	0.00324027	Pi4KIIalpha
caps	1029.49	-0.705906	0.1898	-3.7192	0.000199851	0.00324962	caps
CG42709	173.858	-1.06522	0.286669	-3.71586	0.000202517	0.00328889	CG42709
asRNA:CR43629	93.8338	-1.32912	0.357826	-3.71444	0.000203657	0.00329731	asRNA:CR43629
yellow-e2	309.586	-1.15194	0.31019	-3.71365	0.000204291	0.00329731	yellow-e2
Arf1	3976.5	-0.570517	0.153621	-3.7138	0.000204171	0.00329731	Arf1
CG6209	26.2558	4.03959	1.08741	3.71486	0.00020332	0.00329731	CG6209
CNT2	119.705	-1.15327	0.310516	-3.71403	0.000203981	0.00329731	CNT2
cpa	1041.29	-0.601062	0.161956	-3.71127	0.000206223	0.0033244	cpa
Cyp313b1	297.776	-1.01897	0.274614	-3.71057	0.000206797	0.00332956	Cyp313b1
CG14997	618.802	0.674852	0.181892	3.71017	0.00020712	0.00333067	CG14997
CG3902	1386.04	-1.03455	0.278876	-3.7097	0.000207504	0.00333213	CG3902
Ae2	620.023	-0.955841	0.2577	-3.70913	0.000207973	0.00333213	Ae2
Catsup	468.858	-0.699337	0.188543	-3.70916	0.000207946	0.00333213	Catsup
lncRNA:CR44999	776.044	-1.16162	0.313688	-3.70311	0.000212972	0.00340807	lncRNA:CR44999
CG14445	866.217	-1.27332	0.3439	-3.70259	0.000213411	0.00341093	CG14445
S-Lap2	40.3817	3.80297	1.02741	3.70151	0.000214321	0.00341993	S-Lap2
CCT5	1168.6	-0.68644	0.185459	-3.7013	0.000214495	0.00341993	CCT5
CG1494	31.6828	2.24977	0.608145	3.69941	0.000216105	0.00343725	CG1494
CG13116	45.2675	-2.9915	0.808576	-3.69971	0.000215845	0.00343725	CG13116
CG2972	195.794	-0.867811	0.234662	-3.69814	0.000217188	0.00345029	CG2972
CG8908	52.2711	1.97255	0.53386	3.69488	0.000219989	0.00349057	CG8908
CG5728	325.8	-0.975374	0.26408	-3.69347	0.000221212	0.00350573	CG5728
bs	315.687	-1.01187	0.274089	-3.69174	0.000222721	0.00352538	bs
prc	266.002	-2.198	0.595808	-3.6891	0.000225045	0.00355788	prc
PIP4K	1252.14	0.905463	0.245586	3.68695	0.000226956	0.00358378	PIP4K
pinta	33.8449	-1.98499	0.538622	-3.6853	0.00022843	0.00360272	pinta
Hsp70Bbb	64.6554	-4.10843	1.11539	-3.6834	0.000230143	0.00362538	Hsp70Bbb
Obp83g	524.934	-1.35664	0.368552	-3.681	0.000232325	0.00365535	Obp83g
CG13218	76.6455	3.06206	0.83236	3.67876	0.000234369	0.0036831	CG13218
Lsd-1	419.301	-1.88736	0.513247	-3.67728	0.00023573	0.00370002	Lsd-1
18w	273.726	-1.27546	0.346877	-3.67698	0.00023601	0.00370002	18w
g	591.123	0.868372	0.236384	3.67356	0.000239194	0.00374547	g
wcd	87.3149	-1.1706	0.318702	-3.67301	0.000239708	0.00374904	wcd
AcCoAS	1072.16	-1.5421	0.420009	-3.67159	0.000241047	0.0037655	AcCoAS
asRNA:CR17025	32.9281	-2.10651	0.573896	-3.67054	0.000242041	0.00377653	asRNA:CR17025
Nopp140	622.839	-1.02411	0.279236	-3.66757	0.000244871	0.00381614	Nopp140
CG3328	1747.91	-0.944663	0.257608	-3.66706	0.000245353	0.00381913	CG3328
CG6040	1477.73	-1.14443	0.312361	-3.66381	0.000248496	0.00385789	CG6040
lncRNA:yar	18.3395	3.164	0.863623	3.66363	0.000248661	0.00385789	lncRNA:yar
Ran	2249.16	-0.558914	0.15256	-3.66357	0.000248725	0.00385789	Ran
DZIP1	26.8712	1.92729	0.526589	3.65996	0.000252259	0.00390807	DZIP1
Sox100B	51.8389	1.5788	0.431446	3.65932	0.000252882	0.00391118	Sox100B
CG42266	17.1138	3.73617	1.02105	3.65915	0.000253056	0.00391118	CG42266
Cdc37	387.647	-0.726967	0.198997	-3.65315	0.000259041	0.00399775	Cdc37
CG8850	258.687	1.05504	0.28882	3.65293	0.000259266	0.00399775	CG8850
CG17549	3373.93	-0.838201	0.230109	-3.64262	0.000269875	0.00415645	CG17549
Cyp6a20	305.599	1.08767	0.298843	3.63961	0.000273056	0.00420052	Cyp6a20
CG30389	773.161	0.780871	0.214641	3.63804	0.000274724	0.00422122	CG30389
bmm	174.259	1.02874	0.282959	3.63565	0.000277276	0.00425048	bmm
Cadps	560.195	0.962025	0.264603	3.63573	0.000277196	0.00425048	Cadps
CG8312	960.802	-0.644047	0.177301	-3.63251	0.000280683	0.00429727	CG8312
CG4462	259.876	-1.37639	0.378969	-3.63193	0.000281311	0.00429727	CG4462
CG9458	98.5905	-2.24984	0.619439	-3.63207	0.000281157	0.00429727	CG9458
CngA	71.9224	-2.10046	0.578838	-3.62874	0.000284804	0.00434558	CngA
GstD10	253.843	-1.26667	0.349273	-3.62658	0.000287198	0.00437702	GstD10
Argk1	76796.2	0.903486	0.249284	3.62433	0.000289715	0.00441026	Argk1
CG5955	105.56	1.38695	0.383131	3.62004	0.000294559	0.00447574	CG5955
Fs	95.5854	1.3677	0.377827	3.61992	0.000294699	0.00447574	Fs
CG7227	19.2012	-2.72923	0.754332	-3.61807	0.000296811	0.00450261	CG7227
Cpr65Au	79.0213	-2.063	0.570266	-3.61761	0.000297337	0.00450538	Cpr65Au
Ipp	219.763	1.23511	0.34161	3.61556	0.000299694	0.00452233	Ipp
CG34305	482.366	-1.62379	0.449038	-3.61615	0.000299012	0.00452233	CG34305
asRNA:CR44984	68.586	-1.68841	0.466939	-3.61591	0.00029929	0.00452233	asRNA:CR44984
Hacd1	243.905	-1.03479	0.286213	-3.61544	0.000299834	0.00452233	Hacd1
Pli	574.877	0.696075	0.192609	3.61392	0.000301599	0.00454372	Pli
CG42788	760.141	-0.865478	0.239671	-3.61111	0.000304888	0.00458275	CG42788
CG43139	32.8486	7.1254	1.97318	3.61113	0.000304867	0.00458275	CG43139
CG12826	542.594	-1.50764	0.418016	-3.60667	0.000310153	0.00465655	CG12826
CG9269	368.177	1.17184	0.324946	3.60627	0.000310635	0.00465846	CG9269
CG34155	39.9498	2.07419	0.57567	3.60309	0.000314454	0.00471034	CG34155
CG12268	321.11	-1.19267	0.331228	-3.60076	0.000317283	0.0047473	CG12268
Vha100-4	22.9909	-6.21326	1.72598	-3.59984	0.000318408	0.00475871	Vha100-4
CG34220	98.5501	2.52426	0.701465	3.59855	0.000319995	0.00477699	CG34220
Sf3b6	409.713	-0.92461	0.257063	-3.59683	0.000322123	0.0048033	Sf3b6
Sulf1	417.092	0.866461	0.241067	3.59427	0.0003253	0.00484516	Sulf1
CG9795	484.841	0.621238	0.172906	3.59293	0.000326984	0.00486042	CG9795
Alp13	11.1801	3.5648	0.992271	3.59257	0.000327435	0.00486042	Alp13
CG14230	115.477	-1.08763	0.302736	-3.59267	0.000327301	0.00486042	CG14230
lncRNA:CR46006	196.494	1.25692	0.350158	3.58957	0.000331218	0.00489442	lncRNA:CR46006
Atg1	470.739	0.685763	0.191024	3.58992	0.000330778	0.00489442	Atg1
l(2)05287	228.948	-1.15087	0.320592	-3.58982	0.0003309	0.00489442	l(2)05287
anne	4215.54	0.736749	0.205224	3.58997	0.000330712	0.00489442	anne
lncRNA:CR32658	33.4478	4.27356	1.1909	3.58852	0.000332559	0.00490871	lncRNA:CR32658
mod	1812.65	-0.663369	0.184925	-3.58724	0.000334201	0.0049274	mod
lncRNA:CR31451	790.453	1.06499	0.297048	3.58526	0.000336744	0.00495932	lncRNA:CR31451
rngo	1111.7	0.751035	0.209508	3.58476	0.000337382	0.00496315	rngo
UbcE2H	1515.45	0.796323	0.222192	3.58394	0.000338456	0.00497337	UbcE2H
PIG-N	119.16	1.08306	0.302239	3.58347	0.000339058	0.00497664	PIG-N
CG31777	27.9809	-3.12124	0.87122	-3.58261	0.000340177	0.00498748	CG31777
Rsbp15	7.16558	6.51885	1.82065	3.5805	0.000342935	0.00502231	Rsbp15
CG13847	54.94	-3.06738	0.856904	-3.5796	0.000344119	0.00503404	CG13847
CG32249	12272.8	-1.62895	0.455112	-3.57924	0.0003446	0.00503545	CG32249
Cpr	1679.02	-0.900366	0.25162	-3.57827	0.000345875	0.00504846	Cpr
CG5445	528.137	0.721639	0.201701	3.57776	0.000346555	0.00505278	CG5445
CG14257	80.0721	-3.78622	1.05853	-3.57687	0.000347731	0.00506429	CG14257
CG34025	13.3615	3.59404	1.00516	3.57559	0.000349435	0.00508346	CG34025
Nmnat	140.244	0.985116	0.275662	3.57364	0.000352058	0.00511595	Nmnat
Muc11A	4341.68	2.02694	0.567331	3.57276	0.000353235	0.00512737	Muc11A
Dh44-R2	527.39	0.970707	0.271884	3.57029	0.000356582	0.00517024	Dh44-R2
CG16727	324.828	1.95839	0.54857	3.56999	0.000356989	0.00517042	CG16727
CG17027	191.239	-1.13693	0.318554	-3.56904	0.00035829	0.00518356	CG17027
asRNA:CR44891	70.1936	-1.48845	0.417263	-3.56716	0.000360868	0.0052151	asRNA:CR44891
Cyp4c3	730.875	-1.51423	0.424604	-3.56622	0.000362162	0.00522317	Cyp4c3
CG8028	97.9872	1.87952	0.527066	3.566	0.00036247	0.00522317	CG8028
CG5181	1055.42	0.951764	0.266908	3.56589	0.000362621	0.00522317	CG5181
7SLRNA:CR42652	7.51645	-5.45609	1.53102	-3.56369	0.000365675	0.00526139	7SLRNA:CR42652
Hmu	2423.48	-1.09003	0.306113	-3.56087	0.000369631	0.00531248	Hmu
LanB2	1564.81	-0.965808	0.271342	-3.55938	0.000371737	0.00533108	LanB2
lncRNA:CR44698	14.6114	2.84051	0.798008	3.5595	0.000371561	0.00533108	lncRNA:CR44698
Droj2	2709.94	-0.653872	0.183759	-3.55831	0.000373253	0.00534498	Droj2
ush	280.803	-1.42939	0.401728	-3.55812	0.000373521	0.00534498	ush
Ate1	273.523	0.718647	0.202094	3.55601	0.000376532	0.00538219	Ate1
Sh	2250.12	1.3102	0.368534	3.55516	0.000377755	0.00539031	Sh
Ac3	99.7541	2.0181	0.567672	3.55504	0.000377922	0.00539031	Ac3
CG15890	451.247	1.02194	0.287506	3.5545	0.000378693	0.00539545	CG15890
CG13437	154.931	1.27778	0.359604	3.55329	0.000380451	0.00541462	CG13437
CG4393	266.845	1.0098	0.2843	3.55187	0.000382504	0.00543056	CG4393
lncRNA:CR44691	92.2296	-1.26718	0.356814	-3.55137	0.000383227	0.00543056	lncRNA:CR44691
CG43322	16.6508	2.2795	0.641806	3.55169	0.000382765	0.00543056	CG43322
Piezo	2228.62	-0.864085	0.24331	-3.55138	0.000383222	0.00543056	Piezo
lncRNA:CR44816	667.751	1.00899	0.284157	3.55083	0.000384019	0.00543592	lncRNA:CR44816
Gk2	167.719	-0.869187	0.244902	-3.54913	0.000386509	0.00546527	Gk2
CG15312	76.0218	1.31545	0.370688	3.54867	0.000387177	0.00546883	CG15312
dpr7	118.447	1.45213	0.409782	3.54367	0.000394601	0.0055677	dpr7
CG30371	98.5141	2.07074	0.584643	3.54189	0.000397265	0.00559325	CG30371
Nhe3	694.197	0.713511	0.201449	3.5419	0.000397255	0.00559325	Nhe3
lncRNA:CR46488	104.96	1.15336	0.325742	3.54072	0.000399041	0.00561224	lncRNA:CR46488
Fam92	16.4235	3.58095	1.01158	3.53995	0.000400201	0.00562253	Fam92
CG17190	134.241	-1.76335	0.498222	-3.5393	0.000401196	0.00563048	CG17190
CG18135	1150.21	1.24273	0.351246	3.53805	0.000403087	0.00565097	CG18135
CG18747	21.0853	-2.83881	0.802806	-3.53612	0.000406056	0.005677	CG18747
CG14367	125.835	1.48759	0.420699	3.536	0.000406241	0.005677	CG14367
CG4239	2536.14	0.843726	0.238595	3.53622	0.000405893	0.005677	CG4239
Grd	56.0347	1.6186	0.458608	3.52937	0.000416548	0.00581483	Grd
CG3726	216.488	1.3706	0.388383	3.529	0.000417136	0.00581685	CG3726
Mnr	2213.55	0.662869	0.187867	3.5284	0.000418086	0.00582391	Mnr
CG8740	2566.59	-0.882288	0.250099	-3.52775	0.000419106	0.00583192	CG8740
DCTN2-p50	363.221	-0.605907	0.171772	-3.52739	0.00041968	0.00583372	DCTN2-p50
Sirt1	759.083	-0.529883	0.150322	-3.52499	0.000423494	0.00588052	Sirt1
Zip71B	342.757	1.19344	0.338632	3.5243	0.000424611	0.00588979	Zip71B
asRNA:CR43425	163.2	1.66123	0.47149	3.52337	0.000426093	0.00590412	asRNA:CR43425
hh	61.0995	1.40533	0.398911	3.52292	0.00042682	0.00590795	hh
hppy	518.571	0.877399	0.249084	3.52251	0.00042748	0.00591085	hppy
TORIP	228.013	-0.73875	0.209761	-3.52186	0.000428524	0.00591904	TORIP
CG10916	170.961	0.858221	0.243759	3.52077	0.000430292	0.00593721	CG10916
CG33941	238.207	1.2927	0.367313	3.51934	0.000432616	0.00596301	CG33941
fend	80.3886	1.54832	0.440597	3.51413	0.000441195	0.00607488	fend
CG2070	122.484	-2.85407	0.812329	-3.51344	0.000442348	0.00608437	CG2070
Strica	175.461	-0.958026	0.272725	-3.5128	0.000443415	0.00609266	Strica
CG42246	70.5274	-1.97883	0.563939	-3.50895	0.000449876	0.00617497	CG42246
CG17272	368.585	-1.17754	0.335617	-3.50857	0.000450522	0.00617738	CG17272
asRNA:CR46263	48.5952	-2.12259	0.605901	-3.50319	0.000459719	0.0062969	asRNA:CR46263
asRNA:CR44847	63.5701	-1.56974	0.44822	-3.50215	0.000461515	0.00631491	asRNA:CR44847
CG42324	238.445	1.30932	0.374277	3.49827	0.000468289	0.00640093	CG42324
pre-mod(mdg4)-AE	179.958	1.07915	0.308915	3.49337	0.000476968	0.00649924	pre-mod(mdg4)-AE
pre-mod(mdg4)-Y	179.958	1.07915	0.308915	3.49337	0.000476968	0.00649924	pre-mod(mdg4)-Y
pre-mod(mdg4)-AD	179.958	1.07915	0.308915	3.49337	0.000476968	0.00649924	pre-mod(mdg4)-AD
Pgant9	798.629	-1.04863	0.300408	-3.49068	0.000481801	0.00655331	Pgant9
Gal	178.564	-1.30715	0.374478	-3.4906	0.000481934	0.00655331	Gal
Rb97D	426.354	0.711462	0.203922	3.4889	0.000485016	0.00658255	Rb97D
CG4829	590.831	-0.788909	0.226123	-3.48886	0.000485088	0.00658255	CG4829
lncRNA:Hsromega	1204.83	1.30277	0.373583	3.48722	0.000488064	0.00661609	lncRNA:Hsromega
Mthfs	79.326	1.31946	0.378922	3.48214	0.000497432	0.00673612	Mthfs
CG43182	35.9071	3.80749	1.09381	3.48095	0.000499636	0.00675899	CG43182
asRNA:CR44119	168.969	0.808654	0.232357	3.48022	0.000500998	0.00677044	asRNA:CR44119
lncRNA:CR43857	24.0183	2.48201	0.714304	3.47473	0.000511373	0.00690354	lncRNA:CR43857
Cse1	378.397	-0.965571	0.278217	-3.47057	0.000519355	0.00700408	Cse1
asRNA:CR44996	15.8141	-2.94316	0.848729	-3.46772	0.000524892	0.0070715	asRNA:CR44996
AdamTS-B	670.323	-1.20258	0.34719	-3.46375	0.000532704	0.00716938	AdamTS-B
Pgant1	1634.53	-0.792976	0.229056	-3.46193	0.000536313	0.00721055	Pgant1
mir-8	12.8438	3.16224	0.913576	3.46138	0.000537406	0.00721122	mir-8
Amnionless	46.0856	-2.23853	0.646722	-3.46136	0.000537462	0.00721122	Amnionless
Kap-alpha3	2636.49	-0.582402	0.168334	-3.45979	0.000540592	0.00724305	Kap-alpha3
CG13946	18.738	6.09533	1.76185	3.45962	0.000540938	0.00724305	CG13946
CG12106	124.172	1.20712	0.349152	3.45731	0.000545602	0.00729599	CG12106
Cht10	4515.02	-2.17183	0.628222	-3.45711	0.000546004	0.00729599	Cht10
asRNA:CR45928	90.8818	-1.09004	0.31546	-3.45541	0.000549459	0.0073347	asRNA:CR45928
Sply	249.4	-1.3473	0.390016	-3.45448	0.000551345	0.00734493	Sply
Nepl3	94.8519	-1.74689	0.505656	-3.45469	0.000550925	0.00734493	Nepl3
CG2278	134.95	1.43443	0.415332	3.4537	0.000552956	0.00735891	CG2278
Inos	1821.04	0.4461	0.129232	3.45193	0.000556602	0.00739993	Inos
Ugt302E1	13.842	-3.69453	1.07138	-3.44838	0.000563959	0.00749015	Ugt302E1
CG32767	1564.05	1.07448	0.311801	3.44605	0.000568841	0.00754735	CG32767
Kul	1922.67	-0.999058	0.289987	-3.44518	0.000570679	0.00756409	Kul
CG7164	16.4287	3.85607	1.11943	3.44467	0.000571757	0.00757073	CG7164
Jwa	886.291	-0.709293	0.206018	-3.44287	0.000575583	0.00761371	Jwa
CG5254	1199.97	0.90216	0.262207	3.44064	0.00058033	0.00766877	CG5254
Snmp2	336.826	0.879507	0.255697	3.43965	0.000582462	0.00768921	Snmp2
ACC	2104.53	-1.89253	0.550825	-3.43581	0.000590787	0.00779126	ACC
Cndp2	986.798	-0.872925	0.254125	-3.43503	0.000592498	0.00780599	Cndp2
DopEcR	297.036	1.09654	0.319283	3.43439	0.000593892	0.0078165	DopEcR
CG33939	88.8939	-1.34732	0.392615	-3.43166	0.000599899	0.00788765	CG33939
lncRNA:CR45177	42.1181	1.71577	0.500146	3.43054	0.000602376	0.00791229	lncRNA:CR45177
Jheh2	590.3	-1.06122	0.309385	-3.4301	0.000603358	0.00791727	Jheh2
spz	305.358	-0.938626	0.273696	-3.42944	0.000604823	0.00792731	spz
Edg91	232.792	0.965927	0.281676	3.42921	0.000605332	0.00792731	Edg91
DIP1	2448.36	0.85417	0.24911	3.42889	0.000606059	0.00792892	DIP1
Ccp84Ad	115.457	1.49786	0.436901	3.42838	0.000607195	0.00793587	Ccp84Ad
CG46317	2578.53	-1.2392	0.361564	-3.42734	0.000609519	0.00795831	CG46317
CG13097	160.814	-0.834929	0.243702	-3.42602	0.0006125	0.00798929	CG13097
CG42525	14.6331	2.8911	0.844041	3.4253	0.000614112	0.00800236	CG42525
Ndg	3266.21	-1.03799	0.303062	-3.42502	0.000614755	0.0080028	Ndg
Ance	1023.98	-1.84325	0.538459	-3.4232	0.000618894	0.00804869	Ance
Asator	2213.8	0.849816	0.248334	3.42206	0.00062148	0.00807431	Asator
CG45050	15925.4	0.806998	0.23598	3.41977	0.000626743	0.00813464	CG45050
CG32276	1375.27	-0.692152	0.202572	-3.41683	0.000633556	0.00821494	CG32276
CG6154	29.4037	2.07676	0.607951	3.416	0.000635481	0.00823176	CG6154
ADD1	361.582	0.590076	0.17285	3.41381	0.000640612	0.00829005	ADD1
CG15247	1158.91	1.00988	0.296324	3.40803	0.000654329	0.00845922	CG15247
TkR99D	49.3013	1.35299	0.397342	3.4051	0.000661403	0.00854226	TkR99D
Cds	847.538	0.697746	0.205108	3.40185	0.000669309	0.00861891	Cds
Bfc	17.1243	4.24442	1.24754	3.40224	0.000668364	0.00861891	Bfc
CG13012	249.171	1.2968	0.381197	3.40193	0.000669118	0.00861891	CG13012
CG18547	221.755	-1.55675	0.457808	-3.40044	0.000672778	0.00865509	CG18547
CG12499	256.364	-1.10131	0.323923	-3.39992	0.000674062	0.00865924	CG12499
Srr	151.66	1.31284	0.386156	3.39977	0.000674421	0.00865924	Srr
CG30050	4.35632	-5.66884	1.66764	-3.39931	0.000675556	0.00866535	CG30050
Dis3	209.221	-0.751145	0.221032	-3.39835	0.000677938	0.00868388	Dis3
Treh	1160.49	0.772517	0.227332	3.39819	0.000678325	0.00868388	Treh
asRNA:CR44968	74.9923	1.1931	0.351185	3.39736	0.000680391	0.00870184	asRNA:CR44968
Tat	2652.23	-1.22169	0.359715	-3.39627	0.00068312	0.00872824	Tat
CG32647	64.5395	1.52898	0.450269	3.39571	0.000684512	0.00873751	CG32647
Uba5	286.155	-0.932758	0.275039	-3.39137	0.000695451	0.00886851	Uba5
Eb1	2376.4	-0.473127	0.139556	-3.39022	0.000698357	0.00889694	Eb1
Frq1	369.899	0.938724	0.277019	3.38867	0.000702336	0.00893894	Frq1
Cerk	579.673	0.563174	0.166694	3.37849	0.000728839	0.00926727	Cerk
CG31038	933.601	-0.475929	0.141009	-3.37516	0.000737719	0.0093711	CG31038
puc	1170.93	-0.888123	0.263202	-3.3743	0.000740045	0.00939156	puc
lncRNA:CR44423	8.36647	3.81685	1.13169	3.37269	0.000744379	0.00943743	lncRNA:CR44423
CG45095	6.38827	-5.7412	1.70257	-3.37209	0.000746009	0.00944897	CG45095
snoRNA:Or-aca1	7.72092	3.5929	1.06578	3.37115	0.000748558	0.00947211	snoRNA:Or-aca1
msps	1601.67	-0.548295	0.162657	-3.37086	0.000749344	0.00947291	msps
CTPsyn	388.625	-0.799001	0.237156	-3.3691	0.000754145	0.00951136	CTPsyn
CG4558	155.27	0.826182	0.245199	3.36944	0.000753211	0.00951136	CG4558
CG4887	540.034	0.731671	0.217181	3.36895	0.000754559	0.00951136	CG4887
CG17376	22.3813	5.30767	1.57643	3.36688	0.00076023	0.00957365	CG17376
CG13255	151.242	-1.50925	0.44834	-3.36631	0.000761803	0.00958426	CG13255
asRNA:CR45875	312.233	-0.834853	0.248167	-3.36407	0.000768009	0.00965307	asRNA:CR45875
CG5835	159.965	-1.24851	0.371426	-3.3614	0.000775487	0.00973775	CG5835
r	524.346	-1.11356	0.331423	-3.35994	0.000779601	0.00978004	r
CG8079	169.372	0.821075	0.244473	3.35855	0.000783524	0.00981049	CG8079
lncRNA:CR44471	6.46094	6.44749	1.91961	3.35875	0.000782957	0.00981049	lncRNA:CR44471
Acp65Aa	4.60199	-5.58915	1.66618	-3.35446	0.000795199	0.00994718	Acp65Aa
CG12129	106.906	-1.00933	0.300989	-3.35338	0.000798301	0.00997552	CG12129
CG30291	216.205	-0.774795	0.231065	-3.35315	0.000798984	0.00997552	CG30291
CG5455	489.992	-0.873791	0.26064	-3.35248	0.000800897	0.0099899	CG5455
Vps29	390.946	0.714772	0.213323	3.35065	0.000806228	0.0100468	Vps29
Lerp	288.743	1.0933	0.326558	3.34796	0.000814082	0.0101351	Lerp
dj	62.369	6.06554	1.81261	3.34631	0.000818954	0.0101799	dj
mwh	191.075	-1.74385	0.521142	-3.34621	0.000819232	0.0101799	mwh
CG42272	119.886	1.31334	0.392809	3.34346	0.000827415	0.0102718	CG42272
Mst36Fb	21.83	2.52239	0.754679	3.34234	0.000830765	0.0103037	Mst36Fb
CG6805	618.409	-0.63037	0.188746	-3.33978	0.000838458	0.0103795	CG6805
Lac	1239.8	-0.499563	0.149579	-3.33979	0.000838432	0.0103795	Lac
brk	164.148	-1.17281	0.351193	-3.33951	0.000839259	0.0103796	brk
CCT7	1057.28	-0.747112	0.223801	-3.33829	0.000842969	0.0104059	CCT7
CG2839	4.51493	5.81866	1.74299	3.33832	0.000842874	0.0104059	CG2839
CG15394	32.3117	1.77388	0.531474	3.33766	0.000844866	0.0104195	CG15394
asRNA:CR45611	72.3933	-1.22736	0.368134	-3.33399	0.000856094	0.010548	asRNA:CR45611
CG14401	710.255	1.30473	0.391424	3.3333	0.000858233	0.0105645	CG14401
Dso1	167.627	2.25532	0.676763	3.3325	0.000860689	0.0105848	Dso1
Nlg1	474.152	0.831054	0.249401	3.3322	0.000861633	0.0105865	Nlg1
Atg9	484.461	0.720626	0.216345	3.33091	0.000865615	0.0106254	Atg9
CheA87a	5.44937	-5.511	1.65505	-3.3298	0.000869084	0.0106581	CheA87a
Unr	7087.59	0.822054	0.247061	3.32734	0.0008768	0.0107426	Unr
mir-9372	34.9046	1.60122	0.481612	3.3247	0.000885128	0.0108309	mir-9372
Atg101	314.241	0.885221	0.266269	3.32454	0.000885657	0.0108309	Atg101
lncRNA:CR44977	51.9392	-2.75665	0.829258	-3.32424	0.000886609	0.0108325	lncRNA:CR44977
asRNA:CR44806	60.9021	-1.50703	0.453628	-3.32217	0.000893218	0.0109031	asRNA:CR44806
CG14963	129.284	1.71658	0.516874	3.32108	0.000896683	0.0109352	CG14963
Dbp73D	93.6267	-1.07735	0.324441	-3.32062	0.000898169	0.0109432	Dbp73D
lncRNA:CR45473	120.727	1.41031	0.425016	3.31825	0.000905822	0.0110262	lncRNA:CR45473
Ctl2	442.237	-0.744563	0.224512	-3.31636	0.000911973	0.0110907	Ctl2
Spn77Ba	739.605	-1.00627	0.303599	-3.31448	0.000918127	0.0111552	Spn77Ba
InR	2940.79	0.944983	0.285168	3.31378	0.000920443	0.011173	InR
CG8642	58.312	1.44399	0.435859	3.31297	0.000923108	0.011195	CG8642
CG33303	533.931	-0.744878	0.225074	-3.30948	0.000934691	0.011325	CG33303
NPFR	20.0826	1.96283	0.593189	3.30895	0.000936478	0.0113362	NPFR
CG33648	40.5616	-3.07698	0.930048	-3.30841	0.000938269	0.0113474	CG33648
CG34165	294.324	-1.54525	0.46727	-3.30698	0.000943081	0.0113951	CG34165
CG10286	254.647	-0.693556	0.209762	-3.30639	0.000945051	0.0114084	CG10286
asRNA:CR45943	127.33	-1.47489	0.446249	-3.30509	0.000949474	0.0114513	asRNA:CR45943
CG1137	14.5441	5.57763	1.68811	3.30406	0.000952943	0.0114826	CG1137
Cdc6	173.227	1.1578	0.350497	3.30332	0.000955473	0.0114919	Cdc6
Tango5	364.006	0.831573	0.251722	3.30354	0.000954713	0.0114919	Tango5
ogre	1003.4	-0.740879	0.224429	-3.30118	0.000962806	0.0115695	ogre
CG12877	160.603	0.800436	0.242494	3.30085	0.000963926	0.0115724	CG12877
RhoGAP68F	595.487	0.627203	0.190117	3.29904	0.000970146	0.0116258	RhoGAP68F
wnd	608.891	-0.598256	0.18134	-3.29908	0.000970008	0.0116258	wnd
CG11409	164.052	-1.64546	0.498815	-3.29873	0.000971241	0.0116283	CG11409
AdSS	4036.82	0.938128	0.284659	3.29562	0.000982034	0.0117468	AdSS
Mgstl	761.922	-0.848301	0.257525	-3.29405	0.00098754	0.0118019	Mgstl
CG6293	285.876	0.993569	0.301821	3.29191	0.000995088	0.0118813	CG6293
pyd	4006.16	1.13938	0.346416	3.28904	0.00100531	0.0119816	pyd
CG7568	733.595	0.811389	0.246678	3.28926	0.0010045	0.0119816	CG7568
SelG	516.566	-1.03402	0.314412	-3.28875	0.00100634	0.0119829	SelG
CG14926	13.5354	5.68577	1.72914	3.28822	0.00100824	0.0119947	CG14926
CG30039	16.921	5.40405	1.64433	3.28647	0.0010145	0.0120582	CG30039
CG44303	75.7889	1.22929	0.37411	3.28592	0.00101651	0.0120711	CG44303
Poxn	33.1729	-1.56321	0.4758	-3.28543	0.00101828	0.0120786	Poxn
CG31921	33.0356	3.2506	0.989459	3.28523	0.00101898	0.0120786	CG31921
CG5768	6.88383	-5.46317	1.6635	-3.28414	0.00102294	0.0121146	CG5768
CG12861	17.1172	5.14422	1.56669	3.28349	0.00102531	0.0121317	CG12861
CG32195	131.86	1.7372	0.529215	3.2826	0.00102855	0.0121591	CG32195
Acsx1R	96.783	2.08537	0.635353	3.28222	0.00102993	0.0121645	Acsx1R
mthl5	107.149	-1.48637	0.45329	-3.27906	0.00104152	0.0122792	mthl5
Sptr	89.0502	-1.33163	0.406079	-3.27925	0.00104083	0.0122792	Sptr
Ir25a	23.8248	2.02234	0.616898	3.27824	0.00104455	0.012304	Ir25a
hbs	327.637	-0.935528	0.285569	-3.27601	0.00105285	0.0123906	hbs
5PtaseI	208.035	0.844101	0.257708	3.27541	0.00105507	0.0124056	5PtaseI
asRNA:CR43889	60.9015	-2.0702	0.632396	-3.27359	0.00106191	0.0124748	asRNA:CR43889
TotA	60.869	3.14526	0.960955	3.27306	0.00106391	0.0124871	TotA
CG12539	66.8657	-3.42006	1.04507	-3.27257	0.00106576	0.0124977	CG12539
CG8929	540.747	0.77463	0.236753	3.27189	0.0010683	0.0125163	CG8929
Rdl	873.089	1.51018	0.461772	3.2704	0.00107396	0.0125714	Rdl
CG9646	230.581	0.639053	0.195561	3.26779	0.00108389	0.0126763	CG9646
CG15145	6.57692	6.50168	1.99171	3.26437	0.00109709	0.0128192	CG15145
tal-AA	597.397	-1.85449	0.568391	-3.2627	0.00110356	0.0128491	tal-AA
tal-1A	597.397	-1.85449	0.568391	-3.2627	0.00110356	0.0128491	tal-1A
tal-3A	597.397	-1.85449	0.568391	-3.2627	0.00110356	0.0128491	tal-3A
tal-2A	597.397	-1.85449	0.568391	-3.2627	0.00110356	0.0128491	tal-2A
Mst36Fa	19.5034	2.08681	0.640131	3.25997	0.00111422	0.0129617	Mst36Fa
CG9920	32.0803	3.04535	0.934815	3.2577	0.00112319	0.0130545	CG9920
CG43658	735.647	-0.830028	0.254935	-3.25584	0.00113058	0.0131288	CG43658
CG44422	119.711	1.40379	0.431342	3.25448	0.00113601	0.0131802	CG44422
CG34265	42.8136	-1.79701	0.55224	-3.25404	0.00113775	0.0131887	CG34265
Zmynd10	31.226	1.64419	0.505359	3.2535	0.00113992	0.0131905	Zmynd10
CG12715	188.09	9.14821	2.8118	3.25351	0.0011399	0.0131905	CG12715
Hydr1	142.358	0.793532	0.243943	3.25293	0.0011422	0.0132052	Hydr1
Shab	823.302	1.27693	0.392635	3.25219	0.00114518	0.013228	Shab
Bem46	113.72	0.868475	0.267097	3.25153	0.00114785	0.0132472	Bem46
CG17977	26.7741	1.84765	0.568506	3.25002	0.00115398	0.0132959	CG17977
asRNA:CR44910	72.3531	-1.32672	0.408223	-3.24999	0.0011541	0.0132959	asRNA:CR44910
Zip99C	494.097	0.781236	0.240487	3.24855	0.00115994	0.0133515	Zip99C
sr	415.353	-1.12627	0.346874	-3.24691	0.00116664	0.0134169	sr
CG2199	192.824	-0.805393	0.248079	-3.24652	0.00116827	0.0134239	CG2199
CG6055	124.695	1.18215	0.364238	3.24553	0.00117231	0.0134467	CG6055
ms(2)34Fe	7.00693	4.82588	1.48693	3.24553	0.00117231	0.0134467	ms(2)34Fe
Ns1	419.809	-0.732079	0.225589	-3.24519	0.00117374	0.0134487	Ns1
Btk	762.427	-0.717253	0.221034	-3.24499	0.00117454	0.0134487	Btk
step	788.263	0.621334	0.191526	3.24412	0.00117814	0.0134783	step
vig2	1461.79	-0.424873	0.130992	-3.24351	0.00118066	0.013488	vig2
Proc-R	399.864	0.800277	0.246739	3.24342	0.00118104	0.013488	Proc-R
CG6602	37.2605	1.83148	0.564811	3.24263	0.0011843	0.0135016	CG6602
Eip63F-1	1377.28	0.900085	0.27757	3.24274	0.00118388	0.0135016	Eip63F-1
CG30349	255.171	-0.683465	0.210998	-3.2392	0.00119864	0.0136415	CG30349
Rcd1	520.841	0.609644	0.188206	3.23924	0.00119849	0.0136415	Rcd1
CG3552	103.273	1.19418	0.368785	3.23815	0.00120306	0.0136798	CG3552
Zw	165.55	-1.55469	0.480172	-3.23777	0.00120467	0.0136863	Zw
Pcf11	1465.17	0.740505	0.228854	3.23571	0.0012134	0.0137736	Pcf11
CG6685	71.447	1.34926	0.417284	3.23343	0.00122312	0.0138719	CG6685
bun	10455	0.71815	0.222275	3.23091	0.00123396	0.0139827	bun
CG4452	405.324	0.93841	0.290493	3.23041	0.00123613	0.0139953	CG4452
cora	5297.72	-0.805076	0.249342	-3.2288	0.00124311	0.0140622	cora
Cpr60D	3113.25	-1.43401	0.444296	-3.2276	0.00124833	0.0140987	Cpr60D
CG8249	133.388	-1.41863	0.439536	-3.22756	0.00124849	0.0140987	CG8249
Idgf1	477.563	0.788337	0.244498	3.2243	0.00126279	0.0142443	Idgf1
Nup154	358.712	-0.78282	0.2428	-3.22413	0.00126355	0.0142443	Nup154
28SrRNA-Psi:CR45862	15061.3	-3.00436	0.932132	-3.2231	0.00126811	0.0142833	28SrRNA-Psi:CR45862
CG42489	25.9339	1.53698	0.477011	3.22211	0.00127249	0.0143205	CG42489
CG17377	16.8823	5.59175	1.73563	3.22173	0.00127417	0.0143271	CG17377
CG42697	36.6416	1.38845	0.431039	3.22116	0.00127672	0.0143434	CG42697
Mvl	671.116	0.904884	0.280947	3.22083	0.00127819	0.0143476	Mvl
Gart	230.116	-0.96339	0.299145	-3.22048	0.00127976	0.014353	Gart
CG6674	72.5186	1.18135	0.366882	3.21996	0.00128206	0.0143665	CG6674
Hand	96.4481	-1.20679	0.374858	-3.21933	0.0012849	0.0143861	Hand
tous	40.2605	2.32952	0.723772	3.21858	0.00128825	0.0144113	tous
ImpE2	388.425	-4.60345	1.43046	-3.21816	0.00129016	0.0144203	ImpE2
glob1	346.226	-1.23163	0.382791	-3.21751	0.00129311	0.014441	glob1
dar1	99.6318	-1.24882	0.388168	-3.21723	0.00129436	0.0144427	dar1
Acat1	774.553	-0.677266	0.210568	-3.21637	0.00129822	0.0144735	Acat1
Snm1	81.3855	1.14204	0.355482	3.21266	0.00131511	0.0146493	Snm1
Fkbp59	751.309	-0.569236	0.1774	-3.20877	0.00133305	0.0148366	Fkbp59
SoYb	44.4982	1.54927	0.483114	3.20683	0.00134204	0.014924	SoYb
Gr39a	54.4901	2.60353	0.812079	3.20601	0.0013459	0.0149542	Gr39a
Acox3	345.344	-1.07635	0.335794	-3.20539	0.00134879	0.0149737	Acox3
Hrd3	401.885	-0.676585	0.211208	-3.20341	0.00135812	0.0150644	Hrd3
CG11426	73.8277	1.1136	0.347697	3.20279	0.00136105	0.0150842	CG11426
oaf	385.061	0.658325	0.20561	3.20182	0.00136564	0.0151223	oaf
Mitf	1306.72	0.729591	0.228094	3.19864	0.00138077	0.015277	Mitf
att-ORFB	290.233	1.08633	0.339784	3.19712	0.00138809	0.015345	att-ORFB
sut4	10.2749	5.37887	1.68256	3.19685	0.00138939	0.0153464	sut4
CG11044	253.318	1.49802	0.468735	3.19589	0.00139402	0.0153717	CG11044
Inx2	2215.7	-0.915376	0.286406	-3.19608	0.00139308	0.0153717	Inx2
CG3335	179.431	-0.847796	0.265343	-3.1951	0.00139784	0.0153769	CG3335
Cyp4d20	74.5632	-1.47082	0.46034	-3.19506	0.001398	0.0153769	Cyp4d20
asRNA:CR44067	126.83	-0.994577	0.311255	-3.19538	0.00139648	0.0153769	asRNA:CR44067
CG11034	94.4063	-3.15458	0.987449	-3.19467	0.00139989	0.0153847	CG11034
CG32568	28.1693	2.79891	0.876373	3.19374	0.00140444	0.0154218	CG32568
Saf-B	1018.55	0.825526	0.258562	3.19276	0.0014092	0.0154499	Saf-B
LanA	4588.24	-1.07671	0.33724	-3.19273	0.00140936	0.0154499	LanA
CG42369	97.228	-1.50322	0.470927	-3.19204	0.00141274	0.0154741	CG42369
CG4592	453.406	-1.19078	0.373366	-3.18932	0.00142609	0.0156074	CG4592
CG6614	7.81376	5.82787	1.82828	3.18763	0.00143445	0.0156857	CG6614
SecS	331.169	1.08397	0.340251	3.18579	0.0014436	0.0157595	SecS
CG8046	21.9894	-2.17458	0.68257	-3.18586	0.00144322	0.0157595	CG8046
Rs1	283.586	-0.638632	0.200695	-3.1821	0.00146209	0.0159375	Rs1
LManII	561.679	-1.46338	0.459884	-3.18206	0.00146233	0.0159375	LManII
lncRNA:CR32660	22.518	2.91452	0.916199	3.1811	0.00146716	0.0159768	lncRNA:CR32660
Obp56a	1703.74	-1.19475	0.375729	-3.17981	0.00147374	0.0160352	Obp56a
REG	761.003	-0.544683	0.171318	-3.17936	0.00147599	0.0160463	REG
CG11069	189.184	-0.915845	0.288404	-3.17556	0.00149548	0.0162448	CG11069
mir-1	4.40135	5.76556	1.81605	3.17477	0.00149954	0.0162754	mir-1
CG31406	10.8641	4.66611	1.47088	3.17232	0.00151224	0.0163997	CG31406
nompA	71.2526	-2.01578	0.635642	-3.17126	0.0015178	0.0164464	nompA
CG7376	101.099	0.864923	0.272884	3.16956	0.00152669	0.016529	CG7376
CG13068	209.525	-5.31599	1.67764	-3.16873	0.00153105	0.0165626	CG13068
Marc	167.796	-0.677775	0.213988	-3.16734	0.00153838	0.0166282	Marc
mt:CoII	27337	1.07316	0.338872	3.16687	0.00154091	0.0166419	mt:CoII
eIF3b	5729.03	-0.569983	0.180032	-3.16602	0.00154543	0.0166658	eIF3b
CG6340	423.455	0.712525	0.225058	3.16597	0.00154567	0.0166658	CG6340
CG12868	74.9397	1.12871	0.356661	3.16465	0.00155268	0.0167276	CG12868
CG33178	694.786	-1.3801	0.43628	-3.16333	0.00155973	0.0167898	CG33178
sktl	885.113	-0.636721	0.201314	-3.16282	0.00156247	0.0168055	sktl
asRNA:CR44960	694.336	-1.37625	0.435179	-3.16249	0.00156428	0.0168112	asRNA:CR44960
CG11550	41.1232	-1.58459	0.501095	-3.16225	0.00156556	0.0168112	CG11550
AlaRS	1031.91	-0.721771	0.228408	-3.16	0.00157769	0.0169276	AlaRS
lncRNA:CR43635	6.85734	4.59899	1.45561	3.1595	0.00158041	0.0169291	lncRNA:CR43635
asRNA:CR43786	253.183	0.994782	0.314845	3.1596	0.00157988	0.0169291	asRNA:CR43786
ScsbetaA	5709.16	0.655936	0.207641	3.15898	0.00158322	0.0169454	ScsbetaA
CG4213	1437.26	0.543533	0.172255	3.1554	0.0016028	0.017141	CG4213
CG11360	756.339	0.976648	0.309548	3.15508	0.00160453	0.0171455	CG11360
CG6006	480.931	0.750616	0.238005	3.15379	0.00161165	0.0172075	CG6006
CG15475	6.52745	6.53015	2.07183	3.15188	0.00162224	0.0173065	CG15475
Atg17	930.06	0.529559	0.168042	3.15134	0.00162523	0.0173244	Atg17
CG4806	262.698	-0.85358	0.270945	-3.15038	0.00163058	0.0173673	CG4806
PolI	206.581	0.811984	0.257775	3.14997	0.00163285	0.0173774	PolI
CG4572	696.166	-0.718502	0.228462	-3.14495	0.00166112	0.0176541	CG4572
Smox	1776.03	0.476744	0.151594	3.14488	0.00166154	0.0176541	Smox
CG13737	93.8255	1.17198	0.37291	3.1428	0.00167339	0.0177512	CG13737
Prp19	164.496	-1.02358	0.325667	-3.14301	0.00167217	0.0177512	Prp19
CG3588	6168.18	-0.828777	0.263885	-3.14067	0.00168559	0.0178662	CG3588
CG1688	38.3971	-1.97722	0.6297	-3.13994	0.00168981	0.0178786	CG1688
tamo	435.332	-0.981398	0.312571	-3.13976	0.00169085	0.0178786	tamo
CG11655	83.4985	-1.0797	0.343842	-3.1401	0.00168888	0.0178786	CG11655
tx	357.256	-0.946936	0.30188	-3.13679	0.00170807	0.0180461	tx
lncRNA:roX1	12000.5	0.867055	0.276442	3.13649	0.00170985	0.0180504	lncRNA:roX1
CG34348	152.786	0.898896	0.28662	3.1362	0.00171153	0.0180537	CG34348
asRNA:CR46065	89.5918	1.42914	0.455782	3.13558	0.00171515	0.0180772	asRNA:CR46065
asRNA:Eig63F-2	71.4579	1.37176	0.437524	3.13529	0.00171686	0.0180805	asRNA:Eig63F-2
Dhc16F	23.1244	1.95576	0.623836	3.13506	0.00171821	0.0180805	Dhc16F
CG7728	245.62	-0.876356	0.27959	-3.13443	0.00172188	0.0181045	CG7728
asRNA:CR44431	701.454	-0.803609	0.256541	-3.13248	0.00173336	0.0182107	asRNA:CR44431
CG8064	111.744	-0.998625	0.318975	-3.13073	0.0017437	0.018293	CG8064
Samuel	550.901	-1.12634	0.359775	-3.13069	0.00174398	0.018293	Samuel
CG8785	240.382	-1.51187	0.483055	-3.1298	0.00174925	0.018319	CG8785
CG14022	163.93	1.75076	0.559365	3.1299	0.00174864	0.018319	CG14022
CG13004	328.497	1.03178	0.329701	3.12944	0.00175142	0.0183271	CG13004
TwdlM	2756.83	-2.39059	0.764264	-3.12796	0.00176023	0.0184045	TwdlM
orb2	337.403	1.18254	0.378108	3.12752	0.00176289	0.0184177	orb2
CG30278	7.42144	4.88006	1.56076	3.12671	0.00176771	0.0184534	CG30278
Mst84Dd	6.90335	5.63878	1.80395	3.12579	0.00177329	0.0184969	Mst84Dd
Taldo	574.025	-0.827292	0.264702	-3.12537	0.00177583	0.0185087	Taldo
Mipp1	549.002	-0.771967	0.247096	-3.12416	0.00178314	0.0185554	Mipp1
asRNA:CR44990	857.496	-0.558265	0.178688	-3.12425	0.00178258	0.0185554	asRNA:CR44990
CG42284	10.9345	2.63346	0.843234	3.12305	0.00178987	0.0186106	CG42284
spartin	120.171	0.944474	0.302469	3.12254	0.00179296	0.0186133	spartin
CG6785	49.6096	1.54754	0.495591	3.12261	0.00179253	0.0186133	CG6785
Pabp2	966.662	0.503433	0.1613	3.1211	0.00180175	0.0186898	Pabp2
Elp2	159.972	-0.895866	0.287101	-3.12038	0.00180617	0.0187208	Elp2
yin	289.463	-1.81529	0.582062	-3.11872	0.0018164	0.018812	yin
CG42853	16.5211	4.50014	1.44312	3.11833	0.00181877	0.0188217	CG42853
CG3679	433.003	-0.879316	0.282034	-3.11777	0.00182228	0.0188431	CG3679
CG46306	325.87	1.02375	0.328391	3.11749	0.00182398	0.0188459	CG46306
CG6481	8.82114	4.54067	1.45988	3.1103	0.00186899	0.0192958	CG6481
CG8500	185.2	1.18435	0.380951	3.10893	0.00187769	0.0193633	CG8500
Lcp65Aa	471.701	-1.46311	0.470634	-3.1088	0.00187848	0.0193633	Lcp65Aa
asRNA:CR45126	758.91	0.798387	0.256842	3.10848	0.00188054	0.0193693	asRNA:CR45126
fw	705.417	-0.98517	0.317095	-3.10686	0.00189084	0.01946	fw
CG11529	574.197	-1.40493	0.452337	-3.10594	0.00189674	0.0195055	CG11529
CG34205	13.9632	-3.41145	1.09857	-3.10536	0.0019005	0.0195288	CG34205
CG11029	67.0296	-1.56214	0.503163	-3.10465	0.00190506	0.0195604	CG11029
ras	485.926	-0.91248	0.294204	-3.10152	0.0019253	0.0197528	ras
Aef1	429.602	-0.739074	0.238394	-3.10022	0.0019338	0.0198245	Aef1
CG5966	168.543	1.9103	0.617111	3.09556	0.00196444	0.020121	CG5966
Tcs4	190.797	1.07365	0.346858	3.09535	0.00196579	0.020121	Tcs4
CG12402	54.2502	1.30923	0.423206	3.0936	0.00197745	0.0202245	CG12402
CG13857	13.6435	3.32826	1.07598	3.09322	0.00197995	0.0202343	CG13857
Drgx	17.5707	2.23427	0.722487	3.09247	0.00198497	0.0202699	Drgx
IntS3	749.709	0.619157	0.200235	3.09215	0.0019871	0.0202758	IntS3
ArgRS	455.836	-0.669312	0.21651	-3.09137	0.00199235	0.0203136	ArgRS
asRNA:CR45481	485.949	-1.03366	0.334619	-3.08906	0.00200794	0.0204567	asRNA:CR45481
lncRNA:CR43910	28.9869	1.9516	0.632037	3.08779	0.00201648	0.0205277	lncRNA:CR43910
Reg-5	933.904	-0.850792	0.275595	-3.08711	0.0020211	0.0205588	Reg-5
CG18011	161.808	0.692035	0.22428	3.08559	0.0020315	0.0206486	CG18011
CG6937	117.009	-0.916138	0.296955	-3.08511	0.00203477	0.0206658	CG6937
srp	130.639	-1.63057	0.528828	-3.08338	0.00204667	0.0207706	srp
CG9649	73.2344	-1.30809	0.424315	-3.08283	0.00205045	0.0207929	CG9649
Proc	312.82	1.32228	0.429044	3.08192	0.00205672	0.0208403	Proc
l(2)10685	65.0002	-1.25018	0.406174	-3.07793	0.00208443	0.0211048	l(2)10685
Cipc	998.427	-1.37169	0.445744	-3.0773	0.00208886	0.0211334	Cipc
nord	64.102	1.37915	0.448228	3.07689	0.00209172	0.0211461	nord
asRNA:CR46195	68.6111	-1.33992	0.435948	-3.07358	0.0021151	0.021366	asRNA:CR46195
snoRNA:Psi28S-3186	15.0777	2.2394	0.729065	3.0716	0.00212913	0.0214437	snoRNA:Psi28S-3186
Spn42Da	574.936	-0.558904	0.18195	-3.07175	0.00212808	0.0214437	Spn42Da
schlank	517.095	-0.639219	0.208134	-3.07119	0.00213207	0.0214437	schlank
CG6414	484.551	-1.03293	0.336306	-3.07142	0.00213045	0.0214437	CG6414
CG3823	74.2651	-1.55701	0.50681	-3.07217	0.00212512	0.0214437	CG3823
Ldsdh1	86.3249	-1.94309	0.632699	-3.07112	0.0021326	0.0214437	Ldsdh1
CG32639	5.66938	4.13213	1.34597	3.07	0.00214057	0.0215074	CG32639
lncRNA:CR45522	35.672	1.35133	0.440207	3.06975	0.00214239	0.0215091	lncRNA:CR45522
CG44215	398.215	-1.96851	0.641327	-3.06944	0.00214461	0.0215149	CG44215
CG5928	25.3034	-2.57363	0.839464	-3.0658	0.0021709	0.0217621	CG5928
CR43361	125.62	0.938872	0.306265	3.06556	0.00217264	0.0217629	CR43361
GluClalpha	172.536	1.71164	0.558493	3.06475	0.00217854	0.021788	GluClalpha
lbl	42.1401	-1.5286	0.498789	-3.06462	0.00217944	0.021788	lbl
Cnot4	1615.82	0.369699	0.120638	3.06453	0.00218013	0.021788	Cnot4
l(2)k09022	284.568	-1.10717	0.361387	-3.06366	0.00218647	0.0218347	l(2)k09022
Ankle2	426.906	0.81009	0.264729	3.06007	0.00221284	0.0220813	Ankle2
CG5151	1387.05	-0.821113	0.26836	-3.05974	0.00221526	0.0220886	CG5151
CG14868	36.3578	1.78794	0.584402	3.05944	0.00221749	0.0220941	CG14868
CG12480	2713.39	-1.421	0.464604	-3.05852	0.00222431	0.0221452	CG12480
lncRNA:CR45717	33.48	-1.68437	0.550799	-3.05805	0.00222782	0.0221634	lncRNA:CR45717
CG12825	100.806	1.35934	0.44456	3.05771	0.00223033	0.0221715	CG12825
Tl	765.671	-0.598861	0.19592	-3.05666	0.00223821	0.022233	Tl
Lrt	283.078	-0.712957	0.23341	-3.05452	0.00225419	0.0223579	Lrt
mspo	348.307	0.565549	0.18515	3.05455	0.00225399	0.0223579	mspo
lncRNA:CR42651	43.2771	2.04984	0.671339	3.05336	0.00226292	0.0224021	lncRNA:CR42651
Cdk7	72.799	-0.982296	0.321721	-3.05325	0.00226377	0.0224021	Cdk7
CG31948	15.0816	4.4058	1.44287	3.05349	0.00226195	0.0224021	CG31948
asRNA:CR46255	81.5745	-1.17978	0.386496	-3.0525	0.00226941	0.0224401	asRNA:CR46255
Pgls	64.816	-1.21328	0.397498	-3.05229	0.00227103	0.0224401	Pgls
CG15209	335.789	-0.850453	0.278675	-3.05178	0.0022749	0.0224614	CG15209
Cad87A	842.184	-0.857424	0.281028	-3.05103	0.00228056	0.0224852	Cad87A
lute	719.497	-0.778109	0.255033	-3.05101	0.00228073	0.0224852	lute
CG7742	21.6407	2.23071	0.731282	3.05041	0.00228529	0.0225132	CG7742
CG11961	414.458	-0.905732	0.297068	-3.0489	0.00229678	0.0226094	CG11961
CG11852	2373.96	-1.20731	0.396054	-3.04835	0.002301	0.022634	CG11852
CG8944	349.795	0.653814	0.214506	3.04799	0.00230375	0.022644	CG8944
Gel	2782.08	-0.678565	0.222734	-3.04653	0.00231497	0.0227313	Gel
Cpr78Ca	353.297	-1.54399	0.506827	-3.04639	0.00231609	0.0227313	Cpr78Ca
CG44000	1825.03	-0.425935	0.139838	-3.04591	0.00231978	0.0227335	CG44000
CG44001	1825.03	-0.425935	0.139838	-3.04591	0.00231978	0.0227335	CG44001
CR40190	63.937	-1.25242	0.411272	-3.04525	0.00232488	0.0227664	CR40190
Smyd4-3	157.196	-1.07627	0.353477	-3.04481	0.00232827	0.0227826	Smyd4-3
Atg4b	227.007	0.758609	0.249176	3.04448	0.00233087	0.0227911	Atg4b
CG33995	1823.64	-0.427317	0.140404	-3.04349	0.00233852	0.0228489	CG33995
DPCoAC	372.264	0.9504	0.312443	3.04184	0.00235138	0.0229575	DPCoAC
Cortactin	575.474	-0.729265	0.240057	-3.03788	0.00238249	0.0232439	Cortactin
Polr1E	129.669	-0.766804	0.252503	-3.03681	0.00239095	0.0233091	Polr1E
GNBP2	79.8403	-1.58019	0.520468	-3.03609	0.00239666	0.0233474	GNBP2
CG10051	20.6035	-3.71201	1.22323	-3.0346	0.00240851	0.0234455	CG10051
eIF4B	509.422	-0.727385	0.239757	-3.03385	0.00241456	0.0234869	eIF4B
CaMKII	3642.02	0.69701	0.229848	3.03248	0.00242554	0.0235763	CaMKII
NHP2	159.365	-1.11424	0.367586	-3.03123	0.00243562	0.0236567	NHP2
mt:ND5	8725.09	0.627132	0.206958	3.03024	0.00244357	0.0237163	mt:ND5
CG17264	33.064	1.53078	0.506085	3.02474	0.00248846	0.0241342	CG17264
CG18428	98.06	1.10472	0.365289	3.02423	0.0024927	0.024142	CG18428
CG33510	3.16256	-5.32968	1.76235	-3.0242	0.00249295	0.024142	CG33510
CG4465	154.422	-1.10002	0.363852	-3.02327	0.00250057	0.0241791	CG4465
btl	105.007	-0.9095	0.300829	-3.02332	0.0025002	0.0241791	btl
CG30377	247.453	-1.14784	0.379695	-3.02306	0.0025023	0.0241791	CG30377
Gnpat	110.078	1.05734	0.34984	3.02236	0.00250808	0.0241813	Gnpat
CG8671	532.827	0.532653	0.17625	3.02215	0.0025099	0.0241813	CG8671
lncRNA:CR46450	31.2778	1.53505	0.507869	3.02252	0.00250676	0.0241813	lncRNA:CR46450
CG9246	256.583	-0.727869	0.240834	-3.02228	0.00250878	0.0241813	CG9246
unc-45	554.961	-0.714766	0.236558	-3.02153	0.00251502	0.0242128	unc-45
AnxB10	140.54	-1.15932	0.383764	-3.02091	0.00252013	0.0242396	AnxB10
lncRNA:CR44964	134.016	-1.19487	0.395553	-3.02075	0.0025215	0.0242396	lncRNA:CR44964
CG42711	31.4063	-3.23855	1.07277	-3.01886	0.00253727	0.0243734	CG42711
CG7530	285.278	-0.781808	0.25909	-3.01751	0.0025486	0.0244644	CG7530
Drat	6248.7	0.871186	0.288917	3.01535	0.00256679	0.0246029	Drat
cta	355.536	0.683364	0.226627	3.01537	0.00256662	0.0246029	cta
cac	358.88	1.3516	0.448416	3.01416	0.00257695	0.0246823	cac
Nox	267.033	-1.17119	0.388717	-3.01296	0.00258716	0.024762	Nox
CG30197	271.619	-1.06752	0.354608	-3.01041	0.00260898	0.0249526	CG30197
eIF3e	1636.1	-0.687419	0.228428	-3.00934	0.00261816	0.0250222	eIF3e
CG1077	4.99443	6.06974	2.01776	3.00815	0.00262844	0.0251022	CG1077
CG2246	731.929	0.471456	0.156775	3.00722	0.00263647	0.0251605	CG2246
CG14397	16.4929	3.26689	1.08663	3.00645	0.00264315	0.025206	CG14397
asRNA:CR45108	31.2918	1.48894	0.495443	3.00527	0.00265348	0.0252861	asRNA:CR45108
Ccp84Aa	51.6406	1.67915	0.559087	3.00337	0.00267007	0.0254257	Ccp84Aa
CG2260	82.3704	-0.85538	0.284978	-3.00156	0.00268601	0.025559	CG2260
CG33483	9.39497	-3.15344	1.05072	-3.00123	0.00268895	0.0255684	CG33483
CG4822	236.233	-1.35845	0.452985	-2.99888	0.00270971	0.0257472	CG4822
CG13615	11.3617	-4.06201	1.35474	-2.99838	0.00271421	0.0257527	CG13615
CG17362	23.5488	4.99291	1.6652	2.99838	0.00271422	0.0257527	CG17362
lncRNA:CR45739	5.26512	-5.51694	1.84047	-2.99756	0.00272148	0.0258029	lncRNA:CR45739
CG4988	8.03365	6.81904	2.2752	2.99712	0.00272547	0.0258183	CG4988
uif	4056.23	-1.44061	0.480694	-2.99694	0.00272703	0.0258183	uif
Surf6	125.633	-0.835684	0.278917	-2.99617	0.00273393	0.0258421	Surf6
scf	663.273	-0.632636	0.211142	-2.99625	0.0027332	0.0258421	scf
KCNQ	527.529	0.954467	0.31858	2.996	0.00273546	0.0258421	KCNQ
CG33920	52.5848	1.95738	0.65346	2.99542	0.00274069	0.0258729	CG33920
CG3792	210.423	-0.606048	0.202632	-2.99088	0.00278177	0.0262418	CG3792
CG5805	540.946	0.54674	0.182989	2.98783	0.00280966	0.0264859	CG5805
f-cup	523.865	0.857759	0.287246	2.98615	0.00282513	0.0266126	f-cup
nAChRbeta1	121.945	1.66062	0.556406	2.98455	0.00283992	0.0267327	nAChRbeta1
Lnk	519.938	0.662681	0.222072	2.98408	0.00284436	0.0267553	Lnk
FarO	239.101	-1.28198	0.429812	-2.98265	0.00285762	0.0268416	FarO
asRNA:CR45367	199.271	0.819203	0.274654	2.98268	0.00285739	0.0268416	asRNA:CR45367
CG31776	93.0822	1.53232	0.514056	2.98083	0.00287465	0.0269822	CG31776
CG9837	72.9692	-1.67068	0.561192	-2.97703	0.00291059	0.0273001	CG9837
CLIP-190	4861.23	0.681941	0.229146	2.97602	0.00292017	0.0273704	CLIP-190
CG17508	1960.46	1.08188	0.363858	2.97334	0.00294577	0.0275906	CG17508
NfI	925.996	1.08732	0.365744	2.97289	0.00295009	0.0276113	NfI
djl	12.1113	3.10665	1.04543	2.97164	0.00296218	0.0277006	djl
eff	4210.96	-0.668322	0.224914	-2.97146	0.00296385	0.0277006	eff
Or43b	88.0387	0.826282	0.278199	2.97011	0.00297691	0.0278029	Or43b
CG16713	130.263	2.03895	0.686877	2.96843	0.00299328	0.0279358	CG16713
CG3632	733.898	0.550275	0.1855	2.96645	0.00301264	0.0280965	CG3632
Rpn13R	22.1114	2.46473	0.831069	2.96573	0.00301962	0.0281416	Rpn13R
Cpr97Eb	270.86	-1.14882	0.387485	-2.9648	0.00302876	0.0281845	Cpr97Eb
Mp	1313.52	0.575623	0.194165	2.96461	0.00303066	0.0281845	Mp
Had2	26.4661	-1.98154	0.668335	-2.96489	0.00302791	0.0281845	Had2
CG5664	73.7416	1.06965	0.360874	2.96406	0.00303611	0.0282152	CG5664
CG6330	425.988	-0.807662	0.272535	-2.96352	0.00304141	0.0282444	CG6330
lncRNA:CR45048	39.0782	-1.53713	0.518964	-2.96192	0.0030573	0.0283519	lncRNA:CR45048
MED21	243.143	0.796828	0.269011	2.96207	0.00305582	0.0283519	MED21
FoxP	44.4983	2.02794	0.684811	2.96132	0.00306325	0.028367	FoxP
CG46308	117.03	1.4571	0.492015	2.96149	0.00306159	0.028367	CG46308
CG2691	428.087	-0.645138	0.217887	-2.96089	0.00306753	0.0283865	CG2691
CG13228	75.8063	2.52065	0.851414	2.96054	0.00307096	0.0283982	CG13228
mrj	1703.33	-0.773268	0.261259	-2.95977	0.00307865	0.0284493	mrj
GM130	349.797	-0.542889	0.183456	-2.95923	0.00308406	0.0284592	GM130
pelo	363.42	-0.615034	0.20783	-2.95932	0.00308321	0.0284592	pelo
Nup133	144.808	-0.978843	0.330844	-2.95862	0.00309015	0.0284754	Nup133
Fkbp12	1725.1	-0.541345	0.182972	-2.95863	0.00309014	0.0284754	Fkbp12
ptc	204.352	-0.996493	0.3371	-2.95608	0.00311577	0.0286914	ptc
sordd2	126.152	-0.959432	0.324681	-2.95499	0.00312675	0.0287722	sordd2
Jupiter	932.483	-0.800789	0.271037	-2.95453	0.00313141	0.0287949	Jupiter
Glg1	779.376	-0.650115	0.220107	-2.95363	0.00314058	0.0288591	Glg1
BomS3	101.506	1.35383	0.458888	2.95025	0.00317517	0.0291465	BomS3
snoRNA:Psi18S-1347c	6.09128	-4.41743	1.49736	-2.95014	0.00317631	0.0291465	snoRNA:Psi18S-1347c
CG11257	113.603	1.03784	0.351933	2.94898	0.00318823	0.0292354	CG11257
dnc	10197.4	0.909253	0.308452	2.94779	0.00320053	0.0293277	dnc
CR43275	8.51032	-4.56805	1.55034	-2.94647	0.0032142	0.0294325	CR43275
CG7806	425.42	-0.772532	0.262229	-2.94602	0.00321891	0.0294551	CG7806
ihog	218.443	-0.971823	0.329976	-2.94514	0.00322813	0.0295188	ihog
bbg	1851.09	-1.30505	0.44318	-2.94475	0.00323214	0.0295349	bbg
CG2126	96.1125	0.926424	0.314641	2.94438	0.00323598	0.0295494	CG2126
Ir62a	54.5621	1.67402	0.568712	2.94352	0.00324499	0.0296111	Ir62a
GlyRS	538.503	-0.732759	0.249025	-2.94251	0.00325566	0.0296878	GlyRS
Ugt317A1	65.261	-1.12406	0.382091	-2.94186	0.00326249	0.0297088	Ugt317A1
lncRNA:SMRG	1252.98	0.769915	0.261709	2.94188	0.00326226	0.0297088	lncRNA:SMRG
CG17271	514.014	-0.849122	0.288741	-2.94078	0.00327391	0.0297792	CG17271
CG17036	37.6006	-2.45799	0.835854	-2.9407	0.00327476	0.0297792	CG17036
CenG1A	778.388	0.741484	0.252183	2.94026	0.00327933	0.0298001	CenG1A
Uhg8	28.3478	1.58559	0.539403	2.93953	0.00328707	0.0298498	Uhg8
CG1910	914.56	-0.650409	0.221291	-2.93916	0.00329103	0.029865	CG1910
CG31908	380.321	-0.581398	0.197891	-2.93796	0.00330376	0.0299598	CG31908
CG10463	70.2447	-0.943076	0.321115	-2.93688	0.00331532	0.0300232	CG10463
CG17134	532.726	3.40842	1.16055	2.9369	0.00331508	0.0300232	CG17134
mt:ND4	18362.3	1.09102	0.371593	2.93606	0.00332408	0.0300818	mt:ND4
beat-IIIc	82.7285	1.0638	0.362378	2.9356	0.00332903	0.0301058	beat-IIIc
CG5810	1313.67	-1.23299	0.420141	-2.93471	0.00333862	0.0301717	CG5810
CG32407	40.0299	-1.52989	0.521387	-2.93427	0.00334337	0.0301938	CG32407
CAH1	2959.01	-0.598032	0.203886	-2.93317	0.00335522	0.0302801	CAH1
Ehbp1	1418.64	0.481896	0.164328	2.93252	0.00336227	0.030302	Ehbp1
CG42460	15.063	5.35812	1.82706	2.93265	0.00336088	0.030302	CG42460
mir-9373	28.4564	-1.74059	0.593596	-2.93228	0.00336485	0.0303045	mir-9373
CG13003	349.174	-0.961338	0.327904	-2.93177	0.00337038	0.0303334	CG13003
CG18178	132.233	-0.993384	0.339099	-2.92949	0.00339524	0.0305153	CG18178
CG8738	131.992	-0.688256	0.234924	-2.9297	0.00339292	0.0305153	CG8738
CG42541	96.0486	1.21891	0.416175	2.92883	0.00340235	0.0305583	CG42541
Lon	670.353	-0.494269	0.168862	-2.92706	0.00342183	0.0307122	Lon
CG34112	102.051	1.01281	0.346093	2.92642	0.00342891	0.0307547	CG34112
Fie	201.269	1.26131	0.43106	2.92606	0.00343286	0.0307691	Fie
Nak	1143.06	0.62103	0.212265	2.92573	0.00343646	0.0307803	Nak
CG8854	144.556	-1.02411	0.350316	-2.92338	0.00346254	0.0309928	CG8854
CG46456	311.937	-1.37736	0.471255	-2.92274	0.00346968	0.0310355	CG46456
haf	1848.19	-0.723661	0.247795	-2.9204	0.00349578	0.0312477	haf
CG33170	694.913	0.898905	0.307896	2.91951	0.00350583	0.0313162	CG33170
CG45076	21804.1	0.606087	0.207646	2.91884	0.00351332	0.0313617	CG45076
Art3	165.019	-0.783186	0.268356	-2.91846	0.00351765	0.0313791	Art3
CG6830	42.2154	-1.23607	0.423644	-2.91771	0.00352614	0.031412	CG6830
Cht2	609.674	-0.698619	0.239424	-2.91792	0.00352376	0.031412	Cht2
ko	856.763	-0.881679	0.302228	-2.91726	0.00353121	0.031433	ko
Debcl	127.102	-0.822149	0.28184	-2.91708	0.00353328	0.031433	Debcl
CG3168	2793.68	0.603746	0.207034	2.91617	0.00354358	0.0315033	CG3168
melt	490.84	-0.617337	0.211765	-2.9152	0.00355462	0.0315801	melt
calypso	125.462	0.874517	0.300085	2.91423	0.0035657	0.031657	calypso
CG12902	15.5085	4.88075	1.67556	2.91291	0.00358073	0.0317475	CG12902
CG43397	15.5085	4.88075	1.67556	2.91291	0.00358073	0.0317475	CG43397
Dyrk3	1231.99	0.643087	0.220847	2.91191	0.00359224	0.0318281	Dyrk3
CG6012	26.7868	-3.65293	1.25477	-2.91122	0.00360015	0.0318766	CG6012
CG32152	911.352	-0.691149	0.237532	-2.90972	0.00361757	0.0320093	CG32152
RalGPS	466.926	0.664761	0.228507	2.90915	0.00362412	0.0320456	RalGPS
p23	2196.94	-0.544513	0.187271	-2.90763	0.00364179	0.0321802	p23
GluRIIC	1045.2	0.636431	0.218923	2.9071	0.00364795	0.0322129	GluRIIC
mir-2494	84.4609	-1.74584	0.600897	-2.90539	0.003668	0.0323682	mir-2494
CG4511	577.426	-0.446983	0.15401	-2.90229	0.00370442	0.0326676	CG4511
Sps1	211.074	-0.688436	0.237377	-2.90018	0.00372945	0.0328662	Sps1
Oga	267.937	-0.747486	0.258064	-2.89651	0.00377338	0.033231	Oga
Ir85a	977.964	-1.29702	0.447825	-2.89627	0.00377625	0.033234	Ir85a
CG7839	283.136	-0.836976	0.289046	-2.89565	0.00378369	0.0332772	CG7839
cos	180.228	-0.763023	0.263558	-2.89509	0.00379055	0.0333152	cos
CG10195	105.687	1.09027	0.376974	2.89215	0.00382611	0.0336052	CG10195
sing	275.863	0.611783	0.211555	2.89184	0.00382997	0.0336167	sing
Osi24	72.1823	-2.04745	0.708284	-2.89072	0.00384363	0.033714	Osi24
Ald1	59224.3	0.765475	0.264963	2.88899	0.00386478	0.0338769	Ald1
lncRNA:CR43418	194.989	-0.782438	0.270867	-2.88864	0.00386906	0.0338917	lncRNA:CR43418
Hk	723.089	0.91854	0.318095	2.88763	0.00388155	0.0339784	Hk
CG34330	393.905	1.00912	0.349648	2.88611	0.00390033	0.0341201	CG34330
CG6441	19.3101	3.56244	1.23459	2.88551	0.00390777	0.0341624	CG6441
Non1	6219.23	-0.671285	0.232704	-2.88471	0.00391772	0.0342266	Non1
Tsp66E	1021.39	-0.901959	0.312693	-2.88449	0.00392049	0.034228	Tsp66E
lncRNA:CR46073	34.876	1.47077	0.510121	2.88317	0.00393692	0.034324	lncRNA:CR46073
lama	313.212	-1.36233	0.472612	-2.88256	0.00394456	0.034324	lama
dao	34.9866	1.4727	0.51081	2.88308	0.00393811	0.034324	dao
Rab14	568.422	0.768887	0.266711	2.88285	0.00394096	0.034324	Rab14
Lip2	60.5247	1.84288	0.6393	2.88265	0.00394345	0.034324	Lip2
Obp44a	1241.97	1.69066	0.587158	2.87939	0.00398444	0.034648	Obp44a
geminin	101.26	-0.929879	0.323107	-2.87793	0.00400296	0.034786	geminin
Nurf-38	1179.38	-0.562564	0.195561	-2.87666	0.00401907	0.034893	Nurf-38
lncRNA:CR44353	13.8888	2.18261	0.758761	2.87654	0.0040206	0.034893	lncRNA:CR44353
CG12811	179.394	-0.68678	0.238854	-2.87531	0.00403628	0.035006	CG12811
daw	491.074	-0.888915	0.309191	-2.87497	0.00404065	0.0350207	daw
CG17752	581.006	1.28206	0.446084	2.87403	0.00405276	0.0350838	CG17752
Ced-12	150.075	-0.671959	0.233807	-2.87399	0.00405327	0.0350838	Ced-12
CSN6	171.747	-0.644292	0.224255	-2.87303	0.00406555	0.0351669	CSN6
Gcat	162.951	0.947283	0.329741	2.87281	0.00406841	0.0351685	Gcat
PIG-G	111.397	-1.08394	0.377437	-2.87185	0.00408081	0.0352292	PIG-G
CG30108	46.6915	1.12251	0.390865	2.87185	0.00408076	0.0352292	CG30108
kermit	156.833	-0.652719	0.227299	-2.87163	0.00408363	0.0352304	kermit
Hsp60D	6.39812	6.42674	2.23894	2.87044	0.00409905	0.0353402	Hsp60D
CG42598	65.6332	-1.33246	0.464295	-2.86986	0.00410652	0.0353813	CG42598
Atf6	761.362	0.917463	0.319851	2.86841	0.0041254	0.0354974	Atf6
Art8	72.4904	-0.957538	0.333815	-2.86847	0.00412464	0.0354974	Art8
pont	189.016	-0.816908	0.28501	-2.86625	0.00415372	0.0357176	pont
CG30183	219.755	0.79186	0.27633	2.86563	0.00416177	0.0357634	CG30183
CG4911	963.642	0.723582	0.252594	2.8646	0.00417537	0.0358436	CG4911
jbug	3956.4	-0.915536	0.319613	-2.86451	0.00417656	0.0358436	jbug
CG32107	15.3036	1.94952	0.680781	2.86365	0.00418795	0.0359178	CG32107
Polr1B	148.146	-0.858332	0.299787	-2.86314	0.00419468	0.035952	Polr1B
Tsp42Ed	91.1371	1.52792	0.533715	2.86281	0.00419908	0.0359663	Tsp42Ed
Hexo1	690.374	-0.694952	0.242792	-2.86233	0.00420535	0.0359965	Hexo1
Osi12	6.13977	-4.8718	1.70262	-2.86135	0.00421844	0.0360849	Osi12
CG43191	149.713	1.3829	0.483562	2.85981	0.00423894	0.0362367	CG43191
CG44249	41.6768	1.35201	0.472872	2.85915	0.00424784	0.0362655	CG44249
CG43103	147.344	-0.948734	0.331848	-2.85894	0.00425059	0.0362655	CG43103
CG8814	318.209	-0.773192	0.270423	-2.85919	0.00424722	0.0362655	CG8814
CG42381	579.195	-0.565489	0.198058	-2.85517	0.00430134	0.0365795	CG42381
PIG-M	579.195	-0.565489	0.198058	-2.85517	0.00430134	0.0365795	PIG-M
CG42380	579.195	-0.565489	0.198058	-2.85517	0.00430134	0.0365795	CG42380
Oatp58Dc	145.186	1.49722	0.524372	2.85527	0.00430009	0.0365795	Oatp58Dc
CG42379	579.195	-0.565489	0.198058	-2.85517	0.00430134	0.0365795	CG42379
CG11095	66.2403	0.89098	0.312105	2.85475	0.00430712	0.036605	CG11095
mGluR	66.0553	1.65371	0.579587	2.85326	0.00432735	0.036753	mGluR
CG42390	5016.91	0.604859	0.212152	2.85107	0.00435728	0.0369833	CG42390
CG13177	938.096	0.74393	0.261044	2.84983	0.00437425	0.0371033	CG13177
CG5731	216.203	-1.19253	0.418538	-2.84927	0.00438192	0.0371444	CG5731
Dlc90F	530.552	-0.664097	0.23313	-2.84862	0.00439098	0.0371972	Dlc90F
CG8223	520.974	-0.737277	0.258857	-2.8482	0.0043967	0.0372216	CG8223
snoRNA:Psi28S-3091b	11.5277	2.49565	0.876634	2.84686	0.00441528	0.0373089	snoRNA:Psi28S-3091b
CG43315	22.6137	2.97978	1.0467	2.84684	0.00441554	0.0373089	CG43315
spz4	165.234	1.04972	0.368678	2.84725	0.00440986	0.0373089	spz4
RapGAP1	557.509	-0.670217	0.235634	-2.84431	0.00445076	0.0375823	RapGAP1
CG42855	99.8262	1.15216	0.405172	2.84362	0.00446038	0.0376393	CG42855
Spn43Aa	25.1847	-3.63872	1.28091	-2.84074	0.00450097	0.0379574	Spn43Aa
CG42847	19.3537	2.28221	0.803471	2.84044	0.00450516	0.0379683	CG42847
CG7083	373.762	0.90936	0.320458	2.83769	0.00454413	0.0382722	CG7083
asRNA:CR31845	39.0836	-1.40964	0.49699	-2.83636	0.00456314	0.0384076	asRNA:CR31845
lark	645.35	0.421192	0.148522	2.83589	0.00456986	0.038415	lark
CG9777	15.3269	2.93875	1.03624	2.83598	0.00456857	0.038415	CG9777
NK7.1	413.793	0.679932	0.239856	2.83475	0.0045861	0.0385147	NK7.1
lncRNA:CR45327	82.1162	1.42129	0.501398	2.83465	0.0045876	0.0385147	lncRNA:CR45327
CG11444	417.066	-0.545233	0.192367	-2.83433	0.00459212	0.038528	CG11444
sncRNA:357	696.614	-0.663043	0.234002	-2.83349	0.00460426	0.0386052	sncRNA:357
vsg	5889.46	-0.475161	0.167727	-2.83294	0.00461217	0.0386468	vsg
GEFmeso	597.979	0.635822	0.22446	2.83267	0.00461611	0.0386551	GEFmeso
CG13051	629.247	-3.94221	1.39216	-2.83172	0.00462985	0.0387454	CG13051
AP-1-2beta	436.845	-0.794073	0.280509	-2.83083	0.00464273	0.0388285	AP-1-2beta
Srpk79D	2039.81	0.772917	0.273205	2.82907	0.0046683	0.0390175	Srpk79D
CG42673	751.545	0.662122	0.234067	2.82877	0.00467273	0.0390296	CG42673
CG9143	124.707	-0.890988	0.315072	-2.82788	0.00468567	0.0391128	CG9143
SMSr	194.278	0.813361	0.287669	2.82742	0.00469248	0.0391448	SMSr
CHES-1-like	1333.68	0.80143	0.283506	2.82686	0.00470072	0.0391886	CHES-1-like
peng	338.583	-0.564897	0.199849	-2.82662	0.00470421	0.0391928	peng
CG40498	91.8096	1.51769	0.537154	2.82543	0.00472166	0.0393132	CG40498
CG33655	1093.06	0.677212	0.239817	2.82387	0.0047447	0.03948	CG33655
Rpi	595.596	0.602995	0.213679	2.82196	0.00477309	0.039691	Rpi
asRNA:CR44108	80.5337	-0.985745	0.34941	-2.82117	0.00478485	0.0397637	asRNA:CR44108
CG17770	8.77017	5.05001	1.7907	2.82013	0.00480037	0.0397918	CG17770
Acam	8.77017	5.05001	1.7907	2.82013	0.00480037	0.0397918	Acam
stv	2811.26	-0.78554	0.278539	-2.82022	0.00479913	0.0397918	stv
CG31635	1362.71	0.854874	0.30309	2.82053	0.00479445	0.0397918	CG31635
CG9861	11.3057	4.70555	1.66872	2.81985	0.00480467	0.0398023	CG9861
CG17122	5.19845	4.97096	1.76372	2.81845	0.00482559	0.0399504	CG17122
CG31231	11.3245	3.65679	1.29767	2.81796	0.00483297	0.0399863	CG31231
CG9021	794.621	-5.90209	2.09472	-2.8176	0.00483839	0.0400059	CG9021
lncRNA:CR44187	5.03005	-5.68288	2.01743	-2.81689	0.00484905	0.0400688	lncRNA:CR44187
lncRNA:CR43928	29.146	2.86094	1.0159	2.81615	0.00486031	0.0401365	lncRNA:CR43928
CanA1	937.991	0.646598	0.229643	2.81567	0.00486751	0.0401708	CanA1
mir-2282	7.94997	3.47073	1.23278	2.81536	0.0048723	0.040185	mir-2282
CG43394	546	-0.984627	0.349813	-2.81472	0.00488191	0.0402389	CG43394
CG6329	429.758	1.33279	0.473577	2.81431	0.00488823	0.0402405	CG6329
dpr18	59.2684	1.44035	0.511779	2.8144	0.00488679	0.0402405	dpr18
CG14135	77.3981	1.09412	0.388903	2.81334	0.00490295	0.0403364	CG14135
ken	340.363	-0.726455	0.258434	-2.81099	0.00493889	0.0406066	ken
CG7557	4.94597	5.95833	2.12046	2.80992	0.00495531	0.0407161	CG7557
lncRNA:CR45668	283.199	0.92353	0.328984	2.80722	0.00499707	0.0410335	lncRNA:CR45668
CG6923	324.419	0.951045	0.339059	2.80495	0.00503244	0.0412981	CG6923
asRNA:CR45209	51.11	-1.22446	0.436694	-2.80394	0.0050483	0.0413765	asRNA:CR45209
Sdb	6492.96	-1.07195	0.382289	-2.80402	0.00504696	0.0413765	Sdb
Polr1A	440.034	-0.67319	0.240136	-2.80337	0.00505711	0.0414228	Polr1A
emc	1198.03	-0.73762	0.263164	-2.80289	0.00506469	0.0414591	emc
Stlk	324.825	0.736017	0.262631	2.80248	0.00507114	0.0414859	Stlk
gdl	69.4105	1.36368	0.486689	2.80195	0.0050794	0.0415276	gdl
CG17597	277.138	-0.907383	0.323901	-2.80142	0.00508783	0.0415707	CG17597
kumpel	1185.19	1.26995	0.453416	2.80085	0.00509686	0.0415926	kumpel
CG34278	68.6911	2.81745	1.00587	2.80101	0.00509424	0.0415926	CG34278
CG43124	34.7575	-2.14399	0.765766	-2.7998	0.00511341	0.0416759	CG43124
CG44666	200.243	-5.2291	1.86758	-2.79993	0.00511138	0.0416759	CG44666
CG42494	231.821	0.870842	0.311064	2.79956	0.00511725	0.0416813	CG42494
TwdlN	2474.33	-3.7381	1.33538	-2.79927	0.00512183	0.0416927	TwdlN
CCT6	1089.6	-0.589609	0.210663	-2.79882	0.00512896	0.0417005	CCT6
lncRNA:CR44834	10.3059	2.59087	0.925703	2.79881	0.00512914	0.0417005	lncRNA:CR44834
Rab6	700.75	-0.617127	0.220515	-2.79857	0.00513294	0.0417056	Rab6
cbs	163.998	0.722462	0.258245	2.79758	0.00514864	0.0417814	cbs
CG9150	26.8659	1.2695	0.453772	2.79765	0.00514755	0.0417814	CG9150
Gpdh3	150.806	0.860706	0.307753	2.79674	0.00516207	0.0418332	Gpdh3
CG17108	109.359	1.00479	0.359293	2.79658	0.00516459	0.0418332	CG17108
asRNA:CR44872	287.224	0.651107	0.232809	2.79674	0.00516204	0.0418332	asRNA:CR44872
CG17163	72.6905	0.885555	0.316992	2.79362	0.00521218	0.0421926	CG17163
CG10237	289.104	-0.835035	0.298966	-2.79307	0.00522099	0.0422379	CG10237
CG31797	6.03018	5.43064	1.94503	2.79206	0.00523738	0.0423443	CG31797
CG34215	102.199	-1.36081	0.487667	-2.79045	0.0052634	0.0425286	CG34215
CG43373	114.667	0.949465	0.340306	2.79004	0.00527022	0.0425313	CG43373
CG11815	10.4107	3.8994	1.39759	2.79008	0.00526949	0.0425313	CG11815
U3-55K	54.5538	-1.10913	0.397591	-2.78963	0.0052768	0.0425582	U3-55K
Sac1	670.301	-0.432792	0.155157	-2.78938	0.00528093	0.0425653	Sac1
CG18754	15.1472	-2.27554	0.815944	-2.78884	0.00528964	0.0425714	CG18754
GC	62.5424	1.19149	0.427252	2.78874	0.00529141	0.0425714	GC
CG31793	266.154	-0.896799	0.321536	-2.78911	0.00528534	0.0425714	CG31793
beta-PheRS	263.866	-0.776479	0.278528	-2.7878	0.00530678	0.0426427	beta-PheRS
lwr	506.078	-0.56564	0.202894	-2.78786	0.00530574	0.0426427	lwr
CG34437	99.0532	-1.72997	0.620736	-2.78696	0.00532054	0.0427271	CG34437
lncRNA:CR43264	35.6835	2.14097	0.768992	2.78413	0.00536721	0.0430756	lncRNA:CR43264
CG34180	268.165	0.924736	0.332175	2.78389	0.00537118	0.043081	CG34180
asRNA:CR44115	96.869	-1.51758	0.545252	-2.78326	0.00538156	0.0431379	asRNA:CR44115
CHKov1	665.226	0.465319	0.167289	2.78153	0.00541035	0.0433158	CHKov1
CG7991	46.5016	-1.63406	0.587443	-2.78165	0.00540828	0.0433158	CG7991
CG10264	28.2681	2.39982	0.862831	2.78133	0.00541368	0.043316	CG10264
CG5280	20.3978	1.67697	0.603102	2.78058	0.00542627	0.043346	CG5280
CG34248	16.2145	-4.41757	1.5887	-2.78062	0.00542544	0.043346	CG34248
CG6115	1678.85	1.00842	0.362674	2.78051	0.00542733	0.043346	CG6115
CG15023	304.008	-2.17529	0.782602	-2.77957	0.00544317	0.0434089	CG15023
CG7202	6.24555	5.45221	1.96158	2.7795	0.00544422	0.0434089	CG7202
CG32801	16.4588	1.92813	0.693709	2.77945	0.00544514	0.0434089	CG32801
CG31013	6.52503	4.62884	1.66646	2.77764	0.00547545	0.0434657	CG31013
Start1	189.654	0.615369	0.221486	2.77837	0.00546328	0.0434657	Start1
zda	947.435	-0.578202	0.208126	-2.77813	0.00546728	0.0434657	zda
lncRNA:CR44662	14.2855	2.03941	0.734136	2.77798	0.00546985	0.0434657	lncRNA:CR44662
RhoGAP16F	80.2007	-1.03754	0.373401	-2.77862	0.00545902	0.0434657	RhoGAP16F
CG1468	224.894	-1.28647	0.463121	-2.77782	0.00547246	0.0434657	CG1468
CG12728	86.3503	1.11165	0.400106	2.7784	0.00546275	0.0434657	CG12728
Nha1	372.854	-1.02664	0.369642	-2.77738	0.00547984	0.0434743	Nha1
CG10214	137.214	-0.845297	0.3045	-2.77602	0.00550286	0.043616	CG10214
CG18368	10.006	3.74738	1.34995	2.77593	0.00550436	0.043616	CG18368
okr	110.052	0.720356	0.25964	2.77444	0.00552966	0.0437901	okr
AGO2	3222.51	-0.466988	0.168396	-2.77315	0.00555166	0.0439151	AGO2
CR33318	10.332	3.75311	1.35339	2.77312	0.00555213	0.0439151	CR33318
orion	764.186	-0.533487	0.192456	-2.77199	0.0055714	0.0440409	orion
MstProx	9.81028	4.60553	1.66161	2.77173	0.00557591	0.04405	MstProx
bel	1688.08	-1.13014	0.407924	-2.77048	0.00559743	0.0441934	bel
GNBP-like3	22.6994	1.59553	0.575947	2.77028	0.00560084	0.0441938	GNBP-like3
asRNA:CR43964	1425.27	-0.877814	0.316942	-2.76963	0.00561196	0.0442283	asRNA:CR43964
CG10337	531.201	0.698741	0.252269	2.76982	0.00560867	0.0442283	CG10337
CG7970	256.788	-0.74254	0.268281	-2.76777	0.00564417	0.0444555	CG7970
CG32055	7.57888	-2.71369	0.980621	-2.76732	0.00565197	0.0444902	CG32055
nrv3	1579.58	1.18242	0.427388	2.76661	0.0056642	0.0445598	nrv3
CG2930	189.776	-1.92717	0.696638	-2.76639	0.00566813	0.044564	CG2930
CG43386	459.063	-1.63943	0.59285	-2.76534	0.0056864	0.0446808	CG43386
Zdhhc8	1204.66	0.948912	0.343219	2.76474	0.00569683	0.0447092	Zdhhc8
Rbm13	131.968	-0.771837	0.279157	-2.76488	0.00569434	0.0447092	Rbm13
CG7896	927.5	-0.63667	0.230454	-2.76268	0.00573289	0.0449461	CG7896
CG30384	9.26903	3.02206	1.09391	2.76262	0.00573387	0.0449461	CG30384
Caf1-55	324.827	-0.805293	0.291538	-2.76222	0.0057409	0.0449744	Caf1-55
ClC-b	248.977	-0.636121	0.230399	-2.76095	0.00576326	0.0450957	ClC-b
yellow-d2	534.027	-1.45568	0.527229	-2.761	0.00576242	0.0450957	yellow-d2
eIF3d1	1827.87	-0.459485	0.166436	-2.76073	0.00576715	0.0450993	eIF3d1
udt	665.642	-0.702988	0.254691	-2.76016	0.00577735	0.0451259	udt
CG7173	30.6753	-2.62375	0.950583	-2.76015	0.00577743	0.0451259	CG7173
CG18549	311.243	-1.48166	0.5382	-2.75299	0.00590531	0.0460972	CG18549
CG15093	1456.94	-0.871026	0.31643	-2.75266	0.00591127	0.0461164	CG15093
stol	106.373	1.45834	0.529934	2.75192	0.00592464	0.0461658	stol
IM33	949.436	1.06502	0.386983	2.75211	0.00592128	0.0461658	IM33
CG4712	19.8545	2.64828	0.962479	2.75153	0.00593184	0.0461945	CG4712
asRNA:CR45136	15.1846	1.8879	0.686347	2.75065	0.0059478	0.0462912	asRNA:CR45136
CG46312	2615.8	-0.439354	0.159851	-2.74852	0.00598651	0.0465416	CG46312
CG9689	147.856	-1.09435	0.398162	-2.74849	0.00598706	0.0465416	CG9689
Prosap	1646.69	0.72238	0.262901	2.74773	0.00600099	0.0466223	Prosap
gbb	281.465	-0.663125	0.241399	-2.74701	0.00601421	0.0466973	gbb
CG8389	126.936	0.689273	0.251055	2.74551	0.00604176	0.0468835	CG8389
B52	1901.66	0.556269	0.202641	2.7451	0.0060492	0.0469053	B52
Ag5r	423.121	3.11454	1.13464	2.74497	0.00605172	0.0469053	Ag5r
Qsox2	434.482	-0.943238	0.343793	-2.74362	0.00607661	0.0470704	Qsox2
CG15408	61.7328	1.65064	0.601783	2.74292	0.00608956	0.0471429	CG15408
Rtca	104.157	0.816237	0.297742	2.74143	0.00611731	0.0473298	Rtca
Ada2a	121.438	0.775152	0.282803	2.74096	0.00612598	0.047341	Ada2a
CG34166	1863.05	1.68269	0.613891	2.74102	0.0061248	0.047341	CG34166
Eaat2	107.284	1.20369	0.439217	2.74054	0.00613377	0.0473734	Eaat2
Mst84Da	9.70642	4.5891	1.67468	2.74029	0.00613846	0.0473817	Mst84Da
kel	1371.89	0.655344	0.239187	2.73988	0.00614607	0.0474125	kel
Spn43Ab	578.271	-0.814536	0.297335	-2.73945	0.00615421	0.0474196	Spn43Ab
brv3	11.7068	2.05609	0.750546	2.73946	0.00615405	0.0474196	brv3
CR43281	44.7819	1.15835	0.422924	2.73892	0.00616417	0.0474198	CR43281
AP-2alpha	954.919	-0.652768	0.238351	-2.73868	0.0061687	0.0474198	AP-2alpha
CR43671	8.77517	2.42804	0.886449	2.73907	0.00616141	0.0474198	CR43671
vari	1035.24	-0.417908	0.152584	-2.73887	0.00616513	0.0474198	vari
CG10116	8.33009	-6.54844	2.39293	-2.73658	0.0062081	0.0476948	CG10116
eIF5	2619.48	-0.436325	0.1595	-2.73558	0.00622701	0.0478036	eIF5
CG32756	87.6124	0.852599	0.311685	2.73545	0.00622954	0.0478036	CG32756
asRNA:CR45896	296.772	-0.965241	0.352925	-2.73498	0.00623849	0.0478442	asRNA:CR45896
CG5715	45.9382	-3.76464	1.37663	-2.73467	0.00624427	0.0478606	CG5715
CG14691	4.67619	6.04048	2.21023	2.73297	0.00627661	0.0480656	CG14691
Ciz1	1403.81	0.644766	0.235929	2.73288	0.00627835	0.0480656	Ciz1
CG14933	548.766	0.802391	0.293628	2.73268	0.00628207	0.0480661	CG14933
CG15554	97.7609	-1.33684	0.48928	-2.73225	0.00629034	0.0481013	CG15554
CG11839	41.556	1.28721	0.471217	2.73168	0.00630126	0.0481567	CG11839
CG18171	92.9521	1.32911	0.486817	2.73021	0.00632933	0.0483431	CG18171
CG12547	641.386	0.556971	0.204049	2.72959	0.00634137	0.0484069	CG12547
Gip	289.111	-0.669162	0.245302	-2.72791	0.00637362	0.0486248	Gip
CG7179	133.777	1.41847	0.520088	2.72736	0.00638429	0.0486497	CG7179
Ube4B	851.139	0.786228	0.288273	2.72737	0.00638408	0.0486497	Ube4B
CG42393	35.7656	2.49614	0.91554	2.72642	0.00640263	0.0486983	CG42393
Mys45A	276.162	-0.585579	0.214807	-2.72608	0.00640924	0.0486983	Mys45A
5.8SrRNA-Psi:CR45857	21.0148	2.14403	0.786464	2.72616	0.00640756	0.0486983	5.8SrRNA-Psi:CR45857
CG5397	366.203	-0.927926	0.340384	-2.72612	0.00640843	0.0486983	CG5397
Pp2A-29B	1522.51	-0.432612	0.158687	-2.7262	0.00640675	0.0486983	Pp2A-29B
sw	458.803	-0.605888	0.222362	-2.72478	0.00643437	0.048861	sw
CG4467	129.649	1.67374	0.614418	2.7241	0.0064477	0.0489339	CG4467
Timp	1127.35	0.977717	0.359012	2.72335	0.00646231	0.0490165	Timp
CG12520	8.62323	2.92878	1.07556	2.72303	0.0064686	0.0490358	CG12520
Pmm2	94.2548	-0.723096	0.265576	-2.72275	0.00647414	0.0490495	Pmm2
ea	471.933	-0.798844	0.293437	-2.72237	0.00648149	0.0490768	ea
Septin2	301.191	-0.518618	0.190536	-2.72188	0.00649111	0.049093	Septin2
CG7878	406.787	-0.649485	0.238614	-2.72191	0.00649061	0.049093	CG7878
SLC22A	57.7436	-1.4874	0.546625	-2.72105	0.00650742	0.0491597	SLC22A
CG30043	37.052	-6.07335	2.23184	-2.72123	0.0065039	0.0491597	CG30043
b6	22.2325	-2.98231	1.09626	-2.72043	0.00651963	0.0492236	b6
CG32066	270.802	0.545334	0.20064	2.71797	0.0065684	0.0495633	CG32066
Pgant2	543.692	-0.844248	0.310742	-2.71687	0.00659016	0.0496989	Pgant2
jus	441.64	0.872152	0.321206	2.71524	0.00662268	0.0498766	jus
fne	921.762	1.52502	0.561632	2.71534	0.00662083	0.0498766	fne
lncRNA:CR44307	16.3159	1.83248	0.674917	2.71512	0.00662513	0.0498766	lncRNA:CR44307
